# Supplementary material for: A neurotrophin functioning with a Toll regulates structural plasticity in a dopaminergic circuit
Source: eLife journal article supplement (doi:10.7554/elife.102222), 2024-10-24
Supplement: fig5-figsupp1-data2 [file elife-102222-fig5-figsupp1-data2-v1.zip]

Figure 5 figure supplement 1 - source data 2

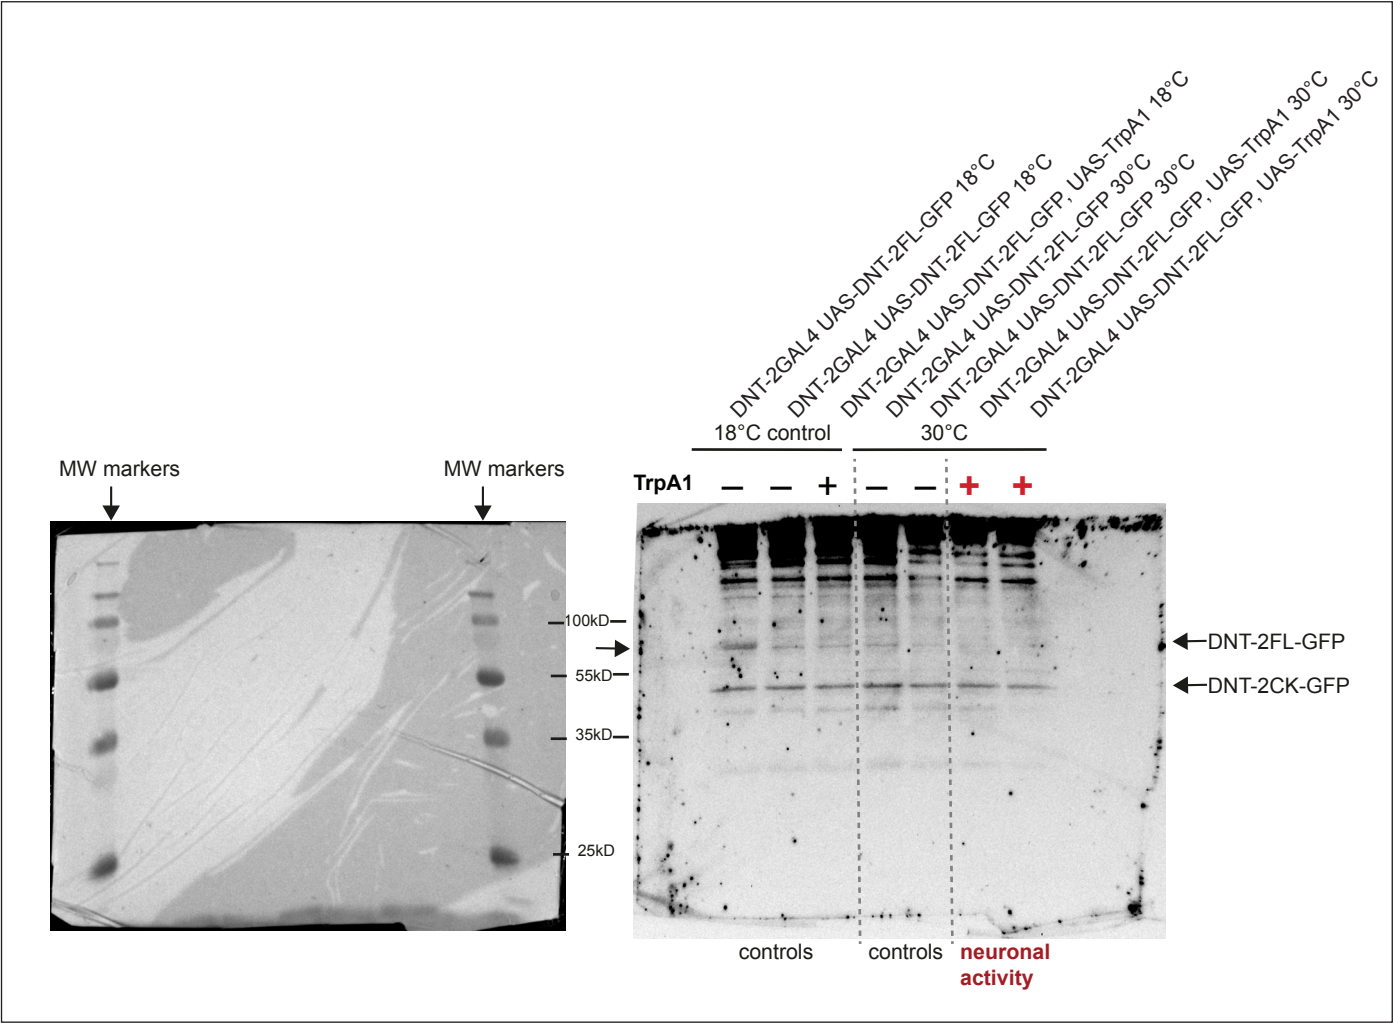

Original membranes corresponding to Figure 5 figure supplement 1B. Left: molecular weight (MW) markers. Right: uncropped membrane, with molecular weight markers indicated (kilo Dalton) and arrows indicate the positions of DNT-2-FL-GFP and DNT-2-CK-GFP. Genotypes indicated on top of lanes.
