# Supplementary material for: A neurotrophin functioning with a Toll regulates structural plasticity in a dopaminergic circuit
Source: eLife. 2024 Dec 20;13:RP102222. doi: 10.7554/eLife.102222 (PMC11661795; doi:10.7554/eLife.102222)
Supplement: Figure 2—source data 1. [file elife-102222-fig2-data1.xlsx]

## Sheet: Figuire 2C source data 1
Figure 2C Over-expression of DNT-2 increased TH mRNA levels.
Data used to generate graph in Figure 2C
qPCR
Genotype	TH mRNA/GAPDH
tubGal80ts / +; DNT2Gal4 / +	1.012
	1.006
	1.007
	0.965
tubGal80ts ; DNT2Gal4 / UAS-DNT-2FL	1.266
	1.249
	1.607
	1.748
	1.304
(Oregon) +/+; UAS-DNT-2FL/+	0.931
	1.004
	1.248
see Supplementary File 2
