# Supplementary material for: A neurotrophin functioning with a Toll regulates structural plasticity in a dopaminergic circuit
Source: eLife. 2024 Dec 20;13:RP102222. doi: 10.7554/eLife.102222 (PMC11661795; doi:10.7554/eLife.102222)
Supplement: Figure 2—source data 2. [file elife-102222-fig2-data2.xlsx]

## Sheet: Figure 2D source data 2
Figure 2D Knocking-down Dop2R receptor increased cAMP levels upon DNT-2 neuron stimulation
Data used to generate graph in Figure 2D, see Supplementary File 2.
no retinal control												with retinal control															Dop2R-RNAi with retinal
Genotype	time	YFP/CFP signal intensity per brain normalised to time 0										Genotype	time	YFP/CFP signal intensity per brain normalised to time 0													Genotype	time	YFP/CFP signal intensity per brain normalised to time 0
UAS-Epac1-camps / +; DNT-2Gal4 / UAS-CsCrimson-tdTomato / + (Oregon)	0	1	1	1	1	1	1	1	1	1		UAS-Epac1-camps / +; DNT-2Gal4 / UAS-CsCrimson-tdTomato / + (Oregon)	0	1	1	1	1	1	1	1	1	1	1	1	1		UASEpac1-camps / UAS-Dop2RRNAi; DNT-2Gal4 / UAS-CsCrimsont-dTomato with Retinal	0	1	1	1	1	1	1	1	1	1	1	1	1	1	1	1	1	1
	30	1.00197	0.977258	0.97731	0.986513	0.986117	0.991501	1.0055	0.971054	0.97665			30	0.901542	0.976165	1.01351	0.957473	0.968883	0.944488	0.97595	0.952692	0.97	0.901	0.986717	0.990647			30	1.00376	1.03729	0.949772	1.03384	0.934311	0.97992	0.953271	1.03469	0.925079	0.943777	0.970818	0.971579	1.00276	0.964392	0.93185	0.937192	0.932906
	60	0.959566	0.964548	0.976229	0.986513	0.974922	0.995751	1.00079	0.99173	0.95533			60	0.852313	0.938559	0.991892	0.944107	0.955446	0.935765	0.967417	0.923328	0.931	0.896	0.993359	0.981295			60	0.995485	1.04362	0.921867	0.99825	0.875679	0.965194	0.940421	1.00226	0.907302	0.917576	0.899427	0.934737	0.961417	0.890632	0.8637	0.872537	0.856931
	90	0.954635	0.951839	0.995138	0.969814	0.978504	0.989377	0.991359	0.951757	0.93401			90	0.847568	0.939619	1.03243	0.942892	0.970297	0.90563	0.929403	0.906199	0.944	0.877	0.97723	0.966187			90	0.992476	1.02212	0.877727	0.992999	0.789359	0.930388	0.91764	1.01282	0.915556	0.902293	0.952579	0.925263	0.911024	0.853752	0.811776	0.802956	0.76961
	120	0.961538	0.936455	0.950297	0.970456	0.9279	1.00425	0.995287	0.955203	0.921827			120	0.74911	0.907309	1.03784	0.930741	0.975955	0.866772	0.924748	0.875204	0.921	0.872	0.995256	0.966906			120	0.999248	1.0158	0.868595	0.967911	0.723127	0.912985	0.910047	0.983409	0.867937	0.8881	0.920271	0.925263	0.893307	0.802883	0.786741	0.783867	0.75185
	150	0.959566	0.928428	0.955159	0.940912	0.936408	0.98796	0.965436	0.922812	0.899492			150	0.713523	0.850106	1.03514	0.907655	0.954031	0.85567	0.895268	0.817292	0.936	0.85	0.962049	0.956835			150	0.983446	1.03034	0.851852	0.958576	0.649294	0.9083	0.893107	0.977376	0.828571	0.855895	0.899427	0.891579	0.865748	0.784655	0.754752	0.747537	0.678836
	180	0.945759	0.879599	0.945975	0.929351	0.925213	0.970255	0.963865	0.955203	0.88731			180	0.690985	0.788665	1.01081	0.891859	0.949788	0.833465	0.90225	0.75367	0.923	0.842	0.995256	0.951079			180	0.986456	0.981037	0.812785	0.93699	0.63355	0.927041	0.869743	0.923077	0.824762	0.818777	0.909328	0.894211	0.845276	0.740568	0.736671	0.691502	0.629502
	210	0.949704	0.885619	0.949757	0.905588	0.904165	0.932011	0.944226	0.938663	0.883249			210	0.683867	0.790254	1.03378	0.869988	0.930693	0.812847	0.867339	0.729201	0.899	0.835	0.960152	0.920863			210	0.973664	0.969027	0.782344	0.910735	0.562432	0.859438	0.88493	0.943439	0.815238	0.813319	0.880146	0.875263	0.817323	0.738448	0.697265	0.671798	0.602368
	240	0.933925	0.872241	0.963263	0.90045	0.904165	0.924221	0.950511	0.937974	0.86802			240	0.660735	0.78072	1.03919	0.854192	0.924328	0.810468	0.890613	0.723491	0.905	0.827	0.971537	0.921583			240	0.992476	0.966498	0.780822	0.908985	0.545603	0.854083	0.849299	0.913273	0.777143	0.787118	0.842105	0.83	0.799213	0.684188	0.67733	0.647783	0.568328
	270	0.932939	0.842809	0.941653	0.894027	0.909539	0.892351	0.953653	0.920744	0.859898			270	0.643535	0.788136	1.03108	0.856622	0.92645	0.793021	0.883631	0.728385	0.919	0.828	0.946869	0.904317			270	0.959368	0.969027	0.742263	0.872229	0.510315	0.878179	0.86215	0.911011	0.758095	0.764192	0.813966	0.831579	0.766535	0.694786	0.660176	0.634236	0.542674
	300	0.912229	0.852843	0.924905	0.903661	0.902821	0.925637	0.932443	0.914542	0.845685			300	0.625741	0.773835	1.03378	0.800729	0.919378	0.768438	0.820016	0.738173			0.983871	0.905755			300	0.951091	0.958281	0.729579	0.854726	0.521716	0.84739	0.834112	0.901207	0.76	0.750546	0.804065	0.834737	0.757874	0.663841	0.648122	0.620074	0.522447
