# Supplementary material for: A neurotrophin functioning with a Toll regulates structural plasticity in a dopaminergic circuit
Source: eLife. 2024 Dec 20;13:RP102222. doi: 10.7554/eLife.102222 (PMC11661795; doi:10.7554/eLife.102222)
Supplement: Figure 3—source data 1. [file elife-102222-fig3-data1.xlsx]

## Sheet: Figure 3 source data 1
Figure 3B. Loss of PAMS labelled with HisYFP in DNT-2 mutants
Data used to make graph in Figure 3B: HisYFP+ labelled PAMs
Genotype	No. of HisYFP+ PAMs
UAShistoneYFP/+; THGal4,R58E02Gal4/+. (Oregon)	169
	165
	151
	175
	164
	168
	177
	188
	161
	194
	164
	183
	177
	165
	176
	161
UAShistoneYFP/+;THGal4,R58E02Gal4,DNT2[37] / DNT2[18]	140
	154
	171
	161
	153
	149
	152
	146
	134
See Supplementary File 2
