# Supplementary material for: A neurotrophin functioning with a Toll regulates structural plasticity in a dopaminergic circuit
Source: eLife. 2024 Dec 20;13:RP102222. doi: 10.7554/eLife.102222 (PMC11661795; doi:10.7554/eLife.102222)
Supplement: Figure 3—source data 2. [file elife-102222-fig3-data2.xlsx]

## Sheet: Figure 3 source data 2
Figure 3C. Loss of PAMS labelled with HisYFP upon Toll-6-RNAi in DANs
Data used to make graph in Figure 3C.		See Supplementary File 2
Genotype	No. of HisYFP+ PAMs
UAShistoneYFP/+; THGal4,R58E02Gal4 /+. (Oregon)	169
	165
	151
	175
	164
	168
	177
	188
	161
	194
	164
	183
	177
	165
	176
	161
UAShistoneYFP/UASToll6RNAi [VDRC 928]; THGal4,R58E02Gal4/+	150
	146
	147
	152
	169
	178
	156
	174
	170
	160
	147
	149
