# Supplementary material for: A neurotrophin functioning with a Toll regulates structural plasticity in a dopaminergic circuit
Source: eLife. 2024 Dec 20;13:RP102222. doi: 10.7554/eLife.102222 (PMC11661795; doi:10.7554/eLife.102222)
Supplement: Figure 3—source data 3. [file elife-102222-fig3-data3.xlsx]

## Sheet: Figure 3 source data 3
Figure 3D. Over-expression of Toll-4[CY] rescued the loss of anti-TH+ cells caused by DNT-2 loss of function
Data used to make graph in Figure 3D
Genotype	No. TH+ cells
wt (CantonS / Oregon)	239
	246
	227
	220
	219
	225
DNT2[37] / DNT2[18]	209
	208
	181
	193
	209
	204
	212
	216
	195
UAS-Toll-6[CY] / +; TH-GAL4 R58E02GAL4 DNT-2[18] / DNT2[37]	235
	298
	336
	300
	207
	246
	278
	260
	289
	270
	241
	163
	263
	215
	240
	246
	283
	206
