# Supplementary material for: A neurotrophin functioning with a Toll regulates structural plasticity in a dopaminergic circuit
Source: eLife. 2024 Dec 20;13:RP102222. doi: 10.7554/eLife.102222 (PMC11661795; doi:10.7554/eLife.102222)
Supplement: Figure 3—source data 4. [file elife-102222-fig3-data4.xlsx]

## Sheet: Figure 3 source data 4
Figure 3E. Adult-specific DNT-2-RNAi knock-down in DNT-2 cells caused PAM cells loss
Data used to make graph in Figure 3E: PAMs visualised with R58E02-LexA>LexAOPnTomato
Genotype	No. of nTomato+ PAMs
R58E02LexA / LexAop-nls-tdTomato; DNT2Gal4 / tubGal80ts	100
	92
	103
	89
	77
	108
	100
	84
	116
	110
	113
	93
	76
	109
	84
	81
R58E02LexA / LexAopnls-tdTomato,UASDNT2RNAi; DNT2Gal4 / tubGal80ts	75
	89
	78
	85
	84
	75
	89
	78
	85
	84
	60
	98
	82
	81
	80
	76
	112
	76
	100
See Supplementary File 2
