# Supplementary material for: A neurotrophin functioning with a Toll regulates structural plasticity in a dopaminergic circuit
Source: eLife. 2024 Dec 20;13:RP102222. doi: 10.7554/eLife.102222 (PMC11661795; doi:10.7554/eLife.102222)
Supplement: Figure 3—source data 5. [file elife-102222-fig3-data5.xlsx]

## Sheet: Figure 3 source data 5
Figure 3F. Adult-specific Toll-6-RNAi knock-down in DANs caused PAM cells loss
Data used to make graph in Figure 3F: PAMs visualised with THGAL4 R58E02GAL4 UASHisYFP
Genotype	No. of His-YFP+ PAMs
tubGal80ts / UAShistoneYFP; THGal4,R58E02Gal4/+	194
	182
	167
	160
	196
	191
	188
	154
tubGal80ts / UAShistoneYFP,UASToll6RNAi; THGal4,R58E02Gal4/Toll-6[31]	157
	153
	167
	157
	172
	137
	146
	177
	175
	160
	162
	166
	155
	178
	147
See Supplementary File 2
