# Supplementary material for: A neurotrophin functioning with a Toll regulates structural plasticity in a dopaminergic circuit
Source: eLife. 2024 Dec 20;13:RP102222. doi: 10.7554/eLife.102222 (PMC11661795; doi:10.7554/eLife.102222)
Supplement: Figure 3—source data 6. [file elife-102222-fig3-data6.xlsx]

## Sheet: Figure 3 source data 6
Figure 3G Adult specific alterations in DNT-2 levels modified PAM cell number
Data used to generate graphs in Figure 3G. See Supplementary File 2
Figure 3G left			Figure 3G right
Genotype	No. of TH+ PAMs		Genotype	No. of TH+ PAMs
tubGal80ts/+; Toll6Gal4/+ (Oregon)	240		tubGal80ts/+; DNT2Gal4/+ (Oregon)	230
	227			233
	223			190
	222			236
	234			239
	223			203
	239			236
	251			184
	211			226
	258			229
				239
tubGal80ts / UAS-Toll6RNAi; Toll6Gal4/+	220			230
	228			233
	217			217
	196			206
	212			244
	202			223
	224			228
	176			230
				230
				239
				220
				243
				214
			tubGal80ts / UASDNT2RNAi; DNT2Gal4/+	215
				230
				187
				211
				216
				203
				211
				198
				178
				206
				195
				196
				202
				204
				191
				231
				232
				123
				212
				152
				214
				199
				192
				201
				210
				217
			tubGal80ts / +; DNT2Gal4 / UASDNT2FL	233
				242
				247
				231
				251
				250
				246
				232
				230
				242
