# Supplementary material for: A neurotrophin functioning with a Toll regulates structural plasticity in a dopaminergic circuit
Source: eLife. 2024 Dec 20;13:RP102222. doi: 10.7554/eLife.102222 (PMC11661795; doi:10.7554/eLife.102222)
Supplement: Figure 3—source data 7. [file elife-102222-fig3-data7.xlsx]

## Sheet: Figure 3 source data 7
Figure 3H Adult specific DNT-2 RNAi knock-down induced apoptosis
Data used to generate graph in Figure 3H. See Supplementary File 2
Genotype	No. of Dcp1+ cells/brain
tubGal80ts /+; DNT2Gal4 / + (Oregon)	1
	2
	4
	1
	0
	3
	3
	4
	2
	7
	3
	0
	0
	0
	7
	6
tubGal80ts / UAS-DNT2-RNAi; DNT2Gal4 / +	6
	1
	28
	7
	13
	17
	1
	22
	7
	8
	13
	16
	6
	9
	8
	14
	9
	11
	4
	11
	10
	6
	17
	14
	20
	27
tubGal80ts /+ ; DNT2Gal4 / UASDNT2FL	12
	6
	2
	9
	7
	7
	9
	8
	7
	11
	2
	1
