# Supplementary material for: A neurotrophin functioning with a Toll regulates structural plasticity in a dopaminergic circuit
Source: eLife. 2024 Dec 20;13:RP102222. doi: 10.7554/eLife.102222 (PMC11661795; doi:10.7554/eLife.102222)
Supplement: Figure 4—source data 1. [file elife-102222-fig4-data1.xlsx]

## Sheet: Figure4 source data 1
Figure 4B Loss of DAN synapses onto a,b MB lobes in DNT-2 mutants
Data used to evaluate the percentage of the brains with missing PAM synapses in the MB lones in Figure 4B
Genotype	Phenotype		Genotype	Phenotype
Control: UAS Syt GFP/+; R58E02 Gal4/+	normal		UAS Syt GFP/+; DNT2[18] R58E02 Gal4/ DNT2[37]	normal
	normal			normal
	normal			no PAM projections in a/b/g lobe
	normal			normal
	normal			normal
	normal			normal
	normal			normal
	normal			no PAM projections in a/b/g lobe
	normal			no PAM projections in a/b/g lobe
	normal			normal
	normal			no PAM projections in a/b/g lobe
	normal			no PAM projections in a/b/g lobe
	normal			no PAM projections in a/b/g lobe
	normal			normal
	normal			no PAM projections in a/b/g lobe
	normal			normal
	normal			normal
	normal			normal
	normal			no PAM projections in a/b/g lobe
	normal			normal
	normal			normal
	normal			no PAM projections in a/b/g lobe
	normal			normal
				normal
				normal
See Supplementary File 2.
