# Supplementary material for: A neurotrophin functioning with a Toll regulates structural plasticity in a dopaminergic circuit
Source: eLife. 2024 Dec 20;13:RP102222. doi: 10.7554/eLife.102222 (PMC11661795; doi:10.7554/eLife.102222)
Supplement: Figure 4—source data 2. [file elife-102222-fig4-data2.xlsx]

## Sheet: Figure 4 source data 2
Figure 4C. Toll-6 RNAi knock-down in PAM neurons decreased dendritic complexity
Data used to count number of branch points in PAMB2B'2>FB1.1 dendrites in Fig.4C
Genotype	No. branch points		Genotype	No. branch points
Control: MB301BGal4>UAS FlyBow 1.1	469		MB301BGal4>UASToll-6 RNAi[VDRC928]; UAS FlyBow 1.1	294
	410			364
	473			351
	368			396
	514			374
	506			311
	574
	430
see Supplementary File 2
