# Supplementary material for: A neurotrophin functioning with a Toll regulates structural plasticity in a dopaminergic circuit
Source: eLife. 2024 Dec 20;13:RP102222. doi: 10.7554/eLife.102222 (PMC11661795; doi:10.7554/eLife.102222)
Supplement: Figure 4—source data 3. [file elife-102222-fig4-data3.xlsx]

## Sheet: Figure 4 source data 3
Figure 4D. Over-expression of cleaved DNT-2 cell-autonomuosly increased PAM dendritic complexity
Data used to count number of branch points in PAMB2B'2>mCD*-GFP dendrites in Fig.4D
Genotype	No. branch points		Genotype	No. branch points
Control: MB301BGal4> UAS CD8-GFP	215		MB301BGal4>UAS CD8-GFP, UASDNT-2CK	232
	162			368
	249			274
	342			274
	209			468
				299
				336
				383
see Supplementary File 2
