# Supplementary material for: A neurotrophin functioning with a Toll regulates structural plasticity in a dopaminergic circuit
Source: eLife. 2024 Dec 20;13:RP102222. doi: 10.7554/eLife.102222 (PMC11661795; doi:10.7554/eLife.102222)
Supplement: Figure 4—source data 4. [file elife-102222-fig4-data4.xlsx]

## Sheet: Figure 4 source data 4
Figure 4 source data 4. PPL1 misrouting phenotypes with Toll-6 kek-6 RNAi and DNT-2 over-expression
Data used for percentages in Figure 4E. See see Supplementary File 2
Genotype	Phenotype	% in Figure 4E
MB320CG4 UASFB1.1	normal
	normal
	normal
	normal
	normal
	normal
	normal
	normal
	normal
	normal
	misrouting
	n=11 brains (22 clusters)	0.0909
MB320CGal4>UAS FB1.1, UASToll-6 RNAi	misrouting
	misrouting
	misrouting
	misrouting
	misrouting
	misrouting
	misrouting
	normal
	normal
	normal
	n=10 brains (20 clusters)	0.7
MB320CGal4 >UASFB1.1, UAS-kek-6RNAi	misrouting
	misrouting
	misrouting
	misrouting
	misrouting
	misrouting
	normal
	normal
	normal
	normal
	normal
	normal
	n=12 brains (24 clusters)	0.5
MB320CG4>UASFB1.1, UASke-6RNAi UAS-Toll-6 RNAi	misrouting
	misrouting
	misrouting
	misrouting
	misrouting
	misrouting
	misrouting
	misrouting
	normal
	normal
	normal
	normal
	normal
	n=13 brains (26 clusters)	0.615
