# Supplementary material for: A neurotrophin functioning with a Toll regulates structural plasticity in a dopaminergic circuit
Source: eLife. 2024 Dec 20;13:RP102222. doi: 10.7554/eLife.102222 (PMC11661795; doi:10.7554/eLife.102222)
Supplement: Figure 4—source data 5. [file elife-102222-fig4-data5.xlsx]

## Sheet: Figure 4 source data 5
Figure 4 source data 5. PPL1 misrouting phenotypes with Toll-6 kek-6 RNAi and DNT-2 over-expression
Data used for percentages in Figure 4F. See see Supplementary File 2
Genotype	Phenotype	% in Figure 4F
MB320CG4 UASCD8GFP	normal
	normal
	normal
	normal
	normal
	misrouting
	misrouting
	misrouting
	misrouting
	normal
	misrouting
	normal
	normal
	normal
	misrouting
	normal
	normal
	normal
	normal
	normal
	normal
	normal
	normal
	misrouting
	misrouting
	normal
	normal
	normal
	normal
	misrouting
	normal
	normal
	n=32 clusters	0.281
MB320CGal4>UASmCD8GFP UAS DNT-2CK	misrouting
	misrouting
	misrouting
	normal
	normal
	normal
	normal
	normal
	misrouting
	misrouting
	normal
	misrouting
	misrouting
	misrouting
	misrouting
	normal
	misrouting
	normal
	normal
	misrouting
	normal
	normal
	normal
	misrouting
	normal
	misrouting
	misrouting
	normal
	normal
	misrouting
	normal
	normal
	n=32 clusters	0.469
MB320CGal4>UASmCD8GFP UAS DNT-2FL	normal
	misrouting
	normal
	normal
	normal
	misrouting
	misrouting
	misrouting
	misrouting
	misrouting
	normal
	misrouting
	misrouting
	misrouting
	normal
	normal
	misrouting
	misrouting
	misrouting
	misrouting
	normal
	normal
	misrouting
	normal
	misrouting
	misrouting
	misrouting
	misrouting
	misrouting
	misrouting
	misrouting
	normal
	normal
	misrouting
	n=34 clusters	0.647
