# Supplementary material for: A neurotrophin functioning with a Toll regulates structural plasticity in a dopaminergic circuit
Source: eLife. 2024 Dec 20;13:RP102222. doi: 10.7554/eLife.102222 (PMC11661795; doi:10.7554/eLife.102222)
Supplement: Figure 4—source data 6. [file elife-102222-fig4-data6.xlsx]

## Sheet: Figure 4 source data 6
Figure 4 source data 6. Knock-down of Toll-6 and kek6 decreased synapse size.
Data used to generate graphs in Figure 4G. See Supplementary File 2
	Data used to calculate Homer-GCaMP+ post-synaptic density (PSD) size for Figure 4G
	PSD sie at SMP Dendrite			PSD size at MB lobe
Genotype	tub-Gal80ts, R58E02>Homer-GCaMP	tub-Gal80ts, R58E02>HomerGCaMP, kek6 RNAi, Toll-6 RNAi		tub-Gal80ts, R58E02>Homer-GCaMP	tub-Gal80ts, R58E02>HomerGCaMP, kek6 RNAi, Toll-6 RNAi
PSD size	1.63	1.41		0.79	0.82
	1.44	1.84		1.88	1.66
	0.81	1.13		1.68	1.84
	0.58	0.74		1.22	2.26
	1.78	1.24		0.97	1.13
	1.89	1.16		1.6	0.98
	1.86	1.65		0.84	0.66
	2.55	2.17		1.56	1.52
	1.41	3.49		0.36	1.95
	0.64	1.84		0.66	2.12
	0.48	1.46		2.39	1.15
	1.13	0.74		1.14	1.45
	3.12	1.63		0.39	0.94
	1.47	1.04		1.89	1.25
	1.66	1.92		0.63	0.72
	2.29	1.03		0.68	1.89
	0.8	0.7		0.91	1.67
	1.52	0.61		1.79	1.34
	1.71	0.72		0.41	0.61
	3.21	0.64		0.25	0.96
	1.1	0.59		1.26	2.5
	2.75	0.68		0.48	0.89
	1	1.74		2.99	2.8
	1.38	1.18		1.05	1.96
	0.87	1.38		0.83	0.67
	3.05	1.05		1.43	1.68
	1.37	1.8		1.95	0.33
	1.05	1.54		1.91	1.28
	1.4	1.39		0.64	0.87
	0.49	0.78		0.99	0.84
	0.57	1.83		0.83	0.54
	1.01	0.97		0.66	1.43
	1.3	1.33		1.04	1.06
	1.56	1.27		3.48	1.98
	1.39	1.23		1.81	2.42
	0.48	1.84		1.35	2.88
	1.14	1.53		1.41	1.39
	1.76	0.91		1.33	0.77
	1.7	1.95		0.71	0.94
	1.45	1.03		1.84	0.51
	1.53	0.83		0.38	1.29
	2.69	1.45		1.03	1.47
	1.34	1.77		2.08	3
	1.5	1.5		1.38	1.6
	0.41	1.87		0.77	0.57
	1.83	1.03		1.02	0.86
	1.12	2.36		0.41	1.85
	1.52	2.38		1.65	1.54
	1.14	1.04		1.51	2.3
	1.81	0.47		0.81	1.8
	2.94	1.34		2.79	0.44
	2.19	0.86		1.09	0.94
	1.5	2.63		1.66	1.41
	1.29	0.57		0.72	2.11
	0.55	3.05		0.37	1.03
	1.82	5.34		1.12	2.56
	1.91	1.81		1.8	1.14
	3.18	0.97		0.31	0.49
	1.92	4.23		1.14	0.95
	0.84	0.9		1.41	1.55
	0.9	1.08		2.76	1.02
	1.58	1.43		0.41	0.78
	2.81	2.37		1.25	1.05
	0.72	1.57		2.06	1.61
	1.06	1.8		1.29	1.04
	0.67	2.57		1.1	1.29
	2.4	0.92		1.31	1.78
	2.22	1.16		0.35	1.25
	1.15	1.94		0.97	0.92
	1.9	1.42		0.37	1.31
	1.16	1.19		0.48	1.91
	2.71	1.69		0.92	1.96
	1.23	2.97		1.08	2.15
	1.49	0.83		0.54	1.9
	1.51	1.36		0.74	2.21
	1.71	0.79		0.43	0.76
	3.24	0.8		0.35	1.12
	1.76	0.46		0.88	1.22
	1.95	0.91		1.79	0.85
	1.05	0.64		1.2	0.42
	2.16	1.14		0.95	0.49
	2.27	0.37		0.37	1.3
	1.43	0.3		0.5	1.26
	4.19	0.33		0.91	0.85
	2.04	1.67		0.93	1.41
	0.95	1.58		1.08	0.91
	1.33	1.11		0.4	0.87
	1.91	1.45		0.39	1.25
	2.3	0.52		1.19	1.14
	0.93	0.6		0.35	0.7
	2.97	3.73		0.48	2.75
	1.28	2.37		0.64	1.85
	0.68	2.12		0.82	0.56
	0.73	1.6		0.25	1.06
	1.2	1.76		0.45	0.92
	1.83	1.4		0.45	0.41
	5.31	1.59		1.44	0.77
	1.56	0.68		0.48	1.1
	1.25	6.23		0.94	1.61
	1.03	0.74		0.94	0.44
	1.32	1.97		1.37	1.49
	3.73	1.94		0.81	1
	0.96	1.58		1.06	1.08
	1.07	0.46		0.83	0.78
	1.5	1.99		1.47	0.93
	0.78	2.24		1.01	0.91
	1.89	1.76		1.11	0.32
	2.82	0.7		0.57	1.04
	1.27	1.19		0.95	2.13
	1.5	2.16		0.98	1.54
	1.29	0.75		1.14	0.48
	1.56	1.7		1.17	1.66
	1.84	0.87		1.15	0.86
	0.86	0.94		0.22	0.73
	1.13	2.01		1.21	1.35
	1.62	1.09		0.79	1.21
	1.63	1.36		1.3	1.29
	4.12	1.71		1.27	1.49
	2.07	1.2		0.4	1
	0.9	2.26		1.99	0.28
	0.67	0.66		1.82	0.64
	0.93	2.86		2.51	0.64
	1.68	1.2		1.23	1.19
	0.65	1.81		2.92	0.95
	0.34	2.06		0.91	1.23
	1.21	1.5		0.33	0.64
	1.91	1.77		2.05	1
	1.03	0.67		1.75	0.91
	0.81	1.09		1.64	1.43
	1.88	1.38		0.37	2.2
	0.36	3.75		1.04	2.79
	0.81	0.88		2.24	1.55
	0.73	0.95		1.31	0.85
	1.06	2.33		1.37	1.08
	0.78	2.5		0.47	2.52
	2.87	1.61		0.38	0.55
	0.99	1.13		0.43	2.93
	0.74	1.5		0.85	1.75
	2.21	5.21		0.68	1.47
	1.47	0.99		0.25	1.2
	1.58	1.95		0.55	2.03
	1.61	1.12		0.91	0.37
	1.42	1.47		1.43	2.74
	2.64	1.3		2.13	3.79
	0.77	1		2.1	2.3
	1.18	1.09		0.56	1.09
	1.75	1.18		0.54	1.01
	1.06	1.12		1.87	1.06
	0.97	1.51		1.39	2.19
	0.78	2.36		0.25	0.87
	2.13	0.6		0.59	0.7
	1.93	1.25		0.45	0.84
	0.98	0.8		0.87	2.63
	1.04	0.92		1.27	1.99
	1.79	2.18		1.01	1.2
	2.16	0.84		0.1	1.05
	1.07	2.23		0.37	2.06
	2.72	1.36		1.81	0.82
	1.53	0.83		1.93	1.77
	1.3	1.43		0.41	2.81
	1.19	2.44		1.01	1.91
	0.63	0.78		0.57	1.99
	1.08	2.16		1.55	0.8
	0.9	0.8		0.92	1.14
	0.61	3.13		0.69	0.95
	1.17	2.04		0.71	0.4
	2.32	1.65		0.47	0.58
	1.18	0.74		0.94	1.57
	1.06	2.6		1.25	1.92
	0.92	0.82		0.4	0.74
	1.01	0.86		1.49	0.98
	0.76	1.15		0.63	0.71
	0.78	0.89		1.01	0.57
	0.94	1.49		0.19	1.11
	0.55	0.84		1.65	1.64
	1.05	0.82		0.26	0.58
	0.87	0.57		1.14	0.84
	1.56	1.69		0.55	1.47
	1.1	0.5		0.65	1.25
	1.04	0.97		0.87	0.49
	1.17	1.26		0.46	1.7
	1.17	0.51		1.62	1.37
	1.26	2.23		0.24	1.01
	1.79	1.3		1.78	1.71
	1.65	1.78		0.94	0.55
	1.96	1.93		0.6	3.34
	5.14	0.9		0.64	4.11
	3.41	2.31		0.34	0.37
	1.35	0.85		0.91	2.29
	2.23	5.16		0.36	1.15
	0.67	0.96		1.06	0.95
	1.3	1.31		1.12	0.44
	2.42	0.65		0.81	1.04
	3.13	0.57		0.96	0.73
	0.96	1.74		0.93	0.76
	0.96	0.82		0.76	0.77
	1.78	0.44		1.04	0.85
	0.81	0.8		0.91	0.38
	0.68	0.55		0.43	0.67
	0.94	0.73		1.1	0.52
	2.94	1.29		1.12	0.98
	1.61	1.61		0.77	0.8
	0.66	0.48		1.12	1.72
	0.62	0.54		0.49	1.29
	0.6	0.99		0.35	0.9
	0.9	0.48		0.33	1.09
	1.14	0.52		0.57	1.41
	3.38	0.86		0.66	2.33
	1.81	2.13		0.22	0.46
	0.86	0.7		1.14	0.74
	0.51	3.02		1.39	2.24
	1.34	1.22		0.68	1.53
	0.75	0.67		1.69	1.04
	3.17	0.35		1.54	1.07
	1.32	1.03		0.32	0.37
	2.5	0.9		0.54	1.31
	1	1.94		1.55	2.77
	1.77	1.44		0.86	1.82
	1.96	0.8		0.93	1.92
	1.48	1.02		1.17	0.98
	1.94	1.18		2.04	1.01
	2.81	1.82		1.61	1.23
	1.9	1.08		1.14	0.31
	1.2	0.51		1.04	1.99
	0.79	0.93		1.25	0.38
	1.2	0.64		0.88	1.16
	0.92	0.95		0.79	0.96
	1.02	0.8		1.19	0.83
	1.66	0.41		0.57	1.44
	1.46	1.38		1.04	0.92
	1.93	0.48		0.9	0.91
	1.15	3.11		0.31	0.89
	0.94	2.45		0.54	1.83
	0.71	1.09		0.98	0.82
	1.46	1.78		1.28	0.92
	0.77	0.94		1.08	1
	1.87	1.58		1.31	0.68
	1.73	1.95		0.32	1.2
	1.13	0.92		2.04	1.94
	0.9	0.96		1.11	1.74
	2.48	1.3		1.75	1.48
	0.95	0.51		0.64	1.44
	1.06	0.95		0.41	1.27
	1.02	0.92		1.15	1.04
	1.06	2.33		1.47	1.74
	1.76	0.56		0.86	1.57
	1.01	2		0.99	1.23
	0.6	0.22		0.66	2.08
	1.13	2.07		0.75	1.37
	1.8	2.63		0.91	1.56
	0.78	0.53		0.98	0.65
	2.05	1.04		0.71	1.11
	1.07	0.81		1.05	1.24
	2.11	1.04		1.23	1.72
	1.36	0.37		0.92	1.48
	1.37	0.56		0.46	0.83
	1.79	1.43		0.89	0.48
	1.28	0.81		0.85	1.62
	1.45	0.99		0.53	2.34
	0.58	1.67		1.56	3.25
	1.2	1.2		1.31	0.99
	1.42	0.87		1.46	0.75
	2.07	0.75		0.58	1.52
	1.41	1.03		1.4	3.16
	0.78	0.38		0.6	0.93
	0.93	0.39		1.02	1.04
	0.95	0.65		1.01	1.42
	1.52	2.36		1.05	2.87
	1.05	0.52		0.47	1.36
	2.96	0.75		0.71	1.06
	1.59	1.37		1.23	2.19
	1.16	0.88		0.33	2.98
	2.78	1.38		0.64	1.59
	0.79	1.42		0.46	0.72
	1.46	0.8		0.32	0.93
	2.04	1.31		0.88	1.49
	1.77	0.98		0.69	0.55
	0.79	1.03		1.95	0.57
	1.59	0.14		0.51	0.63
	0.91	2.59		1.28	0.76
	1.5	0.46		0.94	1.08
	1.06	0.89		0.62	0.91
	0.51	1.98		0.41	2.36
	1.41	0.96		1.46	0.82
	1.83	1.14		1.36	2.18
	1.57	0.87		3.06	1.31
	1.19	1.02		1.37	2.06
	1.07	1.1		0.73	1.74
	1.35	0.41		0.48	1.42
	1.88	0.72		1.62	1.59
	1.44	0.37		0.41	1.07
	0.78	1.28		1.18	1.81
	0.35	0.89		0.29	1.33
	3.15	1		1.07	1.4
	1	2.02		1	1.6
	1.08	0.72		1.72	1.3
	1.35	1.05		0.47	1.4
	0.94	1.15		0.37	1.76
	1.12	1.02		1.08	1.67
	1.04	1.87		1.28	2.02
	1.17	0.94		1.17	0.85
	1.34	1.29		1.24	2.09
	1.23	0.92		0.39	0.93
	0.87	1.92		0.89	0.63
	0.99	1.9		1.2	1.01
	0.7	0.95		1.01	1.49
	1.05	1.22		0.36	1.75
	0.59	0.82		1.25	0.83
	1.32	2.11		0.98	1.79
	0.86	4.35		1.03	1.37
	1.08	1.05		0.87	0.38
	1.78	0.87		0.76	0.6
	1.04	1.3		0.49	0.37
	0.85	1.3		2.25	0.34
	2.07	0.3		1.08	0.53
	1.4	1.65		0.49	0.59
	1.03	0.68		1.56	0.61
	1.19	0.92		1.37	2.39
	1.39	0.69		2.37	2.06
	1.34	2.73		0.93	1.33
	1.31	0.51		0.53	0.93
	2.67	0.99		1.24	2.09
	0.9	0.88		0.43	1.1
	2.86	1.19		0.64	2.91
	1.76	3.18		1.31	1.63
	0.75	1.59		0.39	0.73
	1.34	0.63		1.1	0.62
	0.51	1.86		1.09	0.65
	1.8	1.5		2.25	0.58
	1.02	0.98		0.9	0.61
	1.08	1.64		0.29	0.58
	1.3	0.98		0.45	0.66
	3.69	1.34		0.33	0.65
	0.41	1.26		0.45	0.46
	1.47	1.58		1.41	0.69
	3.19	2.09		1.16	0.64
	1.65	1.28		1.23	1.02
	1.9	1.96		0.5	1.15
	0.98	1.2		0.26	0.99
	3.33	1.43		0.91	1.82
	1.5	0.65		1.96	1.08
	1.48	1.65		0.1	2.02
	1.5	1.94		0.17	1.33
	0.78	0.97		0.88	0.73
	1.55	0.5		0.44	2.72
	1.06	1.57		2.91	1.71
	2.23	0.68		1.46	1.17
	1.79	0.4		0.37	2.25
	0.36	0.37		0.65	1.32
	0.34	0.95		1.04	1.51
	2.07	1.39		0.58	1.21
	1.23	2.31		2.11	0.89
	0.76	0.97		0.32	0.97
	1.43	0.91		1.01	0.54
	1.7	0.95		0.44	1.41
	1.15	0.73		0.43	0.81
	2.02	2.63		0.33	1.01
	0.91	0.64		0.17	1.44
	1.2	1.46		0.47	1.48
	1.44	0.64		1.13	1.47
	1.12	1.02		0.92	2.65
	2.02	0.58		1.16	2.06
	2.62	1.43		0.63	1.34
	0.87	0.54		0.44	2.73
	1.34	3.28		0.81	0.34
	2.48	0.5		0.82	1.5
	0.82	1.24		1	2.73
	0.49	1.13		1.91	1.03
	0.88	0.96		0.68	2.23
	1.37	0.39		0.42	1.5
	1.11	2.93		2.66	5.95
	1.99	1.07		0.71	1.91
	0.93	1.48		0.45	4.46
	0.88	0.71		0.39	4.08
	1.43	0.97		1.11	3.92
	0.58	0.45		0.37	1.89
	1.14	0.83		0.94	2.9
	1.2	1.29		0.31	2.04
	1.05	0.46		0.53	1.33
	0.75	2.06		0.4	2.92
	0.67	0.71		0.29	3.37
	1.6	1.65		0.32	1.93
	3.63	1.18		0.79	5.15
	1.06	0.75		1.03	2.16
	1.05	1.15		0.81	0.98
	1.03	0.51		0.14	0.81
	1.04	1.43		0.8	0.31
	2.45	0.58		0.59	1.09
	2.23	1.97		0.4	1.67
	1.04	1.84		1.45	1.1
	1.14	0.86		0.86	0.66
	2.6	0.31		2.1	1.85
	1.3	0.57		0.88	2.14
	1.51	0.45		0.32	1.33
	1.13	1.04		0.52	1.03
	0.89	1.21		0.77	1.13
	2.66	0.9		2.18	1.42
	3.06	1.41		2.45	0.8
	1.54	1.65		1.05	0.31
	3.57	0.9		0.88	1.06
	1.14	0.99		1.95	0.65
	0.96	1.14		1.12	0.89
	2.51	1.01		1.48	0.97
	1.02	1.71		0.37	1.06
	1.37	0.74		0.69	0.96
	0.7	1.32		1.21	0.8
	1.75	0.74		0.98	1.27
	0.91	0.33		0.9	1.39
	0.96	2.14		1.76	1.39
	1.06	1.43		0.95	1.8
	0.98	5.69		0.45	0.48
	0.57	0.57		0.37	0.36
	1.49	0.75		0.5	0.5
	0.72	0.88		0.67	0.72
	1.35	0.44		0.36	0.92
	2.76	0.59		0.75	1.08
	1.05	0.82		1.31	0.79
	1.1	0.38		1.4	1.06
	1.4	1.48		0.5	1.55
	1.06	1.18		0.92	0.6
	2.16	0.74		0.8	0.69
	1.1	1.2		0.37	0.6
	1.86	1.61		2.42	0.12
	1.7	0.78		1.5	0.93
	0.96	1.32		1.01	1.51
	1.19	0.5		0.12	1.73
	0.95	0.68		0.68	0.46
	1.81	1.12		0.85	0.55
	2.54	1.61		1.69	0.91
	0.61	1.47		1.52	0.95
	1.51	0.63		0.8	0.82
	1.45	1.1		1.28	1.26
	1.08	0.79		0.61	0.6
	1.71	0.83		0.38	0.76
	1.38	1.33		0.47	0.58
	0.85	3.21		1.94	1.19
	1.76	0.74		1.28	0.26
	1.66	0.28		1.77	0.33
	1.57	3.04		0.54	0.86
	1.24	0.44		0.59	0.84
	1.03	1.15		0.84	0.5
	0.87	0.87		0.72	1.03
	1.13	1.35		1.35	0.81
	1.21	2.15		0.52	1.09
	0.97	1.29		0.45	0.85
	0.51	1.42		0.83	0.82
	1.46	1.23		0.91	0.53
	0.98	0.71		0.54	0.64
	1.36	0.5		0.44	0.29
	1.04	2.97		1.35	0.44
	1.17	2.46		1.22	0.53
	1.22	0.99		0.95	2.76
	1.71	0.69		1.41	1.15
	1.7	1.1		2.1	0.96
	1.03	2.31		0.71	1.29
	1.93	1.76		1.57	0.65
	0.88	0.37		1.27	0.51
	1.02	1.17		7.02	0.51
	1.24	2.97		1.42	0.35
	2.44	1.09		0.79	0.74
	1.26	1.72		1.81	3.14
	1.22	0.39		3.16	0.45
	0.94	1.21		0.6	0.6
	1.16	0.57		0.74	0.64
	1.47	1.51		1.05	1.66
	0.52	0.43		1.69	0.76
	1.12	0.82		2.06	1.65
	1.74	1		0.32	1.19
	1.62	0.55		0.67	0.75
	1.2	0.75		1.13	0.96
	1.69	0.64		0.79	0.63
	1.57	1.72		0.93	0.51
	1.94	0.84		1.26	1.19
	0.61	2.73		1.04	0.49
	1.27	1.2		0.7	0.19
	1.81	2.99		0.83	0.84
	1.56	1.62		1.24	0.09
	1.17	0.26		1.74	0.61
	0.99	1.03		0.95	0.84
	1.12	1.11		0.67	2.38
	1.49	1.82		0.51	1.25
	1.38	0.83		0.9	0.69
	1.04	0.95		0.21	0.79
	0.96	0.7		1.51	0.23
	1.07	1.21		0.5	0.55
	2.61	1.05		0.84	1.07
	1.27	0.85		0.81	0.43
	1.4	1.43		1.42	0.52
	0.77	0.84		1.45	0.97
	1.19	1.63		0.72	0.45
	1.42	0.43		0.77	0.41
	1.55	4.6		0.9	0.44
	1.71	2.33		1.98	1.23
	1.02	1.01		0.87	0.98
	1.02	0.39		1.68	1.55
	1.2	1.86		1.57	0.77
	1.79	0.74		1.02	0.77
	2.14	1.37		1.31	0.53
	1.62	2.45		1.07	0.28
	1.15	1.09		0.79	0.94
	1.17	0.41		1.55	0.67
	1.27	0.64		0.64	0.8
	1.28	2		1.09	0.41
	1.36	0.59		0.77	0.5
	2	1.26		1.79	1.76
	0.83	1.33		1.6	0.89
	2.45	0.7		0.48	1.41
	0.7	1.02		1.13	0.49
	0.74	0.36		0.8	2.05
	1.17	0.62		1.1	1.23
	3.22	1.49		0.56	0.3
	1.05	1.2		1.64	1.04
	1.08	1.13		1.05	0.82
	1	1.14		0.75	0.37
	1	0.41		1.4	0.91
	1.58	1.78		0.52	0.91
	0.97	1.48		0.95	0.6
	1.53	1.01		0.95	0.44
	1.03	1.19		1.65	0.47
	0.98	0.72		0.98	0.71
	0.93	0.88		1.61	0.67
	0.88	3.28		1.83	0.52
	1.03	1		0.71	0.92
	1.45	1.03		0.93	0.82
	2.61	1.08		1.38	0.43
	1.91	2.74		0.78	0.47
	1.92	0.88		1.19	1.71
	0.99	2.05		1.13	0.99
	0.89	0.86		1.01	0.25
	1.01	1.6		0.75	0.34
	1.64	3.07		2.19	0.59
	0.98	2.99		5.67	1.29
	0.47	1.12		1.02	0.55
	0.47	1.08		0.39	0.54
	1.37	3.2		0.94	1.66
	1.04	0.81		1.11	0.91
	1.2	1.46		1.08	1.25
	2.26	1.54		0.34	1.11
	1.05	4.22		0.69	0.89
	0.73	1.7		1.02	0.36
	1.03	2.07		1.04	2.51
	0.62	1.83		1.41	1.41
	0.92	1.1		1.64	0.65
	0.52	2.48		0.87	0.8
	1.58	1.32		1	0.84
	1.08	1.38		0.46	0.74
	0.97	1.76		0.6	0.73
	1.19	0.5		0.79	0.68
	0.52	1.39		0.95	1.95
	1.39	0.83		0.92	1.51
	1.26	1		1.47	1.2
	1.29	1.03		1.12	0.18
	0.65	0.82		0.46	0.44
	1.49	0.88		0.46	0.54
	1.43	0.89		0.35	1.04
	1.8	0.99		0.62	1.13
	0.73	2.56		0.94	0.76
	0.75	2.14		1.58	0.71
	1.36	0.98		0.21	0.82
	1.2	0.91		0.57	0.68
	1.31	1		1.55	0.58
	1.1	1.13		0.34	1.02
	1.57	0.48		0.56	0.84
	0.9	1.07		0.46	0.73
	1.3	1.04		2.47	1.21
	0.85	0.49		3	1.12
	1.31	0.75		1.87	0.96
	0.94	1.25		0.29	0.73
	0.89	1.53		1.01	0.62
	0.97	0.43		1.29	0.67
	1.19	1.63		1.64	1.02
	0.96	0.82		0.71	0.87
	1.03	0.58		0.29	0.12
	1.88	1.52		1.53	0.62
	1.35	1.07		1.3	1.27
	1.07	1.33		1.33	1.27
	1.43	1.1		2.47	0.74
	1.83	1.42		0.94	2
	0.81	1.89		0.85	1.56
	1.5	2.44		1.29	0.32
	1.57	1.99		0.56	1.38
	1.09	0.42		0.7	0.49
	1.13	0.81		0.45	0.78
	1.31	0.87		2.55	0.39
	1.04	3.34		1.25	0.95
	1	0.46		0.58	0.5
	1.04	1.44		1.16	1.23
	2.94	1.78		1.09	0.58
	0.46	0.83		0.33	0.41
	1.22	1.25		0.67	0.23
	1.2	1.03		0.67	0.23
	0.86	1.6		0.87	0.43
	0.93	0.38		1.46	0.24
	0.91	1.08		1.51	0.32
	0.77	1.19		1.5	1.54
	1.14	0.69		1.79	0.24
	1.52	2.06		1.5	0.09
	1.04	0.45		0.46	0.36
	1.73	1.32		3.18	0.24
	1	1.17		0.32	2.35
	0.99	1.07		1.07	0.91
	0.34	0.69		1.91	1.62
	1.07	1.96		1.6	0.6
	0.96	1.49		0.77	0.37
	1.92	1.43		0.91	0.59
	0.46	1.3		0.39	0.59
	0.77	2.24		1.8	1.79
	1.42	1.48		0.56	0.94
	0.79	1.11		0.44	1.27
	1.24	1.15		0.57	0.31
	0.87	1.3		2.35	1.01
	0.51	1.2		1.12	0.48
	1.62	0.61		1.66	0.45
	0.88	1		1.82	0.65
	1.09	1.23		0.33	0.39
	1.01	0.65		1.38	0.4
	2.38	0.56		1.79	0.99
	1.24	1.03		1.41	0.82
	1.35	1.4		1.72	0.51
	0.97	1.33		0.67	0.67
	1.64	1		0.7	0.95
	0.35	0.89		1.74	0.25
	1.94	1.4		2.2	0.52
	0.87	1.61		1.83	0.34
	1.32	0.99		1.67	0.37
	1.13	1.09		1.27	1.18
	2.04	1.24		2.15	1.99
	0.41	2.73		2.37	0.56
	0.77	1.96		1.8	0.86
	1.51	1.03		1.63	0.35
	0.88	0.93		2.03	0.31
	1.26	3.26		1.51	0.4
	0.46	0.5		0.87	0.37
	1.25	1.42		1.85	0.89
	1.03	1.42		1.15	0.46
	1.83	0.98		1.84	0.31
	0.79	2.27		0.84	0.94
	0.46	2.01		1.92	1.2
	1.85	0.98		1.54	0.13
	1.07	3.87		1.17	0.41
	2.1	2.13		1.16	0.46
	1.03	0.9		0.56	0.35
	1.11	0.88		2.99	0.79
	1.86	1.73		5.94	2
	0.81	1.93		1.19	0.25
	0.91	1.06		3.66	1.23
	1.52	0.72		0.49	0.13
	1.02	1.64		0.37	1.16
	1.68	1.96		1.96	0.78
	1.63	1.09		1.11	1.19
	1.72	2.31		4.14	0.22
	0.61	2.2		1.28	1.04
	1.02	1.04		1	0.81
	0.63	1.25		0.47	0.99
	0.5	1.08		3.39	0.47
	1.45	1.21		1.03	0.25
	1.04	1.67		0.67	0.5
	1.23	2.18		1.34	0.77
	0.97	3.39		3.75	1.35
	1.01	0.71		0.33	0.85
	0.73	1.73		1.88	0.18
	1	0.96		0.77	0.95
	2.02	1.51		0.36	0.28
	1.69	2.16		1.62	0.49
	2.56	1.05		0.85	1.25
	1.46	1.38		2.03	0.36
	1.16	0.88		0.97	0.49
	0.78	0.99		2.14	1.17
	1.76	1.68		1.47	0.42
	1.23	0.69		1.16	0.78
	1.55	0.72		0.88	0.78
	1.09	0.89		0.74	0.75
	1.71	1.71		0.89	0.77
	1.42	1.45		2.27	0.4
	0.98	1.37		0.93	0.55
	1.01	1.45		0.6	0.5
	0.51	0.95		1.21	0.43
	1.13	1.41		2.89	1.33
	1	1.34		2.59	1.05
	0.95	1.14		1.37	0.46
	1.7	2.63		1.83	0.22
	1.21	1.11		1.2	0.41
	0.81	2.26		2.72	1.49
	2.09	1.53		7.78	0.18
	1.01	0.45		3.45	0.38
	1.25	0.96		1.94	0.29
	0.97	0.84		0.85	0.45
	0.65	2.08		1.93	0.8
	2.05	1.05		1.87	1.01
	1.24	0.37		1.1	0.81
	2.45	1.78		1.43	0.31
	1.21	1.13		1.94	0.51
	1.79	1.29		2.04	0.78
	1.34	1.17		1.7	1.07
	0.33	1.6		0.95	0.26
	1.45	0.58		0.86	0.86
	1.22	0.96		0.66	1.03
	0.89	1.21		1.53	0.87
	0.61	1.21		1.13	0.88
	0.81	0.89		0.87	0.72
	0.88	1.28		0.76	1.12
	0.91	1.34		1.17	0.38
	1.09	1.3		0.35	0.29
	1.52	1.08		0.45	0.87
	0.49	1.32		1.99	0.46
	1.96	0.94		1.29	0.58
	0.91	2.19		1.24	0.52
	0.76	1.53		1.47	0.47
	0.72	1.31		0.64	0.16
	0.79	1.1		1.65	1.2
	1.08	1.1		0.36	0.74
	1.09	1.04		0.1	0.52
	0.65	0.95		1.64	0.95
	1.69	1.8		2.27	1
	0.99	0.81		1.23	0.36
	2.54	1.79		1.76	0.28
	1.48	2.41		1.96	1.44
	1.65	0.77		2.46	0.44
	1.32	1.33		0.83	1.03
	1.27	1.27		8.05	1.34
	1.06	1.3		0.51	0.58
	0.8	0.66		2.24	0.35
	0.93	2.74		1.3	0.48
	0.97	1.21		0.97	1.05
	0.93	0.46		0.98	0.71
	1.59	0.71		0.92	1.66
	1.02	3.38		0.44	0.89
	1.5	2.11		0.83	0.1
	1.15	4.27		1.23	1.55
	0.8	1.3		2.14	0.46
	1.1	1.38		0.96	0.95
	1.5	0.56		2.86	1.17
	0.69	1.85		0.86	0.92
	1.12	1.05		1.62	1.33
	0.81	1.32		1.56	1.7
	1	1.07		2.18	0.62
	1.04	1.06		0.72	0.43
	0.6	1.79		0.9	1.41
	0.98	0.92		1.05	0.93
	2.75	0.89		0.94	0.82
	1.46	0.5		0.37	0.77
	0.91	1.43		1.3	1.03
	1.02	1.22		1.15	0.48
	1.17	1.53		1.54	0.51
	0.97	2.73		0.89	0.97
	0.44	0.71		1.01	1.58
	1.25	1.27		0.89	0.42
	0.38	1.17		2.01	1.14
	1.77	1.65		1.4	1.45
	1.25	1.35		1	1.43
	1.44	1.13		2.44	0.56
	0.88	0.98		1.77	0.6
	0.9	0.82		1.4	0.45
	1.92	1.65		1.69	0.88
	1.15	1.14		0.55	4.19
	0.95	0.87		1.05	1.21
	0.68	1.32		1.31	0.18
	0.64	0.66		3.18	0.77
	0.72	1.01		3.86	0.78
	1.06	2.18		0.53	0.39
	1.68	0.94		0.75	0.81
	1.78	1.05		1.13	0.35
	1.14	1.14		1.45	0.52
	1.27	0.65		1	0.34
	0.64	1.63		1.43	0.7
	0.99	1.24		1.9	0.95
	1.96	1.29		2.98	0.37
	0.6	0.94		0.6	0.68
	1.61	1.14		3.17	1.23
	0.52	1.23		1.41	0.64
	1.46	0.86		1.97	0.19
	1.69	1.72		1.19	0.35
	0.78	0.62		2.09	0.49
	1.54	1		0.52	1.98
	0.53	1.37		4.23	2.46
	1.5	1.42		1.48	1.35
	1.1	1.21		2.28	0.6
	1.1	1.96		0.76	2.06
	1.38	0.85		2.07	0.34
	1.01	2.16		2.08	0.61
	1.24	2.08		1.07	0.32
	0.88	0.74		1.26	1.36
	0.58	1.04		0.54	0.39
	1.12	1.77		0.75	1.18
	1.01	0.56		1.32	1.1
	2.36	0.93		2.5	0.93
	0.7	1.09		1.12	0.37
	1.04	0.76		2.27	1
	1.81	1.27		2.39	1.1
	1.41	1.84		0.49	0.39
	0.85	1.1		2.62	1.64
	0.95	1.55		1.36	0.68
	1.37	1.01		2.28	0.61
	0.85	1.57		1.23	0.66
	0.97	1.3		0.85	1.23
	1.25	1.08		0.43	1.17
	1.68	0.96		1.51	0.36
	1.13	0.6		4.36	0.83
	1.19	0.98		1.49	1.59
	3.04	0.75		1.64	0.24
	0.5	1.67		1.81	1.02
	1.09	0.76		2.27	1.03
	1.14	1.19		1.29	0.34
	2.24	1.29		0.93	2.28
	1.22	0.8		4.31	0.35
	0.4	0.29		1.28	0.95
	0.79	1.46		1.34	2.3
	1.01	1.34		2.78	2.73
	0.82	0.91		1.23	0.86
	1.18	0.73		4.44	1.38
	1.32	0.53		1.42	1.51
	1.39	0.76		3.18	0.41
	1.12	1.18		2.03	1.25
	2.34	1.24		2.51	0.74
	1.17	1.14		2.76	0.34
	1.21	1.02		0.97	2.71
	1.05	0.96		2.03	1.07
	0.91	1.05		0.85	0.47
	2.27	2.17		2	1.1
	1.44	1.31		3.27	1.03
	1.29	0.51		2.2	1.71
	2.63	2.55		1.65	0.88
	0.94	1.19		0.62	1.17
	1.82	1.96		0.85	0.35
	1.53	1.51		1.17	1.36
	2.07	2.58		2.93	0.93
	1.01	1.44		2.49	1.2
	0.88	1.67		4.11	0.88
	1.56	1.08		1.28	2.86
	1.01	3.74		1.67	1.3
	0.95	1.52		0.66	2.05
	1.61	1.45		2.54	1.36
	1.17	0.77		1.96	0.63
	1.02	0.9		2.59	1.35
	0.53	1.4		1.73	0.41
	0.92	1.28		5.37	0.88
	1.43	1.81		1.86	1.65
	1.42	0.82		0.84	1.08
	1.02	1.83		2.2	0.48
	1.1	1.22		1.26	0.37
	1.23	1.99		1.01	0.99
	3.39	1.18		3.17	0.86
	0.72	1		0.15	2.41
	1.2	0.72		3.11	1.16
	1.08	1.14		1.87	0.53
	1.39	1.54		1.64	0.42
	0.91	2.97		0.43	2.04
	2.06	0.15		0.45	1.23
	1.13	1.06		1.64	5.46
	0.74	2.49		1.73	2.23
	0.83	0.85		1.04	1.38
	2.44	1.03		1.05	3.24
	1.32	0.96		0.75	2.44
	0.92	1.09		0.7	2.64
	1.28	0.71		0.96	0.73
	1.12	1.1		0.99	1.14
	0.51	0.53		1.14	1.66
	0.78	0.8		0.33	1.44
	1.27	1.13		1.2	1.37
	1.58	0.81		1.33	1.17
	0.98	0.69		1.07	3.18
	0.83	0.96		2.15	0.98
	1.53	1.03		1.11	2.42
	0.91	1.1		1.03	0.78
	0.45	3.32		1.1	1.04
	1.07	0.47		1.73	1.32
	0.58	0.71		1.27	0.93
	0.98	1.21		1.43	1.19
	1.21	1.06		0.97	1.34
	1.24	0.66		1.49	1.28
	1.43	0.83		1.57	1.1
	1.18	0.73		0.98	1.37
	2.29	0.69		1.48	0.85
	1.69	1.35		0.75	0.76
	2.12	0.83		1.07	1.16
	1.35	0.92		1.3	2.84
	1.84	1.48		1.18	1.47
	0.76	0.64		2.24	0.38
	1.76	0.84		0.32	0.6
	0.5	3.89		1.96	1.23
	0.75	0.56		0.66	1.25
	0.56	1.14		1.97	1.05
	1.38	0.71		0.73	1.26
	1.51	1.13		1.4	1.94
	1.33	1.66		1.47	1.11
	0.66	0.71		0.12	0.9
	0.67	1.14		0.4	2.01
	1.6	1.14		0.2	1.63
	1.43	1.72		2.06	2.53
	1.1	1.45		0.83	0.38
	0.95	1.03		0.49	3.12
	0.78	0.8		1.49	4.31
	1.4	1.35		0.75	2.27
	1.17	3.17		1.53	2.67
	1.67	0.93		0.89	0.71
	0.98	0.47		1.38	0.73
	0.51	2.04		0.91	1.67
	0.85	0.67		0.29	0.6
	1.24	1.82		0.66	1.17
	1.44	1.03		0.87	1.57
	1.97	1.16		0.74	1.83
	1.45	1.37		0.92	1.53
	1.31	2.17		1.7	1.63
	0.85	1.33		1.09	1.21
	1.09	1.03		1.69	1.96
	1.2	0.94		0.47	2.97
	1.43	2.25		0.28	2.52
	1.75	1.04		0.96	1.59
	1.4	1.75		0.68	0.96
	1.78	0.93		0.51	0.99
	1.38	1.04		0.29	1.84
	2.05	1.18		1.88	0.64
	1.6	0.59		1.09	1.83
	1.69	1.44		0.46	1.12
	2.91	1.37		2.06	1.18
	2.07	1.28		0.54	0.91
	1.96	1.4		0.47	1.02
	2.25	1.18		0.37	0.6
	1.82	1.92		1.7	2.58
	0.58	1.39		1.4	0.66
	2.19	1.42		0.98	1.94
	5.02	2.27		0.66	0.44
	0.72	1.04		0.48	0.53
	1.98	1.01		0.97	0.62
	2.05	0.82		1.92	1.64
	1.79	1.07		0.95	1.24
	1.46	0.52		1.52	0.24
	1.9	2.2		0.69	0.98
	0.96	1.84		2	0.64
	1.4	2.22		0.27	0.68
	1.49	0.41		1.02	1.15
	1.18	0.12		0.83	0.36
	1.25	2.39		0.99	0.54
	1.06	0.68		0.11	0.82
	2.72	0.98		0.32	0.96
	2	2.48		0.27	0.93
	1.2	1.54		0.7	1.34
	4.37	0.9		0.3	2.98
	0.9	2.93		2.95	0.45
	1.87	1.1		1.23	1.27
	1.09	1.37		1.54	0.87
	1.05	0.89		0.92	0.52
	1.45	0.79		0.37	0.85
	1.2	0.61		1.12	1.04
	2.24	1.59		0.59	0.92
	1.22	0.77		1.64	0.6
	1.8	3.36		0.4	1.03
	1.65	0.73		0.94	0.43
	1.81	0.29		0.37	0.86
	1.6	0.99		0.47	0.89
	1.29	1.87		1.03	0.85
	1.06	0.8		1.97	1.08
	2.25	1.88		0.97	0.17
	0.67	1.85		0.72	0.84
	1.55	1.37		0.17	0.47
	1.02	1.65		0.25	0.79
	2.17	1.27		1.27	0.8
	1.28	1.83		0.25	0.42
	1.56	0.95		2.27	0.87
	1.23	0.96		2.5	0.52
	1.87	2.43		1.59	0.48
	2.49	1.34		0.5	0.69
	1.12	2.19		1.25	0.51
	1.92	1.5		1.02	0.11
	0.92	1.1		0.33	1.59
	1.06	1.17		1.04	0.49
	0.53	3.07		0.87	0.29
	0.74	1		0.79	0.43
	0.99	1.79		0.47	1.46
	1.3	1.63		1.51	0.5
	1.45	1.61		0.4	0.42
	0.74	0.47		1	0.33
	1.42	0.72		0.75	0.91
	0.87	1.61		0.82	0.52
	2.18	1.74		0.46	0.43
	2.05	2.97		1.52	1.01
	0.75	1.07		0.48	1.24
	2.14	1.28		0.99	0.99
	2.14	1.46		0.89	0.26
	0.97	1.22		0.5	0.23
	2.69	0.91		0.9	0.87
	0.5	0.79		0.74	1.22
	6.51	1.09		1.36	0.35
	1.02	1.08		0.36	1.59
	1.02	1.27		1.52	0.39
	2.02	1.71		2.55	1
	1.06	0.48		0.74	0.66
	1.53	1.44		0.63	0.44
	2.71	1.21		0.64	0.42
	3.91	0.82		0.37	0.25
	1.02	0.58		1.28	0.41
	9.65	0.56		1.06	0.47
	1.77	0.49		0.78	0.59
	1.82	0.48		1.01	0.37
	3.26	0.49		1.14	0.83
	2.28	0.63		2.09	0.53
	1.51	0.62		0.06	0.99
	1.16	0.71		0.76	0.86
	8.77	0.66		0.96	0.67
	4.24	0.57		0.46	0.92
	1.81	1.07		2	0.31
	0.65	1.81		2.93	0.87
	4.16	1.63		1.26	0.38
	2.18	2.61		1.63	0.48
	2.1	2.4		0.96	0.63
	1.37	0.67		0.42	0.24
	4.53	0.85		1.43	0.37
	2.35	1.31		0.48	1.01
	1.83	1.51		0.74	0.45
	1.61	1.04		1.7	0.51
	1.69	1.96		1.89	1.07
	1.11	1.31		1.31	0.49
	1.01	2.55		0.95	0.39
	1.37	1.24		0.83	0.5
	1.38	1.55		1.31	0.52
	1.87	1.15		0.33	0.98
	1.29	1.75		1.82	0.77
	2.02	2.16		1.45	0.95
	1.01	1.41		0.39	0.59
	1.23	1.78		3.45	0.44
	1.74	1.04		2.62	0.49
	2.97	0.68		1.59	1.04
	2.22	0.73		2.77	1.9
	3.22	1.26		0.49	0.34
	1.39	0.79		0.93	0.21
	2.28	2.19		0.45	0.87
	2.85	1.28		1.82	0.39
	0.93	1.9		0.84	0.62
	1.33	0.5		2.65	0.66
	1.51	1.19		0.36	1.46
	1.87	2.77		0.41	1.12
	0.8	1.23		0.36	0.35
	3.15	1.15		2.34	1.73
	0.79	1.58		0.76	0.56
	2.15	1.8		0.35	0.73
	1.69	2.9		0.4	0.18
	0.93	1.21		1.03	0.45
	1.5	3.69		2.47	1.03
	1.16	1.02		0.44	0.6
	1.35	2.56		1.11	0.26
	1.58	0.64		0.93	0.58
	0.98	1.19		0.49	0.83
	1.23	1.68		0.99	0.2
	0.92	1.7		0.38	1.18
	1.13	1.4		1.85	0.32
	1.42	1.61		0.31	0.34
	2.78	0.7		3.17	0.36
	2.01	0.97		0.94	0.79
	0.54	0.85		0.96	1.09
	1.26	0.92		0.95	0.6
	1.34	1.07		0.27	0.88
	2.4	0.81		2.47	0.76
	2.19	1.07		0.49	0.91
	2.16	0.46		2.58	0.83
	1.79	1.02		0.71	0.37
	1.09	0.78		1.11	0.8
	1	2.91		0.42	0.45
	1.43	1.74		0.36	1.06
	1.35	0.68		1.22	0.87
	1.06	0.74		1.68	0.4
	0.38	0.32		1.08	0.45
	2.63	0.61		0.87	0.08
	2.06	0.55		0.19	0.83
	1.48	2.1		1.35	0.54
	0.83	0.99		0.33	1.13
	1	2.19		1.1	0.12
	1.27	0.78		0.88	1.05
	1.34	0.99		1.3	0.45
	1.16	1.02		1.55	0.36
	1.31	1.68		0.47	1.69
	1.5	1.65		0.41	0.25
	1.02	1.35		1.18	0.35
	1.34	1.85		0.55	0.49
	2.31	0.96		1.75	2.02
	0.98	1.36		0.68	0.31
	1.83	3.28		1.2	0.44
	1.72	1.29		0.72	0.37
	1.96	2.36		0.39	0.24
	1.18	0.8		1.01	1.21
	2.27	1.06		0.82	0.42
	1.75	2.42		1.68	0.24
	1.05	0.81		0.65	0.41
	2.42	0.76		2.85	0.44
	1.22	0.86		0.91	0.89
	1.89	0.45		0.72	0.54
	1.15	0.54		0.77	1.39
	2.11	1.05		1.97	0.28
	2.55	1.33		0.66	1
	0.98	1.39		1.33	0.28
	0.99	0.92		1.02	0.59
	1.27	1.64		0.33	1.07
	1.33	2.18		0.44	0.86
	1.29	0.75		0.79	0.28
	2.3	1.02		0.63	0.86
	1.36	1.91		0.39	0.27
	1.01	1.29		0.91	1.02
	1.73	1.66		0.94	1.75
	1.05	2.48		0.55	0.3
	1.8	0.6		0.96	1.26
	0.87	3.22		1.35	0.13
	1.03	0.67		0.98	0.33
	0.9	0.86		0.57	0.23
	1.73	1.75		1.63	0.79
	1.01	0.98		0.95	0.2
	1.11	0.96		1.22	2.85
	0.81	0.37		0.72	0.92
	1.29	0.4		0.72	0.47
	1.87	0.52		1.31	0.4
	1.43	1.72		0.38	0.36
	1.91	2.56		0.53	0.93
	1.81	0.37		0.47	0.38
	1.95	0.84		0.53	0.33
	2.06	0.63		0.73	0.56
	2.13	0.73		0.86	0.12
	0.53	1.23		1.09	0.82
	2.12	1.55		1.59	0.28
	2.61	1.71		0.68	0.23
	0.9	0.78		0.91	1.53
	1.38	0.89		0.19	1.08
	1.16	2.65		0.5	1.96
	1.38	1.48		0.35	0.97
	3	1.37		1.18	1.04
	0.8	0.96		1.17	0.34
	1.54	0.41		0.37	0.58
	0.85	1.07		1.18	1.23
	2.03	1.01		0.77	1.6
	2.41	1.24		0.51	0.69
	1.93	0.34		0.89	1.03
	0.8	1.08		0.8	0.37
	1.02	0.9		0.74	1.08
	1.64	1.24		0.97	0.36
	1.15	1.2		1.38	0.39
	0.94	2.56		0.89	1.49
	1.59	1.09		0.69	1.05
	1.61	0.98		1.36	0.64
	0.94	0.23		0.87	0.69
	2.75	0.59		0.66	1.18
	1.88	1.16		0.36	1.83
	2.74	2.03		2.14	0.64
	4.06	1.49		0.44	0.51
	0.99	0.55		1.11	0.37
	1.08	0.55		0.92	0.8
	1.18	1.03		1	0.41
	0.95	1.37		0.19	0.93
	1.91	1.5		0.86	0.94
	1.34	2.01		1.22	0.81
	1.07	0.89		0.49	0.46
	0.82	1.55		1.09	0.49
	1.14	2.76		1.08	0.96
	2.86	1.13		0.48	0.56
	1.19	2.34		1.02	0.98
	1.12	1.09		0.88	1.18
	1.68	1.97		1.41	0.21
	0.46	0.33		0.67	1.24
	1.01	0.84		0.36	1.06
	2.23	1.38		0.35	0.67
	1.4	1.61		1.01	1.05
	1.47	1.15		0.63	0.94
	1.44	1.26		1.25	0.48
	2.47	1.13		1.18	1.01
	1.13	0.9		1	0.83
	1.32	0.71		2.7	1.04
	1.32	1.54		1.63	0.61
	1.7	1.46		1.05	0.37
	1.21	1.22		0.43	0.26
	0.9	2.21		0.45	2.03
	0.48	1.12		0.66	0.9
	1.01	0.98		2.01	1.1
	0.66	0.82		0.36	0.4
	1.61	1.8		1.21	1.2
	2	0.63		0.43	1.76
	2.32	0.66		0.33	0.46
	2.02	0.12		0.85	2.1
	2.05	1.77		0.88	0.89
	1.81	0.79		0.78	0.44
	0.95	0.66		1.03	0.47
	0.91	0.94		1.35	0.45
	1.48	2.25		1.49	0.39
	1.2	1.05		1.3	2.02
	1.18	0.61		1.67	1.36
	1.66	0.98		1.72	0.7
	1.25	1.57		0.94	0.61
	1.04	1.03		1.03	0.28
	1.24	0.44		0.29	1.51
	1.65	0.93		0.77	0.73
	1.47	0.9		0.53	0.51
	2.34	1.97		1.11	1.5
	1.09	0.48		2.03	0.5
	1.5	0.47		1.19	0.85
	1.4	2.26		0.44	0.3
	1.37	0.92		1.65	0.89
	1.09	1.04		1.18	0.82
	1.06	1.61		1.01	0.68
	1.5	0.76		0.1	0.31
	0.75	2.41		1.02	0.35
	1.39	0.51		0.76	0.29
	1.74	1.63		0.58	0.06
	1.75	1.53		0.98	0.41
	0.65	0.46		0.39	0.35
	2.3	1.19		0.33	0.43
	1	0.59		2.02	0.27
	0.93	0.84		1.02	0.36
	1.18	1.52		0.44	0.64
	2.19	0.28		2.64	0.47
	0.88	0.53		0.89	1.4
	1.61	4.28		0.98	1
	1	1.68		1.7	1.25
	2.5	1.23		0.94	1.23
	1.29	1.12		0.32	0.21
	0.87	0.57		0.54	0.13
	1.1	0.79		0.5	1.17
	1.18	1.14		0.46	0.48
	0.7	0.8		0.51	0.73
	2.13	1.69		1.35	0.69
	1.93	0.45		0.45	0.33
	1.61	2.32		1.13	0.18
	2.48	2.2		1.06	1.19
	1.02	1.84		1.39	0.12
	0.77	1.86		1.29	1.03
	1.16	1.26		2.64	0.36
	0.42	1.68		1.84	2.86
	2.61	0.41		1.3	1.13
	0.77	1.64		0.92	0.74
	0.53	0.79		0.9	0.92
	0.79	0.8		0.69	0.91
	0.69	0.97		0.89	0.44
	1.02	0.32		0.54	0.34
	2.04	1.03		0.83	0.86
	1.31	0.79		0.38	0.31
	0.91	1.61		0.92	0.96
	1.42	3.34		1.46	0.96
	1.27	0.94		1.45	1.25
	0.49	1.13		0.61	0.47
	2.13	0.85		1.91	1.17
	0.6	1.31		0.53	0.61
	0.86	0.97		0.76	0.77
	2.8	1.97		1.44	0.26
	1	3.01		1.36	0.69
	1.3	0.94		0.91	0.89
	1.38	2.28		1.05	0.32
	1.06	2.01		1.22	0.26
	1.26	1		0.53	2.16
	1.89	2.82		0.77	1.88
	0.82	2.54		1.55	0.29
	2.93	1.64		0.66	0.67
	1.14	1.93		0.98	1.23
	1.22	1.58		0.86	0.36
	1.68	1.06		2.16	0.79
	0.77	0.96		0.53	0.37
	1.86	2.3		1	0.74
	0.89	1.72		0.84	0.83
	1.6	1.03		0.53	0.63
	1.06	0.79		0.38	0.34
	1.09	1.84		0.98	1.68
	0.92	0.71		0.84	1.28
	1.95	1.13		0.86	0.72
	1.13	2.13		0.5	0.75
	0.94	1.19		1.1	1.67
	1.44	1.75		0.68	1.81
	1.49	0.54		1.08	2.15
	1.43	1.11		0.49	1.58
	1.11	0.6		0.6	0.8
	1.37	0.91		2.28	0.88
	1.68	0.98		2.59	0.65
	1.38	1.06		0.5	1.2
	1.04	0.88		1.86	1.39
	1	1.51		0.96	1.05
	1.35	2.82		0.86	0.71
	1.34	1.76		0.27	1.85
	0.96	2.39		1.4	0.51
	0.44	0.55		0.71	0.95
	1.89	1.92		2.32	2.11
	2.28	0.97		0.74	0.89
	2.14	1.16		1.1	2.46
	0.82	1.94		1.01	0.8
	1.8	1.16		0.97	1.06
	2.66	3.61		1.53	0.37
	1.11	0.47		1.2	1.42
	1.08	0.35		2.3	2.02
	0.52	1.44		0.96	1.11
	0.92	0.96		2.69	1.74
	0.39	2.02		1.15	4.06
	1.35	1.36		0.64	1.88
	2.79	0.62		0.56	0.69
	0.74	1.56		1.25	0.95
	1.13	1.1		0.35	0.76
	0.82	0.85		1	0.47
	2.28	1.96		1.33	0.55
	2.89	1.34		0.96	0.96
	2.98	2.41		0.71	1.31
	1.26	1.18		0.8	1.28
	1.29	0.68		1.08	0.57
	1.19	1.54		1.25	0.36
	0.43	1.14		0.26	0.57
	0.84	1.02		0.3	1.2
	1.3	1.02		0.47	0.98
	0.98	1.49		0.39	1.02
	0.86	1.52		1.78	0.27
	0.85	0.56		3.62	1.23
	1.4	2.02		1.52	0.75
	1.44	0.92		1.33	0.51
	1.59	0.64		1.38	0.54
	1.73	1.56		0.35	1.59
	0.76	1.51		0.93	2.37
	1.05	1.36		0.15	0.59
	1.73	1.88		0.34	0.5
	1.44	1.5		1.08	0.3
	1.93	1.22		0.95	1.67
	1.04	0.69		0.84	0.45
	1.93	0.51		0.68	1.31
	1.78	1.2		3.76	0.86
	0.91	2.59		0.53	1.06
	1.03	1.26		1.26	0.88
	0.71	0.35		0.94	0.63
	0.99	0.77		0.22	0.63
	0.85	3.57		0.49	0.4
	0.82	1.43		0.81	4.47
	1.02	0.94		0.95	0.41
	0.92	0.67		0.65	0.79
	1.16	1.4		1.01	1.61
	1.96	0.38		3.46	0.32
	2.16	0.44		1.91	0.35
	1.26	1.34		0.67	1.01
	0.85	0.54		0.43	0.37
	1.31	1.1		1.2	2.81
	1.43	1.37		0.49	0.46
	2.83	0.51		0.89	2.47
	1.56	1.28		0.97	0.32
	1.11	0.91		0.41	1.28
	1.61	2.12		0.88	0.51
	0.88	0.58		1.34	0.44
	1.38	0.7		0.77	1.25
	0.77	2.49		0.75	0.83
	1.07	1.58		1.86	0.96
	0.51	3.24		1.91	2.9
	0.91	0.89		0.84	0.51
	0.77	1.1		0.5	0.27
	0.51	0.26		1.39	1.14
	1.54	0.41		0.28	1.13
	0.9	0.6		1.31	0.37
	1.62	1.69		0.19	1.07
	0.92	1.13		1.62	0.84
	1.04	0.73		1.24	0.21
	1.48	0.96		1.21	1.6
	0.65	0.62		0.84	1.33
	0.77	1.07		0.86	2.82
	1.06	0.97		0.86	1.24
	0.79	0.46		2.12	1.45
	1.53	0.43		1.17	0.72
	0.93	0.93		1.32	0.13
	0.95	0.92		1	0.56
	1.04	0.74		1.17	0.73
	0.82	1.01		1.09	1.06
	0.83	0.98		0.88	3.11
	0.85	0.4		1.03	0.34
	1.55	1.6		1.42	1.8
	1	0.43		0.27	1
	1.14	1.96		1.66	1.57
	0.89	0.24		0.64	1.19
	0.6	1.92		0.44	3.93
	1.95	1.17		0.87	1.42
	1.45	0.9		0.38	1.27
	1.25	2.57		0.71	1.35
	1.18	1.38		1.33	2.59
	0.48	0.52		1.6	0.36
	2.21	2.03		0.41	1.25
	1.45	0.47		0.25	0.25
	2.57	1.35		0.32	0.3
	1.02	0.9		2.58	1.13
	1.37	0.37		0.92	0.43
	1.56	1.57		1.01	1.36
	1.46	0.59		1.98	0.5
	1.46	0.68		1.36	0.37
	0.95	2.94		1.22	1.15
	0.73	1.56		0.87	0.87
	0.9	0.44		0.52	0.44
	0.48	2.09		2.9	1.07
	1.21	0.5		0.97	0.78
	1.08	0.95		0.41	0.39
	1.21	3.17		1.04	0.39
	0.7	1.51		1.72	0.63
	1.1	0.84		1.32	0.25
	1.55	1.1		0.87	1.07
	1.57	0.72		0.95	0.9
	1.86	1.62		0.97	0.67
	0.79	1.62		1.58	1.48
	1.03	0.33		0.34	0.36
	2.6	1.64		1.82	0.74
	1.06	1.15		0.62	1.28
	0.88	0.37		1.32	0.2
	1	1.19		1.83	1.12
	0.74	0.91		0.48	0.44
	1.22	0.89		0.44	1.24
	1.29	0.69		0.89	2.1
	1.02	0.37		0.78	0.99
	0.88	3.85		1.04	0.26
	1.4	0.96		0.6	1.23
	0.85	0.9		1.06	0.7
	1.35	0.48		0.35	2.01
	1.14	0.4		1.08	1.46
	1.91	0.97		1.66	0.57
	0.96	0.34		0.25	0.69
	0.87	1.2		1.8	1.22
	1.33	1.03		1.07	1.57
	1.67	0.32		1.42	1.35
	2.13	0.45		1	0.92
	0.93	0.95		0.63	0.98
	0.89	2.6		0.96	1.27
	1.56	2.16		0.41	2.77
	1.44	1.46		1.24	0.5
	1.02	0.79		0.73	1.25
	1.01	2.2		1.21	2.44
	1.05	1.03		0.65	0.76
	2.1	1.44		0.43	1.19
	1.21	1.83		0.76	0.56
	2.03	0.37		1.02	1.01
	1.45	1.68		1.1	0.46
	1.08	0.4		1.15	0.52
	0.74	0.64		1.78	1
	1.67	1.68		1.01	2.03
	1.06	1.39		0.78	1.63
	1.07	1.16		0.33	1.42
	0.77	1.52		1.99	2.16
	0.81	1.23		1.13	2.88
	2.1	0.62		1.17	4.34
	1.11	1.15		2.95	1.95
	1.15	0.65		0.77	1.58
	1.19	0.36		2.12	1.24
	1.12	1.28		0.89	1.76
	0.94	0.76		3.22	1.98
	2.33	1		0.96	1.46
	0.97	1		1.05	0.67
	1.23	1.97		0.95	3.23
	1.31	2.39		1.23	1.87
	0.82	0.79		3.73	1.27
	0.65	0.56		1.36	0.96
	1.69	0.74		1	1.26
	1.04	1.49		1.32	1.17
	1.97	1.11		1.96	2.58
	1.9	1.91		3.81	1.45
	1.96	1.17		1.55	0.88
	0.95	0.52		0.87	1.26
	1.32	0.54		1.22	0.68
	1.64	0.91		1.02	1.48
	0.4	0.86		0.87	3.24
	1.16	1.91		1.62	1.94
	0.95	2.02		1.03	1.37
	1.86	1.42		1.38	1.3
	1.01	1.22		1.15	0.84
	2.15	1.68		1.85	1.04
	1.09	0.91		1.25	1.86
	1.11	1.25		1.11	3.31
	0.64	0.64		1.35	1.02
	0.87	1.18		0.62	2.04
	0.99	0.51		0.69	1.29
	0.97	2.05		0.67	2.56
	0.5	0.52		1.26	1.06
	0.2	0.49		4.01	1.37
	1.46	1.08		0.7	1.16
	1.42	1		2.43	0.53
	1.19	0.79		1.23	0.82
	1.49	0.9		1.23	0.71
	0.88	1.92		2.49	1.04
	0.7	2.18		1	1.62
	1.69	0.57		0.4	1.2
	1.18	0.49		0.81	1.96
	0.93	1.27		2.32	0.44
	2	1.86		0.44	0.37
	0.95	0.49		1.06	1.01
	1.08	1		0.98	0.72
	2.19	2.64		0.35	0.76
	1.1	2.11		2.72	1.38
	1.22	1.04		2.84	1.04
	3.32	1.86		3.04	1.66
	0.97	1.27		0.83	0.75
	0.78	1.69		0.41	1.47
	2	1.82		1.28	0.67
	0.82	0.26		0.63	1.51
	1.01	0.63		1.42	0.44
	1.23	0.43		1.89	0.42
	0.57	0.72		0.65	0.62
	0.5	0.91		0.89	1.11
	1.38	0.74		1.48	0.89
	1.46	2.09		3.01	7.36
	0.95	0.69		1.99	0.64
	1.11	2.45		2.54	1.42
	1.43	1.25		1.03	0.61
	1.46	0.74		1.29	2.76
	0.65	1.47		1.17	0.76
	1.93	1.21		1.54	1.13
	0.79	1.78		1.68	2.31
	1.22	1.22		2.91	0.73
	1.04	1.08		2.03	0.08
	1.83	1.73		5.51	1.17
	1.21	1.94		1.08	2.02
	0.88	0.94		3.43	1.27
	1.6	1.67		1.22	2.06
	1.64	0.28		1.72	1.3
	1.02	0.76		0.84	0.89
	0.99	0.94		1.17	0.81
	1.06	2.05		1.01	1.08
	3.61	0.84		1.02	1.33
	1.59	0.68		2.19	1.27
	1.28	1.44		1.27	1.17
	0.93	1.53		1.63	0.44
	1.26	0.92		0.48	1.14
	0.78	1.31		0.41	1.02
	1.21	2.81		1.04	4.07
	1.94	1.09		1.24	3.33
	1.56	1.65		1.84	0.41
	1.02	1.13		0.9	1.02
	1.08	0.41		1.06	0.64
	1.64	1.53		1.04	1.95
	1.17	0.35		0.64	0.8
	1.27	1.13		0.96	1.03
	1.75	0.95		1.46	1.28
	1.06	0.81		1.11	1.54
	0.9	1.61		0.88	1.28
	1.68	0.9		0.49	1.48
	1.22	1.38		1.47	0.75
	0.84	0.51		1.28	1.47
	0.81	1.48		3.07	1.24
	1.04	2.72		0.77	0.45
	0.55	0.55		0.9	2.52
	1.85	0.49		1.16	0.51
	1	2.33		2.03	1
	0.44	1.27		0.4	1.13
	1.38	1.27		2.73	1.22
	1.08	0.58		1.17	0.99
	1.73	1.08		0.71	0.59
	1.17	1.9		1.45	2.08
	2.82	1.57		1.09	1.75
	0.71	1.4		1.51	0.42
	1.38	0.29		1.23	1.13
	0.77	0.9		0.44	1.01
	1.62	0.65		1.37	1.71
	2.02	1.31		0.92	1.28
	0.92	1.2		0.58	0.87
	0.92	1.4		1.5	0.84
	1.5	1.06		2.92	0.87
	1.02	1.02		1.87	1.79
	1.14	2.17		0.97	0.71
	0.81	1.31		2.8	0.83
	0.45	1.18		2.46	1.72
	1.08	0.7		0.76	1.62
	1.05	1.04		2.84	0.56
	0.95	0.67		2.84	1.14
	1.1	1.19		1.07	1.53
	0.55	2		1.87	3.02
	1.27	0.61		3.25	0.63
	1.22	1.58		0.96	1.14
	1.11	1.83		1.63	1.08
	1.33	0.84		1.61	2.12
	2.71	1.12		1.31	1.73
	1.4	1.57		4.99	0.43
	0.49	1.18		0.8	0.9
	0.6	1.16		1.36	0.45
	0.98	2.14		1.92	0.66
	0.7	0.57		3.82	1.23
	2.06	3.62		1.81	0.43
	0.83	3.17		0.78	0.44
	1.41	2.23		2.45	1.27
	1.23	2.74		2.08	0.98
	4.04	0.94		1.43	0.63
	1.79	1.16		1.49	0.47
	1.66	2.03		1.33	0.54
	2.05	0.51		2.69	0.57
	1.13	1.6		2.34	0.36
	1.4	0.33		1.4	0.71
	1.71	1.92		2.86	0.43
	1.21	2.33		7.96	1.33
	1.19	1.62		1.57	0.39
	1.04	1.66		1.25	0.85
	1.04	1.15		5.76	0.33
	1.64	1.33		2.99	0.53
	1.18	0.54		3.2	0.39
	1.12	1.36		2.71	3.15
	0.74	1.33		1.54	1.37
	0.92	0.91		2.09	0.59
	1.77	0.9		1.12	2.54
	4.08	1.5		2.71	0.41
	1.06	0.54		1.77	0.98
	2.48	0.51		1.39	0.76
	0.76	0.94		2.04	1.22
	1.33	1.82		1.5	1.5
	1.61	2.25		3.11	3.07
	1.42	1.5		1.57	0.52
	1.82	0.29		0.99	0.92
	2.52	1.44		1.24	1.64
	1.21	1.37		1.22	4.9
	1.18	0.93		0.83	1.28
	1.19	1.13		1.18	2.33
	1.73	1.38		0.77	2.1
	1.4	3.03		0.9	2.28
	2.76	5.48		1.16	2.22
	1.74	0.78		1.83	0.54
	0.96	0.63		1.63	0.4
	1.03	1.63		2.21	0.51
	2.76	2.03		1.65	2.41
	1.38	0.86		1.67	1.84
	1.01	0.29		1.21	1.03
	1.6	0.53		0.8	1.08
	6.8	2.17		0.5	1.9
	1.09	1.58		0.31	1.24
	2.55	2.42		1.24	1.42
	2.01	0.4		1.74	0.89
	1.67	1.05		0.82	0.81
	1.66	0.2		2.41	1.44
	1.72	1.03		1.2	4.7
	1.45	1.15		0.78	1.67
	0.62	1.61		0.65	0.42
	0.57	1.18		0.85	1.52
	1.87	1.51		0.62	1.41
	1.78	1.32		1.29	0.38
	1.17	2.42		0.29	1.94
	1.49	0.72		0.68	1.83
	0.98	0.43		0.74	0.47
	0.87	0.97		1.15	1.07
	2.93	0.63		1.66	1.19
	3.37	0.67		2.71	1.53
	2.12	0.36		1.44	1.67
	1.12	0.49		0.35	1.62
	0.93	0.84		0.78	0.53
	2.45	0.4		1.14	0.35
	2.05	1.48		0.97	1.62
	1.95	1.22		1.22	1.48
	1.18	0.56		0.48	1.56
	0.98	0.84		0.33	1.26
	0.58	0.97		0.78	0.7
	1.66	0.81		1.91	0.32
	1.33	0.98		0.55	1.03
	1.04	1.05		0.44	0.31
	0.21	1.36		0.79	0.28
	2.35	1.26		1.12	1.23
	1.29	1.98		0.7	0.98
	1.15	0.46		1.11	1.64
	0.87	0.41		0.65	0.59
	2.55	1.21		0.73	0.54
	1.93	1.24		1.37	1.66
	2.37	2.61		1.46	0.85
	1.19	0.67		1.17	0.99
	1.74	0.92		1.12	1.15
	1.32	0.61		1.17	1.9
	0.85	1.33		0.88	0.95
	0.92	0.93		1.16	1.15
	1.31	0.24		0.76	0.27
	2.28	1.76		0.41	0.45
	2.14	1.09		1.27	0.17
	1.07	1.42		1.4	0.82
	1.34	0.53		0.79	0.77
	1.11	0.9		0.89	0.99
	0.85	0.65		1.78	1.69
	1.95	1.21		1.02	0.38
	1.47	1.47		0.87	0.57
	1.57	0.93		1.36	0.96
	0.75	0.55		0.68	0.89
	1.96	1.53		0.87	3.02
	3.59	0.67		0.99	1.19
	1.01	1.47		1.83	1.3
	0.93	2.07		2.68	0.39
	0.69	1.67		0.55	0.43
	1.43	0.63		2.46	2.06
	5.42	1.11		0.52	0.98
	3.16	0.54		0.67	0.51
	2.84	0.35		1.45	1.12
	2	0.57		1.19	0.97
	1.09	2.11		1.26	0.4
	2.21	1.03		1.97	1.61
	1.62	0.36		0.44	1.65
	0.98	1.54		0.89	0.36
	1.45	1.21		0.42	0.46
	0.55	3.68		0.88	0.23
	2.01	0.7		1.56	1.07
	0.82	1.13		1.72	0.48
	1.1	0.47		0.6	1.14
	0.99	0.46		2.11	1.02
	2.58	1.79		0.72	1.16
	1.42	1.2		0.35	0.87
	1.28	0.61		0.11	0.5
	2.29	1.54		0.47	0.77
	1.7	1.39		0.92	0.43
	0.93	1.27		0.52	0.6
	2.21	1.82		1.19	0.62
	3.71	2.97		1.5	0.43
	1.34	1.91		0.7	1.41
	0.77	2.6		0.87	0.94
	1.8	1.23		1.15	0.16
	0.89	2.51		0.64	0.81
	2.13	0.88		1.23	1.09
	1.05	0.72		0.65	0.92
	0.97	1		0.66	0.27
	1.19	1.01		1.34	0.97
	2.83	0.94		0.52	1.28
	1.31	0.75		0.89	0.47
	1.22	1.11		0.34	1
	1.59	1.09		0.83	0.45
	1.32	1.42		1.71	0.37
	0.9	0.97		0.85	0.49
	1.18	1.03		0.33	0.42
	1.64	0.8		0.81	2.14
	0.75	1.08		1.57	0.53
	2.88	0.74		0.34	1.08
	1.47	0.85		2.13	2.8
	1.56	0.37		0.8	0.33
	2.9	2.09		1.14	1.27
	3.92	0.24		1.41	0.31
	1.43	2.23		0.61	0.36
	2.38	0.29		0.63	0.69
	4.1	1.79		0.47	1.02
	2.04	2.08		1.11	1.6
	1.19	1.38		0.32	1.25
	1.27	1.15		0.38	0.32
	1.52	0.46		3.46	0.54
	1.06	0.67		2.02	0.79
	1.7	3.61		0.45	0.95
	1.98	1.32		1.11	0.48
	1.36	0.79		1.25	1.02
	3.01	0.91		1.41	1.18
	1.68	2.34		0.76	1.6
	1.09	1.07		1.05	1.3
	1.52	0.54		0.43	0.98
	1	1.36		1.01	0.43
	1.51	1.69		1.41	0.48
	2.67	1.22		1.05	1.94
	1.78	0.99		1.43	3.04
	5.55	2.67		1.24	1.08
	0.88	0.92		0.43	1.47
	1.42	1.54		0.48	0.62
	1.99	0.61		0.59	1.21
	1.07	1.4		0.71	1.1
	1.27	1.44		0.73	1.05
	2.64	0.71		0.42	1.41
	2.1	1.41		0.99	1.54
	1.84	1.57		1.07	0.41
	1.49	1.16		1.42	0.59
	0.93	1.04		0.99	2.29
	1.53	0.97		2.27	0.94
	3	1.3		0.78	0.86
	0.83	0.58		0.45	1.29
	2.35	0.81		0.7	0.82
	2.1	0.69		1.47	0.3
	2.5	0.95		2.97	1.04
	1.55	1.43		1.44	1.23
	2.28	0.89		1.07	0.5
	1.38	1.53		1.36	2.25
	2.46	5.18		0.84	0.25
	1.56	1.93		1.31	0.29
	2.82	1.12		1.05	0.05
	1.34	0.53		0.67	0.65
	1.55	2.12		0.41	0.97
	1.38	0.81		0.51	0.88
	0.9	0.64		0.91	2.19
	1.73	0.94		0.98	2.78
	1.03	2.22		1	0.73
	1.45	1		0.8	0.57
	0.63	1.22		1.09	0.9
	0.62	1.65		0.63	1.16
	1.66	1.11		1.34	1.9
	1.78	1.57		1.82	1.06
	0.9	1.47		2.95	0.75
	3.98	1.12		0.6	2.26
	1.58	2.53		0.97	2.16
	2.34	2.72		2.74	0.73
	1.66	3.05		1.06	1.27
	1.06	1.4		0.54	0.85
	2.59	0.81		1.3	1.29
	2.91	1.07		1.51	1.97
	1.8	2.05		1.12	1.55
	2.33	1.2		0.44	0.39
	2.39	1.1		1.03	0.83
	1.06	0.84		1.84	0.93
	1.96	1.38		0.39	0.51
	1.09	0.91		0.61	1.89
	2.29	1.33		2.81	0.93
	2.26	1.84		1.05	1.67
	3.12	2.34		1.32	0.66
	1.22	1.45		0.76	0.74
	0.9	2.27		6.13	1.39
	1.42	0.92		1.61	0.33
	1.53	2.06		0.4	0.33
	2.83	1.01		1.66	1.17
	1.21	0.91		3.08	0.66
	1.32	0.88		1.39	1.01
	2.05	1.41		1.29	1.5
	1.22	0.63		0.7	1.45
	1.26	1.87		0.49	0.36
	1.5	0.65		0.86	3.01
	0.87	1.15		1.73	1.32
	1.24	1.24		0.16	0.83
	0.99	1.18		1.1	0.69
	0.84	1.46		1.2	0.35
	2.18	1.72		0.63	0.45
	3.29	0.84		0.76	0.95
	2.88	0.49		1.33	1.54
	1.78	1.18		0.88	0.76
	0.59	1.55		0.92	1.34
	1.37	2.09		0.74	0.56
	1.84	1.16		1.21	0.98
	1.97	1.28		1.32	1.75
	0.98	0.65		1.11	0.85
	2.16	1.16		0.75	1.15
	0.95	1.03		0.45	0.5
	2.45	0.9		1.47	0.35
	0.79	1.5		1.05	0.7
	1.21	0.77		0.46	1.48
	1.66	1.01		0.93	1.07
	1.9	0.87		0.37	1.7
	1.32	0.41		1.64	0.93
	2.16	1.01		0.31	1.39
	2.16	0.46		1.02	1.71
	2.36	0.47		1.37	0.82
	3.77	0.92		1.11	0.79
	0.77	1.34		1.87	1.23
	1.45	0.66		1.28	1.5
	0.98	2.04		0.52	0.36
	1.97	1.17		0.97	0.57
	1.13	0.75		0.66	0.74
	2.1	0.5		0.91	0.49
	0.82	0.17		1.26	1.69
	1.01	0.78		0.94	1.89
	2.58	0.82		0.41	0.16
	1.69	1.63		0.56	0.8
	1.39	0.57		1.26	1.35
	1	1.54		1.08	0.95
	1.54	1.19		0.48	0.35
	1.13	2.75		0.61	1
	1.63	2.19		0.82	0.43
	0.83	1.09		1.07	2.05
	1.28	0.58		0.94	1.14
	1.42	0.73		0.49	0.39
	0.87	1.72		0.88	0.97
	0.5	0.88		0.62	0.97
	0.99	0.8		0.83	0.23
	1.08	2.87		1.23	1.82
	1.05	0.63		0.33	0.5
	0.77	1		1.14	0.48
	1.72	0.96		1.44	1.27
	3.71	0.95		1.73	0.5
	1.19	0.94		0.65	1.12
	2.16	0.9		1.18	1.12
	2.4	1.26		1.58	1.17
	2.93	2.11		1.48	1.42
	1.05	1.41		0.53	2.47
	1.33	1.21		0.93	0.98
	1.56	0.92		0.72	1.73
	2.06	1.54		0.37	0.37
	1.03	0.99		1.03	0.24
	1.03	1.05		0.94	0.86
	1.23	0.73		1.03	0.43
	2.22	2.06		1.96	0.67
	1.38	1.13		0.44	0.82
	1.73	0.81		0.68	0.94
	3.76	0.93		0.49	0.49
	1.83	0.26		2.16	0.8
	0.93	0.91		1.02	0.39
	1.59	1.45		0.77	0.54
	1.44	1.37		1.51	0.86
	1.16	1.22		1.35	0.28
	1.22	0.35		1.67	1.03
	1.01	1.98		0.62	0.87
	1.47	2.52		0.52	3.04
	1.13	1.65		0.7	1.87
	2.64	1		0.93	1.21
	1.37	2.33		0.85	0.78
	1.53	1.69		0.96	0.28
	1.24	1.29		1.53	0.38
	0.95	0.92		0.12	0.47
	0.79	0.94		0.7	1.22
	0.87	0.52		0.33	0.5
	1.02	0.95		1.04	0.83
	2.38	0.93		0.16	1.01
	1.26	0.38		2.35	0.51
	2.33	2.23		0.28	0.4
	1.06	2		1.17	0.58
	1.05	0.92		1.01	1.3
	1.09	1.03		0.82	1.36
	2.12	0.66		0.6	0.58
	1.25	0.81		2.02	1.17
	1.03	2.27		1.43	1.24
	1.39	2.91		1.39	0.8
	0.99	0.95		0.9	1.8
	1.18	1.15		0.24	0.51
	2.06	1.13		0.65	0.2
	1.53	0.69		1.12	1.67
	1.6	1.17		1.19	0.44
	1.54	1.89		0.43	0.75
	2.21	1.24		0.22	0.39
	0.73	0.96		1.12	0.89
	1.84	0.97		0.29	1.02
	1.2	0.29		0.41	2.31
	0.7	1.23		1.73	0.52
	1.43	0.65		0.56	0.27
	0.61	1.45		0.99	2.86
	1.08	0.52		1.23	1.32
	3.13	1.16		1.62	1.45
	1.12	1.36		0.32	0.98
	1.09	1.11		0.38	1.7
	1.04	1.5		1.39	0.37
	0.95	0.78		1.17	0.21
	1.13	0.79		0.83	0.86
	0.75	0.56		0.83	1.96
	0.45	1.14		0.27	1.2
	1.94	1.26		0.76	1.97
	1.55	0.62		0.65	1.72
	1.34	1.39		0.89	3.1
	1.03	0.86		1.13	3.04
	2.09	0.96		0.89	2.01
	1.51	0.56		1.31	0.99
	1.31	0.95		0.39	1.28
	1.58	0.94		0.33	0.88
	0.79	0.96		0.96	1.49
	1.04	0.74		0.7	1.37
	0.98	0.83		2.53	0.28
	1.32	1.75		1.71	0.05
	1.26	1.36		1.28	0.48
	0.93	1.15		0.71	1.14
	0.96	1.2		0.93	1.1
	1.5	1.24		1.89	2.35
	2.12	0.81		0.72	0.73
	1	1.28		0.66	0.81
	1.23	1.02		0.74	0.54
	1.53	1.01		0.66	0.08
	0.9	0.36		0.68	0.38
	1.57	2.52		2.37	1.04
	1.23	1.4		1.27	2.17
	1.74	0.9		1.78	3.23
	1.3	2.06		0.95	1.35
	1.48	1.33		0.48	0.88
	1.1	0.74		0.95	0.78
	0.78	0.66		0.77	1.4
	0.72	1.16		0.95	1.46
	1.19	0.54		1.45	0.36
	2.09	0.32		0.39	2.02
	0.75	1.64		1.62	1.08
	1.54	1.4		1.79	0.17
	1.09	1.74		1.26	1.08
	1.81	0.61		1.63	1.38
	1.46	1.25		0.84	2.08
	0.93	0.99		0.38	0.91
	1.04	0.88		1.38	0.36
	1.57	2.54		0.47	1.37
	1.08	1.02		0.79	0.35
	2.57	1.13		1.5	1.92
	1.24	1.97		0.45	2.2
	0.92	1.68		1.28	2.43
	1.46	1.99		0.96	1.54
	0.61	1.72		1.49	0.26
	1.15	0.99		1.18	1.25
	2.28	1.28		0.41	1.44
	2.52	1.22		1.74	0.91
	1.06	1.47		1.61	1.57
	0.98	1.8		0.78	2.08
	1.45	1.53		0.76	2.97
	1.44	1.35		0.37	1.49
	1.81	0.65		1.36	1
	2.36	1.04		1.35	1.62
	2.2	0.93		1.09	1.8
	2.46	1.36		1.4	2.1
	1.97	1.47		0.67	2.35
	0.46	1.6		1.22	1.15
	1.4	1.03		0.61	0.9
	0.88	0.73		0.58	0.92
	1.62	0.66		2.58	1.34
	1.3	1.27		0.98	0.65
	1.72	0.47		1.41	1.86
	1.96	1.03		1.96	0.72
	1.8	1.13		1.06	1.33
	2.51	2.1		0.45	2.27
	0.6	1.15		0.67	1.47
	0.66	1.03		0.68	0.8
	0.9	0.9		1.09	1.62
	1.77	0.73		1.04	1.28
	1.72	2.22		3.29	0.89
	1.35	0.96		1.64	2.93
	1.37	1.42		0.65	0.68
	1.1	1.32		2.46	2.43
	1.24	1.58		0.97	1.42
	0.87	1.35		0.34	1.71
	2.03	0.58		3.32	2.25
	1.89	1.21		3.74	2.02
	3.76	1.08		1.39	2.56
	2.16	1.25		0.48	0.9
	1.37	1.02		0.79	1.49
	1.25	2.56		0.62	1.28
	1.22	1.64		0.75	4.08
	2.39	1.14		0.3	2.97
	1.95	1.82		1.02	1.02
	0.91	1.52		0.9	2.58
	1.95	0.44		0.5	1.24
	1.25	0.95		1.83	0.92
	0.45	0.55		0.35	1.41
	1.26	3.36		1.67	1.76
	1.84	1.41		1.26	3.59
	1.62	1.39		0.77	1.82
	1.8	1.11		0.68	1.12
[truncated: 14,728 more rows]
