# Supplementary material for: A neurotrophin functioning with a Toll regulates structural plasticity in a dopaminergic circuit
Source: eLife. 2024 Dec 20;13:RP102222. doi: 10.7554/eLife.102222 (PMC11661795; doi:10.7554/eLife.102222)
Supplement: Figure 5—figure supplement 1—source data 1. [file elife-102222-fig5-figsupp1-data1.xlsx]

## Sheet: Figure 5 fig suppl 1 sour dat 1
Figure 5 figure supplement 1 source data 1
Effect of dTrpA1 on number of GFP+ in SMP region
Genotype	No. GFP+ Spots at 18°C		Genotype	No. GFP+ Spots at 30°C
Control: DNT2G4> UAS-DNT2-FL-GFP	214		Control: DNT2G4>UAS DNT2-FL-GFP	120
	174			54
	89			247
	54			263
	148			277
	192			193
	88			129
				207
				339
				152
				49
				110
Control: DNT2-GAL> UAS-TrpA1, UAS-DNT-2FL-GFP	58		DNT2-GAL>UAS-TrpA1, UAS-DNT-2FL-GFP	387
	217			404
	232			398
	139			666
	32			614
	169			357
	202			410
				344
				428
see Supplementary File 2
