# Supplementary material for: A neurotrophin functioning with a Toll regulates structural plasticity in a dopaminergic circuit
Source: eLife. 2024 Dec 20;13:RP102222. doi: 10.7554/eLife.102222 (PMC11661795; doi:10.7554/eLife.102222)
Supplement: Figure 5—figure supplement 2—source data 1. [file elife-102222-fig5-figsupp2-data1.xlsx]

## Sheet: Figure 5B
Sun et al A neurotrophin functioning with a Toll regulates structural plasticity in a dopaminergic circuit
Figure 5B. Effect of activity with TrpA1 on Homer+ spots in DNT-2 neurons
Genotype	No. Homer+ spots		Genotype	No. Homer+ spots
DNT2Gal4>UASHomer-GCaMP3.0	97		DNT2Gal4>UASHomer-GCaMP3, UASdTrpA1	147
	97			256
	111			532
	285			334
	227			334
	238			238
	121			594
	343			404

## Sheet: Figure 5 figure supplement 1
Figure 5 figure supplement 1
Effect of dTrpA1 on number of GFP+ in SMP region 18degree control
Genotype	No. GFP+ Spots at 18°C		Genotype	No. GFP+ Spots at 30°C
Control: DNT2G4> UAS-DNT2-FL-GFP	214		Control: DNT2G4>UAS DNT2-FL-GFP	120
	174			54
	89			247
	54			263
	148			277
	192			193
	88			129
				207
				339
				152
				49
				110
Control: DNT2-GAL> UAS-TrpA1, UAS-DNT-2FL-GFP	58		DNT2-GAL>UAS-TrpA1, UAS-DNT-2FL-GFP	387
	217			404
	232			398
	139			666
	32			614
	169			357
	202			410
				344
				428

## Sheet: Figure 5 fig suppl 2 sou dat 2
Figure 5 figure supplement 2. 18°C controls for Figure 5B
Genotype	No. Homer+ spots		Genotype	No. Homer+ spots
DNT2Gal4>UASHomer-GCaMP3.0	306		DNT2Gal4> UASHomer-GCaMP3, UASdTrpA1	234
	112			224
	94			469
	270
	33
	66
see Supplementary File 2

## Sheet: Figure 5C
Figure 5C. Stimulating DNT-2 neurons induced synaptogenesis in PAM neurons
Data used to generate graphs in Figure 5C. See Table S2.
	Number of Syt-GCaMP6+ synapses							Volume of Syt-GCaMP6+ synapses
	SMP Dendrite			MB lobe				SMP Dendrite			MB lobe
Genotype	DNT2>TrpA1, R58E02>syt-GCaMP6 18ºC	DNT2>TrpA1, R58E02>syt-GCaMP6 30ºC		DNT2>TrpA1, R58E02>syt-GCaMP6 18ºC	DNT2>TrpA1, R58E02>syt-GCaMP6 30ºC		Genotype	DNT2>TrpA1, R58E02>syt-GCaMP 18ºC	DNT2>TrpA1, R58E02>syt-GCaMP6 30ºC		DNT2>TrpA1, R58E02>syt-GCaMP6 18ºC	DNT2>TrpA1, R58E02>syt-GCaMP6 30ºC
	2217	2983		3232	3939			0.33	0.23		0.01	1.08
	990	3194		3113	3654			0.51	0.12		1.17	1.03
	2573	3704		4191	3383			0.26	0.58		1.54	1.76
	2364	2966		4098	3675			0.19	0.73		0.44	1.01
	5125	3118		3594	3778			1.55	1.76		0.12	0.02
	2620	2343		4124	3763			1	0.85		0.07	0.15
	4120	4919		3857	3444			1.49	1.02		1.3	1.76
	3858	4084		3851	3504			0.57	1.08		2.47	1.34
	1903	3421		3126	3418			0.8	0.46		1.38	0.33
	2649	5299		3191	3158			0.3	1.65		1.21	0.91
	1321	2511		3413	3932			0.94	0.7		0.05	0.18
	3259	3207		3428	4459			1.92	1.21		0.09	1.27
	1949	3237		2134	3853			0.38	0.36		0.28	0.29
	1673	2704		2093	3626			1.72	1.14		0.33	1.79
	3658	5094		3044	3972			0.13	0.81		1.87	0.33
	3081	5180		3045	4009			0.43	1.19		0.6	0.62
	552	4124		3653	3376			0.27	0.72		2.02	0.82
	176	2502		3331	3552			1.11	0.2		0.93	1.12
	1534	2883		3693	3027			2	2.77		2.01	1
	4053	3448		3847	3023			1.46	0.78		1.59	1.23
	3627	2538		3921	3500			0.89	1.38		4.19	1.12
	3083	3411		3593	3621			1.84	0.35		1.23	0.37
	4174	4258		3642	2938			1.88	0.36		1.88	0.93
	4541	2951		3546	3155			1.33	2.1		0.88	0.63
	3601	4169		4396	3493			0.64	0.05		1.97	1.01
	2954	4692		4086	3578			1.92	1.04		1.41	0.1
		2989			3147			0.86	0.37		1.22	0.1
		3318			3012			0.41	0.42		1.52	1.38
								1.67	1.62		1.83	0.61
								0.76	0.72		0.11	0.96
								0.85	0.68		0.18	0.13
								0.57	0.64		0.13	0.82
								0.57	1		0.17	1.07
								0.77	0.95		0.1	0.94
								1.39	0.09		2.15	0.54
								1.54	2.01		1.04	1.42
								0.77	0.78		0.73	2.65
								1.89	1.55		1.99	0.99
								0.56	2.16		0.8	0.76
								1.75	1.6		1.29	2.43
								1.21	0.63		2	1.61
								0.57	0.84		1.16	0.28
								1.37	1.05		0.17	1.34
								0.7	1.73		1.32	0.3
								0.57	1.9		0.52	1.82
								0.74	1.75		1.55	0.01
								1.39	1.23		3.09	1.75
								1.19	2		1.43	1.43
								0.98	0.62		0.28	0.41
								0.64	1.15		0.12	2.8
								0.71	1.07		0.76	0.41
								0.44	0.65		0.6	1.98
								2.37	0.75		0.34	2.21
								0.36	0.97		0.01	0.13
								0.27	0.49		0.91	0.83
								0.48	1.61		1.25	0.37
								0.32	0.71		1.08	1.31
								1.06	1.34		0.65	0.33
								1.11	0.8		1.39	0.71
								1.92	0.88		0	0.88
								0.88	1.58		1.74	0.89
								1.14	0.98		1.02	1.62
								1.03	1.73		1.07	1.22
								1.57	2.88		2.26	2.5
								2.45	1.04		0.67	2.57
								0.48	0.79		0.65	1.12
								1.05	0.4		0.91	0.55
								1.27	1.05		0.67	0.01
								3.25	0.94		1.04	0.35
								0.93	1.83		0.05	1.15
								1.32	0.39		0.09	0.04
								1.14	1.52		0.76	1.25
								1.17	0.71		0.62	2.48
								1.88	0.64		0.32	0.33
								1.36	1.02		0.11	0.16
								1.55	0.15		0.21	2.28
								0.59	0.44		0.73	1.54
								1.7	1.81		1.3	0.02
								0.97	0.54		1.31	1.01
								0.27	1.33		0.77	0.3
								0.65	2.25		1.05	0.35
								1.01	1.2		0.97	0.04
								1.02	0.77		0.34	0.06
								1.33	1.35		1.06	0.5
								3.09	1.47		0.69	1.24
								1.46	0.96		1.28	0.52
								1.92	0.94		2.74	0.17
								1.24	0.92		1.02	0.69
								0.1	0.88		0.53	0.66
								0.96	0.88		1.55	0.05
								0.05	0.59		0.04	1.96
								2.92	0.42		1.24	1.05
								1.4	1.36		3.53	0.14
								1.16	1.09		0.91	1.07
								0.93	1.82		0.82	0.99
								4.46	2.7		1.01	0.95
								1.14	0.84		0.3	0.29
								0.37	2.3		0.45	0.48
								0.78	0.42		0.08	0.36
								1.81	0.4		1.95	0.08
								1.49	0.73		0.92	1.43
								1.4	0.33		2.07	0.12
								0.51	0.4		0.99	1.96
								1.04	0.25		0.91	1.23
								0.86	0.37		0.93	0.56
								2.19	0.35		0.46	1.02
								0.4	0.37		1.41	0.13
								1.11	0.29		0.28	0.62
								2.18	0.63		0.04	0.29
								1.57	1.48		0.29	0.36
								1.97	0.55		2.24	1.4
								1.35	1.08		2.72	0.91
								1.69	1.04		0.99	0.6
								0.92	0.59		1.39	0.31
								3.26	0.73		0.73	0.57
								0.42	0.7		1.24	0.64
								0.52	0.76		1.04	0.29
								0.26	0.55		0.99	0.08
								1.41	0.57		0.96	0.47
								0.4	1.74		0.05	0.82
								2.43	1.66		0.36	0.56
								1.61	1.49		0	1.41
								0	0.45		0.09	2.09
								0.52	2.27		0.42	0.94
								1.59	1.28		0.13	0.25
								1.09	1.5		1.21	1.56
								2.58	1.43		2.99	1.13
								0.05	1.98		0.63	0.48
								0.93	2.23		0.19	1.03
								0.33	1.31		0.21	0.37
								0.71	0.7		1.95	0.45
								0.24	1.13		0.9	0.35
								1.64	1.37		1.24	0.96
								0.52	1.08		0.96	1.15
								0.3	1.52		0.27	0.09
								0.69	3.27		2.53	0.22
								0.44	0.32		0.12	1.07
								0.87	0.92		0.86	0.86
								0.24	1.32		0.8	0.62
								0.06	1.91		1.81	1.13
								0.04	1.31		1.36	1.05
								0.33	0.76		0.14	0.79
								0.97	1.29		1.43	1.06
								0.81	1.08		3.08	0.92
								0.66	0.61		1.03	1.13
								0.63	1.05		1.6	1.4
								1.05	1.08		1.41	1.37
								0.42	0.51		0.05	0.75
								0.35	0.53		1.06	0.4
								0.35	1.02		0.61	0.56
								1.43	0.88		2.33	1.19
								0.72	1.38		1.34	1.58
								0.04	0.52		0.37	0.51
								0.26	1.12		0.79	4.34
								0.39	2.12		0.77	0.38
								1.05	0.5		1.24	1.2
								1.2	1.94		0.29	1.26
								0.78	0.87		1.19	0.81
								1.42	1.51		0	1.32
								1.28	2.47		1.07	0.51
								1.01	3.85		0.83	0.47
								0.82	1.19		0.26	0.47
								0.02	1.31		0.11	0.52
								2.51	1.18		1.45	2.96
								0.72	0.41		0.34	0.67
								0.45	3.03		1.06	1.37
								0.58	0.24		1.8	0.39
								2	0.5		1.24	0.47
								0.57	0.48		0.74	0
								0.62	0.41		1.14	0.39
								0.57	1.21		0.02	2.96
								0.3	1.14		0	0.5
								0.67	0.88		4.94	0.05
								1.16	1.44		2.14	1.29
								1.05	1.13		1.28	0.82
								0.45	0.55		0.96	0.47
								0.46	1.63		1.33	0.28
								1.1	0.37		2.41	3.03
								3.42	1.33		0.3	0.87
								1.61	0.4		3.28	0.76
								0.29	1.7		0.78	0.16
								0.78	0.59		0.96	2.24
								0.03	0.99		1.22	0.39
								0.79	1.19		0.67	0.05
								0.44	0.21		0.57	1.52
								0.86	0.65		0.73	0.88
								0.57	3.4		1.3	0.68
								0.97	0		0.49	0.37
								1.45	0.04		1.77	1.32
								1.61	0.12		0.96	1.47
								0.94	0.38		0.23	1.04
								1.26	0.77		1.56	2.31
								1.09	0.25		0.37	2.78
								0.5	1.47		1.17	0.57
								2.09	2.34		1.26	0.43
								2.3	0.72		0.07	1.66
								1.69	1.04		1.31	1.28
								1.58	3.32		2.25	0
								1.49	0.49		1.76	1.15
								2.43	0.64		1.67	1.13
								1.68	0.49		1.36	0.87
								2	0.8		0.88	0.32
								1.16	0.34		1.34	0.66
								2.06	0.52		0.98	2
								1	1.27		0.58	0.62
								0.77	0.91		0.23	0.77
								3.05	1		0.72	1.77
								0.78	1.75		0.98	0.64
								1.72	0.28		0.83	2.75
								0.46	0.05		0.4	1.3
								1.99	0.28		1.39	0.05
								1.32	1.61		3.26	3.62
								1.34	0.46		1.65	0.79
								1.96	0.11		0.84	0.03
								0.09	0.82		0.46	0.81
								0.5	0.59		2.02	1.08
								2.59	0.61		0.12	1.59
								1.45	0.73		0.57	2
								1.1	0.05		1	0.39
								1.24	1.03		2.08	0.15
								0.39	1.25		2.1	1.14
								2.17	0.78		0.36	0.82
								0.78	1.16		0.64	1.12
								1.89	0.01		0.51	1.44
								0.53	0.47		0.29	0.79
								1.03	3.08		1.61	4.21
								1.78	0.56		0.02	0.95
								0.49	0.12		3.16	0.54
								1.97	0.65		1.1	0.59
								1.04	2.34		1.01	1.92
								1.37	0.28		2.56	2.4
								0.97	1.47		0.92	0.46
								0.76	0.47		0.24	0.46
								4.57	2.48		0.4	0.06
								0.98	0.31		1.08	1.58
								1.26	0.61		0.62	0.92
								0.4	0.32		1.36	1.76
								0.48	0.13		1.09	1.85
								0.57	0.69		1.53	1.11
								1.9	0.92		0.05	2.34
								0.45	0.01		0.41	2
								0.48	1.21		0.05	2.32
								1.97	0.3		1.17	1.62
								0.48	0.39		1.88	0.93
								1.04	0.45		1.1	2.11
								1	0.23		0.61	0.2
								1.33	0.38		0.63	1.06
								2.01	1.32		0.99	0.66
								1.08	0.66		0.47	1.15
								0.49	3.02		0.08	0.33
								0.38	0.31		1.15	0.2
								0.14	0.87		0.77	0.44
								1.68	0.12		0.46	0.88
								0.48	1.37		2.07	0.85
								1.35	0.09		1.61	1.67
								0.37	2.15		0.69	0.48
								1.63	1.08		0.09	0.04
								0.37	0.88		0.1	0.29
								0.49	0.3		0.18	2.44
								2.06	2.05		0.79	0.64
								0.54	2.38		0.94	0.95
								2.03	2.06		1.04	0.71
								0.34	0.07		0.84	0.92
								1.11	1.8		0.03	0.69
								4.82	0.56		0.64	3.15
								0.08	0.04		2.05	1.02
								0.05	0.42		1.14	0.04
								0.77	0.12		0.25	1.33
								1.9	0.36		1.29	1.52
								1.38	0.79		0.15	1.65
								1.16	0.38		0.97	0.96
								1.37	0.24		0.4	0.16
								0.27	0.2		0.61	0.94
								1.95	2.03		0.07	0.04
								1.25	0.66		0.07	0.8
								0.12	1.06		0.43	0.09
								0.57	0.09		1.07	0.3
								0.6	0.15		0.59	0.37
								0.48	0.31		1.5	0.36
								0.46	0.17		2.92	0.02
								0.97	0.54		0.6	0.35
								0.97	0.02		0.41	1.25
								0.47	0.49		2.44	0.75
								0.62	0.15		7	0.31
								0.11	0.25		1.04	2.47
								0.08	2.41		3.64	0.13
								1.07	1.3		0.75	0.88
								1.01	1.48		1.3	1
								0.84	0.56		1.2	1.19
								0.57	0.49		0.3	3.02
								2.21	0.31		2.92	0.04
								0.11	1.06		0.62	0.34
								0.99	0.65		0.59	0.44
								0.47	0.29		0.84	0.36
								0.85	1.73		0.76	0.03
								1.47	1.01		1.02	0.91
								1.08	0.22		1.18	0.26
								2.9	0.32		0.42	0.36
								1.36	2.19		1.09	0.31
								2.28	1.64		1.3	0.46
								0.49	1.64		0.05	0.84
								0.04	0.29		0.48	0.09
								0.66	0.88		0.94	1.02
								0.06	0.62		0.37	1.16
								0.39	0.46		2.49	0.27
								1.09	0.88		0.4	0.91
								0.29	1.02		0	0.29
								2.27	0.95		2.24	1.65
								1.02	2.22		0.45	0.67
								0.45	3.83		1.02	0.34
								1.86	0.66		0.88	0.43
								1.04	0.19		0.26	2.22
								0.33	0.91		1.44	2.02
								1.37	0.72		1.24	0.37
								1.22	2.72		0.06	0.45
								0.49	2.6		0.68	0.51
								0.23	0.29		0.5	0.42
								1.21	1.26		0.05	0.59
								0.05	1.1		0.39	1.33
								1.12	0.73		0.68	1.31
								0.5	1.91		2.12	0.16
								1.48	0.83		0.84	0.57
								2.01	0.43		0.23	0.4
								1.38	1.09		0.02	0.4
								0.79	0.59		0.85	0.44
								0.41	0.79		0.19	1.27
								1.1	1		4.45	0.73
								0.74	1.18		1.43	0.72
								1.38	0.39		3.44	0.66
								0.49	1		0.31	0.9
								0.52	0.37		0.08	0.34
								0.63	0.24		0.04	0.94
								0.79	0.31		1.92	2.18
								0.07	0.46		0.12	0.34
								0.01	1.23		1.5	0.06
								0.48	1.26		0.96	0.11
								0.94	0.27		0.05	0.49
								1.03	0.62		1.32	0.56
								1.01	0.53		0.01	1.02
								0.79	1.06		0.7	1.56
								1.39	0.71		0.18	0.33
								0.51	2.04		2.63	1.31
								0.18	1.53		0.52	0.05
								1.51	0.73		0.78	0.14
								0.05	1.15		0.04	0.93
								1.96	1.82		1.19	0.77
								2.1	0.35		0.4	2.43
								0.83	0.24		1.57	1.33
								0.57	0.19		0.35	0.04
								0.47	1		0.32	0.3
								0.52	2.17		0.95	1.52
								1.62	1.57		1.4	0.74
								1.11	1.24		0.82	1.54
								0.66	0.58		0.04	1.44
								0.39	1.44		0.09	0.4
								1.2	0.77		0.65	0.53
								1.53	0.83		1.05	0.1
								0.76	0.33		0.82	0.27
								1.93	0.23		0.99	0.93
								1.03	0.42		2.14	0.72
								1.18	0.89		0.11	0.02
								0.38	0.37		0.33	0.25
								0.5	1.77		0.25	0.36
								0.9	1.23		0.5	0.95
								0.83	1.97		0.48	0.46
								0.04	0.46		0.86	0.02
								0.39	0.38		0.95	0.25
								0.72	0.32		0.24	1.41
								0.84	0.76		1.32	1.1
								1.21	0.88		0.66	0.51
								2.49	0.64		0.24	0.91
								1.65	0.85		1.22	1.17
								0.32	0.66		0.83	0.41
								1.25	2.22		1.58	0.37
								1.04	2.1		1.9	4.16
								0.3	0.97		1.3	0.44
								1.21	0.7		1.42	0.55
								1.72	1.11		1.51	0.11
								1.53	3.05		0.04	0.22
								1.69	1.26		0.67	0.46
								0.34	1.05		2.18	3.43
								0.77	0.17		0.43	0.5
								1.21	0.34		0.83	1.17
								1.01	0.82		1.2	0.71
								1.54	0.85		1.76	1.75
								0.96	0.32		0.54	0.96
								0.87	2.67		3.54	0.11
								0.34	1.63		2.19	0.74
								1.46	1.5		0.42	1.35
								2.9	1.57		1.95	0.24
								0.83	0.33		1.52	0.82
								0.64	0.48		1.53	1.11
								1.15	0.97		0.02	0.2
								1.54	1.32		1.71	2.5
								2.73	0.55		0.22	0.83
								0.43	2.18		1.17	0.4
								1.03	1.49		2.45	0.04
								2.54	0.05		0.87	0.25
								1.76	0.39		1.27	0.09
								2.12	0.32		0.46	1.09
								0.3	0.06		1.08	1.2
								0.96	1.09		0.36	1.69
								5.53	0.84		0.94	0.11
								0.74	0.59		1.41	0.92
								2.71	0.37		0.05	2.81
								0.78	1.84		0.56	0.73
								1.66	2.12		0.75	0.2
								0.56	0.26		2.86	2.13
								1.22	0.15		0.88	0.45
								1.23	0.04		1.18	0.11
								0.57	1.32		2.96	1.83
								1.73	0.91		1.13	2.17
								0.8	0.37		1.95	2.65
								2.49	0.02		2.42	0.97
								1.91	0.26		1.94	1.02
								2.03	0.06		1.25	2.31
								0.78	1.1		0.06	1.15
								0.16	0.09		0.78	0.05
								0.98	1.12		1.11	1.64
								0.74	0.47		1.1	0.83
								1.05	0.22		2.58	0.56
								0.36	0.44		0.4	0.81
								0.66	0.05		0.48	3.32
								3.26	0.42		0.36	2.35
								1.32	0.58		0.69	0.22
								1.2	0.24		1.18	1.18
								0.15	2.73		1.19	1.8
								0.6	0.82		0.38	0.95
								0.03	1.49		1.25	0.36
								0.66	0.22		0.83	0.71
								0.86	0.35		1.23	0.11
								1.72	0.05		0.67	0.25
								0.5	0.86		0.03	1.64
								1.4	0.37		1.21	0.43
								0.58	0.26		1.67	1.03
								1.24	0.48		0.75	0.21
								1.34	1.89		1.38	2.19
								0.79	0.6		1.38	0.69
								0.88	0.8		0.9	0.53
								2.09	0.72		0.76	1.36
								0.12	0.87		1.1	0.22
								0.74	0.74		1.41	1.52
								1.28	1.33		0.37	0.53
								2.7	0.36		1.1	0.72
								0.49	0.2		0.82	2.74
								1.4	0.12		0.94	0.15
								3.1	1.22		0.54	0.32
								0.08	0.49		1.57	0.43
								0.01	0.27		0.53	0.26
								0.5	0		0.05	1.05
								1.07	0.59		2.25	0.56
								0.49	0.84		0.15	0.55
								1.24	0.85		1.56	1.38
								0.96	0.44		0.82	0.41
								2.54	0.79		1.33	1.06
								2.26	0.95		0.87	0.7
								1.41	1.25		0.04	2.26
								0.53	0.36		0.7	1.31
								0.69	2		0.04	1.17
								1.99	0.78		0.94	0.83
								1.97	0.36		0.16	1.39
								0.68	0.69		0.34	1.9
								0.79	0.7		1.05	1.21
								0.76	2.54		0.51	1.63
								1.61	1.9		2.28	1.25
								2.88	0.37		1.03	0.83
								0.75	1		0.05	0.8
								0.8	2.88		0.12	2.4
								1.57	1.84		0.65	0.04
								1.36	0.85		1.57	0.45
								0.25	0.94		0.37	0.72
								1.05	0.35		0.99	0.58
								0.71	0.52		0	0.47
								0.51	0.51		0.49	0.46
								1.61	0.32		0.56	0.14
								1.78	0.75		0.8	0.47
								1.07	0.22		0.31	0.05
								1.98	0.49		0.04	0.19
								2.43	0.26		1.29	0.11
								2.17	0.55		3.23	1.07
								2.06	0.47		0.69	1.77
								2.07	0.42		0.89	1.27
								0.25	0.66		0.8	1.54
								0.85	2.79		0.71	0.34
								1	1.66		0.92	0.9
								1.53	0.8		2.32	0.44
								0.2	0.28		0.49	1.21
								0.85	0.14		0.8	1.25
								0.34	0.79		1.4	1.3
								2.5	0.32		0.47	0.79
								0.46	2.06		0.28	0.05
								0.88	0		0.09	1.04
								0.92	0.63		0.08	1.12
								0.64	1.06		1.17	1.48
								1.2	0.91		0.74	0.9
								0.85	0.5		0.35	0.08
								0.9	0.55		1.85	1.19
								1.38	1.83		1.07	1.66
								0.14	1.16		1.17	0.08
								1.1	0.47		0.62	1.08
								3.24	1.04		0.83	0.4
								1.27	0.23		1.31	0.33
								1.98	0.04		0.47	1.02
								0.66	1.22		0.61	0.68
								0.53	0.48		1.1	1.06
								2.14	0.19		1	1.95
								2.64	1.23		0.19	0.35
								0.4	1.07		2.22	1.88
								1.12	2.73		1.21	1.05
								0.12	0.22		1.35	0.33
								0.7	0.41		1.36	2.54
								0.64	0.28		0.5	0.07
								0.55	1.09		1.46	1.05
								1.29	2.06		0.16	3.6
								1.02	0.39		1.44	0.38
								1.37	0.44		0.72	1.27
								1.66	1.09		0.41	0.21
								0.95	1.28		0.51	3.48
								0.56	1.15		1.12	0.49
								1.13	0		0.52	0.73
								0.73	0.04		0.37	1.4
								1.21	0.65		0.81	0.49
								0.37	0.84		2.12	1.63
								0.49	0.61		0.74	1.16
								1.03	0.68		0.52	2.1
								1.37	0.54		1.06	1.89
								0.36	0.44		0.12	0.58
								1.35	0.35		0.02	0.41
								0.68	1.04		2.73	1.08
								0.92	0.37		0.21	1.5
								1.37	0.7		0.28	0.22
								0.55	1.38		1.14	0.08
								1.11	3.13		0.49	0.1
								1.18	3.3		0.48	0.38
								2.04	1.83		0.37	0.41
								0.48	0.51		0.81	0.57
								0.89	0.93		1.21	0.33
								2.06	3.01		0.05	0.64
								0.07	1.3		1.01	0.16
								1.44	0.87		0.34	1.58
								0.5	0.84		0.46	0.71
								0.92	0.55		1.75	0.99
								1.27	0.8		0.45	0.48
								0.85	0.67		3.1	0.26
								1.89	1.84		0.84	1.02
								3.28	0.12		0.33	0.5
								3.46	0.23		0.32	0.68
								0.69	1.5		1.38	0.01
								0.66	1.03		1.39	0.32
								0.19	0.63		0.94	0.45
								1.59	1.46		0.07	0.7
								2.3	0.02		0.64	1.08
								0.3	2.06		0.35	0.28
								0.33	0.85		1.31	1.24
								0.3	1.45		1.21	1.39
								1.02	0.91		2.02	0.39
								1.42	0.02		1.74	1.27
								0.92	1.77		1.01	0.34
								0.24	0.71		0.37	0.57
								0.29	1.04		0.04	0.05
								1.64	0.57		0.34	0.41
								1.97	1.19		1.81	1.08
								0.3	0.04		0.05	1.38
								1.24	0.65		0.27	0.94
								1.45	0.02		1.29	0.63
								0.45	1.59		0.05	0.04
								0.28	0.67		1.5	0.27
								1.38	1.12		0.1	1.82
								0.35	1.81		0.17	1.67
								1.74	1.07		1.28	1.07
								1.37	0.13		1.05	0.51
								0.38	0.03		0.08	0.96
								0.63	3.28		0.46	0.35
								1.44	0.19		0.03	0.4
								0.66	0.47		0.04	1.9
								1.2	1.93		1.43	1.08
								0.61	0.11		1.79	1.05
								1.08	2.12		1.27	0
								0.36	1.67		1.93	0.73
								0.74	1.43		0.08	0.93
								1.23	0.52		0.65	1.12
								0.4	0.52		0.33	0.43
								2.12	0.17		0.16	1.36
								0.98	0.23		0.59	1.18
								0.43	1.35		1.05	1.54
								0.9	1.37		1.24	0.71
								1.17	1		0.53	1.27
								1.04	0.05		0.43	1.51
								0.12	1.22		0.78	0.89
								1.35	0.97		0.48	0.4
								1.39	3.43		1.15	0.86
								0.81	1.81		0.72	0.86
								1.41	0		1.39	0.54
								1.38	0.13		0.64	1.23
								0.41	0.05		0.63	0.01
								0.19	1.07		0.38	0.37
								1	2.67		0.19	0.91
								0.29	0.17		1.39	0.1
								0.74	0.81		0.04	1.07
								0.85	0.5		0.37	0.05
								1.59	2.77		1.24	0.56
								1.06	1.28		1.37	0.41
								1.53	4.03		0.49	0.38
								2.08	0.05		0.49	1.71
								3.38	0.14		1.22	0.51
								0.55	1.03		0.41	0.83
								2.37	4.1		1.66	0.78
								0.58	2.15		0.12	0.45
								1.32	0.43		0	0.93
								2.97	0.1		0.73	1.81
								0.33	0.22		1.16	1.4
								0.43	1.31		0.06	1.39
								2.29	0.15		0.62	1.9
								2.88	0.22		0.03	0.33
								0.06	0.03		0.29	0.47
								0.45	1.65		0.99	1.9
								0.41	0.36		0.77	0.51
								1.04	0.64		0.42	0.43
								0.01	2.26		1.08	0.45
								0.01	0.45		0.37	0.39
								1.15	1.13		0.64	0.6
								1.64	0.33		0.89	3.6
								0.28	0.14		1.19	0.75
								2.82	0.87		0.05	0.02
								0.13	0.26		1.26	0.72
								0	0.65		0	1.57
								1.89	1.95		0.33	1.95
								0.13	0.53		0.21	0.22
								1.29	0.2		0.22	1.23
								2.99	1.2		5.34	2.09
								0.02	0.31		1.05	0
								1.13	0		1.38	0.25
								0.45	2.04		0.48	1.63
								1.2	1.29		0.46	1.23
								2.02	0.49		0.7	0.45
								0.47	0.64		0.19	0.14
								1.77	0.29		1.26	2.23
								2.63	1.89		0	1.13
								0.48	4.31		1.35	1.93
								0.41	1.37		1.07	0.36
								3.68	4.12		0.98	2.42
								0.09	1.46		0	0.27
								0.3	1.06		0	0.39
								0.05	0.8		1.1	0.43
								0.77	1.68		0.38	0.13
								3.37	1.17		1.43	0.73
								5.57	1.84		1.22	1.57
								0.03	0.27		1.23	1.25
								3.12	1.49		1.29	0.51
								0.87	0.34		0.67	0.4
								2.84	2.48		0.81	1.2
								0.93	0.66		0.11	2.03
								0.01	2.66		0.24	0.87
								0.37	1.05		0.89	0.02
								0.52	0.27		0.14	0.64
								5.16	0.24		0.33	0.34
								0.08	0.95		0.41	5.38
								0.28	1.01		2.56	0.26
								2.69	0.49		2.89	0.45
								0.39	1.48		0.18	0
								0.96	0.59		0.35	0
								0.55	0.02		2.44	0.34
								1.24	0.12		0.3	0.03
								1.34	0.77		0.07	0.01
								4.37	0.87		0.9	1.55
								1.16	2.28		0.45	0.29
								2.26	1.82		1.38	1.04
								1.71	1.59		0.14	0.47
								2.94	0.17		0.27	0.13
								0.12	2.74		0.95	0.13
								1.41	0.3		1.03	0.7
								0.93	0.83		0.8	0.77
								0.42	0.51		0.03	0.17
								0.38	0.51		2	1.47
								0.64	0		0.2	0.84
								0.39	0.01		0.23	0.28
								0.52	0.28		0.49	0.52
								0.78	7.7		0.64	0.05
								0.2	1.46		0	0.49
								0.37	0.34		0.01	2.47
								0.87	1.02		0.8	0.33
								0.45	0.5		0.37	0.3
								0.24	3.06		1.94	0.11
								0.15	0.8		0.45	0.38
								1.84	2.12		0.65	0.32
								0.09	0.22		0.72	0.63
								1.36	0.81		0.87	2.03
								0.71	0.19		0.4	0.4
								0.18	0.98		0.43	0.11
								1.15	2.57		0.16	0.28
								0.48	1.08		0.04	2.59
								0.12	1.72		0.75	0.55
								0.57	1.15		0.95	0.09
								0.1	1.62		0.26	0.08
								1.06	1.13		0.13	0.48
								0.35	3.97		0.49	0.25
								1.44	0.36		0.33	0.9
								0.04	0.38		0.68	0.68
								1.01	0.24		0.47	0.43
								0.83	0.71		0.95	0.18
								0.48	1.42		0.84	1.15
								0.19	0.34		0.86	0.38
								1.64	0.37		0.16	0.17
								1.03	1.4		0	0.53
								1.35	0.6		0.37	0.86
								0.4	1.41		0.09	1.35
								0.37	0.04		0.92	0.27
								0.95	0.69		1.66	0.36
								1.62	0.44		1.15	0.37
								0.09	0.3		0.37	0.55
								0.04	0.63		0.38	0.86
								1.39	0.57		1.73	0.81
								0.91	0.39		0.41	0.1
								1.35	0.09		0.86	0.97
								1.4	1.86		1.89	0.37
								1.49	1.87		1.05	0.23
								0.25	2.55		0.14	0.68
								1.88	0.72		0.09	1.29
								0.13	1.19		1.7	1.86
								0.8	1.36		0.15	0.3
								1.37	0.65		0.48	0.24
								2.1	0.03		0.03	0.86
								1.84	0.34		0.27	0.76
								0.55	0.7		0.41	1.27
								1.14	0.47		0.34	0.71
								0.3	0.03		1.44	0.16
								1.18	0.52		0.89	0.13
								1.49	0.5		0.85	1.3
								0.13	0.34		0.37	0.46
								1.2	2.02		0.02	0.37
								2.12	1.12		1.09	0.04
								0.3	2.66		0.79	0.42
								0.89	2.09		1.11	0.18
								0.69	1.3		1.06	1.4
								1.45	0.64		2.88	0.25
								1.54	0.51		1.01	2.31
								0.96	0.62		0.1	0.78
								0.37	1.27		1.14	0.36
								0.46	0.45		0.93	1.25
								0.21	0.94		0.48	0.31
								1.97	1.1		3.77	1.48
								0.78	1.06		0.43	0.12
								1.05	3.27		0.42	0.44
								1.11	0.1		0.21	0.4
								0.48	0.69		0.1	0.08
								0.72	0.64		1.18	0.52
								0.21	0.96		0.96	2.98
								0.86	1.65		0.27	1.21
								0.87	1.88		0.58	1.09
								0.1	0.92		0.43	4.88
								0.06	0.76		0.2	0.21
								0.39	0.82		0.11	1.07
								2.38	0.5		0.37	1.81
								1.17	0.77		0.6	0.77
								1.16	0.64		1.83	1.46
								0.93	0.05		0.4	1.78
								1.72	2.93		0.34	0.37
								0.09	1.9		0.01	0.26
								1.15	0.69		0.13	1.55
								1.06	1.65		1.2	0.55
								1.12	0.3		0.86	0.08
								1.98	1.81		0.37	0.05
								0.92	0.64		0.27	1.6
								0.31	0.76		0.76	0.42
								0.58	3.13		0.01	0.73
								1.64	0.24		0.41	1.01
								1.11	1.12		0.78	0.35
								0.36	0.88		0.42	0.83
								0.49	1.16		0.26	0.84
								0.49	0.35		0.68	0.94
								1.19	0.05		0.42	2.83
								1.08	0.99		0.63	0.87
								1.79	1.04		0.67	0.02
								0.38	0.29		0.45	1.93
								0.05	0.91		0.23	0.09
								0.96	0.94		0.53	0.1
								0.51	0.36		0.94	1.7
								0.68	1.54		0.11	0.05
								2.06	1.12		0.34	0.41
								0.43	0.11		0.5	0.94
								0.23	1.29		4.56	0.6
								3.55	0.07		1.58	0.83
								1.26	2.08		1.42	0.44
								1.06	0.54		1.25	0.24
								1.42	1.13		0.26	0.1
								0.75	1.9		1.49	0.81
								0.82	0.38		0.56	0.43
								0.9	2.06		0.35	0.02
								0.4	1.14		0.11	0.4
								0.27	0.11		0.91	0.1
								0.09	1.6		0.59	1.26
								0.04	0.7		1.11	0.27
								0.27	3.15		0.13	1.2
								1.21	0.59		0.78	0.31
								1.11	1.01		0.76	0.46
								1.14	1.69		0.73	1.34
								0.46	0.38		0.05	0.32
								1.33	0.09		0.44	0.28
								0.02	1.29		0.82	0.03
								1.85	0.57		1.24	0.13
								1.26	0.32		0.28	0.09
								0.71	0.09		0.7	0.8
								1.7	0.19		0.31	0.2
								0.26	0.12		0.97	1.01
								1.49	0.31		0.38	1.28
								0.37	0.62		0.01	0.13
								0.86	1.47		1.84	0.29
								0.09	1.33		1.39	0.32
								1.7	1.18		0.38	0.36
								0.03	0.13		0.45	0.56
								3.76	1.01		0.12	1.03
								0.81	0.04		1.08	0.31
								1.31	1.29		0.16	1.15
								0.58	0.83		0.28	1.18
								1.19	0.01		1.22	0.91
								0.4	0.04		1.39	0.21
								0.13	0.76		0.53	0.14
								0.46	0.12		0.1	0.05
								0.33	1.94		1.41	1.1
								0.56	0.31		0.54	1.28
								0.53	0.26		0.05	0.34
								0.39	0.42		0.05	0.4
								3.9	0.39		0.02	0.14
								1.24	0.72		0.28	0.54
								0.5	0.46		2.1	0.34
								0.12	0.7		1.87	0.82
								2.48	0.75		0.33	1.19
								1.28	0.75		0.23	2.21
								1.74	0.9		0.48	0.13
								2.44	1.87		1.02	1.33
								3.3	0.55		1.25	0.41
								2.72	1.42		0.26	1.25
								1.06	0.36		0.64	0.27
								1.35	1.49		0.44	1.88
								1.74	0.67		0	0.7
								1.91	0.91		0.07	0.27
								0.96	0.05		1.72	1.22
								1.47	0.2		0.06	0.16
								0.22	0.12		0.23	0.24
								0.92	0.02		0.99	0.52
								2.87	0.63		0.54	1.17
								0.59	0.37		0.12	0.59
								1.69	1.1		3.1	0.46
								1.22	1.05		0.67	0.46
								0.07	0.08		0.07	0.13
								1.13	0.29		0.03	0
								2.26	1.29		0.01	1
								1.49	0.39		1.62	0.04
								0.52	2.27		0.49	1.25
								2.09	0.32		0.25	0.8
								0.75	2.34		0.29	0.33
								1.33	0.45		1.18	0.59
								0.33	0.67		0.06	1.48
								1.22	0.78		1.41	0.57
								1.73	0.99		0.73	0.29
								0.88	1.07		0.22	1.13
								1.82	1.19		0.7	0.41
								0.46	1.43		0.01	0.35
								1.35	0.82		0.37	0.36
								1.08	0.12		0.32	0.66
								1.23	0.82		0.25	1.39
								0.55	0.37		1.92	0.35
								2.93	0.02		1.64	0.99
								0.23	0.09		0.22	0.45
								1.35	0.48		1.05	0.15
								0.04	1.27		0.29	0.05
								0.05	0.98		0.09	1.58
								0.42	0.43		1.04	1.14
								0.78	1.44		1	0.28
								0.09	0.45		0.03	2.41
								1.11	0.05		0.95	0.9
								1.21	2.4		0.19	1.06
								1.11	0.88		0.56	0.05
								1.06	2.95		0.36	0.38
								1.64	0.49		0.54	1.84
								0.29	0.03		0.56	0.44
								1.5	0.36		0.33	1.2
								1.11	0.12		2.16	1.92
								0.04	1.05		0.57	0.37
								2.01	0.12		0.79	0.23
								0.91	1.42		2.16	0.34
								1.97	0.3		2.09	0.49
								1.06	0.37		0.51	0.95
								0.77	0.37		0.42	0.18
								3.51	0.47		0.02	0.55
								0.46	0.85		0.39	2.21
								0.36	0.12		0.23	0.13
								0.08	0.12		0.15	0.16
								0.41	0.3		0.09	0.23
								0.39	1.69		0.04	0.11
								3.4	0.06		0.78	0.5
								0.46	2.87		0.12	0.8
								0.87	1.21		0.1	0.11
								2.11	0.46		1.33	0.38
								1.82	0.43		0.48	1.26
								2.2	0.41		0.18	0.21
								0.36	1.11		0.58	0.51
								1.89	0.41		1.68	1.12
								0.45	0.87		0.54	0.85
								0.3	0.54		0.11	0.73
								2.61	1.24		0.03	0.57
								1.67	0.79		5.23	0.22
								0.06	0.51		1.42	0.45
								0.65	2.24		0.69	0.8
								1.54	0.86		0.8	0.49
								1.1	0.5		0	0.58
								0.84	0.35		0.31	0.08
								1.08	1.29		3.19	0.55
								2.72	0.14		0.6	0.69
								1.25	0.77		0.27	0.34
								3.57	1.14		0.52	0.98
								2.16	0.72		1.55	1.49
								1.83	0.58		0.03	0.85
								0.48	0.04		0.09	0.27
								2.1	0.41		0.01	0.02
								2.6	0.31		1.02	1.23
								0.87	0.2		0.11	1.1
								0.28	0.64		0.28	0.6
								2.47	0.9		0.05	1.12
								1.14	0.35		0.36	0.29
								2.09	0.09		0.54	0.05
								1.14	0.32		0.05	0.44
								3.34	0.67		0.31	0.93
								0.02	0.04		0.31	0.42
								0.07	0.35		0.75	1.49
								5.13	0.12		1.01	0.11
								1.31	2.9		1.43	0.05
								0.41	2.62		0.53	0.75
								1.89	1.53		0.3	0.13
								0.52	2.03		1.34	1.83
								1.82	1.09		2.35	0.38
								1.23	0.02		1	0.2
								1.58	0.35		0.05	0.32
								0.51	1.07		1.14	0.18
								0.99	0.61		0.88	0.18
								0.66	0.43		0.8	1.18
								1.07	0.35		1.24	0.5
								2.84	0.69		0.28	0.88
								1.07	0.09		0.28	0.67
								0.88	0.13		0.37	2.47
								1.81	0.23		1.1	1.17
								1.63	0.65		0.05	1.34
								0.99	0.01		1.17	0.77
								0.95	3.21		0.39	0.73
								1.36	0.19		0.74	0.53
								0.79	0.18		1.16	0.48
								0.53	0.16		0.25	1.52
								0.88	0.01		0	0.24
								0.31	1.13		0.53	0.02
								1.02	3.37		0.15	0.12
								0.51	0.12		0.58	1.85
								0.75	1.89		0.45	0.29
								0.9	0.6		0.39	1.71
								2.71	1.3		0.46	0.54
								0.47	1.04		1.19	0.47
								1.06	1.08		0.33	0.28
								0.14	0.33		0.37	0.99
								1.08	0.27		0.43	1.33
								0.66	0.8		0.07	0.77
								1.33	0.95		0.69	0.37
								0.44	0.04		1.36	0.68
								1.48	2.21		0.49	0.42
								2.2	0.24		3.96	0.45
								1.84	0.37		0.27	0.9
								0.21	1.02		0.4	1.13
								0.88	1.18		0.74	1.64
								2.54	0.34		3.2	0.05
								0.21	1.02		0.35	0.04
								1.91	3.33		0.82	0.53
								0.67	1.64		0.77	1.96
								1.58	1.22		0.84	0.85
								0.49	0.99		0.84	1
								0.29	0.95		0.69	0.26
								1.04	1.12		0	2.93
								1.33	2.7		1.27	0.36
								0.54	1.2		0.08	0.28
								1.01	0.38		0.04	1.41
								0.52	0.46		1.12	0.08
								1.04	1.58		0.23	0.01
								0.84	0.75		1.95	0.64
								0.75	0.22		0.93	0.2
								1.05	0.44		0.63	1.41
								0.3	1.05		0.65	0.92
								0.79	2.06		1.55	0.85
								1.12	1.18		1.03	0.81
								1.81	0.47		2.73	0.89
								0.82	2.99		0.8	0.7
								1.17	0.99		1.32	1.89
								0.45	0.39		1.59	0.61
								0.86	0.91		1.47	0.74
								0.81	0.68		0.48	0.74
								0.75	0.66		0.13	0.24
								1.67	0.52		0.47	0.06
								0.74	0.18		1.24	0.18
								2.71	0.21		0.12	0.15
								0.49	1		0.03	1.02
								1.42	0.53		0.08	1.14
								0.35	1.42		1.16	0.26
								0.48	1.47		0.25	0.69
								1.78	1.8		1.54	0.23
								0.13	0		0.64	0.86
								0.83	1.69		1.07	0.47
								0.66	1.62		2.46	0.39
								0.79	0.76		2.45	1.11
								0.92	2.16		0.69	1.44
								3.01	0.25		0.98	0.27
								0.03	0.98		1.04	0.07
								0.45	1.19		1.68	0.86
								0.78	0.77		0.77	0.03
								0.54	0.74		0.04	0.62
								1.74	1.01		0.25	0.08
								0.4	0.19		0.05	0.13
								1.25	1.53		0.25	0.55
								0.41	1.24		0.08	0.84
								0.57	1		1.43	0.39
								0.34	0.11		0.56	0.55
								1.03	0.11		1.22	0.48
								0.77	0.4		0.41	0.44
								1.61	0.69		0.23	0.51
								0.96	0.94		0.24	0.62
								1.02	1.52		0.59	0
								1.05	0.61		1	0.35
								0.18	1.65		1.6	0.12
								0.94	1.27		0.91	0.61
								1.19	1.17		1.32	0.23
								0.47	0.54		2.44	2.82
								1.44	0.45		0	0.53
								0.85	1.13		0.85	0.37
								3.4	0.97		1	3.06
								0.71	0.3		0.68	0.41
								0.52	0.36		0.87	2.68
								0.41	0.28		0.58	0.02
								0.37	0.1		0.88	1.02
								0.37	0.18		1.01	0.95
								2.81	0.7		0.33	0.22
								0.85	1		1.65	1.42
								0.99	0.39		0.3	0.94
								0.84	0.05		1.04	0.65
								0.18	0.35		0.65	2.07
								0.63	1.19		0.93	1.38
								1.62	0.34		0.54	0.26
								0.49	0.42		1.78	0.86
								0.73	1.34		0.8	0.83
								0.63	1.57		0.12	3.66
								0.38	1.2		1.36	1.29
								1.77	0.7		0.26	1.03
								0.1	1.46		0.97	1.18
								1.89	0.25		0.26	0.45
								0.86	0.37		0.05	0.68
								2.25	1.01		2.05	1.33
								1.92	0.05		0.13	0.46
								3.75	0.35		0.37	0.54
								2.63	1.79		0.63	1.06
								1.09	0.54		1.19	0.32
								1.18	0.51		1.37	1.87
								1.43	0.14		2.3	0.91
								1.13	0.5		1.85	1.14
								1.58	0.09		2.19	0.39
								0.31	0.84		0.79	1.21
								0.5	1.6		0.33	0.68
								2.01	2.16		1	0.04
								0.43	2.78		1.42	1.83
								0.74	0.79		1.11	0.79
								1.49	1.31		0.47	0.54
								3.76	1.16		0.05	0.33
								0.3	0.95		0.35	0.66
								0.83	0.55		0.45	0.52
								1.32	0.88		0.2	0.41
								1.07	1.46		1.21	0.68
								1.39	1.7		2.68	1.39
								0.34	0.71		0.83	1.72
								2.26	0.09		1.5	0.05
								5.71	0.13		0.22	1.06
								0.38	0.04		0.38	0.61
								0.59	1.39		0.39	0.56
								0	0.1		0.65	0.04
								1.49	1.19		1.75	0.71
								1.37	0.17		1.23	0.35
								0.64	0.64		0.8	0.07
								0.07	0.97		0.16	0.05
								3.2	0.31		1.41	1.01
								0.2	0.74		1.19	1.33
								2.77	0.57		0.34	0.44
								0.98	0.1		1.27	0.12
								2.85	1.18		0.6	2.84
								0.2	0.03		0.5	0.45
								0.05	0.14		1.28	1.24
								0.37	0.32		1.34	0.19
								2.89	0.35		1.16	1.34
								0.29	2.37		1.29	0.04
								0.53	0.89		0.34	0.91
								1.52	2.56		0.49	0.96
								0	0.17		1.44	1.52
								1.08	0.48		0.09	0.24
								0.05	0.75		0.18	1.63
								2.41	0.37		2.83	0.08
								0.22	0.33		1.26	2.05
								0.82	0.03		2.24	1.37
								0.04	0.14		1.13	0.93
								2.52	0.65		0.28	0.89
								1.06	0.04		0.38	0.38
								0.47	1.01		0.27	1.22
								0.37	0.57		2.13	1.17
								4.38	0.32		0.7	0.12
								1.55	0.88		1.07	0.55
								0.1	0.75		0.39	0.37
								1.27	1.06		0.58	0.37
								1.51	1.83		0.69	0.56
								0.97	0.98		0.26	0.55
								0.57	0.68		1.25	0.35
								0.05	0.35		0.11	0.12
								1.17	1.99		0.94	0.9
								1.16	1.37		0.96	1.05
								0.45	0.77		0.86	0.83
								0.95	0.06		2.52	0.47
								1.31	0.53		2.8	0.75
								2.65	0.53		0.62	1.33
								3.27	0.89		0.39	0.01
								0.22	0.32		1.19	0.64
								0.46	0.65		0.55	2.13
								0.16	0.18		1.16	0.29
								0.97	1.26		0.66	0.41
								0.87	0.32		0.17	1.68
								2.65	0.84		1.01	0.37
								0	0.59		0.04	0.2
								1.88	0.9		0.98	0.45
								2.49	1.14		0.63	0.21
								0.24	0.55		0.22	1.6
								0.64	1.99		0.04	1.3
								2.34	0.21		0.63	0.25
								0.75	0.89		0.51	0.12
								4.36	0.03		0.65	0.95
								0.05	0.72		0.79	0.16
								2.45	0.26		1.85	0.9
								0.6	1.3		1.19	0.66
								0.76	1.74		0.69	1.81
								0.51	0.35		2.35	1
								0.24	0.2		0.77	0
								1.54	0.07		0.38	0.52
								1.44	2.52		0.14	1.39
								0.49	0.19		1.33	0.41
								0.19	1.3		0.49	1.04
								0.03	0.42		0.42	1.79
								0.48	0.66		1.4	1.14
								1.74	0.57		0.33	0.41
								0.01	0.04		0.6	0.94
								0.88	1.28		0.58	0.35
								0.25	0.24		0.72	0.38
								0.15	1.05		1.26	1.45
								0.68	0.45		0.05	0.26
								1.27	1.64		0.04	0.9
								1.25	0.36		0.3	2.34
								0.87	0.84		2.07	0.62
								0	0.01		0.41	0.68
								0.55	2.2		0.38	0.05
								3.39	0.23		1.66	2.48
								0.32	0.63		1.28	0.36
								0.76	1.15		0.72	1.07
								0.21	1.25		0.15	0.34
								0.35	0.41		1.43	0.46
								2.91	0.91		0.7	0.61
								0.47	1.71		0.44	2.18
								1.07	0.09		1.04	0.43
								0.14	0.75		3.19	0.58
								0.95	0.4		1.1	1.32
								2.49	0.39		0.32	0.37
								3.8	0.49		0.66	2.05
								5.16	0.31		0.52	0.86
								3.85	0.87		0.04	2.34
								2.68	0.6		0.62	0.23
								0.94	0.09		0.68	0.06
								1.31	0.36		5.78	1.75
								0.94	1.17		1.31	0.91
								1.58	0.41		1.09	0.62
								4.35	0.52		0.93	0.07
								1.11	1.49		0.95	0.4
								2.04	0.37		0.12	0.94
								2.19	0.96		0.25	1.03
								3.46	0.97		0.94	0.93
								0.09	0.34		2.43	1.19
								0.53	0.04		1.05	0.03
								1.42	0.38		1.37	0.01
								2.33	2.19		0.33	0.06
								0.46	0.91		1.4	0.36
								0.01	0.2		0.71	0.45
								0.8	3.1		0.78	0.91
								2.11	1.63		1.23	1.2
								1.05	1.6		0.95	0.78
								1.86	1.05		6.63	0.51
								0.03	1.42		0.56	1.72
								0.38	1.8		2.75	1.03
								0.72	2.05		0.32	0.75
								1.31	1.35		0.83	0.75
								1.73	0.9		0.47	1.24
								4.17	0.2		0.16	1.48
								1.38	0.44		0.33	0.21
								1.66	0.87		0.76	1.13
								1.64	1.24		1.12	1.85
								0.54	4.05		1.13	0.38
								1.31	0.15		1.02	0.85
								2	1.06		5.03	0.72
								0.18	0.71		0.46	0.83
								0.77	0.45		0.95	9.09
								1.11	1.62		0.88	1.62
								0.94	0.92		0.98	0.43
								0.16	4.02		0.44	0.5
								0.5	0.69		0.91	0.53
								2.7	0.63		1.03	0.37
								1.07	0.13		2.14	0.82
								1.81	0.81		0.56	0.53
								0.02	1.58		0.31	0.36
								2.69	0.37		0.11	0.87
								1.28	0.2		0.37	0.3
								1.66	0.5		1.27	1.01
								1.32	0.09		1.94	0.27
								2.93	0.34		0.37	3.7
								3.08	0.99		0.27	0.2
								1.9	0.69		0.85	1.05
								0.95	0.4		0.09	0.67
								1.46	1.15		0.47	0.07
								1.72	0.12		2.13	0.86
								1.72	0.03		0.76	0.23
								1.37	0.13		0.06	0
								1.28	2.49		0.21	0.7
								0.79	0.66		0.04	0.54
								2.66	0.58		1.68	0.31
								1.06	1.6		0.95	0.24
								1.7	3.04		0.08	0.88
								0.44	2.14		0.03	4.16
								3.22	0.66		1.19	0.48
								0.89	1.03		0.34	1.51
								0.13	0.86		1.08	0.73
								1.23	0.52		1.59	1.41
								0.55	0.42		1.44	0.61
								2.26	1.74		0.9	0.97
								0.16	1.38		0.12	1.54
								1.71	1.89		0.8	0.77
								1.47	4.1		1.83	0.6
								0.75	0.5		0.85	0.92
								2.07	0.57		1.02	0.64
								1.44	1.15		0.32	1.06
								0.49	1.19		0.6	1
								1.6	1.07		0.59	0.4
								0.52	1.1		1.45	1.24
								1.51	1.34		1.23	1.27
								1.86	0.61		1.39	1.26
								2.01	2.01		0.36	0.75
								1.61	1.13		0.95	0.63
								0.99	0.56		0.03	0.44
								1.31	1.12		2.63	0.62
								1.87	1.59		0.76	0.06
								2.61	1.68		1.14	1.63
								1.22	1.21		1.22	1.41
								0.86	1.29		1.02	0.57
								1.08	2.56		0.67	0.17
								1.69	0.95		1.94	1.6
								1.38	0.99		0.22	0.33
								2.76	0.91		1.48	2.7
								1.2	0.41		0.31	1.66
								1.04	0.67		0.55	1.08
								1.27	2.29		1.24	0.31
								2.28	0.7		0.91	0.85
								2.05	1.19		1.12	1.33
								1.56	0.17		0.01	0.34
								0.36	3.19		0.05	0.65
								0.88	0.95		0.49	1.54
								4.14	0.09		1.86	0.04
								6.44	0.58		0.04	1.58
								0.75	1.65		0.98	1.07
								0.49	1.22		1.08	0.96
								3.35	0.48		1.03	0.82
								0.66	1.12		0.02	1.02
								3.4	2.51		0.66	0.72
								0.77	2.56		0.89	0.5
								1.1	2.81		1.18	0.77
								0.46	1.16		1.3	0.43
								0.15	1.38		1.16	2.4
								0.01	0.11		0.22	0.97
								1.7	0.22		1.1	0.29
								0.51	1.18		1.73	0.37
								0.42	0.73		1.21	1.13
								2.44	0.4		1.43	0.26
								1.73	1.69		0.04	0.32
								0.22	0.08		1.89	0.5
								0.46	1.66		0.04	0.5
								0.86	0.89		1.41	0.87
								0.22	0.59		0.72	1.05
								1.2	4.61		0.4	1.12
								0.86	0.58		0.1	1.92
								0.8	0.12		0.3	0.59
								1.18	0.46		0.24	1.13
								1.3	0.45		0.99	0.1
								0.45	0.45		0.2	1.36
								1.59	2.38		0.28	3.05
								0.27	1.64		0.83	0.51
								0.94	1.98		2.67	0.4
								0.92	0.27		0.59	1.32
								1.02	0.68		1.3	0.44
								1.16	0.7		0.09	0.36
								1.2	0.41		1.26	1.03
								0.25	0.81		0.87	1.23
								0.39	0.1		0.64	1
								4.07	0.05		0.6	0.09
								1.25	1.15		0.39	0.48
								2.97	0.49		0.7	0.08
								0.07	1.41		0.03	0.79
								2.6	0.14		0.07	0.02
								1.65	0.11		2.17	1.29
								1.97	2.29		1.02	0.47
								0.41	0.99		1.52	0.32
								1.23	1.13		0.33	1.35
								0.98	0.9		1.48	1
								0.99	0		0.71	0.25
								0.71	2.27		0.94	0.73
								0.21	0.15		0.93	0.94
								0.34	0.36		0.99	0.48
								1.03	0.08		1.35	0.72
								1.41	1.54		0.04	0.38
								0.93	0.31		0.07	1.81
								1.05	1.12		0.53	0.69
								0.42	0.36		0.28	1.1
								1.59	0.08		0.17	0.33
								0.8	0.17		1.19	0.1
								0.15	0.53		0.98	0.46
								0.78	1.72		1.38	1.11
								1.11	0.05		1.17	0.94
								2.58	0.31		1.6	0.69
								0.72	0.83		1.19	3.25
								1.07	0.38		1.06	1.1
								1.13	0.82		0.27	1.12
								2.14	0.63		0.32	2.91
								0.07	0.53		0.15	1.2
								1.28	1		1.57	1.49
								0.94	1.65		2.25	0.5
								0.35	0.37		1.29	0.53
								0.23	0.89		0.56	0.77
								0.46	1.65		0.16	1.25
								0.12	2.62		1.55	1.01
								0.9	1.02		0.16	0.13
								0.21	0.5		0.03	0.05
								1.02	0.54		1.22	0.85
								1.55	0.64		0.76	0.05
								0.78	1.29		0.39	0.1
								2.35	1.16		0.51	0.02
								0.04	1.82		0	0.69
								1.48	1.52		0.75	1.15
								0.29	0.93		0.25	0.2
								1.25	0.1		0.53	0.76
								0.35	0.97		0.32	0.6
								1.43	1.16		0.34	0.7
								0.91	0.36		0.49	0.6
								1.36	1.94		0.63	0.29
								1.95	0.59		0.05	0.14
								0.47	0.99		0.43	0.05
								0.46	0.1		1.08	0.05
								2.44	0.67		0.41	0.93
								1.37	0.44		0.12	1.3
								0.83	1.37		1.12	0.73
								2.12	0.36		1.27	2.89
								1.14	2.3		0.39	0.36
								1.46	1.08		0.47	3.13
								1.72	0.81		0.29	1.9
								1.15	0.15		0.83	0.34
								0.44	2.09		0.12	1.43
								0.68	1.26		0.72	1.23
								0.74	0.19		0.24	0.18
								0.68	0.89		0.05	0.67
								1.44	1.25		0.65	1.37
								0.91	0.44		1.15	0.36
								0.2	1.52		0.74	1.53
								2.33	0.05		1.2	1.58
								1.21	1.02		2.31	0.21
								3.24	0.89		1.21	0.24
								1.86	0.45		0.88	1.02
								2.41	0.13		0.18	1.91
								0.55	0.99		1.4	2.16
								0.4	0.45		0.79	1.06
								0.05	1.19		0.43	1.26
								0.37	0.06		0.79	1.14
								1.74	0.17		0.05	0.41
								0	1.16		0.21	0.31
								0.64	1.03		0.66	0.95
								0.06	1		0.19	0.4
								1.34	0.7		2.72	1.27
								2.01	0.94		0.9	1.43
								0.89	0.57		0.03	1.21
								1.75	1.23		0.42	0.42
								1.21	0.41		0.37	1.2
								0.29	1.03		1.41	0.38
								2.54	0.98		0.1	1.46
								1.33	0.56		1.25	0.5
								0.29	0.37		0.89	0.44
								2.12	1.28		0.22	1.16
								1.88	0.37		0.07	0.08
								0.44	1.16		0.13	0.04
								1.09	0.22		0.95	0.34
								1.33	0.64		0.61	0.58
								1.65	0.31		1.08	0.82
								1.73	1.36		0.71	0.44
								2.38	1.18		0.61	0.33
								1.37	0.45		1.17	0.51
								0.24	0.45		0.03	1.51
								1.68	0.98		0.16	0.5
								0.04	1.26		1.26	0.46
								0.04	1.38		0.65	1.26
								1.25	0.13		1.89	0.73
								5.22	0.77		1.36	1.09
								0.11	0.64		1.14	0.61
								0.08	0.55		0.11	0.66
								0.64	1.17		0.58	1.06
								2.2	0.9		0.58	1.17
								1.17	1.44		0.63	0.35
								0	0.02		0.5	0.98
								1.87	0.22		0.56	0.18
								0.04	1.94		0.22	0.2
								0.7	2.38		1.19	0.01
								1.33	0.01		0.04	1.64
								4.31	0.05		0.51	1.66
								0.69	0.35		0.31	0.05
								0.02	1.67		0.51	0.11
								2.68	0.43		0.64	0.38
								0.04	0.11		0.59	0.7
								0.54	0.33		0.37	0.95
								2.07	0.54		1.61	0.6
								0.3	0.29		1.72	0.1
								1.2	3.01		0.47	0.08
								1.02	0.45		0.44	0.84
								0.12	1.42		0.42	0.7
								0.04	3.6		0.01	0.75
								1.22	2.55		1.13	1.12
								0.2	0.05		0.86	0.08
								3.06	1.35		1.35	0.5
								0.03	0.68		1.4	1.2
								0.24	0.53		0.12	0.18
								0.01	0.09		1.89	0.11
								3.31	0.81		0.45	1.45
								1.3	0.25		0.51	0.32
								3.28	2.95		0.29	0.33
								0.59	0.8		0.5	0.57
								2.98	2.33		0.53	0.98
								0.83	0.73		0.51	0.27
								0.58	0.27		0	0.66
								0.76	0.37		1.27	1.16
								1.68	1.72		0.41	0.07
								2.68	1.23		0.96	1.05
								2.46	0		0.29	0.4
								2.4	0.05		0.76	1.12
								2.58	0.65		0.62	0.35
								3.6	1.83		0.51	0.39
								0.77	0.21		2.02	0.47
								3.13	1.99		0.23	0.58
								3.05	0.38		0.88	0.37
								2.09	1.38		0.26	0.94
								1.14	3.8		1.36	0.01
								0.09	1.06		0.1	0.76
								1.76	0.2		0.41	2.64
								0.48	0.88		0.44	0.5
								1.92	1.35		0.91	1.02
								0.33	3.72		1.06	0.35
								0.11	0.05		1.03	0.43
								3.01	0.43		2.24	0.2
								3.98	1.01		0.84	2.05
								1.55	0.45		0.08	0.59
								4.1	0.36		0.95	0.14
								0	0.45		0.05	0.11
								0.97	0.24		0.54	0.77
								0.51	0.19		1.17	1.15
								1.17	0.02		1.66	1.1
								0.13	0.13		0.36	0.59
								4.92	4.94		0.52	0.15
								1.97	0.01		1.24	0.38
								1.69	0.05		0.72	1.8
								1.38	0.1		0.39	2.75
								0.86	0.79		0.39	0.32
								1.03	0.14		0.76	0.7
								0.73	2.25		0.27	0.34
								3.38	3.17		2.35	0.55
								0.16	0.98		0.51	2.13
								1.42	0.18		1.46	0.22
								1.35	0.49		0.01	0.48
								1.79	0.24		0.39	1.94
								0.27	0.84		0.04	1.69
								1.75	1.04		0.23	0.37
								1.86	2.26		0.28	0.35
								2.13	1		1.25	0.12
								1.51	0.49		2.29	0.02
								0.81	0.45		0.51	0.67
								1.34	0		0.27	0.54
								1.27	0.41		0.94	1.92
								1.05	0.22		1.11	1.03
								1.28	0.94		0.84	2.5
								1.15	0.79		0.94	1.12
								1.47	1.29		1.19	1.49
								0.71	0.07		0.07	1.84
								1.01	2.49		0.05	2.86
								0.35	0.68		0.4	1.19
								2.92	3.21		0.47	1.06
								1.23	4.29		0.8	1.17
								2.6	0.8		1.28	1.58
								1.07	0.07		0.93	0.25
								2.68	0.11		0.91	1.83
								1.22	0.43		1.03	4.81
								1.06	0.23		1.75	1.31
								1.05	0.01		0.05	0.53
								1.67	0.26		0.58	0.57
								0.71	0.9		0.13	0.21
								0.69	1.11		0.07	0.76
								2.5	2.51		1.35	0.11
								2.95	2.79		1.34	1.75
								1.51	0.24		0.01	2.69
								1.61	0.26		0.63	0.07
								1.15	2.92		0.13	3.03
								0.82	0.34		0.04	0.44
								0.8	0.42		1.22	0.46
								0.9	0.46		0.49	1.4
								1.83	0.84		0.37	0.91
								1.83	1.46		1.09	1.5
								1.48	0.65		0.32	0.76
								0.99	1.34		2.01	0.79
								1.08	1.32		0.54	0.75
								3.26	0.47		0.05	0.05
								1.26	0.21		0.19	0.62
								0.64	0.2		0.03	0.59
								2.28	2.17		0.39	1.37
								1.93	0.08		0.91	1
								1.56	1.16		0.17	0.85
								1.1	1.03		1.44	0.91
								2.3	0.01		0.16	0.08
								0.89	0.43		0.09	1.47
								0.92	0.46		0.11	2.12
								0.09	1.5		0.23	0.04
								0.03	0.39		0.48	0.65
								0.92	0.8		1.39	1.6
								1.34	1.73		1.07	1.09
								0.46	1.7		0.68	2.64
								1.85	1.32		0.2	1.38
								0.9	0.76		0.11	1.51
								1.01	0.42		0.76	0.41
								0.47	0.67		0.99	3.77
								2.03	0.02		0.84	0.36
								2.39	2.98		1.5	1.54
								0.7	1.37		1.25	1.04
								0.46	0.3		0.02	0.67
								0.25	0.28		0.83	1.25
								1.89	0.34		1.4	0.52
								0.97	0.51		0.32	0.01
								0.23	1.21		1.24	0.01
								0.54	0.57		0.05	2.14
								0.29	0.26		0.02	0.71
								2.66	0.34		0.22	0.34
								0.75	0.78		0	0.81
								2.42	0.81		0.56	1.72
								1.04	0.13		1.29	0.47
								0.44	1.02		0.63	0.16
								0.09	0		0.9	0.24
								0.85	0.48		0.04	0.37
								2.38	1.46		0.11	0.13
								0.75	0.41		0.45	0.36
								0.36	0.48		0.86	1.54
								2.32	0.4		2.03	2.11
								0.87	0.51		1.98	0.52
								1.17	0.57		0.75	0.26
								1.73	1.07		0.05	2.44
								0.41	0.4		3.25	1.24
								0.55	0.24		0.08	0.33
								0.05	0.3		2	0.82
								0.22	0.44		0.88	0.28
								0.01	0.25		1.22	0.04
								0.26	0.37		1.78	1.37
								0.8	0.16		0.5	1.06
								1.12	2.52		0.82	1.3
								0.07	0.36		0.37	0.54
								0.8	0.93		0.58	3.27
								3.78	1.16		1.06	1.36
								0.76	0.13		1.81	0.88
								1.02	1.5		1.46	0.67
								0.23	0.41		0.93	0.08
								0.06	3.22		0.22	1.09
								0.93	0.04		4.26	3.21
								0.8	0.61		0.34	0.11
								0.19	0.74		2.54	1.09
								1.8	0.35		0.37	0.57
								1.32	1.15		0.18	0.32
								0.1	0.37		0.38	0.44
								2.7	1.01		1.15	1.28
								0.88	0.17		0.44	0.49
								0.17	2.39		1.1	1.91
								0.24	0.34		1.43	0.01
								0.4	0.84		0.67	0.26
								1.53	0.52		1.27	1.15
								0.9	0.04		0.04	0.62
								1	1.27		0.13	1.25
								3.44	2.32		1.44	0.5
								3.36	0.71		0.37	0.59
								2.85	1.46		0.34	0.17
								0.34	1.83		0.05	1.91
								1.27	0.78		0.99	0.26
								2.3	2.64		0.57	0.9
								2.58	0.62		0.07	0.67
								0.05	0.28		1.56	0.7
								0.39	2.96		0.32	1.83
								1.64	0.78		1.96	1.63
								0.19	0.49		0.7	0.84
								0.39	1.52		1.03	0.92
								0.22	1.17		0.05	1.65
								0.37	0.36		0.69	0.97
								0.5	0.12		0.25	0.56
								2.81	1.51		0.37	0.39
								0.17	1.08		1.1	0.37
								1.63	0.54		0.76	0.19
								0.5	0.2		0.03	0.11
								0.8	0.77		0.51	0.41
								1.95	0.61		0.27	0.37
								1.13	1.29		0.34	0.15
								1.45	0.01		2.75	0.67
								0.58	0.35		0.14	0.29
								1.11	2.57		0.3	1.08
								1.07	2.24		0.28	1.95
								0.36	0.5		1.49	0.4
								1.63	1		3.18	0.38
								0.88	0.35		0.37	0.03
								1.28	2.02		0.41	0.41
								0.47	0.93		2.14	0.38
								0.49	0.68		0.4	1.27
								0.64	0.68		0.35	0.67
								1.51	1		0.55	0.59
								0	1.22		0.04	0.28
								2.82	3.27		1.5	0.04
								3.12	0.16		0.02	0.08
								1.8	0.26		0.39	0.18
								1.8	0.39		3.62	0.84
								2.31	2.54		0.66	1.88
								3.1	2.94		1.39	1.22
								3.29	0.34		0.04	0.14
								0.94	1.42		0.13	0.17
								2.43	0.49		1.46	0.03
								3.48	0.24		2.19	0.44
								2.49	0.85		3.71	0
								3.09	0.46		1.23	0.13
								3.01	0.77		0.84	0.63
								1.95	1.63		1.46	0.44
								3.1	0.79		0.05	0.15
								0.27	0.95		0.12	0.71
								0.06	0.71		0.91	0.31
								2.31	0.63		0.45	0.4
								1.56	0.22		0.21	1.62
								2.05	1		0.74	0.56
								1.33	1.47		0.85	0.68
								2.56	4.64		1.69	0.32
								0.02	0.74		0.98	0.5
								2.4	0.38		1.16	0.03
								2.59	1.82		0.24	0.11
								1.23	0.74		0.49	2.57
								0.62	1.43		0.36	1.51
								0.26	2.33		1.09	0.41
								1.74	1.31		1.92	1.42
								1.99	0.34		0	1.06
								1.24	0.64		1.35	0.25
								3.41	0.13		1.39	1.44
								0.03	1.11		2.31	0.56
								0.01	0.39		0.35	0.02
								2.61	0.34		0.9	0.38
								2.45	0.33		0.92	0.33
								1.72	1		1.17	0.37
								3.7	0.52		0.12	1.34
								0.63	0.76		0.37	1.42
								0.39	0.72		1.41	0.01
								1.4	0.71		0.86	0.44
								2.07	1.99		0.38	0.63
								0.33	1.15		0.5	0.12
								1.5	0.11		0.8	0.69
								4.08	0.37		0.95	0.44
								0.39	1.22		0.91	0.1
								0.03	0.89		1.68	0.31
								0.36	0.49		1.25	0.26
								1.47	1.19		0.58	1.57
								1.32	0.38		0.46	1.66
								0.87	0.33		1.68	0.62
								0.36	1.03		2.26	0
								1.3	1.62		0.8	0.95
								2.35	1.3		0.6	0.44
								1.95	1.19		0.67	0.36
								1.35	0.16		0.81	0.42
								1.85	0.68		0.88	0.51
								0.25	0.46		0.5	0.07
								2.9	0.54		3.79	0.05
								0.37	0.91		1.02	0.09
								0.74	0.82		1.85	0.38
								0.45	1.32		3.58	0.23
								0.63	0.14		6.21	0.05
								0.05	0.99		0.29	0.65
								2.73	0.32		0.68	2.84
								0.85	0.05		0.6	0.43
								0.86	1.55		0.5	0.01
								0.49	0.92		0.53	0.46
								1.75	1.44		1.42	2.79
								0.44	0.67		0.36	0.37
								2.06	0.53		0.06	0.03
								1.67	0.93		0.37	0.35
								2.32	0.64		1.81	0.14
								4.09	0.09		0.49	0.75
								0.48	0.08		0.36	0.96
								1.79	0.93		0.76	0.49
								0.99	1.06		1.06	0.62
								1.92	0.83		0.8	0.96
								0.41	0.44		0.45	1.44
								0.78	2.53		0.79	0.09
								1.37	0.11		0.05	3.49
								0.83	1.58		0.51	0
								1.58	1.41		0.84	0.43
								0.22	0.37		0.05	0.82
								1.76	0.8		0.73	1.45
								2.21	0.5		1	0.05
								0.24	2.26		0.55	0.74
								1.82	1.22		0.73	0.05
								0.9	1.05		0.67	0.54
								0.12	0.9		0.21	0.24
								1.41	3.01		0.8	1.26
								1.78	1		1.08	1.25
								1.34	1.71		0.36	0.04
								0.38	1.49		0.59	0.37
								0.79	2.11		1.66	0.4
								0.74	0.89		0.44	0.79
								0.94	0.07		0.35	0.31
								1.22	1.44		1.68	0.05
								1.93	0.69		1.25	0.93
								1.95	1.39		0.35	2.94
								1.6	1.76		0.37	2.7
								0.94	0.74		1.5	1.5
								0.29	2.42		0.53	0.77
								0.56	1.52		0.89	0.37
								0.58	1.22		0.07	0.42
								1.66	1.74		1.16	1.14
								1.03	2.01		0.47	0.09
								0.05	2.08		1.59	0.79
								1.14	1.89		3.14	0.9
								1.65	1.72		2.97	0.52
								1.02	0.51		0.05	0.73
								0.37	0.17		2.37	0.75
								1.92	1.69		0.31	0.11
								0.83	0.59		0.99	0.31
								0.25	0.56		1.73	1.23
								0.33	1.23		0.1	0.99
								0.22	0.55		1.2	0.3
								2.5	1.03		0.66	0.49
								0.07	0.32		0.35	0.13
								0.46	1.13		0.32	0.04
								1.7	2.19		0.36	0.02
								1.53	1.36		2.24	0.43
								2.94	3.66		0.01	0.38
								0.16	1.08		0.04	0.02
								0.48	0.88		0.62	0.02
								1.74	1.16		0.29	1.39
								1.25	2.74		1.71	0.1
								1.71	1.29		0.23	0.15
								0.51	0.43		0.42	0.34
								1.07	1.97		0.35	0.14
								0.5	1.86		0.37	0.42
								2.31	2.25		0.46	0.91
								2.35	2.2		1.03	0.43
								2.06	1.66		1.87	1.06
								2.05	1.17		1.04	0.25
								1.48	2.55		0.1	0.82
								1.88	0.11		0.96	1
								2.68	0.04		0.21	0.78
								1.69	0.45		0.83	1.4
								2.04	0.79		1.2	0.22
								1.46	1.51		1.88	0.86
								1.14	0.04		0.94	0.77
								1.07	2.15		0.04	0.04
								0.99	0.92		1.57	1
								1.27	1.77		0.65	0.34
								0.31	0.38		1.34	2.39
								0.48	0.1		0.25	1.94
								1.26	0.37		0.72	0.56
								0.5	1.06		0.16	0.26
								0.71	2.83		0.6	0.49
								0.42	0.95		1.8	0.12
								0.47	0.27		0.33	1.57
								0.03	1.29		0.42	0.21
								1.04	4.79		1.74	0.57
								2	0.61		0.13	0.38
								0.11	1.72		0.16	0.46
								0.25	0.53		0.08	0.44
								0.47	0.68		0.7	0.34
								0.75	1.86		1.37	0.1
								0.16	1.51		0.85	0.76
								2.67	2.91		0.17	0.48
								0.34	0.3		0.54	0.04
								0.19	3.47		0.89	1.78
								1.71	0.43		1.31	0.08
								2.48	1.11		0.84	0.04
								0.64	0.15		0.14	0.2
								0.66	2.03		0.45	0.51
								0.42	0.71		1.52	0.29
								1.89	0.33		0.06	1.85
								0.42	1.81		0.29	0.79
								2.15	1.41		0.26	1.11
								0.05	0.62		1.4	0.37
								2.6	1.61		2.65	0.23
								0.05	1.21		0.62	0.46
								2.42	1.31		0.39	0.45
								0.12	1.42		0.19	1.26
								1.26	2.08		0.46	0.04
								1	0.27		0.62	0
								0.48	0.41		0.92	0.19
								0.38	0.47		0.51	0.93
								0.49	0.43		2.71	0.3
								0.37	0.74		1.39	0.3
								0.94	1.49		0.02	0.79
								0.01	1		1.02	0.51
								0.87	1.59		0.69	0.15
								1.06	0.96		1.38	0.81
								1.43	1.37		1.13	0.66
								0.45	0.67		0.69	0.24
								0.49	0.95		0.74	0.51
								0.81	0.01		0.02	1.98
								0.77	0.13		1.27	0.86
								0.41	0.24		0.65	0.58
								0.05	2.38		0.28	0.05
								0.25	0.73		0.2	1.46
								0.06	0.59		0.67	0.43
								2.76	0.21		0.37	0.05
								0.47	3.01		0.04	0.03
								2.45	0.2		1	1.26
								0.06	0.16		0.41	0.61
								0.21	1.27		0.3	0.14
								0.56	1.02		1.16	0.03
								0.78	0.8		0.62	0.74
								0.95	1.59		1.32	1.23
								0.8	0.36		0.52	0.08
								1.41	0.99		1.85	0.32
								0.31	0.36		1.16	0.11
								1.86	1.61		0.37	1.38
								1	0.51		1.35	0.35
								0.62	1.29		0	1.13
								0.49	1.16		0.54	0.82
								2.06	2.19		1.14	3.99
								0.72	0.5		0.02	0.33
								1	1.07		0.73	0.53
								0.11	0.39		0.26	0.28
								0.59	0.43		1.13	0.84
								1.15	1.91		0.05	1.95
								0.34	1.88		0.3	2.23
								0.39	0.3		0.49	0.01
								0.76	0.38		0.22	1.57
								1.15	0.41		1.3	0.79
								1.56	0.04		1.06	0.95
								0.53	2.39		2.02	0.26
								1.03	0.38		1.45	0.89
								0.78	0.59		1.07	1.27
								0.48	0.36		0.6	0.15
								2.26	0.38		0.3	2.18
								0.5	0.62		1.04	0.56
								1.21	0.79		0.54	0.4
								4.32	0.3		0.53	0.07
								0	1.06		2.06	1.04
								1.71	0.38		1.4	0.08
								1.88	1.6		0.4	0.21
								0.22	1.03		0.79	3.14
								2.76	0.84		1.05	0.04
								0.13	1.09		1.11	0.6
								0.38	0.34		0.64	0.29
								0.14	0.73		0.31	0.15
								0.97	0.36		0.01	0.05
								0.15	0.5		0.37	0.09
								0.04	0.19		0.26	0.06
								2.07	0.72		0	0.05
								0.05	0.78		1.17	0.82
								0.49	1.73		0.59	0.29
								0.28	0.1		0.05	1.16
								1.63	0.97		0	0.1
								0.18	0.37		1.43	1.42
								0.35	1.77		0.63	0.52
								0.49	0.3		2.07	0.05
								0.8	0.05		0.91	0.98
								1.04	2.58		1.29	0.54
								0.43	0.84		1.56	0.34
								0.43	0.46		0.4	3.61
								2.57	1.27		0.9	0.95
								0.96	0.23		0.55	0.19
								0.72	0.38		0.14	0.08
								0.94	0		0.63	0.28
								0.56	2.2		0.96	0.04
								0.49	2.01		0.12	0.98
								1.3	1.05		0.29	2.8
								0.63	1.74		0.48	0.29
								0.79	0.95		1.3	0.62
								1.79	0.97		0.35	0.39
								0.11	4.71		0	0.16
								0.77	5.18		0.27	0.39
								1.01	1.58		0.3	0.46
								0.28	1.51		0.03	4.08
								0.27	0.49		1.13	0.04
								1.76	0.55		0.39	0.37
								2.78	3.21		0.47	0.56
								2.22	0.33		0.89	0.92
								1.3	1.01		1.34	0.24
								1.56	0.53		3.21	1.71
								0.48	0.37		0.78	1.78
								0.64	0.3		0.37	0.39
								0.49	0.34		0.46	0.92
								2.15	1.66		0.65	1.14
								0.32	2.11		0.7	1.16
								2.04	0.26		1.08	0.82
								0.38	2.31		0.41	0.68
								1.33	2.5		0.09	0.47
								1.72	0.73		1.32	0.43
								0.65	0.47		1.97	0.39
								1.25	4.36		0.56	0.64
								0.96	0.11		0.42	0.64
								0.23	0.5		0.07	0.78
								1.06	0.43		1.24	0.79
								0.8	0.22		0.05	0.87
								0.21	0		0.95	0.33
								1.28	3.2		0.1	1.44
								1.34	2.64		0.18	0.27
								0.89	1.22		0.12	0.5
								0.63	0.09		0.08	0.6
								1.15	1.09		2.23	0.34
								1.38	0.03		1.39	1.24
								0.51	1.76		0.11	0.64
								0.68	1.21		1.14	0.51
								1.07	0.54		0.85	1.89
								1.19	0.52		0.64	0.58
								0.75	3.89		0.37	0.68
								0.55	0.04		0.46	0.78
								3.4	0.03		0.64	0.05
								0.52	0.07		0.67	0.34
								0.45	0.72		0.16	0.36
								0.95	0.38		1.43	0.53
								0.52	0.98		2.57	2.02
								2.91	1.17		0.28	0.78
								1.11	0.29		2.26	1.01
								1.84	0.21		2.65	1.04
								0.78	0.67		0.98	1.15
								0.51	1.87		2	0.4
								2.68	1.14		2.8	2.55
								1.7	0.75		1.22	1.53
								0.58	3.06		2.67	1.7
								0.03	2.64		0.22	0.61
								1.32	0.86		0.7	0.15
								0.92	2.3		0.95	0.32
								0.25	1.33		1.95	1.31
								0.69	3.04		0	0.4
								0.15	0.75		3.01	1.69
								1.63	1		1.67	1.32
								1.47	4.62		2.38	0.39
								1.15	0.38		3.04	0.83
								1.18	1.81		0.44	0.35
								0.99	2.41		1.31	0.87
								1.1	0.73		2.08	0.11
								1.03	0.1		0.57	1.09
								0.91	2.58		1.48	0.31
								0.46	0.49		1.1	1.91
								0.24	1.05		4.03	0.38
								1.14	4.01		0.3	1.61
								0.82	0.6		0.54	0.93
								1.13	0.31		0.8	1.59
								0.13	0.83		0.95	0.33
								0.82	0.13		1.3	1.41
								1.12	0.5		2.39	2.17
								2.18	0.7		2.12	0.73
								1.02	0.84		2.45	0.86
								0.99	0.45		0.36	1.3
								0.68	0.35		1.34	2.82
								0.42	0.62		0.5	0.39
								0.77	0.34		0.3	1.69
								0.88	1.89		0.07	0.23
								1.76	1.39		0.03	0.22
								0.83	0.63		1.72	0.03
								0.48	0.84		1.11	1.34
								0.34	0.42		1.81	1.03
								0.17	0.34		1.02	1.31
								0.14	0.78		0.62	0.87
								1.46	0.49		1.36	0.05
								1.48	0.79		2.39	0.48
								0.19	0.29		1.36	0.91
								1.26	0.68		0.5	0.29
								0.5	0.28		1.39	1.27
								0.35	0.24		0.16	0.34
								1.17	1.68		0.24	1.01
								0.67	0.69		0.29	0.85
								1.09	0.53		4.35	0.02
								0.35	0.38		0.26	0.44
								0.48	0		0.78	0.86
								1.58	0.46		1.2	0.19
								0.36	0.41		1.34	0.02
								1.14	0.45		2	0.5
								0.52	1.08		0.43	0.24
								0.79	0.36		1.57	0.41
								0.83	1.29		0.38	1.67
								1.04	1.88		1.26	0.7
								0.63	0.1		0.02	0.99
								0.86	0.48		0.52	0.47
[truncated: 96,994 more rows]

## Sheet: Figure 5D
Figure 5D. Over-expression of DNT-2FL in DNT-2 neurons increased synaptogenesis in PAM neurons
Data used to generate graphs in Figure 5D. See Table S2.
	Number of Syt-GCaMP6.0+ synapses in PAM neurons							Volume of syt-GCaMP6.0+ synapses in PAM neurons
	SMP Dendrite (top left in Figure 5D)			MB lobe (bottom left in Figure 5D)				SMP Dendrite (top right in Fig.5D)			MB lobe (bottom right in Fig.5D)
Genotypes	R58E02>Syt-GCAMP6.0, DNT2>+	R58E02>Syt-GCAMP6.0, DNT2>UAS-DNT-2FL		R58E02>Syt-GCAMP6.0, DNT2>+	R58E02>Syt-GCAMP6.0, DNT2>UAS-DNT-2FL		Genotypes	R58E02>Syt-GCAMP6.0, DNT2>+	R58E02>Syt-GCAMP6.0, DNT2>UAS-DNT2FL		R58E02>Syt-GCAMP6.0, DNT2>+	R58E02>Syt-GCAMP6.0, DNT2>UAS-DNT2FL
No. of synapses	3765	3868		2153	2600		synapse volume	0.39	1.3		0.86	1.11
	2736	3386		2159	2783			0.12	0.89		0.67	0.96
	4432	3432		2371	2808			0.27	0.06		0.27	0.28
	4240	4224		2291	3091			0.08	0.18		0	0.99
	3712	3786		2534	2432			0.41	1.28		1.03	0.39
	3960	3900		2860	2903			0.37	0.17		0.39	1.26
	4397	4014		2628	2433			0.1	1.23		1.2	0.86
	3065	2855		2659	2212			0.36	1.38		0.41	0.77
	3420	3812		2624	3347			0.31	0.56		1.26	1.58
	3293	2826		2522	3301			0.45	1.58		1.02	0.85
	5656	4690		3402	3821			0.41	0.69		0.91	1.53
	5308	4700		3559	4178			0.36	0.17		1.48	0.48
	4587	5376		2645	3507			0.18	1.39		0.75	0.61
	3843	4835		2692	3720			0.2	1.34		0.92	0.23
	3557	3636		2533	3545			0.1	1.02		1.03	0.39
	4752	4272		2589	3412			0.36	0.96		0.79	1.09
	4357	5202		3139	3277			0.38	0.18		1.46	0.79
	4043	5204		2373	3400			0.14	1.28		0.4	0.03
	4029	2056		2660	3342			0.09	0.93		0.09	0.82
	3937	3535		2629	3688			0.01	1.1		1.87	0.09
	4469	3338		2687	3568			0.35	0.05		0.95	1.31
	4099	4036		2820	3637			0.34	0.26		1.37	0.79
	4144	3803		2292	2978			0.37	0.28		0.7	1.12
	4993	2642		2321	3095			0.35	0.09		0.77	1.04
		4871			3585			0.3	1.38		1.08	1.43
		5129			3794			0.42	0.56		0.58	0.01
								0.39	1.09		1	1.16
								0.5	1.22		1.16	1.1
								0.27	0.97		0.79	0.77
								0	1.03		0.63	1.09
								0.66	0.95		0.78	0.85
								0.21	1.24		1.33	0.46
								0.38	0.67		0.68	0.75
								0.41	0.59		0.63	1
								0.4	0.98		2.72	0.21
								0.39	0.62		2.55	0.97
								0.41	1.32		0.89	0.72
								0.38	0.49		0.95	0.23
								0.4	0.41		0.61	0.19
								0.42	2.83		0.36	1.28
								0.36	0.98		0.38	0.6
								0.29	0.81		0.11	1.09
								0.31	0.57		0.19	1.06
								0.7	0.8		1.68	0.28
								0.92	0.82		0.87	0.34
								1.01	0.62		0.13	1.05
								0.18	0.49		0.01	1.26
								0.12	1.99		1.37	1.23
								0.24	0.96		0.25	0.72
								0.06	3.36		0.8	0.1
								0.84	0.93		1.01	0.81
								2.11	0.85		0.89	1.18
								2.57	0.26		1.2	0.83
								0.8	1.09		0.14	1.12
								0.84	0.91		1.25	0.48
								0.52	0.28		0.49	1.65
								0.48	0.87		0.75	1.68
								2.15	0.48		1.09	0.84
								0.93	0.59		0.71	0.35
								0.33	0.54		0.78	0.93
								1.58	0.33		0.92	0.88
								0.6	0.75		0.62	0.8
								1.35	0.65		0.61	0.75
								1.1	1.32		0.42	0.73
								2.27	1.44		0.63	4.08
								0.32	0.83		0.81	1.19
								0.04	1.15		0.54	0.58
								3.16	1.03		0.24	0.46
								0.25	0.7		1.01	0.98
								0.3	1.58		0.03	2.8
								1.71	0.83		1.51	1.37
								1.93	1.29		0.71	1.13
								2.71	1.55		0.94	0.62
								0.81	0.28		1.07	0.89
								3.16	1.46		1.07	5.29
								0.91	0.68		0.96	0.65
								2.99	1.34		0.26	1.52
								0.45	1.38		0.05	1.62
								0.8	0.6		0.57	1.12
								1.22	0.26		0.44	4.65
								0.42	2.02		1.58	0.77
								1	2.32		0.77	0.52
								0	2.25		1.31	2.4
								0.14	1.57		0.78	1.19
								0.78	0.79		1.32	0.6
								0.7	0.86		0.76	1.11
								1.8	0.35		0.99	3.36
								1.6	1.01		1.03	1.13
								0.14	2.19		1.36	0.24
								0.02	1.56		0.09	1.47
								0.11	0.53		0.38	0.9
								1.36	1.72		0.96	0.58
								3.41	0.12		1.01	1.45
								0.01	2.12		1.2	0.29
								1.98	1.64		1.25	1.64
								1.41	0.32		1	0.44
								3.15	0.37		0.75	1.72
								1.52	0.86		0.72	1
								0.41	0.5		0.28	1.39
								0.11	0.61		0.94	0.92
								1.42	0.24		0.75	0.53
								0.15	1.37		0.78	0.25
								0	0.31		1.43	0.38
								0.02	1.35		0.88	1.18
								0.98	0.94		0.71	0.34
								1	3.23		0.31	0.27
								0.21	5.27		0.16	1.31
								1.64	0.83		0.31	1.85
								1.28	2.33		1.23	1.06
								0.12	0.2		0.32	0.23
								0.49	0.04		0.82	1.06
								0.04	1.58		1.65	1.22
								1.18	2.21		0	3.59
								0.41	1.37		0.13	0.46
								0.4	0.04		0.05	2.15
								1.1	0.05		0.41	0.8
								0.54	0.37		1	1.01
								0.16	3.02		2.9	0.22
								0.99	1.77		0.23	0.5
								0.16	1.28		0.75	0.33
								0.71	0.42		3.46	1.74
								0.25	0.36		0.04	0.39
								0.22	1.84		0.26	0.96
								0.64	0.9		1.27	1.02
								0.86	2.63		0.12	0.7
								0.06	0		0.14	0.37
								0.58	0.12		0.77	1.01
								0.75	0.61		1.28	0.18
								0.42	0.99		0.64	0.64
								0.63	3.35		1.16	0.47
								1.28	0.95		2.21	4.23
								1.31	0.11		0.79	0.32
								1.48	1.96		1.06	1.02
								0.59	0.09		0.85	0.84
								0.9	0.94		3.61	0.19
								0.92	1.6		1.61	0.06
								1.42	1.71		0.07	0.75
								1.3	0.36		0.97	1.12
								1.47	0.57		1.78	0.33
								0.77	1.91		1.14	0.43
								0.77	0.75		2.11	1.12
								0.95	0.01		0.73	1.16
								1.01	1.49		2.19	0.36
								1.64	0.07		0.78	3.29
								1	2.53		1.75	0.88
								0.8	2.71		0.91	0.46
								1.26	1		1.95	0.76
								1.01	0.9		1.58	3.3
								0.48	0.16		0.06	1.31
								0.97	2.17		1.6	0.72
								1.23	0.04		0.49	0.8
								0.7	1.25		0.98	1.55
								1.17	0.39		0.56	0.17
								0.63	1.02		0.65	0.87
								0.58	0.04		1.9	1.45
								0.63	2.13		0.35	0.44
								1.45	1.17		1.78	3.48
								1.03	1.17		1.69	0.74
								1.49	1.09		1.13	1.5
								0.84	0.25		1.16	0.81
								0.66	0.72		1.68	0.33
								0.67	1.11		0.58	0.94
								1.22	0.02		1.14	0.04
								1.04	3.46		1.82	1.09
								0.51	1.51		2.16	1.13
								0.59	0.85		1.97	0.47
								1.01	0.57		0.43	0.8
								0.66	0.67		0.36	2.43
								1.1	0.54		0.46	1.27
								0.73	0.06		0.76	0.49
								0.49	0.05		1.19	1.02
								0.12	0.04		0.89	0.89
								2.53	0.67		0.72	1.08
								1.29	0.12		0.64	1.36
								2.14	1.31		1.35	1.03
								1.45	0.96		2.45	1.89
								1.47	0.64		1.98	1.13
								1.65	1.94		2.14	2.79
								2.55	0.9		1.92	0.81
								2.45	1.03		2.65	0.69
								0.51	0.18		0.74	1.09
								1.12	1.53		1	1.96
								2.68	0.29		0.5	1.74
								1.42	0.29		0.3	1.79
								4.45	1.06		0.2	0.69
								2.8	1.41		0.28	1.46
								1.3	1.21		1	2.3
								0.93	0.79		0.04	0.29
								3.33	1.03		1.28	1.9
								0.27	2.12		1.55	1.75
								0.02	0.03		0.03	0.08
								2.19	0.13		1.55	1.55
								0	0.34		1.05	1.72
								3.04	1.11		0.24	1.31
								0.25	0.51		0.15	1.14
								0	0.25		2.13	1.27
								2.25	0.74		0.07	0.22
								0.13	0.51		0.63	1.54
								0.35	2.13		1.45	0.18
								3.81	0.46		1.47	1.26
								0.82	0.1		1.64	0.77
								0.04	3.07		0.73	0.42
								0.69	0.34		1.23	4.66
								1.01	0.33		1.09	0.33
								1.19	1.4		1.49	2.48
								0.34	0.1		1.46	1.6
								0.41	1.38		1.19	0.48
								0.32	1.27		1.24	0.67
								0.93	0.66		0.62	0.69
								0.98	0.88		1.21	0.05
								0.96	0.46		0.43	0.21
								0.3	0.74		0.93	2.11
								2.43	0.19		2.56	0.4
								0.52	2.79		1.4	1.14
								0.84	0.72		1.11	1.07
								1.12	0.08		1.96	2.3
								0.08	0.17		2.92	1.97
								0.49	1.27		3.95	0.83
								0.45	2.62		0.35	0.61
								0.62	1.03		1.4	0.61
								1.65	0.39		0.34	1.21
								0.48	1.21		0.7	1.1
								1.03	0		3.04	1.69
								1.33	2.78		2.05	0.9
								0.2	0.03		1.23	1.46
								1.41	0.53		1.56	1.54
								0.04	0.02		0.76	1.12
								3.08	0.26		0.74	0.72
								0.99	0.84		0.87	1.43
								0.4	2.34		0.43	2.82
								0.14	0.94		0.98	0.88
								2.17	0.05		1.17	1.04
								1.37	0.17		0.35	2.28
								0.3	0.59		0.82	0.45
								0.04	0.41		1.27	0.84
								0.44	0.69		0.24	0.66
								0.24	1.1		0.7	0.96
								1.81	0.1		1.36	0.73
								1.2	1.46		0.08	0.42
								0.05	0.48		0.81	2.65
								0.63	0.62		0.36	0.88
								1.87	0.06		0.91	1.03
								0.61	1.45		1.33	1.24
								0.53	0		0.29	0.14
								0.45	0.62		0.79	1.28
								0.93	0.24		2.82	0.92
								0.02	0		0.36	0.6
								0.04	0.8		2.14	1.28
								1.87	0.09		1.15	0.28
								1.13	1.29		0.67	0.22
								0.89	2.06		0.14	0.95
								3.01	1.63		2.08	0.31
								0.1	1.18		0.17	0.88
								0.48	0.67		2.1	0.77
								0.9	0.25		1.92	0.98
								0.8	0.85		1.31	0.25
								1.2	0.79		0.67	0.96
								1.09	0.56		0.29	1.16
								0.24	0.38		1.2	3.48
								0.1	1.57		1.35	1.17
								0.94	0.65		4.38	1.29
								1.49	1.25		1	0.92
								1.36	1.22		1.81	2.31
								1.43	0.17		0.51	0.84
								0.05	2.26		0.99	2.36
								0.56	0.61		0.43	1.06
								1.31	1.29		0.83	0.52
								2.17	1.32		5.16	1.09
								0.35	2.64		1.36	0.04
								0.51	2.76		1.19	1.08
								0.23	2.27		1.84	1.29
								0.43	1.15		2.28	0.35
								0.29	1.24		3.14	0.41
								0.12	2.04		1.26	1.65
								0.68	0.96		1.1	2.34
								0.29	0.91		0.46	0.48
								0.39	0.23		0.03	1.98
								0.76	0.61		0.94	2.38
								0.04	0.05		1.2	0.82
								1.18	1.82		1.29	1.15
								1.29	0.51		0.72	0.43
								0.96	1.08		0.89	0.61
								0.46	0.98		0.31	0.93
								0.48	0.97		2.66	0.32
								0.49	0.25		0.09	0.21
								0.55	0.47		1.4	1.01
								0.05	1.8		0.4	1.32
								0.37	9.09		4.89	1.03
								1.66	0.02		0.71	1.21
								1.1	0.24		0.12	0.66
								0.5	0.33		1.38	0.52
								0.68	0.97		0.04	0.57
								0.18	0.83		2.64	0.55
								0.36	1.61		0.6	0.72
								0.35	0.02		2.99	1.78
								0.85	0.04		0.68	0.49
								1.51	0.31		0.94	0.46
								0.4	0.27		1.12	1.29
								2.22	1		1.08	0.92
								0.19	0.38		0.55	1.21
								1.81	0.59		1.08	0.38
								0.45	0.37		1.34	0.37
								0.06	0		0.9	0.08
								2.84	1.11		1.34	1.06
								0.43	0.11		1.44	2.22
								0.39	0.42		1.32	1.2
								0.58	4.23		0.6	0.2
								0.11	0.47		2	1.82
								0.81	1.35		1.13	1.98
								0.32	1.23		0.84	0.96
								0.3	1.01		1.22	0.31
								0.48	0.84		0.83	0.61
								1.21	1.3		0.85	0.61
								0.89	0.04		0.49	0.03
								0.08	0.62		0.53	0.46
								0.05	0.35		1.28	2.7
								0.12	0.6		1.28	0.61
								1.29	0.54		1.09	1.07
								0.44	1.06		0.25	1.34
								0.45	0.17		0.29	1.07
								0.69	0.49		0.32	0.7
								1.73	2.01		2.44	0.14
								0.26	1.67		2.81	0.49
								1.87	0.42		0.12	0.81
								1.32	0.03		1.82	0.11
								0.1	3.48		0.22	0.59
								0.84	0.06		0.1	0.77
								0	1.44		2.84	0.44
								0.44	0.88		0.32	0.4
								0.49	1.05		1.55	0.05
								0	1.44		0.33	0.31
								1.03	1.68		1.04	1.91
								0.09	0.72		0.37	1.64
								1.05	3.18		0.29	1.14
								0.42	0.49		2.84	0.96
								0.05	0.65		0.6	4.15
								0.11	0.56		0	2.66
								0.86	0.77		0.27	2.6
								1.02	1.38		1.01	2.03
								0.21	0.11		0.94	0.47
								0.09	0.71		1.59	0.42
								1.66	0.45		0.78	0
								0.62	0.32		1.29	2.07
								0.65	0.74		5.94	0.52
								0.74	0.37		0	2
								2.01	1.21		1.68	0.58
								0.81	0.63		2.04	0.95
								3.1	0.49		1.29	0.97
								1.53	1.46		0.6	0.42
								1.2	0.65		1.6	1.26
								0.36	0.34		1.31	1.51
								0.09	0.21		1.16	2.17
								0.08	0.37		1.68	1.01
								0.33	0.67		0.11	1.69
								0.04	0.22		1.3	1.12
								2.5	0.33		0.29	3.31
								0.28	0.06		0.59	1.63
								0.06	0.36		1.38	0.45
								0.98	0.39		0.28	0.5
								0.45	1.18		1.08	1.36
								0.47	0.4		0.23	0.52
								0.75	0.58		0.5	0.35
								0.08	1.13		0.49	0.51
								0.06	0.99		1.63	0.64
								2.53	0.73		2.02	0.9
								1.25	0.55		0.19	0.34
								1.04	0.34		0.34	0.26
								1.31	0.38		1.15	0.76
								1.06	0.21		0.71	0.36
								1.54	0.04		3.57	1.2
								0.63	1.04		3.78	0.37
								0.03	0.02		1.39	0.06
								0.17	0.34		0.57	0.91
								1.26	0.36		1.5	1.06
								1.26	1.01		0.3	0.55
								0.4	0.04		0.17	0.29
								0.44	1.64		1.41	0.81
								1.75	1.43		1.13	1.3
								2.03	2.93		1.18	0.91
								1.25	0.67		1.51	1.68
								1.77	1.27		1.92	0.56
								1.72	0.4		0.14	0.84
								1.06	1.24		1.3	1.23
								0.81	1.08		0.39	1.53
								0.49	0.25		0.07	1.51
								1.44	0.28		0.52	2.08
								0.29	0.44		0.41	0.75
								1.59	0.48		1.8	2
								1.38	1.69		1.35	2.32
								3.37	0.17		0.89	1.25
								0.55	1.21		2.23	1.67
								0.14	0.22		0.52	0.11
								1.87	0.03		0.35	1.03
								0.42	0.05		0.02	1.44
								1.31	0.46		0	1.68
								0.01	0.03		1.13	0.81
								0.69	0.97		1.76	1.55
								0.92	0.35		2.03	0.65
								0.44	1.5		1.47	0.84
								0.71	0.59		1.1	0.04
								0.62	0.72		0.03	0.43
								0.58	0.81		0.65	0.51
								0.45	0.03		2.8	0.4
								1.33	1.97		1.46	1.35
								1	0.34		0.71	0.87
								0.56	1.98		0.37	0.24
								0.5	3.99		1.45	1.24
								2.01	0.39		1.43	0.82
								0.33	0.63		0.02	1.13
								0.98	4.96		0.04	0.01
								1.39	0.72		0.74	0.2
								0.02	1		4.99	1.05
								0.45	1.62		3.94	0.91
								0.14	0.68		0.41	0.74
								0.07	0.07		3.54	1.24
								1.88	0		0.72	1.03
								0.53	1.68		2.84	0.78
								2.57	0.19		0.02	3
								0.82	0.85		0.91	0.68
								0.97	1.74		0.21	0.65
								1.14	0.97		0.45	1.15
								0.91	1.46		3.32	1.61
								0.73	1.31		0.74	0.04
								0.97	0.15		0.87	2.51
								0.85	1.38		1.2	0.96
								1.01	0.74		1.5	0.83
								0.81	0.89		0.19	0.6
								1.35	0.48		0.01	0.1
								0.45	0.27		0.87	0.41
								0.46	0.56		1.88	1.33
								0.44	0.09		1.07	0.68
								1.6	0.55		2.35	0.55
								0.64	0.29		0.11	0.67
								0.97	0.42		0.8	0.54
								0.76	0.44		3.78	0.96
								1.17	0.82		2.23	0.57
								1.16	0.88		1.12	1.16
								0.86	0.9		1.19	0.47
								0.35	0.16		0.53	0.82
								0.58	0.04		0.38	0.35
								1.58	0.03		0.24	0.34
								1.08	1.43		0.34	1.11
								0.74	0.6		1.68	1.04
								0.3	1.12		1.02	0.38
								0.53	1.26		0.5	1.27
								0.89	0.69		0.5	0.56
								1.11	0.37		0.56	1.5
								1.14	0.49		3.34	1.72
								0.49	0.32		2.54	3.37
								0.58	0.27		2.59	0
								0.99	1.69		4.45	0.5
								0.54	0.08		2.81	1.99
								0.81	0.31		0.68	0.9
								0.64	3.7		1.97	0.06
								0.15	0.09		1.06	1.98
								2.17	1.58		0.4	1.39
								0.64	0.25		0	0.19
								0.8	0.56		1.01	1.22
								2.27	2.67		0.57	0.1
								1.64	1.75		0.91	0.74
								4.03	1.25		0.17	1.32
								2.94	0.77		0.11	1.07
								0.61	0.59		0.36	1.43
								0.62	1.16		0.34	0.51
								1.8	0.23		0.52	1.25
								0.8	0.31		0.89	0
								1.19	1.39		2.97	1.13
								1.94	1.03		0.27	1.01
								2.25	1.81		0.46	0.68
								0.52	0		0.21	0.47
								1.65	0.13		0.26	1.09
								0.2	0.06		0.94	0.1
								1.71	2.1		2.1	0.05
								0.14	0.06		0.82	1.36
								0.5	2.17		0.29	0.39
								0.08	0.17		0.42	0.08
								0.36	0.7		0.1	1.95
								0.47	3.03		1.1	0.86
								0.4	0.21		0.13	0.29
								2.76	1.38		0.77	2.64
								2.13	1.69		0.54	0.31
								0.71	0.36		0.3	0.03
								0.48	3.64		0.15	0.86
								0.46	2.09		1.59	1.38
								1.15	0.05		0.3	1.16
								0.21	3.02		4.03	0.39
								0.31	1.03		1.62	0.92
								2.36	0.2		1.41	0.27
								2.03	0.94		0.62	1.33
								0.14	0.86		1.51	0.14
								1.67	0.22		1.16	0.62
								0.46	1.38		0.12	0.64
								0.21	1.06		2.65	0.44
								0.05	1.32		0.84	0.05
								3.1	1.35		0.76	0.54
								0.04	0.51		0.76	0.71
								0.43	0.7		1.11	0.64
								0.01	1.94		1.35	1.1
								0.99	0.23		0.81	0.18
								1.04	0.45		0.58	0.29
								0.25	0.56		1.21	0.47
								1.65	0.04		0.03	0.33
								0.3	0.51		0	3.21
								2.16	1.79		0.32	1.05
								0.12	0		0.05	0.05
								0.23	0.87		0.05	0.51
								1.2	0.18		0.64	1.14
								0.86	1.51		0.06	0.32
								0	0.38		0.72	1.55
								2.18	0.15		0.39	1.27
								0.51	0.85		1.65	9.15
								2.25	0.13		0.49	0.77
								2.24	0.79		2.61	0.94
								0.4	0.3		1.71	0.6
								3.96	0.75		1.24	0.82
								0	0.38		0.47	3.6
								1.44	0.53		0.38	1.31
								1.23	0.11		0.5	3.24
								1.48	0.46		0.84	0.76
								0.25	0.34		0.27	1.31
								0.32	0.35		0.74	0.25
								0.31	4.58		2.14	1.47
								0.11	0.48		0.9	0.02
								1.4	1.01		0.66	0
								1.21	2.63		1.05	0.33
								3.27	0.31		0.05	0.44
								0.49	0.05		3.11	0.08
								0.22	0.97		0.4	0.51
								0.68	1.79		0.55	0.55
								0.54	1.56		1.51	0.04
								0.68	0.03		0.62	0.23
								0.81	0.65		1.71	0.05
								0.56	1.33		3.06	0.59
								0.54	1.42		0.05	2.08
								0.58	0.05		0.05	0.09
								1.65	0.44		0.06	1.12
								1.07	0.5		0.78	0.04
								1.79	0.78		0.86	0.87
								0.82	1.63		0.75	0.88
								1.83	0.88		0.1	0.44
								0.68	0.16		0.94	1.45
								0.65	2.88		0.89	0.66
								0.53	0.71		2.28	1.17
								0.98	0.05		0.15	0.33
								0.96	0		0.06	0.5
								0.21	0.12		0.47	0.93
								0.8	0.05		1.21	1.91
								0.7	0.06		0.68	0.46
								0.68	1.26		1.21	0.71
								0.88	0.39		0.3	0.87
								1.18	0.13		0.33	0.26
								0.97	1.57		0.33	0.37
								1.27	0		0.41	0.09
								0.96	0.28		0.46	2.14
								0.55	1.13		1.43	0.12
								0.91	0.01		0.43	1.05
								0.83	1.4		1.83	0.44
								1.17	4.17		0.48	0.69
								1.31	1.33		0.39	0.75
								1	0.51		0.21	0.05
								0.89	0.51		0.18	0.7
								1.81	0.57		0.31	3.18
								0.11	1.02		0.09	0.86
								0.54	0.31		1.29	0.48
								0.71	0.05		1.34	0.47
								0.45	0.25		1.33	5.72
								1.02	1.01		0.47	0.09
								1.34	0.7		1.76	1.27
								0.6	0.97		1.02	0.23
								1.72	0.24		0.24	1.5
								0.95	1.11		0.55	3
								0.9	0.12		0.44	2.02
								0.55	0.65		0.62	1.32
								0.58	2.04		1.21	1.39
								0.55	0.53		0.62	1.29
								0.87	0.18		1.96	1.53
								2.3	1.3		1.27	0.58
								0.34	0.71		0.03	0.15
								0.94	0.03		1	0.98
								1.12	1.6		0.95	0.38
								0.58	0.62		2.72	1.32
								0.41	0.69		0.2	0.66
								0.51	0.1		0.39	0.52
								0.72	0.26		0	0.08
								0.02	0.15		0.43	0.24
								0.26	0.05		0.1	0.48
								0.55	1.27		1.08	0.1
								0.05	0.79		0.23	0.13
								1.05	0.12		0.25	1.69
								0.95	0.08		0.91	0.58
								0.12	0.52		0.37	1.07
								0.97	0.57		0.57	0.28
								0.73	1		1.16	0.61
								2.78	0.3		0.15	0.18
								1.9	0.04		1.81	0.4
								0.19	0.26		0.84	1.74
								0.98	2.13		0.26	1.05
								0.72	0.89		0.05	0.03
								0.73	0.09		1.54	0.92
								0.61	0.06		2.71	0.8
								0.75	0.25		1.35	0.7
								0.66	0.66		1.39	2.27
								0.43	0.52		1.4	0.53
								1.38	0.4		1.46	0.66
								1.49	1.21		0.04	2.23
								1.12	0.13		2.83	2.87
								0.69	5.3		0.92	1.37
								0.45	0.58		0.92	0.52
								1.37	2.18		0.25	1.4
								0.07	0.45		0.23	1.04
								0.43	0.05		1.41	1.25
								0.86	0.13		0.48	1.79
								2.13	1.46		0.16	1
								0.25	0.43		0.81	2.1
								1.78	1.17		0.05	0.92
								1.12	0.65		0.91	0.76
								0.7	0.51		0.39	0.69
								0.72	0.86		0.12	0.78
								0.86	0.21		0.14	2.75
								1.46	0.77		1.1	0.86
								0.43	0.7		0.65	0.26
								0.84	0.02		0.69	0.88
								0.34	0.04		0.49	0.06
								1.04	0.35		1.15	1.36
								1.37	0.05		0.35	0.11
								0.55	0.83		0.61	0.61
								0.74	1.57		1.14	0.74
								0.78	1.02		0.91	0.12
								0.72	2.06		3.95	1.55
								0.59	0.28		0.52	1.42
								0.88	0.72		0.32	0.88
								0.68	0.04		1.4	0.23
								0.64	0.32		3.69	0.67
								0.47	1.28		1.62	0.24
								0.9	0.35		2.41	0.04
								1.39	2.1		0.41	0.05
								1.12	1.47		0.85	0.03
								0.6	0.37		2.13	0.22
								0.65	0.6		0.2	0.68
								0.68	0.04		0.11	0.3
								1.17	0.87		0.25	0.36
								0.2	1.45		1.28	0.37
								1.04	1		1.34	0.91
								1.33	0.64		0.42	1.02
								1.43	0.5		0.48	0
								0.62	0.01		0.15	0.42
								0.74	0.09		0.07	0
								0.73	0.18		1.59	0.99
								0.63	2.24		2.21	0.57
								1	1.61		0.06	0.15
								0.65	0.05		0.5	0.49
								0.48	0.11		0.19	0.41
								0.56	0.63		0.1	2.39
								0.88	0.11		0.69	2.04
								0.44	0.37		0.01	0.45
								0.46	0.34		0.89	1.25
								0.82	0.86		0.14	0.47
								0.91	1.47		0.02	1.52
								0.72	1.63		0.29	0.32
								0.54	0.51		1.72	1
								0.61	1.31		0.24	0.34
								0.53	2.09		0.37	1.23
								0.97	1.4		1.06	0.33
								0.85	1.89		0.24	0.97
								0.54	0.43		1.06	0.41
								0.87	0.03		0.93	0.8
								1.02	1.69		6.61	0.03
								0.81	1.34		0.25	1.61
								0.66	0.02		0.52	3.74
								0.97	0.01		1.1	0
								0.44	0.98		0.22	0
								1.43	0.71		0.49	0.69
								0.91	0.1		0.37	0.91
								0.84	0.84		1.12	1.33
								1.08	0.38		0.18	6.17
								0.63	0.07		1.21	1.64
								0.53	0.07		1.64	0.9
								1.14	0.08		0.29	0.56
								0.68	0.51		0.15	0.47
								1.09	1.94		1.12	0.05
								1.38	0.61		1.3	0.09
								0.58	1.15		0.31	1.42
								1.32	0.14		0.38	2.42
								0.87	0.21		1	0.16
								0.92	0.22		1.03	2.84
								1.37	0.12		0.34	0.61
								0.58	0.56		1.09	0.67
								0.74	0.52		0.51	1.66
								1.55	0.04		0.97	1.02
								0.74	1.19		0.77	1
								0.55	1.2		0.03	1.92
								1.07	0.37		0.39	2.24
								0.59	1.39		1.09	1.28
								0.76	2.3		0.51	0.49
								0.71	0.85		0.04	0
								0.6	0.74		0.91	0.83
								1.38	0.66		1.81	2.65
								0.71	0.2		1.11	0.12
								0.89	0.35		0.13	1.33
								0.67	0.22		0.27	1.25
								0.95	0.13		0.29	0.49
								0.1	1.34		0.36	0.95
								1.67	1.18		0.36	0.74
								0.71	0.29		0.72	0.89
								1.12	0.38		0.43	0.39
								0.69	0.06		0	0.82
								1.27	0.06		0.05	0.63
								2.43	1.92		0.1	3.02
								0.1	0.11		0.54	0.97
								0.71	0.9		0.24	1.6
								0.75	0.35		0.03	1.02
								0.75	0.46		0.77	0.69
								0.63	1.14		0.35	1.33
								2.26	0.01		1.5	0.39
								1.08	0.03		0.82	0.31
								1.44	0.85		0.69	0.03
								0.89	1.03		0.82	0.03
								0.84	1.19		0.23	0.39
								1.71	0.18		1.84	0.55
								2.84	0.42		0.56	0.01
								2.4	0.18		0.86	0.14
								0.57	0.69		1.5	0.41
								2.92	0.06		0.66	0.54
								2.9	0.73		2.86	0.34
								3.84	0.42		1.94	1.88
								1.36	0		0.77	0.46
								2.88	0.41		0.41	0.46
								1.2	1.24		1.34	4.82
								0.51	0.38		0.33	0.66
								1.16	0.38		0.09	0.41
								1.94	0.8		3.03	1.57
								2.46	0.83		0.17	0.33
								1.02	0.3		0.46	0
								0.07	0.48		0.33	1.54
								1.22	1.52		0.58	0.46
								0.52	0.28		0.4	2.3
								2.48	1.26		0.06	0.66
								0.04	0.81		0.13	0.11
								2.64	0.37		1.03	0.05
								1.28	1		0.06	0.19
								2.07	0.2		0.47	0.45
								0.03	0.48		1.24	2.03
								0.68	0.09		0.34	0.07
								0.68	0.16		0.54	0.89
								0.91	1.57		0.33	0.42
								1.9	0.18		0.08	1.09
								0.59	0.39		3.28	0.07
								0.42	0.1		5.31	0.26
								2.51	0.33		0.35	2.9
								1.64	0.32		2.39	0.84
								0.08	0.27		0.43	1.16
								0.53	2.52		0.95	1.3
								0	1.88		0.01	1.72
								0	1.08		1.16	0.22
								2.07	0.51		0.44	0.02
								0.79	0.17		0.41	0.12
								0.99	0.61		1.24	0.16
								0.42	1.05		0.26	1.07
								3.78	0.45		0.83	1.92
								0.06	0.39		1.83	0.39
								0.12	0.64		0.05	0.94
								0.06	0.35		2.47	0.44
								0.51	0.04		1.73	0.24
								1.73	0.02		0.05	1.91
								0.19	1.92		0.45	0.47
								1.25	0.53		0.47	2.85
								1.9	0.2		0.35	1.5
								1.65	0.26		0.36	0.67
								1.42	0.43		0.52	1.01
								0.98	1.87		0.59	3.05
								0.1	0.67		0.04	2.25
								1.31	1.89		0.51	0.52
								0.29	1.43		0.81	0.91
								1.95	1		0.14	0.29
								0.04	0.34		2.4	1.14
								1.82	0.97		1.85	0.48
								0.04	1.43		0.64	0.06
								0	0.12		0.9	0.05
								0.34	0.57		0.14	0.17
								0.64	0.05		1.05	0.08
								0	0.1		1.55	0.08
								0.86	0		2.73	0.05
								0.34	0.4		0.47	1.09
								0.3	0.33		1.44	0.25
								1.69	0		0.82	0.05
								2.69	0.68		2.7	0.22
								1.2	0.31		2.33	1.19
								1.77	1.8		0.26	0.49
								2.04	0.87		0.04	0.27
								0.07	0.63		0.33	0.5
								0.03	0.17		2.09	0.47
								0.62	0.99		0.13	0.32
								0.16	1.51		0.05	0.51
								0.93	3.41		1.18	0.36
								0.06	1.01		1.74	0.63
								0.38	0.01		0.53	0.09
								0.03	0.88		0.29	2.08
								0.09	2.55		0.1	0.25
								0.59	1.72		0.18	2.95
								0.07	0.92		0.66	0.05
								1.12	0.33		0.05	2.31
								0.28	0.13		1.39	0.62
								0.87	0.46		0.46	0.71
								0	0.99		0.04	1.5
								0.26	0.18		0.1	0.82
								0.78	1.93		0.54	0.69
								1.1	0.27		0.42	0.18
								1.1	0.2		5.93	6.28
								1.19	0.89		0.55	1.27
								0.04	0.12		2.1	1.34
								0.55	0.37		0.33	1.11
								0.13	0.15		1.03	2.07
								0.09	0.87		1.29	3.92
								0.78	0.4		0.77	2.08
								0.11	0.98		0.3	0.08
								1.09	0.07		0.65	0.3
								0	1.04		1.32	0.97
								0.03	0.81		0.38	0.64
								0.03	0.12		0.21	1.23
								0.39	1.26		0.01	0.67
								0.04	0.08		0.11	0.2
								0.17	6.03		0.04	0.38
								1.17	0.94		0.45	0.35
								0.94	1.91		1.13	0.51
								0.35	1.24		1.23	1.18
								0.38	1.47		2.4	0.19
								0.66	0.68		0.44	0.32
								1.69	1.57		0.09	0.4
								0.07	0.35		0.04	1.07
								0.18	1.41		0.44	0.34
								0.47	0.61		0.09	1.15
								1.26	2.78		0.08	0.29
								0.33	1.18		0.84	0.95
								1.16	1.46		0.05	0.65
								0.18	1.14		0.51	0.73
								0.4	0.34		0.36	0.4
								0.86	2.3		1.11	0.61
								0.17	0.1		1.25	0.85
								2.14	1.34		0.63	0.98
								0.9	1.27		0.23	1.09
								0.08	1.14		0.36	2.93
								1.04	0.35		0.23	1.37
								0.75	0.33		0.23	1.73
								0.19	2.14		0.38	0.95
								1.56	0.57		0.26	0.62
								0.35	0.69		0.77	0.07
								0.33	1.24		0.3	0.24
								0.37	2.21		0.34	0.58
								0.36	1.36		0.01	0.38
								0.02	1.36		0.07	0.45
								0	0.66		0.18	1.18
								0.24	1.35		1.41	0.04
								0.01	0.12		0.19	0.39
								0.49	2.58		0.06	0.49
								0.6	0.46		0.03	0.22
								0.13	1.54		0.32	0.29
								0.66	1.64		3.05	0.85
								0.05	3.07		0.05	0.05
								0.05	0.45		0.34	0.47
								0.91	1.05		0.92	0.57
								0.51	0.68		0.15	1.13
								0.13	1.62		0.11	0.29
								0.13	0.47		0.56	1.84
								0.47	0.98		0.36	0.94
								1.94	0.65		0.46	0.4
								3.89	2.95		0.09	2.1
								2.53	2.73		1.57	1.05
								0	1.65		0.23	5.47
								0.87	1.92		0.5	0.09
								0.5	0.18		0.06	1.56
								0.37	0.62		1.71	1.51
								0.5	1.15		0.98	0.24
								0.82	0.25		0.37	1.45
								0.22	0.64		2.11	0.43
								0.04	1.88		0.26	2.04
								0.46	2.08		0.25	0.54
								0.12	1.29		0.08	0.36
								0.2	1.31		0.81	0.28
								0.08	0.91		0.1	1.41
								0.05	0.51		0.24	0.75
								2.31	0.44		0.6	0.91
								0.02	0.36		0.8	1.08
								0.58	0.2		0.18	0.28
								0.37	1.83		1.01	0.16
								1.65	1.07		0.09	0.72
								1.48	0.52		0.07	0.17
								2.11	0.12		0.35	0.11
								0.89	0.15		0.1	0.23
								0.74	0.66		0.31	0.33
								5.37	1.31		1.42	0.15
								0.89	1.42		0.08	1.27
								0.41	0.07		0.44	0.59
								0.15	0.48		0.68	0.05
								1.34	1.94		0.15	0.36
								0.92	0.69		0.1	1.17
								0.24	0.88		0.48	0.05
								0.12	0.9		0.8	0.47
								0.07	0.8		0.51	0.3
								0.72	0.94		1.02	0.2
								0.22	0.95		0.45	0.63
								0.13	2.79		1.07	0.31
								0.37	2.22		1.31	0.09
								2.77	2.24		1.73	0.01
								1.84	0.5		1.75	0.56
								0.27	2		0.85	1.61
								0.04	1.81		1.19	3.98
								0.27	3.51		0.32	0.64
								0.04	0.36		0.05	0.34
								0.01	1.63		1.64	1.83
								0	1.69		1.39	1.77
								0.3	0.83		0.18	0.31
								0.39	0.28		2.85	0
								0.49	0.3		0.32	0.23
								1.2	0.8		0.74	0.16
								0.67	0.51		1.46	0.01
								0.92	0.49		0.57	0.42
								1.56	4.56		0.2	0.1
								1.92	0.33		0.52	0.42
								2.63	1.67		0.12	0.37
								1.58	0.91		0.2	0.53
								0.43	0.16		0.32	0.31
								1.8	0.46		0.37	1.69
								0.65	2.01		1.28	0.68
								1.43	1.52		0.6	0.35
								0.5	1.06		0.24	0.12
								0.09	0.75		0.14	0.23
								1.27	0.4		0.39	0.13
								2.7	0.67		0.59	0.47
								1.31	2.37		1.22	1.09
								0.3	0.9		0.49	0.19
								0.46	0.29		0.52	0.51
								1.23	0.92		1.19	0.42
								0.33	0.4		0.01	0.43
								0.05	0.31		2.21	0.11
								0.76	0.56		0.04	0.34
								0.12	0.53		0.43	0.68
								0.92	1.29		1.27	0.65
								0.13	2.94		1.02	1.41
								0.51	0.38		0.11	0.04
								1.03	0.09		0.32	0.77
								0	0.94		0.51	0.5
								0.21	0.48		0.22	0.42
								0.29	0.03		0	0.52
								0.12	1.25		0.81	0.19
								0.5	1.18		0.99	0.44
								0.23	1.08		0.5	3.26
								1.42	0.8		0.44	0.63
								0.44	0.38		0.13	3.78
								0.04	0.1		0.15	0.93
								0.67	1.79		0.13	0.94
								0.08	0.09		0.24	0.7
								0.94	0.41		0.21	0.11
								1.93	1.55		0.59	6.22
								0.03	0.01		1.58	0.05
								0.58	0.12		0.29	0.1
								1.96	0.03		1.04	0.29
								0.44	0.58		0.54	0.51
								0.35	0.48		0.08	2.93
								2.12	0.37		0.53	0.68
								0.61	0.8		0.85	1.06
								1.29	0.39		0.36	0.18
								0.05	0.08		1.75	0.52
								0.32	0.08		0.48	0.7
								0.37	0.33		0.52	1.65
								0.1	2.86		0.85	0.49
								0.15	0.38		0.3	0.14
								0.57	0.02		0.3	1.24
								0.03	0.36		1.32	0.48
								1.54	0.15		0.06	2.42
								0.43	1.56		0.26	0.16
								0.5	0.45		1.3	0.1
								0.71	1		1.93	0.46
								0.93	0.24		0.9	0.05
								0.33	1.51		1.09	0.13
								2.27	1.16		6.2	0.82
								0.45	0.73		0.78	0.71
								0.49	0.17		0.03	0.16
								1.23	0.4		1.36	0.36
								1.38	0.56		1.11	1.1
								0.28	0.35		0.04	0.25
								0	0.46		0.9	0.42
								0.63	0.9		0.42	0.02
								1.64	0.01		0.82	0.35
								2.06	1.46		1.14	0.3
								0.69	0.65		0.25	1
								0.1	1.56		1.07	1.09
								1.72	0.48		0.08	0.05
								0.76	0.5		1.62	0.19
								1.34	0.43		2.98	1.07
								0.35	0.34		1.94	1.2
								0.79	0.23		0.01	0.3
								0.21	0.18		0.93	0.2
								1.26	0.79		1.4	1.91
								1.47	0.03		2.82	0.32
								1.26	0.24		0.37	0.91
								0.88	2.67		1.19	0.14
								1.34	1.04		0.67	0.09
								0.93	0.66		1.96	0.02
								1.23	0.74		0.95	0.27
								1.54	0.31		0.45	0.37
								1.05	1.1		1.25	1.37
								1.02	0.43		0.73	0
								0.67	0.87		0.09	0.28
								0.65	0.09		5.34	0.84
								0.97	0.63		4.07	1.27
								0.62	0.9		0	0.38
								0.58	1.76		0.76	0.7
								1.03	0.39		0.52	0.76
								1.54	0.74		0.3	0.56
								0.96	0.1		0.52	1.11
								0.52	1.42		1.25	1.47
								1.04	0.01		1.11	0.06
								0.93	0.02		2.52	0
								0.86	0.04		0.03	1.01
								0.5	0.37		0.95	0.46
								2.57	0.15		0.93	2.63
								0.77	1.97		0.15	0.39
								0.9	0.31		0.66	0.48
								0.58	1.23		0.49	0.21
								0.58	1.42		0.93	0.05
								0.95	0.12		0.58	0.37
								1.16	0.11		0.21	0.39
								1.03	0.46		0.71	1.17
								1	0.05		1.06	1.16
								1.05	0.54		0.1	0.57
								1.68	0.39		1.02	0.22
								1.19	0.35		0.13	0.72
								0.51	0.07		0.26	0.73
								0.44	0.15		0.05	0.43
								1.7	0.83		0.37	0.39
								1.19	0.49		0.83	0.44
								0.82	0.54		0.54	0.28
								0.63	1.96		1.15	0.26
								0.99	0.41		0.24	0.16
								1.8	0.05		0.7	0.06
								1.14	0.01		1.87	0.1
								0.71	0.18		0.98	0.3
								0.35	0.45		1.77	0.05
								2.68	0.91		0.61	0.2
								3.06	0.17		0.05	0.33
								3.7	2.17		0.72	3.61
								1.51	0.51		0.42	0.15
								1.25	1.89		3.93	1.14
								0.79	0.5		2.44	0.77
								1.16	1.95		3.72	0.69
								1.39	0.28		0	1.63
								3.33	0.21		0	0.17
								0.86	0.13		1.18	0.33
								1.07	0.51		0.22	0.7
								1.17	1.5		0.52	0.54
								1.26	2.01		0.73	0.18
								0.81	0.08		0.26	0.24
								2.6	0.04		1.69	0.99
								0.52	0.43		2.43	1.69
								1.09	2.26		0.99	0.04
								2.52	0.32		0.6	0.05
								0.99	0.08		0.29	0.29
								1.33	0.07		0.95	2.18
								1.06	1.2		0.85	0.02
								1.92	1.31		0.63	0.63
								2.49	0.32		1.19	0.23
								5.73	0.01		0.63	1.68
								2.22	0.11		8.55	0.24
								0.37	1.93		1.13	0.13
								2.15	1.22		2.75	0.28
								1.01	0.17		1.41	1.09
								5.27	0.08		0.05	0.61
								0.47	0.11		1.23	0.04
								2.79	1.32		1.22	0.95
								1.1	0.6		1.2	0.54
								2.17	0.32		0.21	0.12
								1.09	1.11		1.64	0.99
								1.15	0.46		0.7	2.8
								1.18	0.31		0.05	0.69
								0.44	0.15		0.24	2.39
								0.52	1.03		0	0.05
								0.68	0.15		1.01	0.41
								0.65	0.54		0.08	0.29
								6.86	1.04		0.61	0.44
								0.89	0.58		0.37	0.34
								0.24	0.86		0.43	0.65
								0.11	0.4		0.12	0.58
								1.54	1.73		1.14	0.07
								0.38	1.25		0.47	0.51
								1.51	0.02		0.24	0.22
								3.42	1.47		0.06	0.1
								0.61	0.62		1.39	0.22
								1.31	0.21		1.54	0.32
								4.79	1.46		1.38	0.05
								0.04	1.23		1.35	0.08
								0.3	1.71		0.66	0.49
								1.24	0.33		0.25	0.06
								1.08	0.01		0.4	0.43
								0.25	0		2.11	1.01
								0.24	0.02		1.15	0.86
								0.12	0.63		1.29	0.78
								0.12	0.41		0.22	0.45
								0.1	0.62		1.05	1.03
								0.3	0.55		0.27	1.69
								0.54	0.58		0.29	0.47
								4.69	1.08		1.03	0.27
								0.06	0.65		0.25	0.53
								0.62	0.75		3.18	0.93
								1.25	0.45		0	0.29
								0.07	0.37		0.38	0.5
								0.01	0.2		0.85	0.06
								3.36	0.45		0.22	0
								0.89	0.48		0.1	1.13
								0.3	0.94		0.89	0.18
								0.12	0.01		0.65	0.06
								0.37	2.8		0.33	0.04
								1.45	0.23		1.45	0.26
								0.47	0.03		2.03	0.12
								3.77	0		0.34	0.45
								0.02	0.74		0	0.31
								0.12	1.27		0.14	0.03
								1.17	0.13		0.71	0.48
								4.11	0.18		0.33	0.61
								2.65	0.53		0.46	0.37
								0.66	0.17		0.56	0.75
								0.85	0.58		1.39	0.63
								0.99	0.04		0.05	1.45
								0.94	0.36		0.4	1.06
								1.51	2.3		1.91	0.15
								0.24	0.58		0.28	1.02
								0.11	0.49		0.39	0.61
								0.38	0.43		1.17	0.24
								2.3	2.9		0.43	0.1
								0.97	0.38		0.03	0.33
								0.13	1.13		0.98	0.05
								0.56	1.16		0.29	0.88
								0.53	0.32		1.74	0.13
								1.23	1.07		0.6	0.02
								0.55	0.32		0.3	0.13
								0.27	0.84		0.18	0.44
								1.21	0.06		0.39	0.3
								0.37	1.1		1.52	0.1
								0.23	1.77		1.88	0.34
								0.26	0.11		1.21	0.1
								0.26	0.1		0.76	1.84
								1.37	0.59		1.12	0.32
								1.43	1.13		0.99	1.93
								1.94	0.69		1.16	0.2
								0	0.95		0.72	0.35
								0.58	1.62		2.72	0.98
								0.04	0.37		1.62	0.37
								0.08	0.76		1.25	0
								1.6	0.41		1.15	0.99
								0.28	0.5		0.81	0.39
								0.37	1.24		0.39	0.25
								1.15	1.33		2.95	0.23
								0.24	0.12		0.16	0.14
								0.76	0.83		0.97	0.72
								1.02	1.27		1.25	0.31
								0.19	0.46		1.06	0.02
								0.81	0.48		0.19	1.47
								1.8	0.21		0.81	2.34
								0.28	0.27		1.28	2.83
								0.66	0.66		0.99	1.81
								1.57	0.44		0.79	0.3
								3.3	1.72		0.27	0.13
								0.51	0.06		1.01	0.42
								0.64	2.17		2.65	0.42
								0.72	1.45		0.92	0.04
								0.61	1.02		1.36	0.52
								0.97	1.62		0.33	0.8
								0.67	0.48		0.64	0.05
								1.25	0.13		0.44	0.62
								0.7	0.11		1.32	1.55
								0.41	1		2.09	0.64
								0.88	0.57		0.43	0.31
								0.77	0.59		1.38	0.21
								0.29	0.53		1.27	0.41
								0.32	0.04		0.76	0.75
								0.55	0.1		1.23	0.05
								0.09	1.13		0.16	1
								0.92	0.93		0.82	0.33
								0	0.57		0.11	1.51
								1.19	0.81		0.59	1.44
								0.46	0.5		0.14	0.08
								1.15	1.22		0.02	1.1
								0.17	1.42		0.06	0.01
								0.84	1.9		0.51	0.13
								1.34	0.22		0.14	2.16
								0.07	1.61		0.13	0.23
								0.04	1.19		1.34	0.38
								0.04	0.37		0.09	1
								0.28	0.31		0.11	0.29
								1.32	0.7		1.46	0.24
								0.48	0.4		0.33	0.55
								0.97	0.3		0.06	0.53
								1.22	1.21		0	0.62
								0.29	0.41		0.21	1.73
								0.75	0.45		0.07	2.1
								0.68	0.15		0.36	2.12
								0.13	0.05		0.58	0.29
								0.9	1.27		0.66	0.17
								0.63	0.2		0.95	0.71
								0.74	0.12		1.38	0.46
								0.92	0.19		0.35	1.5
								0.87	0.91		0.27	0.31
								1.03	1.35		0.01	1.14
								2.44	1.26		1.29	1.15
								1.37	0.84		0.03	0.27
								0.64	0.28		0.38	1.23
								0.99	1		0.31	0.39
								1.24	0.09		1.66	0.39
								0.45	0.35		0.78	1.07
								1.16	0.94		2.6	0.48
								0.97	0.61		0.25	0.12
								1.24	0.68		0.28	1.91
								1.43	0.07		0.23	2.23
								0.53	0.58		0.41	0.43
								0.75	0.89		1.99	0.63
								0	1.44		0.89	0.28
								0	1.37		0.06	1.34
								0.98	0.13		0.62	0.03
								1.27	0.23		0.38	0.31
								1.6	0.29		1.04	1.56
								0.88	0		0.27	0.23
								0.22	0.02		0.04	0.03
								0.08	0.46		5.25	0.05
								0.2	1.33		1.32	0.5
								0.22	0.35		0.54	0.49
								1.24	0.95		0.34	0.73
								0.45	0.43		0.04	0.47
								0.21	0.21		2.42	0.33
								1.16	0.5		0.36	0.83
								0.74	1.16		0.47	1.34
								0.41	1.07		0.31	0.58
								0.42	3.25		0.88	2.3
								0.46	1.2		2.23	3.35
								0.87	1.07		0.28	0.37
								0.13	0.07		1.99	1.82
								0	1.12		0.21	0.86
								3.37	0.91		0.2	1.35
								0.87	0.6		0.74	0.35
								0	1.13		0.37	1.59
								0.26	0.07		1.2	0.8
								0.31	0.17		0.52	0.11
								0.34	0.04		0.08	0.33
								0.22	0.11		0.24	0.89
								0.28	0.74		1.03	0.08
								0.81	2.24		1.23	0.04
								0.23	0.36		0.46	0.02
								0.42	0.83		0	0.6
								0.42	1.47		0.05	3.28
								0.54	0.74		1.86	0.51
								0.16	0.17		2.31	0.92
								0.47	0.61		0.63	0.54
								0.13	2.04		1.94	2.76
								0.82	1.12		0.91	1.85
								5.62	0		1.21	1.53
								5.05	1.59		0.45	0.97
								1.18	0.12		0.08	1.09
								5.52	2.53		1.27	0.43
								0.25	0.81		0.1	2.3
								0.6	1.64		0.25	1.59
								1.16	0.73		1.29	0.7
								0.64	1.4		0.68	2.36
								0.68	3.09		0.71	0.78
								0.55	0.3		0	2.6
								0.87	0.13		0.52	0.58
								5.16	0.05		0.15	4.8
								3.23	2.68		1.22	1.17
								0.53	2.02		2.97	2.23
								0.48	0.18		0.47	1.01
								0.13	0.28		0.34	0.53
								0.61	1.41		0.73	0.01
								0.52	0.28		4.48	0.05
								1.67	0.5		0.15	0
								1.08	0.64		0.5	0.21
								5.76	0.32		1.58	0.67
								0.95	0.08		0.05	0.35
								1.02	2.34		1.09	1.08
								0.32	0.37		1.07	0.67
								1.9	0.28		0.16	0.29
								0.73	0.35		1.77	0.43
								0.48	1.27		0.66	0.03
								1.96	2.21		0.52	0.93
								1.27	0.14		0.01	1.13
								0.03	0.01		1.68	1.11
								0.05	0.05		0.32	0.36
								4.61	0.66		0.81	0.24
								0.48	1.6		1.41	0.94
								0.38	0.37		0.09	0.35
								1.56	2.74		2.07	0.86
								1.17	1.71		0.41	0.53
								0.73	0.17		1.65	0.84
								0.67	1.34		0.94	0.81
								0.27	4.14		0.06	0.62
								3.37	2.06		1.04	0.47
								2.83	0.04		0.52	1.14
								1.16	0.01		0.74	0.8
								1.99	0.52		2.88	0.26
								1.32	0.87		1.25	0.13
								0.13	0.26		2.99	1.38
								1.59	1.57		0.17	0.63
								1.91	2.11		1.72	0.25
								0.29	2.66		0.04	0.4
								0.91	1.54		0.45	0.5
								1.3	0.07		0.18	1.5
								1.38	0.02		1.4	0.67
								0.47	0.73		0.68	0.49
								2.26	0.41		1.93	0.72
								0.51	0.93		0.46	0.81
								1.78	0.59		1.39	0.37
								0.3	2.39		0.53	2.27
								1.02	0.04		0.39	0.06
								0.15	0.21		0.03	1.37
								0.61	0.03		3.9	1.17
								0.32	0.23		2.5	2.49
								2.87	2.52		1.13	0.22
								0.05	0.21		1.2	1.06
								0.05	3.4		0.36	0.73
								1.46	3.08		1.58	0.18
								2.39	0.29		0.7	0.96
								0.56	0.04		1.87	0.46
								0.26	0.08		0.77	0.22
								1.24	1.51		1.39	0.35
								0.61	0.04		2.1	2.22
								0.34	0.37		0.68	1.06
								0.34	0.51		1.78	1.07
								0.77	0		0.41	0.27
								0.04	0.05		0.78	1.78
								0.47	1.35		2.62	0.83
								0.55	0.02		1.71	1.15
								0	0.36		0	1.57
								0.42	0.58		1.14	0.52
								0.04	0.21		0.23	1.21
								0.91	0.24		0.96	0.3
								2.62	0.18		1.53	0.02
								1.26	1.46		1.08	0.18
								3.27	0.36		1.44	5.05
								2.88	0.7		1.83	0.59
								2.73	0.92		0.02	1.01
								0.63	0.32		4.19	0.3
								1.86	0.52		4.11	0.99
								0.05	0.3		1.54	1.38
								0.49	0.88		2.77	1.5
								0.32	0.52		1.28	1.53
								0.46	0.11		0.1	0.23
								0.98	0.01		1.32	0.09
								1.67	1.15		0.52	8.18
								0.75	0.04		0	0.3
								0.29	0.58		0.82	0.11
								0.63	1.02		2.27	0.23
								1.31	0.07		3.59	0.56
								1.65	0.45		2.34	0.15
								0.54	0.5		2.02	0.04
								0.34	0.72		2.02	1.16
								0.43	1.81		0.05	0.34
								0.59	1.65		0.23	6.03
								1.24	0.68		1.72	1.08
								0.53	0.39		6.81	0.13
								0.97	0.33		1.38	0
								0.54	0.37		0.21	2.33
								0.78	1.28		0.57	0.86
								1.83	0.09		3.08	0.81
								1.01	0.26		5.75	1.27
								0.24	1.5		3.52	1
								0.92	0.45		0.25	0.93
								1.43	0.29		1.41	0.89
								0.47	0.48		1.04	0.21
								0.6	0.89		2.06	0.37
								1.04	0.05		0.78	0.05
								0.36	0.04		0.02	0.58
								1.27	0.37		0.77	0.71
								2.5	0.31		0.04	0.1
								1.11	0.04		0.54	1.94
								2.95	0.17		0.66	0.31
								2.81	0.32		5.16	0.06
								1.21	0.08		1.33	1.57
								0.65	0.03		0.74	0.37
								2.17	0.11		2.64	1.8
								1.01	1.04		0.95	1.49
								0.37	1.12		0.42	3.59
								0.6	0.3		0.21	1.36
								1.12	0.52		0.63	0.2
								0.21	0.44		1.81	0.54
								0.95	2.43		0.33	0.56
								1.18	0.1		0.29	0.2
								1.28	3.66		0.01	0.77
								0.04	0.21		0.06	0.26
								1.82	0.3		1.02	1.87
								0.05	0.77		0.81	0.52
								0.9	0.33		0.13	0.1
								1.56	0.13		0.58	0.62
								1.45	1.76		0	0.5
								0.37	0.01		0.09	0.62
								1.58	0.12		0.44	0.37
								1.36	0.44		0.03	0.15
								1.01	0		0.28	0.19
								0.44	0.01		0.36	0.05
								0.44	0.75		0.67	0.02
								4.66	0.98		0.37	0.74
								1.2	0.58		1.28	0.62
								0.44	0.22		3.24	0.61
								0.04	0		0.01	7.62
								0.4	0.13		0.32	3.43
								0.27	0.02		0	3
								0.39	0.91		0.31	0.91
								2.32	2.16		0.32	0.11
								0	0.23		0.01	0.11
								0.27	1.26		1.05	1
								1.53	0.17		0.18	3.46
								0.35	0.14		0.48	0.45
								0.94	0.32		1.68	0.34
								1.13	0.49		1.2	1.22
								0.38	0.84		0.57	0.68
								0.2	0.47		1.54	2.66
								1.41	0.23		1.61	0.03
								0.72	2.27		0.69	0.08
								0.73	0.66		0.94	8.4
								0.18	2.19		0.73	0.63
								1.45	2.53		0.53	0.62
								0.99	0.08		1.47	0
								0.09	0.13		2.04	0.32
								3.2	0.04		1.8	0.26
								1.32	0.27		1.24	0.88
								0.63	0.96		0.05	1.01
								1.51	2.46		0.51	0.94
								0.76	0.54		0.12	0.93
								0.5	0.05		0.73	0.85
								0.31	0.98		0.52	0.64
								0.04	1.49		0.12	0.2
								0.28	0.4		0.31	0.77
								0.01	1.26		2.56	0.4
								0.89	0.46		0.42	0.14
								0.5	0.8		1.03	0.86
								1.57	0.53		0.7	0.13
								0.35	0.47		0.46	0.1
								0.02	0.05		0.04	1.27
								0.08	0.08		0.19	1.36
								0.23	0.89		0.12	1.41
								0.07	1.55		0.02	0.31
								0	1.95		0.22	3.17
								2.43	0.85		1.05	0.42
								0.79	2.45		0.32	0.96
								0.02	1.9		0.11	0
								0.61	0.25		0	0.37
								0.37	1.63		1.16	1.33
								1.17	0.55		0.24	1.18
								0.37	0.22		1.08	0.37
								0.28	0.74		0.04	1.59
								1.79	0.29		0.17	1.41
								0.08	0.4		0.66	0.1
								1.1	0.33		1.9	0.87
								0.11	1.64		0.68	0.21
								0.08	0.05		0.26	1.59
								0.33	1.46		1.62	0.11
								1.56	0.29		1.15	0.56
								0.34	0.3		0.33	2.58
								0.25	0.12		1.12	2.42
								0.39	0.78		0	0.06
								0.51	0.56		0.59	1.46
								0.58	0.29		0.62	0.3
								1.99	0.24		0.4	0.49
								0.98	0.08		0.06	0.04
								0.42	0.34		0.22	0.3
								0.37	0.27		0.05	0.05
								1.34	0.31		0.79	0.12
								1.63	0.19		0.39	3.36
								0.07	0.33		0.07	1.96
								0.07	0.24		0.85	0.52
								1.4	0.7		1.12	0.71
								0.22	1.92		1.42	1.3
								0.04	1.61		0.6	0.67
								0.94	0.82		0.73	2.25
								0.38	0.35		1.25	0.98
								1.01	0.04		0.01	0.29
								0.74	1.26		0.66	1.77
								0.08	1.32		0.31	0.31
								0.41	0.14		0.18	0.05
								0.49	1		0.3	0.27
								1.47	0.4		0.35	1.71
								1.26	0.13		1.11	0.71
								1.41	0.99		0.38	0.69
								0.92	0.08		0.13	0.1
								0.22	0.12		0.42	0.06
								1.52	0.19		0.99	0.37
								0.37	1.57		0.46	0.12
								0.41	0.1		1.86	0.35
								1.21	0.09		0.86	0.04
								1.28	0.83		0.19	0.06
								0.36	0.12		2.21	1.21
								0.03	0.29		0.43	0.48
								0.07	0.35		0.3	2.74
								1.19	0.49		0.37	0.14
								0.22	0.36		0.42	0.46
								0.93	0.43		0.72	1.4
								0.12	1.06		1.09	0.04
								0.26	0.73		0.24	1.14
								0.22	0.12		1.35	0.05
								0.77	0.5		0.3	1.01
								0.57	0.1		0.45	0.7
								0.14	0.16		0.3	0.64
								0.42	0.39		0.31	0.43
								0.77	0.41		1.38	1.35
								1.16	0.99		0.79	1.46
								0.64	0.04		0.62	0.19
								0.9	0.14		0.28	1.16
								0.11	0.07		0.86	2.21
								0.36	0.04		1.61	1.86
								0.95	0.48		0.32	0.09
								2.11	2.84		0.37	1.71
								1.03	0.36		0.55	0.53
								0.24	1.06		0.62	1.25
								0.76	1.13		0.4	0.05
								0.83	0.18		1.48	0
								0.32	0.51		0.64	2.68
								0.03	0.03		0.31	1.04
								0.11	0.01		1.39	0.45
								0.34	1.8		0.34	0
								0.47	0.35		1.06	0.38
								0.67	0.27		0.33	0.24
								0.05	1.13		1.19	0.47
								0.57	1.59		0.64	0.12
								0.42	0.3		0.93	0.11
								0.96	1.22		0.77	1.9
								0.08	0.62		0.64	0.04
								0.45	1.3		1.03	0.04
								3.23	1.35		0.17	0.63
								0.01	2.41		0.83	2
								0.72	0.41		0.95	1.2
								0.65	1.1		0.11	1.08
								0.95	0.42		0.04	0.46
								0.69	0.38		0.1	0.31
								0.29	0.32		0.54	1.21
								1.34	0.16		0.85	0.63
								1.99	0.36		1.67	0.04
								2.1	0.04		1.08	0.65
								0.86	0.05		0.4	0.12
								0.31	0.82		1.11	1.13
								0	0.73		1.39	2.86
								0.5	0.02		0.2	1.2
								0.53	1.53		0.48	1.87
								0	0.14		1.01	0.62
								0.64	0.23		0.41	0.38
								0.4	1.45		0.47	0.88
								0.28	0.05		0.03	1.25
								0.03	0.01		1.4	0.33
								1.08	1.71		0.01	0.35
								0.89	1.36		0.92	0.06
								0.47	0.05		0.38	0.41
								0.03	0.15		1.14	1.08
								0.09	1.46		0.35	0.45
								0.02	0.73		1.31	1
								0.04	0.05		1.54	0.52
								4.21	0.08		0.42	0.06
								0.28	0.03		0.11	0.34
								1.99	1.04		1.69	0.04
								0.4	0.83		1.01	1.56
								0.05	0.41		1.06	0.91
								0.84	1.05		0.59	2.63
								0.24	0.95		0.04	1.27
								0.24	0.36		0.86	0.16
								0.46	0.43		0.18	0.05
								2.34	0.45		0.81	0.37
								0.88	0.13		0.58	0.82
								0.69	0.2		0.05	0.24
								1.99	0.83		0.39	0.62
								0.2	0.27		1.98	1.94
								0.09	0.35		1.14	0.68
								0.88	1.42		0.7	0.78
								0.1	1.6		0.25	0.55
								0.63	0.4		1.2	0.64
								0.65	0.02		1.58	1.47
								0.49	0.63		1.07	2.6
								0.19	0.2		0.39	0.05
								1.04	0.09		0.42	0.04
								1.37	0.04		1.81	0.85
								0.99	1.49		0.54	1.94
								0	2.28		2.02	0.5
								0.22	0.04		0.22	1.67
								0.37	0.35		3.37	0.04
								1.75	0.84		0.3	0
								0.05	0.7		0.83	0.93
								0.33	0.14		0.23	0.6
								0.5	2.13		0.69	0.24
								0.05	0.85		0.31	1.49
								0.71	0.9		0.54	2.39
								1.96	0.14		2.37	2.69
								1.92	0.78		0.16	0.03
								0.29	0.39		0.13	1.46
								2.56	0.1		0.1	0.46
								0.4	0.04		0.09	0.33
								1.11	0		0.37	0
								0.04	0.87		0.68	0.13
								0.32	0.43		0.29	0.52
								0.76	1.1		0.42	1.27
								0.39	0.45		0.76	1.3
								0.39	0.11		1.13	0.98
								0.42	1.06		1.89	0.52
								0.11	0.36		0.17	0.16
								0.08	1.24		0.73	0.26
								0.84	0.78		0.74	0.96
								0.01	3.75		1.36	0.74
								1.01	2.67		2.05	1.07
								0.43	0.53		0.48	0.57
								1.53	0.81		0.43	0.05
								1.42	0.11		0.23	0.37
								0.08	0.92		2.86	0.51
								1.46	0.19		0.03	0.04
								0.03	1.27		1.13	0.22
								0.72	0.31		0.65	0.03
								1.6	0.63		0.28	1.95
								1.9	0.61		0.92	0
								1.7	2.52		2.13	0.65
								1.43	0.29		0.28	1.1
								0.16	0.95		0.08	0.72
								2.01	0.21		0.96	1.31
								5.68	0.71		0.45	2.4
								0.73	0.23		0	1.32
								0.69	0.7		0.78	0.42
								1.83	1.02		0.34	0.6
								1.01	1.06		0.08	0.45
								0.38	0.02		1.34	0.05
								1.72	0.02		0.48	0.04
								0.93	0.35		0.11	0.05
								0.04	0.77		0.33	0.13
								0.57	0.89		2.66	1.74
								3.07	0.53		1.09	0.81
								0.78	0.11		1.24	0.02
								0.7	1.46		1.02	0.37
								0.62	2		0.08	0.22
								0.57	0.1		0.36	0.42
								1.55	2.02		0.78	0.71
								1.79	0.45		2.22	1.1
								1.67	0.52		1.99	0.49
								0.49	0.04		0.1	1.38
								1.19	0.06		0.2	0.28
								0.09	0.05		1.28	0.96
								1.46	0.03		0	1.31
								0.11	0.56		0.36	0.63
								1.53	0.37		0.78	0.45
								1.75	2		0.84	0.04
								1.5	1.15		0.5	0.09
								0.39	0.75		0.84	0.36
								0.56	0.36		0.56	0.05
								1.29	0.4		0.18	0.59
								1.23	0.78		0.73	0.24
								0.56	0.13		0.24	0.69
								0.67	0.34		0.83	0.22
								0.25	2.23		0.09	0.62
								1.04	3.14		1.92	0.45
								0.05	0.41		0.23	0.13
								2.98	0.74		0.68	0.49
								2.97	0.04		0.3	1.36
								1.44	5.21		0.55	0.04
								1.46	0.13		0.12	1.36
								1.15	0.84		0.87	0.37
								1.21	0.62		1.58	1.38
								0.13	0.54		0.97	0.34
								0.87	1.39		0.72	0.35
								1.68	0.01		0.95	0.25
								2.57	0.03		0.38	0.77
								1.03	1.36		0.14	0.03
								0.43	0.05		0.18	1.91
								1.52	0.04		0.25	0.1
								1.08	0.04		0.28	2.11
								1.15	0.01		0.32	0.05
								1.65	0.35		0.04	0.63
								0.56	0.34		0.04	0.55
								0.84	0.43		0.22	0.57
								0.56	0.72		0.13	1.23
								1.95	0.92		0.68	1.54
								2.3	0.52		0.1	0.28
								0	0.51		0.79	1.38
								1.36	0.48		0.36	0.1
								0.15	0.69		3.41	2.32
								2.89	0.52		1.34	1.14
								0.4	1.11		0.81	0.59
								0.2	0.04		0.01	0.67
								0.8	1.1		0.62	0.35
								0.52	0.23		0.32	0.19
								0.95	0.35		1.44	0.04
								2.58	0.6		1.85	0.41
								1.78	0.28		0.5	0.42
								2.6	0.76		0.71	0.29
								0.46	0.1		1.4	1.34
								0.12	0.28		0.51	0.04
								1.65	2.15		1.33	0.82
								1.1	0.9		7.44	0.1
								0.08	0.19		0.57	0.37
								0.47	0.46		0.84	0.04
								1.07	0.62		1.68	0.53
								1.54	0.34		6.07	0.31
								0.04	0.85		0.11	0.5
								0.25	0.6		0.23	0.19
								1.84	1.16		2.88	2.04
								1.08	0.38		2.01	1.45
								0.37	0.06		0.46	1.91
								1.52	0.86		0.06	0.65
								1.82	0.24		0.77	1
								1.61	0.36		0.58	1.82
								0.71	0.01		0.5	0.78
								0.47	0.02		0.61	0.67
								0.81	0.05		0.05	0.43
								1.26	0.03		0.92	0
								0.36	1.47		1.6	0.24
								1.67	0.28		0.6	0.12
								1.6	1.22		1.35	2.59
								1.43	0.17		0.73	0.42
								0.49	0.85		0.22	0.59
								0.9	4.42		0.94	0.27
								0.58	0.72		1.34	0
								0	0.5		0.31	1.07
								0.37	0.75		2.48	0.26
								0.6	0.54		1.06	0.55
								0.47	0.08		0.25	0.34
								2.18	0.25		0.64	0.06
								1.19	1.05		0.43	0.54
								0.05	1.59		0.12	0.52
								0	1.08		0.4	3.06
								1.1	0.64		0.48	0.43
								0.06	1.01		0.03	0.42
								0.06	2.8		0.66	2.83
								2.03	0.4		0.5	1.17
								0.22	0.69		0.04	0.29
								0.07	0.32		0.58	0.43
								0.45	2.63		0	0.4
								1.65	0.64		0.34	0.49
								0.89	0.09		0.62	0.15
								1.03	0.24		0.3	0.57
								0.17	0.12		2.88	0.4
								1.13	0.35		0.05	0.29
								0.57	0.52		0.27	1.25
								0.28	0.48		0.74	0.35
								0.19	0.05		1.45	0.21
								0.19	2.31		2.09	0.05
								0.1	0.52		0.67	0.33
								0.46	0.11		1.93	0.87
								0.09	0.02		0.52	0.79
								0.33	0.04		1.72	0.91
								0	1.03		0.65	1.1
								0.16	1.42		2.32	1.82
								0.37	0.36		0.67	1.03
								0.5	0.36		1.87	2.44
								0.16	0.04		0.17	2.65
								0	0.26		0.16	0.86
								1.87	0.61		0.2	0.36
								0.37	0.11		0.02	0.05
								0.82	0.11		2.06	1.33
								0.3	0.11		0.88	0.37
								1.53	0.01		2.27	2.11
								0.35	0.03		0.36	0.4
								0.47	0.28		0.58	0.05
								0.02	1.29		0.36	0.35
								2.05	1.22		2.94	0.01
								0.05	0.25		0.05	0.38
								0.48	0.32		0.26	1.14
								1.34	0.7		0.93	0.05
								0.08	0.02		0.11	0.43
								0.12	1.06		0.34	0.15
								3.04	4.89		1.51	0.03
								0.56	0.52		0.32	1.03
								2.47	0.01		0.81	0.39
								1.02	3.66		0.52	0.01
								1.14	2.38		0.32	0.4
								1.28	0.34		0.46	0.68
								0.37	0.7		3.15	1.07
								0.32	1		0.63	1.06
								2.35	0		2.4	0.98
								2.94	1.87		0.7	1.85
								0.14	0.51		1.6	0.22
								1.23	0.05		0.65	1.85
								0.42	0.59		0.56	1.01
								0.72	0.32		0.06	0.5
								2.26	2.16		0.07	1.03
								3.86	0.17		0.7	0.27
								1.1	0.08		0.15	0.51
								1.38	0.71		1.33	1.91
								3.09	1.88		0.31	0.34
								0.73	1.17		3.03	0.76
								3.37	0.3		0.46	0.46
								0.81	0.82		1.12	0.42
								0.05	0.08		0.52	0.8
								0.5	0.27		0.29	1.48
								0.67	0.16		1.05	1.24
								0.47	0.63		1.41	0.38
								0.03	0.77		0.9	0.43
								0.85	0.43		0.35	1.11
								1.19	0.21		0.76	0.34
								1.92	0.54		1.65	0.52
								2.03	0.74		0.59	0.81
								1.19	0.3		1.55	1.04
								1.53	1.69		1.16	0.51
								1.31	1.86		1.13	0.57
								1.54	0.57		0.51	0.82
								0.15	0.28		0.84	0.71
								0.08	0.11		1.87	0.85
								0.5	1.02		3.03	0.79
								0.28	0.31		0.86	1
								2.47	2.11		0.89	0.89
								1.98	0.11		0.09	0.71
								0.05	1.76		0.86	1.15
								0.32	0.04		0.16	0.7
								0.05	0.14		1.64	0.32
								0.27	0.97		0.54	1.3
								0.57	1.31		0.11	1.25
								0.1	1.47		0.01	0.3
								0.01	1.07		0.22	0.27
								1.28	2.3		0.85	0.35
								1.06	0.61		1.22	0.34
								1.16	0.46		0.42	0.35
								1.32	0.03		1.8	0.29
								0.71	0.42		0.24	0.3
								1	0.97		0.05	0.93
								0.27	0.67		0.07	2.85
								0	0.33		1.05	0.08
								0.29	0.62		0.05	1.3
								1.65	1.63		0.1	0.28
								1.35	0.68		0.91	1.17
								0.33	0.14		1.59	0.78
								0.12	0.23		0.92	0.14
								1.4	0.34		0.34	0.35
								1.04	1.43		0.09	0.12
								0.37	1.73		0.01	0.28
								0.38	0.13		0.11	1.33
								2.21	0.3		1.27	0.33
								1.68	0.48		1.11	0.98
								2.81	1.42		0.45	0.16
								0.5	0.26		3.55	0.15
								1.37	0.25		0.02	1.77
								0.11	0.24		0.02	0.91
								1.54	0.65		0.47	1.77
								1.76	1.33		0.31	0.44
								0.16	1.14		0.01	0.44
								0.81	0.42		0.57	0.23
								0.03	0.17		2.21	0.63
								3.65	0.89		1.04	0.49
								0.27	0.54		0.83	0.93
								2.7	1.1		0.38	0.32
								0.1	1.6		1.21	0.47
								0.25	0.29		2.73	1.61
								0.92	1.25		1.72	1.39
								1.71	1.15		0.94	2.07
								1.21	1.4		1.77	0.37
								0.37	0.97		0.92	0.62
								0.67	0.71		2.26	0.39
								2.22	0.52		1.58	0.87
								0.29	0.2		5.84	0.86
								0.18	0.47		1.09	0.83
								0.82	0.99		0.23	0.36
								2.47	1.42		1.09	1.09
								0.63	0.46		0.13	0.04
								0.74	0.72		0.4	0.47
								0.37	1.61		8.79	0.23
								0.2	0.77		0.84	0.04
								0.94	0.11		1.34	0.1
								2.86	1.36		2.97	0.8
								0.04	0.36		0.1	1.23
								0.83	0.35		1.45	0.05
								0.17	1.03		6.06	0.61
								0.54	0.6		0.26	0.1
								1.13	0.01		0.42	0.61
								0.06	0.34		0.42	0.35
								0.2	0.18		0.85	1.4
								1.46	3.88		1.22	1.4
								0.51	0.34		0.72	0.31
								0.12	0.26		1.23	1.46
								1.23	1.23		1.12	1.06
								0.12	0.74		1.04	0.28
								0.48	1.71		0.68	0.12
								0.16	0.14		0.98	0.01
								0.55	1.97		0.46	0.16
								0.11	1.17		2.62	0.29
								1.67	0.33		2.54	0.11
								1.88	0.38		0.13	0.39
								2.45	0.27		0.44	1.78
								1.63	0.11		0.28	1.13
								1.67	0.46		2.54	0.22
								1.67	0.33		0.49	1.11
								0.38	1.78		2.71	3.55
								3.47	0.05		1.56	0.38
								0.16	0.29		1.53	0.01
								0.89	0.32		1.28	0.97
								1.49	0.18		0.38	0.35
								0.62	2.23		0.83	0.82
								0.21	0.05		0.14	0.77
								0.36	0.32		0.11	0.71
								0.93	1.04		0.35	0.1
								0.2	0.41		1.15	0.31
								0.73	1.28		0.13	0.65
								0.13	0.14		0.7	0.41
								0.89	0.41		0.59	0
								0.83	0.12		0.88	0.1
								3.05	1.12		0.33	0.33
								1.04	0.26		0.24	0.89
								5.28	0.07		0.51	0.83
								0.19	0.13		0.8	0.47
								0.04	0.46		0.37	0.12
								1.01	0.46		0.68	0.04
								0.45	0.84		0.74	0.32
								0.75	0.53		0.36	0.08
								0.19	0.72		0.66	1.14
								0.02	2.19		1.45	0.03
								0.08	0		0.21	1.2
								0.1	0.87		1.1	0.3
								0.11	0.32		1.55	0.04
								0.01	0.1		0	1.18
								0	0.01		0.65	0.72
								1.73	0.13		0.45	0.2
								0.19	0.1		0.86	1.36
								0.16	0.77		0.95	0.64
								0.94	0.03		0.22	0.43
								0.04	0.59		0.05	0.05
								0.94	0.51		1.07	0.31
								0.45	1.6		1.24	0.13
								0.65	0.74		0.05	1.92
								0.11	0.77		0.45	0.37
								0.56	0.49		0.39	0.03
								1.71	0.45		0.68	0.42
								0.11	0.29		0.83	0.53
								0.08	0.35		0.39	1.21
								0.27	1.25		0.31	0.04
								0.18	0.42		1.17	1.25
								0.32	1.48		1.17	0.93
								0.11	0.15		1.31	2.48
								0.13	0.26		1.59	0.41
								0.35	0.23		1.13	0.77
								1.18	0.35		2.25	1.19
								0.6	1.09		0.73	0.45
								0.28	0.99		3.34	0.05
								1.26	0.05		0.81	0.36
								0.24	0.42		1.37	0.39
								0.13	1.04		0.35	0.18
								0.56	2.74		0.06	0.11
								0.44	2.9		0.9	0.19
								0.33	1.51		0.38	0.12
								0.73	0.32		0.03	1.19
								0.15	0.41		0.18	0.54
								0.43	0.45		0.28	0.12
								0.38	0.57		1.24	0.26
								0.49	1.2		1.28	0.58
								0.37	0.85		1.06	0.27
								1.86	0.05		0.56	0.52
								0.41	1.75		0.24	0.92
								0.34	1.18		0.28	0.89
								0.47	0.12		0.12	0.89
								0.86	0.11		1.1	0.51
								0.01	0.84		0.43	0.44
								0	1.71		0.33	0.06
								0.25	0.25		3.56	0.62
								0.64	0.51		0.32	0.87
								0.05	0.49		0.84	0.92
								3.35	0.56		0.32	0
								0	2.07		1.31	0.31
								0.29	0.08		1.08	0.67
								0.84	0.77		1.4	0.6
								2.19	0.62		0.19	0.99
								0.05	0.3		6.1	0.69
								0.61	0.47		1.3	0.04
								0.95	0.1		0.38	0.08
								1.26	1.04		0.47	0.17
								0.1	0.41		0.71	0.37
								0.32	0.17		0.42	1.18
								0.03	1.43		0.73	1.13
								0.7	0.31		2.77	0.36
								0.94	1.23		1.12	0.41
								0.95	0.69		0.4	0.44
								0.36	0.15		0.41	0.02
								0.95	1.11		0.48	0.36
								1.45	1.07		1	0.19
								0.57	1.68		1.43	1.26
								0.03	0.28		1.86	0.04
								1.24	0.18		1.37	0.42
								1.02	0.33		0.58	0.16
								0.96	0.35		1.04	0.09
								0.54	2.01		0.56	0.8
								0.09	0.48		0.51	0.31
								0.34	0.48		0.43	0.78
								0.96	0.5		0.73	1.73
								0.03	0.23		1.12	1.3
								0.02	0.09		0.17	1.51
								1.19	0.11		0.06	0.74
								0.47	1.33		0.72	0.22
								1.91	0.19		0.97	1.41
								0.05	0.02		2.46	0.37
								0.46	0.37		0.99	0.33
								0.25	0.93		1.42	0.77
								0.32	0.46		1.23	0.06
								0.29	0.32		0.36	0.01
								0.26	0.48		0.03	1.83
								0.04	0.36		0.36	0.26
								1.16	0.94		1.15	0.27
								0.29	2.21		2.08	0.05
								0.25	0.37		1.39	0.4
								0.34	0.32		2.79	0.91
								0.33	0.43		0.43	1.75
								1.82	0.51		0.31	0.33
								0.14	1.35		1.16	2.39
								0.12	0.02		0.93	1.31
								0.31	0.38		2.03	0.45
[truncated: 101,436 more rows]
