# Supplementary material for: A neurotrophin functioning with a Toll regulates structural plasticity in a dopaminergic circuit
Source: eLife. 2024 Dec 20;13:RP102222. doi: 10.7554/eLife.102222 (PMC11661795; doi:10.7554/eLife.102222)
Supplement: Figure 5—source data 1. [file elife-102222-fig5-data1.xlsx]

## Sheet: Figure 5 source data 1
Sun et al A neurotrophin functioning with a Toll regulates structural plasticity in a dopaminergic circuit
Figure 5B. Effect of activity with TrpA1 on Homer+ spots in DNT-2 neurons
Genotype	No. Homer+ spots		Genotype	No. Homer+ spots
DNT2Gal4>UASHomer-GCaMP3.0	97		DNT2Gal4>UASHomer-GCaMP3, UASdTrpA1	147
	97			256
	111			532
	285			334
	227			334
	238			238
	121			594
	343			404
see Supplementary File 2
