# Supplementary material for: A neurotrophin functioning with a Toll regulates structural plasticity in a dopaminergic circuit
Source: eLife. 2024 Dec 20;13:RP102222. doi: 10.7554/eLife.102222 (PMC11661795; doi:10.7554/eLife.102222)
Supplement: Figure 5—source data 2. [file elife-102222-fig5-data2.xlsx]

## Sheet: Figure 5 source data 2
Figure 5C. Stimulating DNT-2 neurons induced synaptogenesis in PAM neurons
Data used to generate graphs in Figure 5C. See Supplementary File 2
	SMP Dendrite							MB lobe
	Number of Syt-GCaMP6+ synapses			Volume of Syt-GCaMP6+ synapses				Number of Syt-GCaMP6+ synapses			Volume of Syt-GCaMP6+ synapses
Genotype	DNT2>TrpA1, R58E02>syt-GCaMP6 18ºC	DNT2>TrpA1, R58E02>syt-GCaMP6 30ºC		DNT2>TrpA1, R58E02>syt-GCaMP 18ºC	DNT2>TrpA1, R58E02>syt-GCaMP6 30ºC		Genotype	DNT2>TrpA1, R58E02>syt-GCaMP6 18ºC	DNT2>TrpA1, R58E02>syt-GCaMP6 30ºC		DNT2>TrpA1, R58E02>syt-GCaMP6 18ºC	DNT2>TrpA1, R58E02>syt-GCaMP6 30ºC
	2217	2983		0.33	0.23			3232	3939		0.01	1.08
	990	3194		0.51	0.12			3113	3654		1.17	1.03
	2573	3704		0.26	0.58			4191	3383		1.54	1.76
	2364	2966		0.19	0.73			4098	3675		0.44	1.01
	5125	3118		1.55	1.76			3594	3778		0.12	0.02
	2620	2343		1	0.85			4124	3763		0.07	0.15
	4120	4919		1.49	1.02			3857	3444		1.3	1.76
	3858	4084		0.57	1.08			3851	3504		2.47	1.34
	1903	3421		0.8	0.46			3126	3418		1.38	0.33
	2649	5299		0.3	1.65			3191	3158		1.21	0.91
	1321	2511		0.94	0.7			3413	3932		0.05	0.18
	3259	3207		1.92	1.21			3428	4459		0.09	1.27
	1949	3237		0.38	0.36			2134	3853		0.28	0.29
	1673	2704		1.72	1.14			2093	3626		0.33	1.79
	3658	5094		0.13	0.81			3044	3972		1.87	0.33
	3081	5180		0.43	1.19			3045	4009		0.6	0.62
	552	4124		0.27	0.72			3653	3376		2.02	0.82
	176	2502		1.11	0.2			3331	3552		0.93	1.12
	1534	2883		2	2.77			3693	3027		2.01	1
	4053	3448		1.46	0.78			3847	3023		1.59	1.23
	3627	2538		0.89	1.38			3921	3500		4.19	1.12
	3083	3411		1.84	0.35			3593	3621		1.23	0.37
	4174	4258		1.88	0.36			3642	2938		1.88	0.93
	4541	2951		1.33	2.1			3546	3155		0.88	0.63
	3601	4169		0.64	0.05			4396	3493		1.97	1.01
	2954	4692		1.92	1.04			4086	3578		1.41	0.1
		2989		0.86	0.37				3147		1.22	0.1
		3318		0.41	0.42				3012		1.52	1.38
				1.67	1.62						1.83	0.61
				0.76	0.72						0.11	0.96
				0.85	0.68						0.18	0.13
				0.57	0.64						0.13	0.82
				0.57	1						0.17	1.07
				0.77	0.95						0.1	0.94
				1.39	0.09						2.15	0.54
				1.54	2.01						1.04	1.42
				0.77	0.78						0.73	2.65
				1.89	1.55						1.99	0.99
				0.56	2.16						0.8	0.76
				1.75	1.6						1.29	2.43
				1.21	0.63						2	1.61
				0.57	0.84						1.16	0.28
				1.37	1.05						0.17	1.34
				0.7	1.73						1.32	0.3
				0.57	1.9						0.52	1.82
				0.74	1.75						1.55	0.01
				1.39	1.23						3.09	1.75
				1.19	2						1.43	1.43
				0.98	0.62						0.28	0.41
				0.64	1.15						0.12	2.8
				0.71	1.07						0.76	0.41
				0.44	0.65						0.6	1.98
				2.37	0.75						0.34	2.21
				0.36	0.97						0.01	0.13
				0.27	0.49						0.91	0.83
				0.48	1.61						1.25	0.37
				0.32	0.71						1.08	1.31
				1.06	1.34						0.65	0.33
				1.11	0.8						1.39	0.71
				1.92	0.88						0	0.88
				0.88	1.58						1.74	0.89
				1.14	0.98						1.02	1.62
				1.03	1.73						1.07	1.22
				1.57	2.88						2.26	2.5
				2.45	1.04						0.67	2.57
				0.48	0.79						0.65	1.12
				1.05	0.4						0.91	0.55
				1.27	1.05						0.67	0.01
				3.25	0.94						1.04	0.35
				0.93	1.83						0.05	1.15
				1.32	0.39						0.09	0.04
				1.14	1.52						0.76	1.25
				1.17	0.71						0.62	2.48
				1.88	0.64						0.32	0.33
				1.36	1.02						0.11	0.16
				1.55	0.15						0.21	2.28
				0.59	0.44						0.73	1.54
				1.7	1.81						1.3	0.02
				0.97	0.54						1.31	1.01
				0.27	1.33						0.77	0.3
				0.65	2.25						1.05	0.35
				1.01	1.2						0.97	0.04
				1.02	0.77						0.34	0.06
				1.33	1.35						1.06	0.5
				3.09	1.47						0.69	1.24
				1.46	0.96						1.28	0.52
				1.92	0.94						2.74	0.17
				1.24	0.92						1.02	0.69
				0.1	0.88						0.53	0.66
				0.96	0.88						1.55	0.05
				0.05	0.59						0.04	1.96
				2.92	0.42						1.24	1.05
				1.4	1.36						3.53	0.14
				1.16	1.09						0.91	1.07
				0.93	1.82						0.82	0.99
				4.46	2.7						1.01	0.95
				1.14	0.84						0.3	0.29
				0.37	2.3						0.45	0.48
				0.78	0.42						0.08	0.36
				1.81	0.4						1.95	0.08
				1.49	0.73						0.92	1.43
				1.4	0.33						2.07	0.12
				0.51	0.4						0.99	1.96
				1.04	0.25						0.91	1.23
				0.86	0.37						0.93	0.56
				2.19	0.35						0.46	1.02
				0.4	0.37						1.41	0.13
				1.11	0.29						0.28	0.62
				2.18	0.63						0.04	0.29
				1.57	1.48						0.29	0.36
				1.97	0.55						2.24	1.4
				1.35	1.08						2.72	0.91
				1.69	1.04						0.99	0.6
				0.92	0.59						1.39	0.31
				3.26	0.73						0.73	0.57
				0.42	0.7						1.24	0.64
				0.52	0.76						1.04	0.29
				0.26	0.55						0.99	0.08
				1.41	0.57						0.96	0.47
				0.4	1.74						0.05	0.82
				2.43	1.66						0.36	0.56
				1.61	1.49						0	1.41
				0	0.45						0.09	2.09
				0.52	2.27						0.42	0.94
				1.59	1.28						0.13	0.25
				1.09	1.5						1.21	1.56
				2.58	1.43						2.99	1.13
				0.05	1.98						0.63	0.48
				0.93	2.23						0.19	1.03
				0.33	1.31						0.21	0.37
				0.71	0.7						1.95	0.45
				0.24	1.13						0.9	0.35
				1.64	1.37						1.24	0.96
				0.52	1.08						0.96	1.15
				0.3	1.52						0.27	0.09
				0.69	3.27						2.53	0.22
				0.44	0.32						0.12	1.07
				0.87	0.92						0.86	0.86
				0.24	1.32						0.8	0.62
				0.06	1.91						1.81	1.13
				0.04	1.31						1.36	1.05
				0.33	0.76						0.14	0.79
				0.97	1.29						1.43	1.06
				0.81	1.08						3.08	0.92
				0.66	0.61						1.03	1.13
				0.63	1.05						1.6	1.4
				1.05	1.08						1.41	1.37
				0.42	0.51						0.05	0.75
				0.35	0.53						1.06	0.4
				0.35	1.02						0.61	0.56
				1.43	0.88						2.33	1.19
				0.72	1.38						1.34	1.58
				0.04	0.52						0.37	0.51
				0.26	1.12						0.79	4.34
				0.39	2.12						0.77	0.38
				1.05	0.5						1.24	1.2
				1.2	1.94						0.29	1.26
				0.78	0.87						1.19	0.81
				1.42	1.51						0	1.32
				1.28	2.47						1.07	0.51
				1.01	3.85						0.83	0.47
				0.82	1.19						0.26	0.47
				0.02	1.31						0.11	0.52
				2.51	1.18						1.45	2.96
				0.72	0.41						0.34	0.67
				0.45	3.03						1.06	1.37
				0.58	0.24						1.8	0.39
				2	0.5						1.24	0.47
				0.57	0.48						0.74	0
				0.62	0.41						1.14	0.39
				0.57	1.21						0.02	2.96
				0.3	1.14						0	0.5
				0.67	0.88						4.94	0.05
				1.16	1.44						2.14	1.29
				1.05	1.13						1.28	0.82
				0.45	0.55						0.96	0.47
				0.46	1.63						1.33	0.28
				1.1	0.37						2.41	3.03
				3.42	1.33						0.3	0.87
				1.61	0.4						3.28	0.76
				0.29	1.7						0.78	0.16
				0.78	0.59						0.96	2.24
				0.03	0.99						1.22	0.39
				0.79	1.19						0.67	0.05
				0.44	0.21						0.57	1.52
				0.86	0.65						0.73	0.88
				0.57	3.4						1.3	0.68
				0.97	0						0.49	0.37
				1.45	0.04						1.77	1.32
				1.61	0.12						0.96	1.47
				0.94	0.38						0.23	1.04
				1.26	0.77						1.56	2.31
				1.09	0.25						0.37	2.78
				0.5	1.47						1.17	0.57
				2.09	2.34						1.26	0.43
				2.3	0.72						0.07	1.66
				1.69	1.04						1.31	1.28
				1.58	3.32						2.25	0
				1.49	0.49						1.76	1.15
				2.43	0.64						1.67	1.13
				1.68	0.49						1.36	0.87
				2	0.8						0.88	0.32
				1.16	0.34						1.34	0.66
				2.06	0.52						0.98	2
				1	1.27						0.58	0.62
				0.77	0.91						0.23	0.77
				3.05	1						0.72	1.77
				0.78	1.75						0.98	0.64
				1.72	0.28						0.83	2.75
				0.46	0.05						0.4	1.3
				1.99	0.28						1.39	0.05
				1.32	1.61						3.26	3.62
				1.34	0.46						1.65	0.79
				1.96	0.11						0.84	0.03
				0.09	0.82						0.46	0.81
				0.5	0.59						2.02	1.08
				2.59	0.61						0.12	1.59
				1.45	0.73						0.57	2
				1.1	0.05						1	0.39
				1.24	1.03						2.08	0.15
				0.39	1.25						2.1	1.14
				2.17	0.78						0.36	0.82
				0.78	1.16						0.64	1.12
				1.89	0.01						0.51	1.44
				0.53	0.47						0.29	0.79
				1.03	3.08						1.61	4.21
				1.78	0.56						0.02	0.95
				0.49	0.12						3.16	0.54
				1.97	0.65						1.1	0.59
				1.04	2.34						1.01	1.92
				1.37	0.28						2.56	2.4
				0.97	1.47						0.92	0.46
				0.76	0.47						0.24	0.46
				4.57	2.48						0.4	0.06
				0.98	0.31						1.08	1.58
				1.26	0.61						0.62	0.92
				0.4	0.32						1.36	1.76
				0.48	0.13						1.09	1.85
				0.57	0.69						1.53	1.11
				1.9	0.92						0.05	2.34
				0.45	0.01						0.41	2
				0.48	1.21						0.05	2.32
				1.97	0.3						1.17	1.62
				0.48	0.39						1.88	0.93
				1.04	0.45						1.1	2.11
				1	0.23						0.61	0.2
				1.33	0.38						0.63	1.06
				2.01	1.32						0.99	0.66
				1.08	0.66						0.47	1.15
				0.49	3.02						0.08	0.33
				0.38	0.31						1.15	0.2
				0.14	0.87						0.77	0.44
				1.68	0.12						0.46	0.88
				0.48	1.37						2.07	0.85
				1.35	0.09						1.61	1.67
				0.37	2.15						0.69	0.48
				1.63	1.08						0.09	0.04
				0.37	0.88						0.1	0.29
				0.49	0.3						0.18	2.44
				2.06	2.05						0.79	0.64
				0.54	2.38						0.94	0.95
				2.03	2.06						1.04	0.71
				0.34	0.07						0.84	0.92
				1.11	1.8						0.03	0.69
				4.82	0.56						0.64	3.15
				0.08	0.04						2.05	1.02
				0.05	0.42						1.14	0.04
				0.77	0.12						0.25	1.33
				1.9	0.36						1.29	1.52
				1.38	0.79						0.15	1.65
				1.16	0.38						0.97	0.96
				1.37	0.24						0.4	0.16
				0.27	0.2						0.61	0.94
				1.95	2.03						0.07	0.04
				1.25	0.66						0.07	0.8
				0.12	1.06						0.43	0.09
				0.57	0.09						1.07	0.3
				0.6	0.15						0.59	0.37
				0.48	0.31						1.5	0.36
				0.46	0.17						2.92	0.02
				0.97	0.54						0.6	0.35
				0.97	0.02						0.41	1.25
				0.47	0.49						2.44	0.75
				0.62	0.15						7	0.31
				0.11	0.25						1.04	2.47
				0.08	2.41						3.64	0.13
				1.07	1.3						0.75	0.88
				1.01	1.48						1.3	1
				0.84	0.56						1.2	1.19
				0.57	0.49						0.3	3.02
				2.21	0.31						2.92	0.04
				0.11	1.06						0.62	0.34
				0.99	0.65						0.59	0.44
				0.47	0.29						0.84	0.36
				0.85	1.73						0.76	0.03
				1.47	1.01						1.02	0.91
				1.08	0.22						1.18	0.26
				2.9	0.32						0.42	0.36
				1.36	2.19						1.09	0.31
				2.28	1.64						1.3	0.46
				0.49	1.64						0.05	0.84
				0.04	0.29						0.48	0.09
				0.66	0.88						0.94	1.02
				0.06	0.62						0.37	1.16
				0.39	0.46						2.49	0.27
				1.09	0.88						0.4	0.91
				0.29	1.02						0	0.29
				2.27	0.95						2.24	1.65
				1.02	2.22						0.45	0.67
				0.45	3.83						1.02	0.34
				1.86	0.66						0.88	0.43
				1.04	0.19						0.26	2.22
				0.33	0.91						1.44	2.02
				1.37	0.72						1.24	0.37
				1.22	2.72						0.06	0.45
				0.49	2.6						0.68	0.51
				0.23	0.29						0.5	0.42
				1.21	1.26						0.05	0.59
				0.05	1.1						0.39	1.33
				1.12	0.73						0.68	1.31
				0.5	1.91						2.12	0.16
				1.48	0.83						0.84	0.57
				2.01	0.43						0.23	0.4
				1.38	1.09						0.02	0.4
				0.79	0.59						0.85	0.44
				0.41	0.79						0.19	1.27
				1.1	1						4.45	0.73
				0.74	1.18						1.43	0.72
				1.38	0.39						3.44	0.66
				0.49	1						0.31	0.9
				0.52	0.37						0.08	0.34
				0.63	0.24						0.04	0.94
				0.79	0.31						1.92	2.18
				0.07	0.46						0.12	0.34
				0.01	1.23						1.5	0.06
				0.48	1.26						0.96	0.11
				0.94	0.27						0.05	0.49
				1.03	0.62						1.32	0.56
				1.01	0.53						0.01	1.02
				0.79	1.06						0.7	1.56
				1.39	0.71						0.18	0.33
				0.51	2.04						2.63	1.31
				0.18	1.53						0.52	0.05
				1.51	0.73						0.78	0.14
				0.05	1.15						0.04	0.93
				1.96	1.82						1.19	0.77
				2.1	0.35						0.4	2.43
				0.83	0.24						1.57	1.33
				0.57	0.19						0.35	0.04
				0.47	1						0.32	0.3
				0.52	2.17						0.95	1.52
				1.62	1.57						1.4	0.74
				1.11	1.24						0.82	1.54
				0.66	0.58						0.04	1.44
				0.39	1.44						0.09	0.4
				1.2	0.77						0.65	0.53
				1.53	0.83						1.05	0.1
				0.76	0.33						0.82	0.27
				1.93	0.23						0.99	0.93
				1.03	0.42						2.14	0.72
				1.18	0.89						0.11	0.02
				0.38	0.37						0.33	0.25
				0.5	1.77						0.25	0.36
				0.9	1.23						0.5	0.95
				0.83	1.97						0.48	0.46
				0.04	0.46						0.86	0.02
				0.39	0.38						0.95	0.25
				0.72	0.32						0.24	1.41
				0.84	0.76						1.32	1.1
				1.21	0.88						0.66	0.51
				2.49	0.64						0.24	0.91
				1.65	0.85						1.22	1.17
				0.32	0.66						0.83	0.41
				1.25	2.22						1.58	0.37
				1.04	2.1						1.9	4.16
				0.3	0.97						1.3	0.44
				1.21	0.7						1.42	0.55
				1.72	1.11						1.51	0.11
				1.53	3.05						0.04	0.22
				1.69	1.26						0.67	0.46
				0.34	1.05						2.18	3.43
				0.77	0.17						0.43	0.5
				1.21	0.34						0.83	1.17
				1.01	0.82						1.2	0.71
				1.54	0.85						1.76	1.75
				0.96	0.32						0.54	0.96
				0.87	2.67						3.54	0.11
				0.34	1.63						2.19	0.74
				1.46	1.5						0.42	1.35
				2.9	1.57						1.95	0.24
				0.83	0.33						1.52	0.82
				0.64	0.48						1.53	1.11
				1.15	0.97						0.02	0.2
				1.54	1.32						1.71	2.5
				2.73	0.55						0.22	0.83
				0.43	2.18						1.17	0.4
				1.03	1.49						2.45	0.04
				2.54	0.05						0.87	0.25
				1.76	0.39						1.27	0.09
				2.12	0.32						0.46	1.09
				0.3	0.06						1.08	1.2
				0.96	1.09						0.36	1.69
				5.53	0.84						0.94	0.11
				0.74	0.59						1.41	0.92
				2.71	0.37						0.05	2.81
				0.78	1.84						0.56	0.73
				1.66	2.12						0.75	0.2
				0.56	0.26						2.86	2.13
				1.22	0.15						0.88	0.45
				1.23	0.04						1.18	0.11
				0.57	1.32						2.96	1.83
				1.73	0.91						1.13	2.17
				0.8	0.37						1.95	2.65
				2.49	0.02						2.42	0.97
				1.91	0.26						1.94	1.02
				2.03	0.06						1.25	2.31
				0.78	1.1						0.06	1.15
				0.16	0.09						0.78	0.05
				0.98	1.12						1.11	1.64
				0.74	0.47						1.1	0.83
				1.05	0.22						2.58	0.56
				0.36	0.44						0.4	0.81
				0.66	0.05						0.48	3.32
				3.26	0.42						0.36	2.35
				1.32	0.58						0.69	0.22
				1.2	0.24						1.18	1.18
				0.15	2.73						1.19	1.8
				0.6	0.82						0.38	0.95
				0.03	1.49						1.25	0.36
				0.66	0.22						0.83	0.71
				0.86	0.35						1.23	0.11
				1.72	0.05						0.67	0.25
				0.5	0.86						0.03	1.64
				1.4	0.37						1.21	0.43
				0.58	0.26						1.67	1.03
				1.24	0.48						0.75	0.21
				1.34	1.89						1.38	2.19
				0.79	0.6						1.38	0.69
				0.88	0.8						0.9	0.53
				2.09	0.72						0.76	1.36
				0.12	0.87						1.1	0.22
				0.74	0.74						1.41	1.52
				1.28	1.33						0.37	0.53
				2.7	0.36						1.1	0.72
				0.49	0.2						0.82	2.74
				1.4	0.12						0.94	0.15
				3.1	1.22						0.54	0.32
				0.08	0.49						1.57	0.43
				0.01	0.27						0.53	0.26
				0.5	0						0.05	1.05
				1.07	0.59						2.25	0.56
				0.49	0.84						0.15	0.55
				1.24	0.85						1.56	1.38
				0.96	0.44						0.82	0.41
				2.54	0.79						1.33	1.06
				2.26	0.95						0.87	0.7
				1.41	1.25						0.04	2.26
				0.53	0.36						0.7	1.31
				0.69	2						0.04	1.17
				1.99	0.78						0.94	0.83
				1.97	0.36						0.16	1.39
				0.68	0.69						0.34	1.9
				0.79	0.7						1.05	1.21
				0.76	2.54						0.51	1.63
				1.61	1.9						2.28	1.25
				2.88	0.37						1.03	0.83
				0.75	1						0.05	0.8
				0.8	2.88						0.12	2.4
				1.57	1.84						0.65	0.04
				1.36	0.85						1.57	0.45
				0.25	0.94						0.37	0.72
				1.05	0.35						0.99	0.58
				0.71	0.52						0	0.47
				0.51	0.51						0.49	0.46
				1.61	0.32						0.56	0.14
				1.78	0.75						0.8	0.47
				1.07	0.22						0.31	0.05
				1.98	0.49						0.04	0.19
				2.43	0.26						1.29	0.11
				2.17	0.55						3.23	1.07
				2.06	0.47						0.69	1.77
				2.07	0.42						0.89	1.27
				0.25	0.66						0.8	1.54
				0.85	2.79						0.71	0.34
				1	1.66						0.92	0.9
				1.53	0.8						2.32	0.44
				0.2	0.28						0.49	1.21
				0.85	0.14						0.8	1.25
				0.34	0.79						1.4	1.3
				2.5	0.32						0.47	0.79
				0.46	2.06						0.28	0.05
				0.88	0						0.09	1.04
				0.92	0.63						0.08	1.12
				0.64	1.06						1.17	1.48
				1.2	0.91						0.74	0.9
				0.85	0.5						0.35	0.08
				0.9	0.55						1.85	1.19
				1.38	1.83						1.07	1.66
				0.14	1.16						1.17	0.08
				1.1	0.47						0.62	1.08
				3.24	1.04						0.83	0.4
				1.27	0.23						1.31	0.33
				1.98	0.04						0.47	1.02
				0.66	1.22						0.61	0.68
				0.53	0.48						1.1	1.06
				2.14	0.19						1	1.95
				2.64	1.23						0.19	0.35
				0.4	1.07						2.22	1.88
				1.12	2.73						1.21	1.05
				0.12	0.22						1.35	0.33
				0.7	0.41						1.36	2.54
				0.64	0.28						0.5	0.07
				0.55	1.09						1.46	1.05
				1.29	2.06						0.16	3.6
				1.02	0.39						1.44	0.38
				1.37	0.44						0.72	1.27
				1.66	1.09						0.41	0.21
				0.95	1.28						0.51	3.48
				0.56	1.15						1.12	0.49
				1.13	0						0.52	0.73
				0.73	0.04						0.37	1.4
				1.21	0.65						0.81	0.49
				0.37	0.84						2.12	1.63
				0.49	0.61						0.74	1.16
				1.03	0.68						0.52	2.1
				1.37	0.54						1.06	1.89
				0.36	0.44						0.12	0.58
				1.35	0.35						0.02	0.41
				0.68	1.04						2.73	1.08
				0.92	0.37						0.21	1.5
				1.37	0.7						0.28	0.22
				0.55	1.38						1.14	0.08
				1.11	3.13						0.49	0.1
				1.18	3.3						0.48	0.38
				2.04	1.83						0.37	0.41
				0.48	0.51						0.81	0.57
				0.89	0.93						1.21	0.33
				2.06	3.01						0.05	0.64
				0.07	1.3						1.01	0.16
				1.44	0.87						0.34	1.58
				0.5	0.84						0.46	0.71
				0.92	0.55						1.75	0.99
				1.27	0.8						0.45	0.48
				0.85	0.67						3.1	0.26
				1.89	1.84						0.84	1.02
				3.28	0.12						0.33	0.5
				3.46	0.23						0.32	0.68
				0.69	1.5						1.38	0.01
				0.66	1.03						1.39	0.32
				0.19	0.63						0.94	0.45
				1.59	1.46						0.07	0.7
				2.3	0.02						0.64	1.08
				0.3	2.06						0.35	0.28
				0.33	0.85						1.31	1.24
				0.3	1.45						1.21	1.39
				1.02	0.91						2.02	0.39
				1.42	0.02						1.74	1.27
				0.92	1.77						1.01	0.34
				0.24	0.71						0.37	0.57
				0.29	1.04						0.04	0.05
				1.64	0.57						0.34	0.41
				1.97	1.19						1.81	1.08
				0.3	0.04						0.05	1.38
				1.24	0.65						0.27	0.94
				1.45	0.02						1.29	0.63
				0.45	1.59						0.05	0.04
				0.28	0.67						1.5	0.27
				1.38	1.12						0.1	1.82
				0.35	1.81						0.17	1.67
				1.74	1.07						1.28	1.07
				1.37	0.13						1.05	0.51
				0.38	0.03						0.08	0.96
				0.63	3.28						0.46	0.35
				1.44	0.19						0.03	0.4
				0.66	0.47						0.04	1.9
				1.2	1.93						1.43	1.08
				0.61	0.11						1.79	1.05
				1.08	2.12						1.27	0
				0.36	1.67						1.93	0.73
				0.74	1.43						0.08	0.93
				1.23	0.52						0.65	1.12
				0.4	0.52						0.33	0.43
				2.12	0.17						0.16	1.36
				0.98	0.23						0.59	1.18
				0.43	1.35						1.05	1.54
				0.9	1.37						1.24	0.71
				1.17	1						0.53	1.27
				1.04	0.05						0.43	1.51
				0.12	1.22						0.78	0.89
				1.35	0.97						0.48	0.4
				1.39	3.43						1.15	0.86
				0.81	1.81						0.72	0.86
				1.41	0						1.39	0.54
				1.38	0.13						0.64	1.23
				0.41	0.05						0.63	0.01
				0.19	1.07						0.38	0.37
				1	2.67						0.19	0.91
				0.29	0.17						1.39	0.1
				0.74	0.81						0.04	1.07
				0.85	0.5						0.37	0.05
				1.59	2.77						1.24	0.56
				1.06	1.28						1.37	0.41
				1.53	4.03						0.49	0.38
				2.08	0.05						0.49	1.71
				3.38	0.14						1.22	0.51
				0.55	1.03						0.41	0.83
				2.37	4.1						1.66	0.78
				0.58	2.15						0.12	0.45
				1.32	0.43						0	0.93
				2.97	0.1						0.73	1.81
				0.33	0.22						1.16	1.4
				0.43	1.31						0.06	1.39
				2.29	0.15						0.62	1.9
				2.88	0.22						0.03	0.33
				0.06	0.03						0.29	0.47
				0.45	1.65						0.99	1.9
				0.41	0.36						0.77	0.51
				1.04	0.64						0.42	0.43
				0.01	2.26						1.08	0.45
				0.01	0.45						0.37	0.39
				1.15	1.13						0.64	0.6
				1.64	0.33						0.89	3.6
				0.28	0.14						1.19	0.75
				2.82	0.87						0.05	0.02
				0.13	0.26						1.26	0.72
				0	0.65						0	1.57
				1.89	1.95						0.33	1.95
				0.13	0.53						0.21	0.22
				1.29	0.2						0.22	1.23
				2.99	1.2						5.34	2.09
				0.02	0.31						1.05	0
				1.13	0						1.38	0.25
				0.45	2.04						0.48	1.63
				1.2	1.29						0.46	1.23
				2.02	0.49						0.7	0.45
				0.47	0.64						0.19	0.14
				1.77	0.29						1.26	2.23
				2.63	1.89						0	1.13
				0.48	4.31						1.35	1.93
				0.41	1.37						1.07	0.36
				3.68	4.12						0.98	2.42
				0.09	1.46						0	0.27
				0.3	1.06						0	0.39
				0.05	0.8						1.1	0.43
				0.77	1.68						0.38	0.13
				3.37	1.17						1.43	0.73
				5.57	1.84						1.22	1.57
				0.03	0.27						1.23	1.25
				3.12	1.49						1.29	0.51
				0.87	0.34						0.67	0.4
				2.84	2.48						0.81	1.2
				0.93	0.66						0.11	2.03
				0.01	2.66						0.24	0.87
				0.37	1.05						0.89	0.02
				0.52	0.27						0.14	0.64
				5.16	0.24						0.33	0.34
				0.08	0.95						0.41	5.38
				0.28	1.01						2.56	0.26
				2.69	0.49						2.89	0.45
				0.39	1.48						0.18	0
				0.96	0.59						0.35	0
				0.55	0.02						2.44	0.34
				1.24	0.12						0.3	0.03
				1.34	0.77						0.07	0.01
				4.37	0.87						0.9	1.55
				1.16	2.28						0.45	0.29
				2.26	1.82						1.38	1.04
				1.71	1.59						0.14	0.47
				2.94	0.17						0.27	0.13
				0.12	2.74						0.95	0.13
				1.41	0.3						1.03	0.7
				0.93	0.83						0.8	0.77
				0.42	0.51						0.03	0.17
				0.38	0.51						2	1.47
				0.64	0						0.2	0.84
				0.39	0.01						0.23	0.28
				0.52	0.28						0.49	0.52
				0.78	7.7						0.64	0.05
				0.2	1.46						0	0.49
				0.37	0.34						0.01	2.47
				0.87	1.02						0.8	0.33
				0.45	0.5						0.37	0.3
				0.24	3.06						1.94	0.11
				0.15	0.8						0.45	0.38
				1.84	2.12						0.65	0.32
				0.09	0.22						0.72	0.63
				1.36	0.81						0.87	2.03
				0.71	0.19						0.4	0.4
				0.18	0.98						0.43	0.11
				1.15	2.57						0.16	0.28
				0.48	1.08						0.04	2.59
				0.12	1.72						0.75	0.55
				0.57	1.15						0.95	0.09
				0.1	1.62						0.26	0.08
				1.06	1.13						0.13	0.48
				0.35	3.97						0.49	0.25
				1.44	0.36						0.33	0.9
				0.04	0.38						0.68	0.68
				1.01	0.24						0.47	0.43
				0.83	0.71						0.95	0.18
				0.48	1.42						0.84	1.15
				0.19	0.34						0.86	0.38
				1.64	0.37						0.16	0.17
				1.03	1.4						0	0.53
				1.35	0.6						0.37	0.86
				0.4	1.41						0.09	1.35
				0.37	0.04						0.92	0.27
				0.95	0.69						1.66	0.36
				1.62	0.44						1.15	0.37
				0.09	0.3						0.37	0.55
				0.04	0.63						0.38	0.86
				1.39	0.57						1.73	0.81
				0.91	0.39						0.41	0.1
				1.35	0.09						0.86	0.97
				1.4	1.86						1.89	0.37
				1.49	1.87						1.05	0.23
				0.25	2.55						0.14	0.68
				1.88	0.72						0.09	1.29
				0.13	1.19						1.7	1.86
				0.8	1.36						0.15	0.3
				1.37	0.65						0.48	0.24
				2.1	0.03						0.03	0.86
				1.84	0.34						0.27	0.76
				0.55	0.7						0.41	1.27
				1.14	0.47						0.34	0.71
				0.3	0.03						1.44	0.16
				1.18	0.52						0.89	0.13
				1.49	0.5						0.85	1.3
				0.13	0.34						0.37	0.46
				1.2	2.02						0.02	0.37
				2.12	1.12						1.09	0.04
				0.3	2.66						0.79	0.42
				0.89	2.09						1.11	0.18
				0.69	1.3						1.06	1.4
				1.45	0.64						2.88	0.25
				1.54	0.51						1.01	2.31
				0.96	0.62						0.1	0.78
				0.37	1.27						1.14	0.36
				0.46	0.45						0.93	1.25
				0.21	0.94						0.48	0.31
				1.97	1.1						3.77	1.48
				0.78	1.06						0.43	0.12
				1.05	3.27						0.42	0.44
				1.11	0.1						0.21	0.4
				0.48	0.69						0.1	0.08
				0.72	0.64						1.18	0.52
				0.21	0.96						0.96	2.98
				0.86	1.65						0.27	1.21
				0.87	1.88						0.58	1.09
				0.1	0.92						0.43	4.88
				0.06	0.76						0.2	0.21
				0.39	0.82						0.11	1.07
				2.38	0.5						0.37	1.81
				1.17	0.77						0.6	0.77
				1.16	0.64						1.83	1.46
				0.93	0.05						0.4	1.78
				1.72	2.93						0.34	0.37
				0.09	1.9						0.01	0.26
				1.15	0.69						0.13	1.55
				1.06	1.65						1.2	0.55
				1.12	0.3						0.86	0.08
				1.98	1.81						0.37	0.05
				0.92	0.64						0.27	1.6
				0.31	0.76						0.76	0.42
				0.58	3.13						0.01	0.73
				1.64	0.24						0.41	1.01
				1.11	1.12						0.78	0.35
				0.36	0.88						0.42	0.83
				0.49	1.16						0.26	0.84
				0.49	0.35						0.68	0.94
				1.19	0.05						0.42	2.83
				1.08	0.99						0.63	0.87
				1.79	1.04						0.67	0.02
				0.38	0.29						0.45	1.93
				0.05	0.91						0.23	0.09
				0.96	0.94						0.53	0.1
				0.51	0.36						0.94	1.7
				0.68	1.54						0.11	0.05
				2.06	1.12						0.34	0.41
				0.43	0.11						0.5	0.94
				0.23	1.29						4.56	0.6
				3.55	0.07						1.58	0.83
				1.26	2.08						1.42	0.44
				1.06	0.54						1.25	0.24
				1.42	1.13						0.26	0.1
				0.75	1.9						1.49	0.81
				0.82	0.38						0.56	0.43
				0.9	2.06						0.35	0.02
				0.4	1.14						0.11	0.4
				0.27	0.11						0.91	0.1
				0.09	1.6						0.59	1.26
				0.04	0.7						1.11	0.27
				0.27	3.15						0.13	1.2
				1.21	0.59						0.78	0.31
				1.11	1.01						0.76	0.46
				1.14	1.69						0.73	1.34
				0.46	0.38						0.05	0.32
				1.33	0.09						0.44	0.28
				0.02	1.29						0.82	0.03
				1.85	0.57						1.24	0.13
				1.26	0.32						0.28	0.09
				0.71	0.09						0.7	0.8
				1.7	0.19						0.31	0.2
				0.26	0.12						0.97	1.01
				1.49	0.31						0.38	1.28
				0.37	0.62						0.01	0.13
				0.86	1.47						1.84	0.29
				0.09	1.33						1.39	0.32
				1.7	1.18						0.38	0.36
				0.03	0.13						0.45	0.56
				3.76	1.01						0.12	1.03
				0.81	0.04						1.08	0.31
				1.31	1.29						0.16	1.15
				0.58	0.83						0.28	1.18
				1.19	0.01						1.22	0.91
				0.4	0.04						1.39	0.21
				0.13	0.76						0.53	0.14
				0.46	0.12						0.1	0.05
				0.33	1.94						1.41	1.1
				0.56	0.31						0.54	1.28
				0.53	0.26						0.05	0.34
				0.39	0.42						0.05	0.4
				3.9	0.39						0.02	0.14
				1.24	0.72						0.28	0.54
				0.5	0.46						2.1	0.34
				0.12	0.7						1.87	0.82
				2.48	0.75						0.33	1.19
				1.28	0.75						0.23	2.21
				1.74	0.9						0.48	0.13
				2.44	1.87						1.02	1.33
				3.3	0.55						1.25	0.41
				2.72	1.42						0.26	1.25
				1.06	0.36						0.64	0.27
				1.35	1.49						0.44	1.88
				1.74	0.67						0	0.7
				1.91	0.91						0.07	0.27
				0.96	0.05						1.72	1.22
				1.47	0.2						0.06	0.16
				0.22	0.12						0.23	0.24
				0.92	0.02						0.99	0.52
				2.87	0.63						0.54	1.17
				0.59	0.37						0.12	0.59
				1.69	1.1						3.1	0.46
				1.22	1.05						0.67	0.46
				0.07	0.08						0.07	0.13
				1.13	0.29						0.03	0
				2.26	1.29						0.01	1
				1.49	0.39						1.62	0.04
				0.52	2.27						0.49	1.25
				2.09	0.32						0.25	0.8
				0.75	2.34						0.29	0.33
				1.33	0.45						1.18	0.59
				0.33	0.67						0.06	1.48
				1.22	0.78						1.41	0.57
				1.73	0.99						0.73	0.29
				0.88	1.07						0.22	1.13
				1.82	1.19						0.7	0.41
				0.46	1.43						0.01	0.35
				1.35	0.82						0.37	0.36
				1.08	0.12						0.32	0.66
				1.23	0.82						0.25	1.39
				0.55	0.37						1.92	0.35
				2.93	0.02						1.64	0.99
				0.23	0.09						0.22	0.45
				1.35	0.48						1.05	0.15
				0.04	1.27						0.29	0.05
				0.05	0.98						0.09	1.58
				0.42	0.43						1.04	1.14
				0.78	1.44						1	0.28
				0.09	0.45						0.03	2.41
				1.11	0.05						0.95	0.9
				1.21	2.4						0.19	1.06
				1.11	0.88						0.56	0.05
				1.06	2.95						0.36	0.38
				1.64	0.49						0.54	1.84
				0.29	0.03						0.56	0.44
				1.5	0.36						0.33	1.2
				1.11	0.12						2.16	1.92
				0.04	1.05						0.57	0.37
				2.01	0.12						0.79	0.23
				0.91	1.42						2.16	0.34
				1.97	0.3						2.09	0.49
				1.06	0.37						0.51	0.95
				0.77	0.37						0.42	0.18
				3.51	0.47						0.02	0.55
				0.46	0.85						0.39	2.21
				0.36	0.12						0.23	0.13
				0.08	0.12						0.15	0.16
				0.41	0.3						0.09	0.23
				0.39	1.69						0.04	0.11
				3.4	0.06						0.78	0.5
				0.46	2.87						0.12	0.8
				0.87	1.21						0.1	0.11
				2.11	0.46						1.33	0.38
				1.82	0.43						0.48	1.26
				2.2	0.41						0.18	0.21
				0.36	1.11						0.58	0.51
				1.89	0.41						1.68	1.12
				0.45	0.87						0.54	0.85
				0.3	0.54						0.11	0.73
				2.61	1.24						0.03	0.57
				1.67	0.79						5.23	0.22
				0.06	0.51						1.42	0.45
				0.65	2.24						0.69	0.8
				1.54	0.86						0.8	0.49
				1.1	0.5						0	0.58
				0.84	0.35						0.31	0.08
				1.08	1.29						3.19	0.55
				2.72	0.14						0.6	0.69
				1.25	0.77						0.27	0.34
				3.57	1.14						0.52	0.98
				2.16	0.72						1.55	1.49
				1.83	0.58						0.03	0.85
				0.48	0.04						0.09	0.27
				2.1	0.41						0.01	0.02
				2.6	0.31						1.02	1.23
				0.87	0.2						0.11	1.1
				0.28	0.64						0.28	0.6
				2.47	0.9						0.05	1.12
				1.14	0.35						0.36	0.29
				2.09	0.09						0.54	0.05
				1.14	0.32						0.05	0.44
				3.34	0.67						0.31	0.93
				0.02	0.04						0.31	0.42
				0.07	0.35						0.75	1.49
				5.13	0.12						1.01	0.11
				1.31	2.9						1.43	0.05
				0.41	2.62						0.53	0.75
				1.89	1.53						0.3	0.13
				0.52	2.03						1.34	1.83
				1.82	1.09						2.35	0.38
				1.23	0.02						1	0.2
				1.58	0.35						0.05	0.32
				0.51	1.07						1.14	0.18
				0.99	0.61						0.88	0.18
				0.66	0.43						0.8	1.18
				1.07	0.35						1.24	0.5
				2.84	0.69						0.28	0.88
				1.07	0.09						0.28	0.67
				0.88	0.13						0.37	2.47
				1.81	0.23						1.1	1.17
				1.63	0.65						0.05	1.34
				0.99	0.01						1.17	0.77
				0.95	3.21						0.39	0.73
				1.36	0.19						0.74	0.53
				0.79	0.18						1.16	0.48
				0.53	0.16						0.25	1.52
				0.88	0.01						0	0.24
				0.31	1.13						0.53	0.02
				1.02	3.37						0.15	0.12
				0.51	0.12						0.58	1.85
				0.75	1.89						0.45	0.29
				0.9	0.6						0.39	1.71
				2.71	1.3						0.46	0.54
				0.47	1.04						1.19	0.47
				1.06	1.08						0.33	0.28
				0.14	0.33						0.37	0.99
				1.08	0.27						0.43	1.33
				0.66	0.8						0.07	0.77
				1.33	0.95						0.69	0.37
				0.44	0.04						1.36	0.68
				1.48	2.21						0.49	0.42
				2.2	0.24						3.96	0.45
				1.84	0.37						0.27	0.9
				0.21	1.02						0.4	1.13
				0.88	1.18						0.74	1.64
				2.54	0.34						3.2	0.05
				0.21	1.02						0.35	0.04
				1.91	3.33						0.82	0.53
				0.67	1.64						0.77	1.96
				1.58	1.22						0.84	0.85
				0.49	0.99						0.84	1
				0.29	0.95						0.69	0.26
				1.04	1.12						0	2.93
				1.33	2.7						1.27	0.36
				0.54	1.2						0.08	0.28
				1.01	0.38						0.04	1.41
				0.52	0.46						1.12	0.08
				1.04	1.58						0.23	0.01
				0.84	0.75						1.95	0.64
				0.75	0.22						0.93	0.2
				1.05	0.44						0.63	1.41
				0.3	1.05						0.65	0.92
				0.79	2.06						1.55	0.85
				1.12	1.18						1.03	0.81
				1.81	0.47						2.73	0.89
				0.82	2.99						0.8	0.7
				1.17	0.99						1.32	1.89
				0.45	0.39						1.59	0.61
				0.86	0.91						1.47	0.74
				0.81	0.68						0.48	0.74
				0.75	0.66						0.13	0.24
				1.67	0.52						0.47	0.06
				0.74	0.18						1.24	0.18
				2.71	0.21						0.12	0.15
				0.49	1						0.03	1.02
				1.42	0.53						0.08	1.14
				0.35	1.42						1.16	0.26
				0.48	1.47						0.25	0.69
				1.78	1.8						1.54	0.23
				0.13	0						0.64	0.86
				0.83	1.69						1.07	0.47
				0.66	1.62						2.46	0.39
				0.79	0.76						2.45	1.11
				0.92	2.16						0.69	1.44
				3.01	0.25						0.98	0.27
				0.03	0.98						1.04	0.07
				0.45	1.19						1.68	0.86
				0.78	0.77						0.77	0.03
				0.54	0.74						0.04	0.62
				1.74	1.01						0.25	0.08
				0.4	0.19						0.05	0.13
				1.25	1.53						0.25	0.55
				0.41	1.24						0.08	0.84
				0.57	1						1.43	0.39
				0.34	0.11						0.56	0.55
				1.03	0.11						1.22	0.48
				0.77	0.4						0.41	0.44
				1.61	0.69						0.23	0.51
				0.96	0.94						0.24	0.62
				1.02	1.52						0.59	0
				1.05	0.61						1	0.35
				0.18	1.65						1.6	0.12
				0.94	1.27						0.91	0.61
				1.19	1.17						1.32	0.23
				0.47	0.54						2.44	2.82
				1.44	0.45						0	0.53
				0.85	1.13						0.85	0.37
				3.4	0.97						1	3.06
				0.71	0.3						0.68	0.41
				0.52	0.36						0.87	2.68
				0.41	0.28						0.58	0.02
				0.37	0.1						0.88	1.02
				0.37	0.18						1.01	0.95
				2.81	0.7						0.33	0.22
				0.85	1						1.65	1.42
				0.99	0.39						0.3	0.94
				0.84	0.05						1.04	0.65
				0.18	0.35						0.65	2.07
				0.63	1.19						0.93	1.38
				1.62	0.34						0.54	0.26
				0.49	0.42						1.78	0.86
				0.73	1.34						0.8	0.83
				0.63	1.57						0.12	3.66
				0.38	1.2						1.36	1.29
				1.77	0.7						0.26	1.03
				0.1	1.46						0.97	1.18
				1.89	0.25						0.26	0.45
				0.86	0.37						0.05	0.68
				2.25	1.01						2.05	1.33
				1.92	0.05						0.13	0.46
				3.75	0.35						0.37	0.54
				2.63	1.79						0.63	1.06
				1.09	0.54						1.19	0.32
				1.18	0.51						1.37	1.87
				1.43	0.14						2.3	0.91
				1.13	0.5						1.85	1.14
				1.58	0.09						2.19	0.39
				0.31	0.84						0.79	1.21
				0.5	1.6						0.33	0.68
				2.01	2.16						1	0.04
				0.43	2.78						1.42	1.83
				0.74	0.79						1.11	0.79
				1.49	1.31						0.47	0.54
				3.76	1.16						0.05	0.33
				0.3	0.95						0.35	0.66
				0.83	0.55						0.45	0.52
				1.32	0.88						0.2	0.41
				1.07	1.46						1.21	0.68
				1.39	1.7						2.68	1.39
				0.34	0.71						0.83	1.72
				2.26	0.09						1.5	0.05
				5.71	0.13						0.22	1.06
				0.38	0.04						0.38	0.61
				0.59	1.39						0.39	0.56
				0	0.1						0.65	0.04
				1.49	1.19						1.75	0.71
				1.37	0.17						1.23	0.35
				0.64	0.64						0.8	0.07
				0.07	0.97						0.16	0.05
				3.2	0.31						1.41	1.01
				0.2	0.74						1.19	1.33
				2.77	0.57						0.34	0.44
				0.98	0.1						1.27	0.12
				2.85	1.18						0.6	2.84
				0.2	0.03						0.5	0.45
				0.05	0.14						1.28	1.24
				0.37	0.32						1.34	0.19
				2.89	0.35						1.16	1.34
				0.29	2.37						1.29	0.04
				0.53	0.89						0.34	0.91
				1.52	2.56						0.49	0.96
				0	0.17						1.44	1.52
				1.08	0.48						0.09	0.24
				0.05	0.75						0.18	1.63
				2.41	0.37						2.83	0.08
				0.22	0.33						1.26	2.05
				0.82	0.03						2.24	1.37
				0.04	0.14						1.13	0.93
				2.52	0.65						0.28	0.89
				1.06	0.04						0.38	0.38
				0.47	1.01						0.27	1.22
				0.37	0.57						2.13	1.17
				4.38	0.32						0.7	0.12
				1.55	0.88						1.07	0.55
				0.1	0.75						0.39	0.37
				1.27	1.06						0.58	0.37
				1.51	1.83						0.69	0.56
				0.97	0.98						0.26	0.55
				0.57	0.68						1.25	0.35
				0.05	0.35						0.11	0.12
				1.17	1.99						0.94	0.9
				1.16	1.37						0.96	1.05
				0.45	0.77						0.86	0.83
				0.95	0.06						2.52	0.47
				1.31	0.53						2.8	0.75
				2.65	0.53						0.62	1.33
				3.27	0.89						0.39	0.01
				0.22	0.32						1.19	0.64
				0.46	0.65						0.55	2.13
				0.16	0.18						1.16	0.29
				0.97	1.26						0.66	0.41
				0.87	0.32						0.17	1.68
				2.65	0.84						1.01	0.37
				0	0.59						0.04	0.2
				1.88	0.9						0.98	0.45
				2.49	1.14						0.63	0.21
				0.24	0.55						0.22	1.6
				0.64	1.99						0.04	1.3
				2.34	0.21						0.63	0.25
				0.75	0.89						0.51	0.12
				4.36	0.03						0.65	0.95
				0.05	0.72						0.79	0.16
				2.45	0.26						1.85	0.9
				0.6	1.3						1.19	0.66
				0.76	1.74						0.69	1.81
				0.51	0.35						2.35	1
				0.24	0.2						0.77	0
				1.54	0.07						0.38	0.52
				1.44	2.52						0.14	1.39
				0.49	0.19						1.33	0.41
				0.19	1.3						0.49	1.04
				0.03	0.42						0.42	1.79
				0.48	0.66						1.4	1.14
				1.74	0.57						0.33	0.41
				0.01	0.04						0.6	0.94
				0.88	1.28						0.58	0.35
				0.25	0.24						0.72	0.38
				0.15	1.05						1.26	1.45
				0.68	0.45						0.05	0.26
				1.27	1.64						0.04	0.9
				1.25	0.36						0.3	2.34
				0.87	0.84						2.07	0.62
				0	0.01						0.41	0.68
				0.55	2.2						0.38	0.05
				3.39	0.23						1.66	2.48
				0.32	0.63						1.28	0.36
				0.76	1.15						0.72	1.07
				0.21	1.25						0.15	0.34
				0.35	0.41						1.43	0.46
				2.91	0.91						0.7	0.61
				0.47	1.71						0.44	2.18
				1.07	0.09						1.04	0.43
				0.14	0.75						3.19	0.58
				0.95	0.4						1.1	1.32
				2.49	0.39						0.32	0.37
				3.8	0.49						0.66	2.05
				5.16	0.31						0.52	0.86
				3.85	0.87						0.04	2.34
				2.68	0.6						0.62	0.23
				0.94	0.09						0.68	0.06
				1.31	0.36						5.78	1.75
				0.94	1.17						1.31	0.91
				1.58	0.41						1.09	0.62
				4.35	0.52						0.93	0.07
				1.11	1.49						0.95	0.4
				2.04	0.37						0.12	0.94
				2.19	0.96						0.25	1.03
				3.46	0.97						0.94	0.93
				0.09	0.34						2.43	1.19
				0.53	0.04						1.05	0.03
				1.42	0.38						1.37	0.01
				2.33	2.19						0.33	0.06
				0.46	0.91						1.4	0.36
				0.01	0.2						0.71	0.45
				0.8	3.1						0.78	0.91
				2.11	1.63						1.23	1.2
				1.05	1.6						0.95	0.78
				1.86	1.05						6.63	0.51
				0.03	1.42						0.56	1.72
				0.38	1.8						2.75	1.03
				0.72	2.05						0.32	0.75
				1.31	1.35						0.83	0.75
				1.73	0.9						0.47	1.24
				4.17	0.2						0.16	1.48
				1.38	0.44						0.33	0.21
				1.66	0.87						0.76	1.13
				1.64	1.24						1.12	1.85
				0.54	4.05						1.13	0.38
				1.31	0.15						1.02	0.85
				2	1.06						5.03	0.72
				0.18	0.71						0.46	0.83
				0.77	0.45						0.95	9.09
				1.11	1.62						0.88	1.62
				0.94	0.92						0.98	0.43
				0.16	4.02						0.44	0.5
				0.5	0.69						0.91	0.53
				2.7	0.63						1.03	0.37
				1.07	0.13						2.14	0.82
				1.81	0.81						0.56	0.53
				0.02	1.58						0.31	0.36
				2.69	0.37						0.11	0.87
				1.28	0.2						0.37	0.3
				1.66	0.5						1.27	1.01
				1.32	0.09						1.94	0.27
				2.93	0.34						0.37	3.7
				3.08	0.99						0.27	0.2
				1.9	0.69						0.85	1.05
				0.95	0.4						0.09	0.67
				1.46	1.15						0.47	0.07
				1.72	0.12						2.13	0.86
				1.72	0.03						0.76	0.23
				1.37	0.13						0.06	0
				1.28	2.49						0.21	0.7
				0.79	0.66						0.04	0.54
				2.66	0.58						1.68	0.31
				1.06	1.6						0.95	0.24
				1.7	3.04						0.08	0.88
				0.44	2.14						0.03	4.16
				3.22	0.66						1.19	0.48
				0.89	1.03						0.34	1.51
				0.13	0.86						1.08	0.73
				1.23	0.52						1.59	1.41
				0.55	0.42						1.44	0.61
				2.26	1.74						0.9	0.97
				0.16	1.38						0.12	1.54
				1.71	1.89						0.8	0.77
				1.47	4.1						1.83	0.6
				0.75	0.5						0.85	0.92
				2.07	0.57						1.02	0.64
				1.44	1.15						0.32	1.06
				0.49	1.19						0.6	1
				1.6	1.07						0.59	0.4
				0.52	1.1						1.45	1.24
				1.51	1.34						1.23	1.27
				1.86	0.61						1.39	1.26
				2.01	2.01						0.36	0.75
				1.61	1.13						0.95	0.63
				0.99	0.56						0.03	0.44
				1.31	1.12						2.63	0.62
				1.87	1.59						0.76	0.06
				2.61	1.68						1.14	1.63
				1.22	1.21						1.22	1.41
				0.86	1.29						1.02	0.57
				1.08	2.56						0.67	0.17
				1.69	0.95						1.94	1.6
				1.38	0.99						0.22	0.33
				2.76	0.91						1.48	2.7
				1.2	0.41						0.31	1.66
				1.04	0.67						0.55	1.08
				1.27	2.29						1.24	0.31
				2.28	0.7						0.91	0.85
				2.05	1.19						1.12	1.33
				1.56	0.17						0.01	0.34
				0.36	3.19						0.05	0.65
				0.88	0.95						0.49	1.54
				4.14	0.09						1.86	0.04
				6.44	0.58						0.04	1.58
				0.75	1.65						0.98	1.07
				0.49	1.22						1.08	0.96
				3.35	0.48						1.03	0.82
				0.66	1.12						0.02	1.02
				3.4	2.51						0.66	0.72
				0.77	2.56						0.89	0.5
				1.1	2.81						1.18	0.77
				0.46	1.16						1.3	0.43
				0.15	1.38						1.16	2.4
				0.01	0.11						0.22	0.97
				1.7	0.22						1.1	0.29
				0.51	1.18						1.73	0.37
				0.42	0.73						1.21	1.13
				2.44	0.4						1.43	0.26
				1.73	1.69						0.04	0.32
				0.22	0.08						1.89	0.5
				0.46	1.66						0.04	0.5
				0.86	0.89						1.41	0.87
				0.22	0.59						0.72	1.05
				1.2	4.61						0.4	1.12
				0.86	0.58						0.1	1.92
				0.8	0.12						0.3	0.59
				1.18	0.46						0.24	1.13
				1.3	0.45						0.99	0.1
				0.45	0.45						0.2	1.36
				1.59	2.38						0.28	3.05
				0.27	1.64						0.83	0.51
				0.94	1.98						2.67	0.4
				0.92	0.27						0.59	1.32
				1.02	0.68						1.3	0.44
				1.16	0.7						0.09	0.36
				1.2	0.41						1.26	1.03
				0.25	0.81						0.87	1.23
				0.39	0.1						0.64	1
				4.07	0.05						0.6	0.09
				1.25	1.15						0.39	0.48
				2.97	0.49						0.7	0.08
				0.07	1.41						0.03	0.79
				2.6	0.14						0.07	0.02
				1.65	0.11						2.17	1.29
				1.97	2.29						1.02	0.47
				0.41	0.99						1.52	0.32
				1.23	1.13						0.33	1.35
				0.98	0.9						1.48	1
				0.99	0						0.71	0.25
				0.71	2.27						0.94	0.73
				0.21	0.15						0.93	0.94
				0.34	0.36						0.99	0.48
				1.03	0.08						1.35	0.72
				1.41	1.54						0.04	0.38
				0.93	0.31						0.07	1.81
				1.05	1.12						0.53	0.69
				0.42	0.36						0.28	1.1
				1.59	0.08						0.17	0.33
				0.8	0.17						1.19	0.1
				0.15	0.53						0.98	0.46
				0.78	1.72						1.38	1.11
				1.11	0.05						1.17	0.94
				2.58	0.31						1.6	0.69
				0.72	0.83						1.19	3.25
				1.07	0.38						1.06	1.1
				1.13	0.82						0.27	1.12
				2.14	0.63						0.32	2.91
				0.07	0.53						0.15	1.2
				1.28	1						1.57	1.49
				0.94	1.65						2.25	0.5
				0.35	0.37						1.29	0.53
				0.23	0.89						0.56	0.77
				0.46	1.65						0.16	1.25
				0.12	2.62						1.55	1.01
				0.9	1.02						0.16	0.13
				0.21	0.5						0.03	0.05
				1.02	0.54						1.22	0.85
				1.55	0.64						0.76	0.05
				0.78	1.29						0.39	0.1
				2.35	1.16						0.51	0.02
				0.04	1.82						0	0.69
				1.48	1.52						0.75	1.15
				0.29	0.93						0.25	0.2
				1.25	0.1						0.53	0.76
				0.35	0.97						0.32	0.6
				1.43	1.16						0.34	0.7
				0.91	0.36						0.49	0.6
				1.36	1.94						0.63	0.29
				1.95	0.59						0.05	0.14
				0.47	0.99						0.43	0.05
				0.46	0.1						1.08	0.05
				2.44	0.67						0.41	0.93
				1.37	0.44						0.12	1.3
				0.83	1.37						1.12	0.73
				2.12	0.36						1.27	2.89
				1.14	2.3						0.39	0.36
				1.46	1.08						0.47	3.13
				1.72	0.81						0.29	1.9
				1.15	0.15						0.83	0.34
				0.44	2.09						0.12	1.43
				0.68	1.26						0.72	1.23
				0.74	0.19						0.24	0.18
				0.68	0.89						0.05	0.67
				1.44	1.25						0.65	1.37
				0.91	0.44						1.15	0.36
				0.2	1.52						0.74	1.53
				2.33	0.05						1.2	1.58
				1.21	1.02						2.31	0.21
				3.24	0.89						1.21	0.24
				1.86	0.45						0.88	1.02
				2.41	0.13						0.18	1.91
				0.55	0.99						1.4	2.16
				0.4	0.45						0.79	1.06
				0.05	1.19						0.43	1.26
				0.37	0.06						0.79	1.14
				1.74	0.17						0.05	0.41
				0	1.16						0.21	0.31
				0.64	1.03						0.66	0.95
				0.06	1						0.19	0.4
				1.34	0.7						2.72	1.27
				2.01	0.94						0.9	1.43
				0.89	0.57						0.03	1.21
				1.75	1.23						0.42	0.42
				1.21	0.41						0.37	1.2
				0.29	1.03						1.41	0.38
				2.54	0.98						0.1	1.46
				1.33	0.56						1.25	0.5
				0.29	0.37						0.89	0.44
				2.12	1.28						0.22	1.16
				1.88	0.37						0.07	0.08
				0.44	1.16						0.13	0.04
				1.09	0.22						0.95	0.34
				1.33	0.64						0.61	0.58
				1.65	0.31						1.08	0.82
				1.73	1.36						0.71	0.44
				2.38	1.18						0.61	0.33
				1.37	0.45						1.17	0.51
				0.24	0.45						0.03	1.51
				1.68	0.98						0.16	0.5
				0.04	1.26						1.26	0.46
				0.04	1.38						0.65	1.26
				1.25	0.13						1.89	0.73
				5.22	0.77						1.36	1.09
				0.11	0.64						1.14	0.61
				0.08	0.55						0.11	0.66
				0.64	1.17						0.58	1.06
				2.2	0.9						0.58	1.17
				1.17	1.44						0.63	0.35
				0	0.02						0.5	0.98
				1.87	0.22						0.56	0.18
				0.04	1.94						0.22	0.2
				0.7	2.38						1.19	0.01
				1.33	0.01						0.04	1.64
				4.31	0.05						0.51	1.66
				0.69	0.35						0.31	0.05
				0.02	1.67						0.51	0.11
				2.68	0.43						0.64	0.38
				0.04	0.11						0.59	0.7
				0.54	0.33						0.37	0.95
				2.07	0.54						1.61	0.6
				0.3	0.29						1.72	0.1
				1.2	3.01						0.47	0.08
				1.02	0.45						0.44	0.84
				0.12	1.42						0.42	0.7
				0.04	3.6						0.01	0.75
				1.22	2.55						1.13	1.12
				0.2	0.05						0.86	0.08
				3.06	1.35						1.35	0.5
				0.03	0.68						1.4	1.2
				0.24	0.53						0.12	0.18
				0.01	0.09						1.89	0.11
				3.31	0.81						0.45	1.45
				1.3	0.25						0.51	0.32
				3.28	2.95						0.29	0.33
				0.59	0.8						0.5	0.57
				2.98	2.33						0.53	0.98
				0.83	0.73						0.51	0.27
				0.58	0.27						0	0.66
				0.76	0.37						1.27	1.16
				1.68	1.72						0.41	0.07
				2.68	1.23						0.96	1.05
				2.46	0						0.29	0.4
				2.4	0.05						0.76	1.12
				2.58	0.65						0.62	0.35
				3.6	1.83						0.51	0.39
				0.77	0.21						2.02	0.47
				3.13	1.99						0.23	0.58
				3.05	0.38						0.88	0.37
				2.09	1.38						0.26	0.94
				1.14	3.8						1.36	0.01
				0.09	1.06						0.1	0.76
				1.76	0.2						0.41	2.64
				0.48	0.88						0.44	0.5
				1.92	1.35						0.91	1.02
				0.33	3.72						1.06	0.35
				0.11	0.05						1.03	0.43
				3.01	0.43						2.24	0.2
				3.98	1.01						0.84	2.05
				1.55	0.45						0.08	0.59
				4.1	0.36						0.95	0.14
				0	0.45						0.05	0.11
				0.97	0.24						0.54	0.77
				0.51	0.19						1.17	1.15
				1.17	0.02						1.66	1.1
				0.13	0.13						0.36	0.59
				4.92	4.94						0.52	0.15
				1.97	0.01						1.24	0.38
				1.69	0.05						0.72	1.8
				1.38	0.1						0.39	2.75
				0.86	0.79						0.39	0.32
				1.03	0.14						0.76	0.7
				0.73	2.25						0.27	0.34
				3.38	3.17						2.35	0.55
				0.16	0.98						0.51	2.13
				1.42	0.18						1.46	0.22
				1.35	0.49						0.01	0.48
				1.79	0.24						0.39	1.94
				0.27	0.84						0.04	1.69
				1.75	1.04						0.23	0.37
				1.86	2.26						0.28	0.35
				2.13	1						1.25	0.12
				1.51	0.49						2.29	0.02
				0.81	0.45						0.51	0.67
				1.34	0						0.27	0.54
				1.27	0.41						0.94	1.92
				1.05	0.22						1.11	1.03
				1.28	0.94						0.84	2.5
				1.15	0.79						0.94	1.12
				1.47	1.29						1.19	1.49
				0.71	0.07						0.07	1.84
				1.01	2.49						0.05	2.86
				0.35	0.68						0.4	1.19
				2.92	3.21						0.47	1.06
				1.23	4.29						0.8	1.17
				2.6	0.8						1.28	1.58
				1.07	0.07						0.93	0.25
				2.68	0.11						0.91	1.83
				1.22	0.43						1.03	4.81
				1.06	0.23						1.75	1.31
				1.05	0.01						0.05	0.53
				1.67	0.26						0.58	0.57
				0.71	0.9						0.13	0.21
				0.69	1.11						0.07	0.76
				2.5	2.51						1.35	0.11
				2.95	2.79						1.34	1.75
				1.51	0.24						0.01	2.69
				1.61	0.26						0.63	0.07
				1.15	2.92						0.13	3.03
				0.82	0.34						0.04	0.44
				0.8	0.42						1.22	0.46
				0.9	0.46						0.49	1.4
				1.83	0.84						0.37	0.91
				1.83	1.46						1.09	1.5
				1.48	0.65						0.32	0.76
				0.99	1.34						2.01	0.79
				1.08	1.32						0.54	0.75
				3.26	0.47						0.05	0.05
				1.26	0.21						0.19	0.62
				0.64	0.2						0.03	0.59
				2.28	2.17						0.39	1.37
				1.93	0.08						0.91	1
				1.56	1.16						0.17	0.85
				1.1	1.03						1.44	0.91
				2.3	0.01						0.16	0.08
				0.89	0.43						0.09	1.47
				0.92	0.46						0.11	2.12
				0.09	1.5						0.23	0.04
				0.03	0.39						0.48	0.65
				0.92	0.8						1.39	1.6
				1.34	1.73						1.07	1.09
				0.46	1.7						0.68	2.64
				1.85	1.32						0.2	1.38
				0.9	0.76						0.11	1.51
				1.01	0.42						0.76	0.41
				0.47	0.67						0.99	3.77
				2.03	0.02						0.84	0.36
				2.39	2.98						1.5	1.54
				0.7	1.37						1.25	1.04
				0.46	0.3						0.02	0.67
				0.25	0.28						0.83	1.25
				1.89	0.34						1.4	0.52
				0.97	0.51						0.32	0.01
				0.23	1.21						1.24	0.01
				0.54	0.57						0.05	2.14
				0.29	0.26						0.02	0.71
				2.66	0.34						0.22	0.34
				0.75	0.78						0	0.81
				2.42	0.81						0.56	1.72
				1.04	0.13						1.29	0.47
				0.44	1.02						0.63	0.16
				0.09	0						0.9	0.24
				0.85	0.48						0.04	0.37
				2.38	1.46						0.11	0.13
				0.75	0.41						0.45	0.36
				0.36	0.48						0.86	1.54
				2.32	0.4						2.03	2.11
				0.87	0.51						1.98	0.52
				1.17	0.57						0.75	0.26
				1.73	1.07						0.05	2.44
				0.41	0.4						3.25	1.24
				0.55	0.24						0.08	0.33
				0.05	0.3						2	0.82
				0.22	0.44						0.88	0.28
				0.01	0.25						1.22	0.04
				0.26	0.37						1.78	1.37
				0.8	0.16						0.5	1.06
				1.12	2.52						0.82	1.3
				0.07	0.36						0.37	0.54
				0.8	0.93						0.58	3.27
				3.78	1.16						1.06	1.36
				0.76	0.13						1.81	0.88
				1.02	1.5						1.46	0.67
				0.23	0.41						0.93	0.08
				0.06	3.22						0.22	1.09
				0.93	0.04						4.26	3.21
				0.8	0.61						0.34	0.11
				0.19	0.74						2.54	1.09
				1.8	0.35						0.37	0.57
				1.32	1.15						0.18	0.32
				0.1	0.37						0.38	0.44
				2.7	1.01						1.15	1.28
				0.88	0.17						0.44	0.49
				0.17	2.39						1.1	1.91
				0.24	0.34						1.43	0.01
				0.4	0.84						0.67	0.26
				1.53	0.52						1.27	1.15
				0.9	0.04						0.04	0.62
				1	1.27						0.13	1.25
				3.44	2.32						1.44	0.5
				3.36	0.71						0.37	0.59
				2.85	1.46						0.34	0.17
				0.34	1.83						0.05	1.91
				1.27	0.78						0.99	0.26
				2.3	2.64						0.57	0.9
				2.58	0.62						0.07	0.67
				0.05	0.28						1.56	0.7
				0.39	2.96						0.32	1.83
				1.64	0.78						1.96	1.63
				0.19	0.49						0.7	0.84
				0.39	1.52						1.03	0.92
				0.22	1.17						0.05	1.65
				0.37	0.36						0.69	0.97
				0.5	0.12						0.25	0.56
				2.81	1.51						0.37	0.39
				0.17	1.08						1.1	0.37
				1.63	0.54						0.76	0.19
				0.5	0.2						0.03	0.11
				0.8	0.77						0.51	0.41
				1.95	0.61						0.27	0.37
				1.13	1.29						0.34	0.15
				1.45	0.01						2.75	0.67
				0.58	0.35						0.14	0.29
				1.11	2.57						0.3	1.08
				1.07	2.24						0.28	1.95
				0.36	0.5						1.49	0.4
				1.63	1						3.18	0.38
				0.88	0.35						0.37	0.03
				1.28	2.02						0.41	0.41
				0.47	0.93						2.14	0.38
				0.49	0.68						0.4	1.27
				0.64	0.68						0.35	0.67
				1.51	1						0.55	0.59
				0	1.22						0.04	0.28
				2.82	3.27						1.5	0.04
				3.12	0.16						0.02	0.08
				1.8	0.26						0.39	0.18
				1.8	0.39						3.62	0.84
				2.31	2.54						0.66	1.88
				3.1	2.94						1.39	1.22
				3.29	0.34						0.04	0.14
				0.94	1.42						0.13	0.17
				2.43	0.49						1.46	0.03
				3.48	0.24						2.19	0.44
				2.49	0.85						3.71	0
				3.09	0.46						1.23	0.13
				3.01	0.77						0.84	0.63
				1.95	1.63						1.46	0.44
				3.1	0.79						0.05	0.15
				0.27	0.95						0.12	0.71
				0.06	0.71						0.91	0.31
				2.31	0.63						0.45	0.4
				1.56	0.22						0.21	1.62
				2.05	1						0.74	0.56
				1.33	1.47						0.85	0.68
				2.56	4.64						1.69	0.32
				0.02	0.74						0.98	0.5
				2.4	0.38						1.16	0.03
				2.59	1.82						0.24	0.11
				1.23	0.74						0.49	2.57
				0.62	1.43						0.36	1.51
				0.26	2.33						1.09	0.41
				1.74	1.31						1.92	1.42
				1.99	0.34						0	1.06
				1.24	0.64						1.35	0.25
				3.41	0.13						1.39	1.44
				0.03	1.11						2.31	0.56
				0.01	0.39						0.35	0.02
				2.61	0.34						0.9	0.38
				2.45	0.33						0.92	0.33
				1.72	1						1.17	0.37
				3.7	0.52						0.12	1.34
				0.63	0.76						0.37	1.42
				0.39	0.72						1.41	0.01
				1.4	0.71						0.86	0.44
				2.07	1.99						0.38	0.63
				0.33	1.15						0.5	0.12
				1.5	0.11						0.8	0.69
				4.08	0.37						0.95	0.44
				0.39	1.22						0.91	0.1
				0.03	0.89						1.68	0.31
				0.36	0.49						1.25	0.26
				1.47	1.19						0.58	1.57
				1.32	0.38						0.46	1.66
				0.87	0.33						1.68	0.62
				0.36	1.03						2.26	0
				1.3	1.62						0.8	0.95
				2.35	1.3						0.6	0.44
				1.95	1.19						0.67	0.36
				1.35	0.16						0.81	0.42
				1.85	0.68						0.88	0.51
				0.25	0.46						0.5	0.07
				2.9	0.54						3.79	0.05
				0.37	0.91						1.02	0.09
				0.74	0.82						1.85	0.38
				0.45	1.32						3.58	0.23
				0.63	0.14						6.21	0.05
				0.05	0.99						0.29	0.65
				2.73	0.32						0.68	2.84
				0.85	0.05						0.6	0.43
				0.86	1.55						0.5	0.01
				0.49	0.92						0.53	0.46
				1.75	1.44						1.42	2.79
				0.44	0.67						0.36	0.37
				2.06	0.53						0.06	0.03
				1.67	0.93						0.37	0.35
				2.32	0.64						1.81	0.14
				4.09	0.09						0.49	0.75
				0.48	0.08						0.36	0.96
				1.79	0.93						0.76	0.49
				0.99	1.06						1.06	0.62
				1.92	0.83						0.8	0.96
				0.41	0.44						0.45	1.44
				0.78	2.53						0.79	0.09
				1.37	0.11						0.05	3.49
				0.83	1.58						0.51	0
				1.58	1.41						0.84	0.43
				0.22	0.37						0.05	0.82
				1.76	0.8						0.73	1.45
				2.21	0.5						1	0.05
				0.24	2.26						0.55	0.74
				1.82	1.22						0.73	0.05
				0.9	1.05						0.67	0.54
				0.12	0.9						0.21	0.24
				1.41	3.01						0.8	1.26
				1.78	1						1.08	1.25
				1.34	1.71						0.36	0.04
				0.38	1.49						0.59	0.37
				0.79	2.11						1.66	0.4
				0.74	0.89						0.44	0.79
				0.94	0.07						0.35	0.31
				1.22	1.44						1.68	0.05
				1.93	0.69						1.25	0.93
				1.95	1.39						0.35	2.94
				1.6	1.76						0.37	2.7
				0.94	0.74						1.5	1.5
				0.29	2.42						0.53	0.77
				0.56	1.52						0.89	0.37
				0.58	1.22						0.07	0.42
				1.66	1.74						1.16	1.14
				1.03	2.01						0.47	0.09
				0.05	2.08						1.59	0.79
				1.14	1.89						3.14	0.9
				1.65	1.72						2.97	0.52
				1.02	0.51						0.05	0.73
				0.37	0.17						2.37	0.75
				1.92	1.69						0.31	0.11
				0.83	0.59						0.99	0.31
				0.25	0.56						1.73	1.23
				0.33	1.23						0.1	0.99
				0.22	0.55						1.2	0.3
				2.5	1.03						0.66	0.49
				0.07	0.32						0.35	0.13
				0.46	1.13						0.32	0.04
				1.7	2.19						0.36	0.02
				1.53	1.36						2.24	0.43
				2.94	3.66						0.01	0.38
				0.16	1.08						0.04	0.02
				0.48	0.88						0.62	0.02
				1.74	1.16						0.29	1.39
				1.25	2.74						1.71	0.1
				1.71	1.29						0.23	0.15
				0.51	0.43						0.42	0.34
				1.07	1.97						0.35	0.14
				0.5	1.86						0.37	0.42
				2.31	2.25						0.46	0.91
				2.35	2.2						1.03	0.43
				2.06	1.66						1.87	1.06
				2.05	1.17						1.04	0.25
				1.48	2.55						0.1	0.82
				1.88	0.11						0.96	1
				2.68	0.04						0.21	0.78
				1.69	0.45						0.83	1.4
				2.04	0.79						1.2	0.22
				1.46	1.51						1.88	0.86
				1.14	0.04						0.94	0.77
				1.07	2.15						0.04	0.04
				0.99	0.92						1.57	1
				1.27	1.77						0.65	0.34
				0.31	0.38						1.34	2.39
				0.48	0.1						0.25	1.94
				1.26	0.37						0.72	0.56
				0.5	1.06						0.16	0.26
				0.71	2.83						0.6	0.49
				0.42	0.95						1.8	0.12
				0.47	0.27						0.33	1.57
				0.03	1.29						0.42	0.21
				1.04	4.79						1.74	0.57
				2	0.61						0.13	0.38
				0.11	1.72						0.16	0.46
				0.25	0.53						0.08	0.44
				0.47	0.68						0.7	0.34
				0.75	1.86						1.37	0.1
				0.16	1.51						0.85	0.76
				2.67	2.91						0.17	0.48
				0.34	0.3						0.54	0.04
				0.19	3.47						0.89	1.78
				1.71	0.43						1.31	0.08
				2.48	1.11						0.84	0.04
				0.64	0.15						0.14	0.2
				0.66	2.03						0.45	0.51
				0.42	0.71						1.52	0.29
				1.89	0.33						0.06	1.85
				0.42	1.81						0.29	0.79
				2.15	1.41						0.26	1.11
				0.05	0.62						1.4	0.37
				2.6	1.61						2.65	0.23
				0.05	1.21						0.62	0.46
				2.42	1.31						0.39	0.45
				0.12	1.42						0.19	1.26
				1.26	2.08						0.46	0.04
				1	0.27						0.62	0
				0.48	0.41						0.92	0.19
				0.38	0.47						0.51	0.93
				0.49	0.43						2.71	0.3
				0.37	0.74						1.39	0.3
				0.94	1.49						0.02	0.79
				0.01	1						1.02	0.51
				0.87	1.59						0.69	0.15
				1.06	0.96						1.38	0.81
				1.43	1.37						1.13	0.66
				0.45	0.67						0.69	0.24
				0.49	0.95						0.74	0.51
				0.81	0.01						0.02	1.98
				0.77	0.13						1.27	0.86
				0.41	0.24						0.65	0.58
				0.05	2.38						0.28	0.05
				0.25	0.73						0.2	1.46
				0.06	0.59						0.67	0.43
				2.76	0.21						0.37	0.05
				0.47	3.01						0.04	0.03
				2.45	0.2						1	1.26
				0.06	0.16						0.41	0.61
				0.21	1.27						0.3	0.14
				0.56	1.02						1.16	0.03
				0.78	0.8						0.62	0.74
				0.95	1.59						1.32	1.23
				0.8	0.36						0.52	0.08
				1.41	0.99						1.85	0.32
				0.31	0.36						1.16	0.11
				1.86	1.61						0.37	1.38
				1	0.51						1.35	0.35
				0.62	1.29						0	1.13
				0.49	1.16						0.54	0.82
				2.06	2.19						1.14	3.99
				0.72	0.5						0.02	0.33
				1	1.07						0.73	0.53
				0.11	0.39						0.26	0.28
				0.59	0.43						1.13	0.84
				1.15	1.91						0.05	1.95
				0.34	1.88						0.3	2.23
				0.39	0.3						0.49	0.01
				0.76	0.38						0.22	1.57
				1.15	0.41						1.3	0.79
				1.56	0.04						1.06	0.95
				0.53	2.39						2.02	0.26
				1.03	0.38						1.45	0.89
				0.78	0.59						1.07	1.27
				0.48	0.36						0.6	0.15
				2.26	0.38						0.3	2.18
				0.5	0.62						1.04	0.56
				1.21	0.79						0.54	0.4
				4.32	0.3						0.53	0.07
				0	1.06						2.06	1.04
				1.71	0.38						1.4	0.08
				1.88	1.6						0.4	0.21
				0.22	1.03						0.79	3.14
				2.76	0.84						1.05	0.04
				0.13	1.09						1.11	0.6
				0.38	0.34						0.64	0.29
				0.14	0.73						0.31	0.15
				0.97	0.36						0.01	0.05
				0.15	0.5						0.37	0.09
				0.04	0.19						0.26	0.06
				2.07	0.72						0	0.05
				0.05	0.78						1.17	0.82
				0.49	1.73						0.59	0.29
				0.28	0.1						0.05	1.16
				1.63	0.97						0	0.1
				0.18	0.37						1.43	1.42
				0.35	1.77						0.63	0.52
				0.49	0.3						2.07	0.05
				0.8	0.05						0.91	0.98
				1.04	2.58						1.29	0.54
				0.43	0.84						1.56	0.34
				0.43	0.46						0.4	3.61
				2.57	1.27						0.9	0.95
				0.96	0.23						0.55	0.19
				0.72	0.38						0.14	0.08
				0.94	0						0.63	0.28
				0.56	2.2						0.96	0.04
				0.49	2.01						0.12	0.98
				1.3	1.05						0.29	2.8
				0.63	1.74						0.48	0.29
				0.79	0.95						1.3	0.62
				1.79	0.97						0.35	0.39
				0.11	4.71						0	0.16
				0.77	5.18						0.27	0.39
				1.01	1.58						0.3	0.46
				0.28	1.51						0.03	4.08
				0.27	0.49						1.13	0.04
				1.76	0.55						0.39	0.37
				2.78	3.21						0.47	0.56
				2.22	0.33						0.89	0.92
				1.3	1.01						1.34	0.24
				1.56	0.53						3.21	1.71
				0.48	0.37						0.78	1.78
				0.64	0.3						0.37	0.39
				0.49	0.34						0.46	0.92
				2.15	1.66						0.65	1.14
				0.32	2.11						0.7	1.16
				2.04	0.26						1.08	0.82
				0.38	2.31						0.41	0.68
				1.33	2.5						0.09	0.47
				1.72	0.73						1.32	0.43
				0.65	0.47						1.97	0.39
				1.25	4.36						0.56	0.64
				0.96	0.11						0.42	0.64
				0.23	0.5						0.07	0.78
				1.06	0.43						1.24	0.79
				0.8	0.22						0.05	0.87
				0.21	0						0.95	0.33
				1.28	3.2						0.1	1.44
				1.34	2.64						0.18	0.27
				0.89	1.22						0.12	0.5
				0.63	0.09						0.08	0.6
				1.15	1.09						2.23	0.34
				1.38	0.03						1.39	1.24
				0.51	1.76						0.11	0.64
				0.68	1.21						1.14	0.51
				1.07	0.54						0.85	1.89
				1.19	0.52						0.64	0.58
				0.75	3.89						0.37	0.68
				0.55	0.04						0.46	0.78
				3.4	0.03						0.64	0.05
				0.52	0.07						0.67	0.34
				0.45	0.72						0.16	0.36
				0.95	0.38						1.43	0.53
				0.52	0.98						2.57	2.02
				2.91	1.17						0.28	0.78
				1.11	0.29						2.26	1.01
				1.84	0.21						2.65	1.04
				0.78	0.67						0.98	1.15
				0.51	1.87						2	0.4
				2.68	1.14						2.8	2.55
				1.7	0.75						1.22	1.53
				0.58	3.06						2.67	1.7
				0.03	2.64						0.22	0.61
				1.32	0.86						0.7	0.15
				0.92	2.3						0.95	0.32
				0.25	1.33						1.95	1.31
				0.69	3.04						0	0.4
				0.15	0.75						3.01	1.69
				1.63	1						1.67	1.32
				1.47	4.62						2.38	0.39
				1.15	0.38						3.04	0.83
				1.18	1.81						0.44	0.35
				0.99	2.41						1.31	0.87
				1.1	0.73						2.08	0.11
				1.03	0.1						0.57	1.09
				0.91	2.58						1.48	0.31
				0.46	0.49						1.1	1.91
				0.24	1.05						4.03	0.38
				1.14	4.01						0.3	1.61
				0.82	0.6						0.54	0.93
				1.13	0.31						0.8	1.59
				0.13	0.83						0.95	0.33
				0.82	0.13						1.3	1.41
				1.12	0.5						2.39	2.17
				2.18	0.7						2.12	0.73
				1.02	0.84						2.45	0.86
				0.99	0.45						0.36	1.3
				0.68	0.35						1.34	2.82
				0.42	0.62						0.5	0.39
				0.77	0.34						0.3	1.69
				0.88	1.89						0.07	0.23
				1.76	1.39						0.03	0.22
				0.83	0.63						1.72	0.03
				0.48	0.84						1.11	1.34
				0.34	0.42						1.81	1.03
				0.17	0.34						1.02	1.31
				0.14	0.78						0.62	0.87
				1.46	0.49						1.36	0.05
				1.48	0.79						2.39	0.48
				0.19	0.29						1.36	0.91
				1.26	0.68						0.5	0.29
				0.5	0.28						1.39	1.27
				0.35	0.24						0.16	0.34
				1.17	1.68						0.24	1.01
				0.67	0.69						0.29	0.85
				1.09	0.53						4.35	0.02
				0.35	0.38						0.26	0.44
				0.48	0						0.78	0.86
				1.58	0.46						1.2	0.19
				0.36	0.41						1.34	0.02
				1.14	0.45						2	0.5
				0.52	1.08						0.43	0.24
				0.79	0.36						1.57	0.41
				0.83	1.29						0.38	1.67
				1.04	1.88						1.26	0.7
				0.63	0.1						0.02	0.99
				0.86	0.48						0.52	0.47
[truncated: 96,994 more rows]
