# Supplementary material for: A neurotrophin functioning with a Toll regulates structural plasticity in a dopaminergic circuit
Source: eLife. 2024 Dec 20;13:RP102222. doi: 10.7554/eLife.102222 (PMC11661795; doi:10.7554/eLife.102222)
Supplement: Figure 5—source data 3. [file elife-102222-fig5-data3.xlsx]

## Sheet: Figure 5 source data 3
Figure 5D. Over-expression of DNT-2FL in DNT-2 neurons increased synaptogenesis in PAM neurons
Data used to generate graphs in Figure 5D. See Supplementary File 2.
	SMP Dendrite							MB lobe
	Number of Syt-GCaMP6.0+ synapses in PAM neurons			Volume of syt-GCaMP6.0+ synapses in PAM neurons				Number of Syt-GCaMP6.0+ synapses in PAM neurons			Volume of syt-GCaMP6.0+ synapses in PAM neurons
Genotypes	R58E02>Syt-GCAMP6.0, DNT2>+	R58E02>Syt-GCAMP6.0, DNT2>UAS-DNT-2FL		R58E02>Syt-GCAMP6.0, DNT2>+	R58E02>Syt-GCAMP6.0, DNT2>UAS-DNT2FL		Genotypes	R58E02>Syt-GCAMP6.0, DNT2>+	R58E02>Syt-GCAMP6.0, DNT2>UAS-DNT-2FL		R58E02>Syt-GCAMP6.0, DNT2>+	R58E02>Syt-GCAMP6.0, DNT2>UAS-DNT2FL
	3765	3868		0.39	1.3			2153	2600		0.86	1.11
	2736	3386		0.12	0.89			2159	2783		0.67	0.96
	4432	3432		0.27	0.06			2371	2808		0.27	0.28
	4240	4224		0.08	0.18			2291	3091		0	0.99
	3712	3786		0.41	1.28			2534	2432		1.03	0.39
	3960	3900		0.37	0.17			2860	2903		0.39	1.26
	4397	4014		0.1	1.23			2628	2433		1.2	0.86
	3065	2855		0.36	1.38			2659	2212		0.41	0.77
	3420	3812		0.31	0.56			2624	3347		1.26	1.58
	3293	2826		0.45	1.58			2522	3301		1.02	0.85
	5656	4690		0.41	0.69			3402	3821		0.91	1.53
	5308	4700		0.36	0.17			3559	4178		1.48	0.48
	4587	5376		0.18	1.39			2645	3507		0.75	0.61
	3843	4835		0.2	1.34			2692	3720		0.92	0.23
	3557	3636		0.1	1.02			2533	3545		1.03	0.39
	4752	4272		0.36	0.96			2589	3412		0.79	1.09
	4357	5202		0.38	0.18			3139	3277		1.46	0.79
	4043	5204		0.14	1.28			2373	3400		0.4	0.03
	4029	2056		0.09	0.93			2660	3342		0.09	0.82
	3937	3535		0.01	1.1			2629	3688		1.87	0.09
	4469	3338		0.35	0.05			2687	3568		0.95	1.31
	4099	4036		0.34	0.26			2820	3637		1.37	0.79
	4144	3803		0.37	0.28			2292	2978		0.7	1.12
	4993	2642		0.35	0.09			2321	3095		0.77	1.04
		4871		0.3	1.38				3585		1.08	1.43
		5129		0.42	0.56				3794		0.58	0.01
				0.39	1.09						1	1.16
				0.5	1.22						1.16	1.1
				0.27	0.97						0.79	0.77
				0	1.03						0.63	1.09
				0.66	0.95						0.78	0.85
				0.21	1.24						1.33	0.46
				0.38	0.67						0.68	0.75
				0.41	0.59						0.63	1
				0.4	0.98						2.72	0.21
				0.39	0.62						2.55	0.97
				0.41	1.32						0.89	0.72
				0.38	0.49						0.95	0.23
				0.4	0.41						0.61	0.19
				0.42	2.83						0.36	1.28
				0.36	0.98						0.38	0.6
				0.29	0.81						0.11	1.09
				0.31	0.57						0.19	1.06
				0.7	0.8						1.68	0.28
				0.92	0.82						0.87	0.34
				1.01	0.62						0.13	1.05
				0.18	0.49						0.01	1.26
				0.12	1.99						1.37	1.23
				0.24	0.96						0.25	0.72
				0.06	3.36						0.8	0.1
				0.84	0.93						1.01	0.81
				2.11	0.85						0.89	1.18
				2.57	0.26						1.2	0.83
				0.8	1.09						0.14	1.12
				0.84	0.91						1.25	0.48
				0.52	0.28						0.49	1.65
				0.48	0.87						0.75	1.68
				2.15	0.48						1.09	0.84
				0.93	0.59						0.71	0.35
				0.33	0.54						0.78	0.93
				1.58	0.33						0.92	0.88
				0.6	0.75						0.62	0.8
				1.35	0.65						0.61	0.75
				1.1	1.32						0.42	0.73
				2.27	1.44						0.63	4.08
				0.32	0.83						0.81	1.19
				0.04	1.15						0.54	0.58
				3.16	1.03						0.24	0.46
				0.25	0.7						1.01	0.98
				0.3	1.58						0.03	2.8
				1.71	0.83						1.51	1.37
				1.93	1.29						0.71	1.13
				2.71	1.55						0.94	0.62
				0.81	0.28						1.07	0.89
				3.16	1.46						1.07	5.29
				0.91	0.68						0.96	0.65
				2.99	1.34						0.26	1.52
				0.45	1.38						0.05	1.62
				0.8	0.6						0.57	1.12
				1.22	0.26						0.44	4.65
				0.42	2.02						1.58	0.77
				1	2.32						0.77	0.52
				0	2.25						1.31	2.4
				0.14	1.57						0.78	1.19
				0.78	0.79						1.32	0.6
				0.7	0.86						0.76	1.11
				1.8	0.35						0.99	3.36
				1.6	1.01						1.03	1.13
				0.14	2.19						1.36	0.24
				0.02	1.56						0.09	1.47
				0.11	0.53						0.38	0.9
				1.36	1.72						0.96	0.58
				3.41	0.12						1.01	1.45
				0.01	2.12						1.2	0.29
				1.98	1.64						1.25	1.64
				1.41	0.32						1	0.44
				3.15	0.37						0.75	1.72
				1.52	0.86						0.72	1
				0.41	0.5						0.28	1.39
				0.11	0.61						0.94	0.92
				1.42	0.24						0.75	0.53
				0.15	1.37						0.78	0.25
				0	0.31						1.43	0.38
				0.02	1.35						0.88	1.18
				0.98	0.94						0.71	0.34
				1	3.23						0.31	0.27
				0.21	5.27						0.16	1.31
				1.64	0.83						0.31	1.85
				1.28	2.33						1.23	1.06
				0.12	0.2						0.32	0.23
				0.49	0.04						0.82	1.06
				0.04	1.58						1.65	1.22
				1.18	2.21						0	3.59
				0.41	1.37						0.13	0.46
				0.4	0.04						0.05	2.15
				1.1	0.05						0.41	0.8
				0.54	0.37						1	1.01
				0.16	3.02						2.9	0.22
				0.99	1.77						0.23	0.5
				0.16	1.28						0.75	0.33
				0.71	0.42						3.46	1.74
				0.25	0.36						0.04	0.39
				0.22	1.84						0.26	0.96
				0.64	0.9						1.27	1.02
				0.86	2.63						0.12	0.7
				0.06	0						0.14	0.37
				0.58	0.12						0.77	1.01
				0.75	0.61						1.28	0.18
				0.42	0.99						0.64	0.64
				0.63	3.35						1.16	0.47
				1.28	0.95						2.21	4.23
				1.31	0.11						0.79	0.32
				1.48	1.96						1.06	1.02
				0.59	0.09						0.85	0.84
				0.9	0.94						3.61	0.19
				0.92	1.6						1.61	0.06
				1.42	1.71						0.07	0.75
				1.3	0.36						0.97	1.12
				1.47	0.57						1.78	0.33
				0.77	1.91						1.14	0.43
				0.77	0.75						2.11	1.12
				0.95	0.01						0.73	1.16
				1.01	1.49						2.19	0.36
				1.64	0.07						0.78	3.29
				1	2.53						1.75	0.88
				0.8	2.71						0.91	0.46
				1.26	1						1.95	0.76
				1.01	0.9						1.58	3.3
				0.48	0.16						0.06	1.31
				0.97	2.17						1.6	0.72
				1.23	0.04						0.49	0.8
				0.7	1.25						0.98	1.55
				1.17	0.39						0.56	0.17
				0.63	1.02						0.65	0.87
				0.58	0.04						1.9	1.45
				0.63	2.13						0.35	0.44
				1.45	1.17						1.78	3.48
				1.03	1.17						1.69	0.74
				1.49	1.09						1.13	1.5
				0.84	0.25						1.16	0.81
				0.66	0.72						1.68	0.33
				0.67	1.11						0.58	0.94
				1.22	0.02						1.14	0.04
				1.04	3.46						1.82	1.09
				0.51	1.51						2.16	1.13
				0.59	0.85						1.97	0.47
				1.01	0.57						0.43	0.8
				0.66	0.67						0.36	2.43
				1.1	0.54						0.46	1.27
				0.73	0.06						0.76	0.49
				0.49	0.05						1.19	1.02
				0.12	0.04						0.89	0.89
				2.53	0.67						0.72	1.08
				1.29	0.12						0.64	1.36
				2.14	1.31						1.35	1.03
				1.45	0.96						2.45	1.89
				1.47	0.64						1.98	1.13
				1.65	1.94						2.14	2.79
				2.55	0.9						1.92	0.81
				2.45	1.03						2.65	0.69
				0.51	0.18						0.74	1.09
				1.12	1.53						1	1.96
				2.68	0.29						0.5	1.74
				1.42	0.29						0.3	1.79
				4.45	1.06						0.2	0.69
				2.8	1.41						0.28	1.46
				1.3	1.21						1	2.3
				0.93	0.79						0.04	0.29
				3.33	1.03						1.28	1.9
				0.27	2.12						1.55	1.75
				0.02	0.03						0.03	0.08
				2.19	0.13						1.55	1.55
				0	0.34						1.05	1.72
				3.04	1.11						0.24	1.31
				0.25	0.51						0.15	1.14
				0	0.25						2.13	1.27
				2.25	0.74						0.07	0.22
				0.13	0.51						0.63	1.54
				0.35	2.13						1.45	0.18
				3.81	0.46						1.47	1.26
				0.82	0.1						1.64	0.77
				0.04	3.07						0.73	0.42
				0.69	0.34						1.23	4.66
				1.01	0.33						1.09	0.33
				1.19	1.4						1.49	2.48
				0.34	0.1						1.46	1.6
				0.41	1.38						1.19	0.48
				0.32	1.27						1.24	0.67
				0.93	0.66						0.62	0.69
				0.98	0.88						1.21	0.05
				0.96	0.46						0.43	0.21
				0.3	0.74						0.93	2.11
				2.43	0.19						2.56	0.4
				0.52	2.79						1.4	1.14
				0.84	0.72						1.11	1.07
				1.12	0.08						1.96	2.3
				0.08	0.17						2.92	1.97
				0.49	1.27						3.95	0.83
				0.45	2.62						0.35	0.61
				0.62	1.03						1.4	0.61
				1.65	0.39						0.34	1.21
				0.48	1.21						0.7	1.1
				1.03	0						3.04	1.69
				1.33	2.78						2.05	0.9
				0.2	0.03						1.23	1.46
				1.41	0.53						1.56	1.54
				0.04	0.02						0.76	1.12
				3.08	0.26						0.74	0.72
				0.99	0.84						0.87	1.43
				0.4	2.34						0.43	2.82
				0.14	0.94						0.98	0.88
				2.17	0.05						1.17	1.04
				1.37	0.17						0.35	2.28
				0.3	0.59						0.82	0.45
				0.04	0.41						1.27	0.84
				0.44	0.69						0.24	0.66
				0.24	1.1						0.7	0.96
				1.81	0.1						1.36	0.73
				1.2	1.46						0.08	0.42
				0.05	0.48						0.81	2.65
				0.63	0.62						0.36	0.88
				1.87	0.06						0.91	1.03
				0.61	1.45						1.33	1.24
				0.53	0						0.29	0.14
				0.45	0.62						0.79	1.28
				0.93	0.24						2.82	0.92
				0.02	0						0.36	0.6
				0.04	0.8						2.14	1.28
				1.87	0.09						1.15	0.28
				1.13	1.29						0.67	0.22
				0.89	2.06						0.14	0.95
				3.01	1.63						2.08	0.31
				0.1	1.18						0.17	0.88
				0.48	0.67						2.1	0.77
				0.9	0.25						1.92	0.98
				0.8	0.85						1.31	0.25
				1.2	0.79						0.67	0.96
				1.09	0.56						0.29	1.16
				0.24	0.38						1.2	3.48
				0.1	1.57						1.35	1.17
				0.94	0.65						4.38	1.29
				1.49	1.25						1	0.92
				1.36	1.22						1.81	2.31
				1.43	0.17						0.51	0.84
				0.05	2.26						0.99	2.36
				0.56	0.61						0.43	1.06
				1.31	1.29						0.83	0.52
				2.17	1.32						5.16	1.09
				0.35	2.64						1.36	0.04
				0.51	2.76						1.19	1.08
				0.23	2.27						1.84	1.29
				0.43	1.15						2.28	0.35
				0.29	1.24						3.14	0.41
				0.12	2.04						1.26	1.65
				0.68	0.96						1.1	2.34
				0.29	0.91						0.46	0.48
				0.39	0.23						0.03	1.98
				0.76	0.61						0.94	2.38
				0.04	0.05						1.2	0.82
				1.18	1.82						1.29	1.15
				1.29	0.51						0.72	0.43
				0.96	1.08						0.89	0.61
				0.46	0.98						0.31	0.93
				0.48	0.97						2.66	0.32
				0.49	0.25						0.09	0.21
				0.55	0.47						1.4	1.01
				0.05	1.8						0.4	1.32
				0.37	9.09						4.89	1.03
				1.66	0.02						0.71	1.21
				1.1	0.24						0.12	0.66
				0.5	0.33						1.38	0.52
				0.68	0.97						0.04	0.57
				0.18	0.83						2.64	0.55
				0.36	1.61						0.6	0.72
				0.35	0.02						2.99	1.78
				0.85	0.04						0.68	0.49
				1.51	0.31						0.94	0.46
				0.4	0.27						1.12	1.29
				2.22	1						1.08	0.92
				0.19	0.38						0.55	1.21
				1.81	0.59						1.08	0.38
				0.45	0.37						1.34	0.37
				0.06	0						0.9	0.08
				2.84	1.11						1.34	1.06
				0.43	0.11						1.44	2.22
				0.39	0.42						1.32	1.2
				0.58	4.23						0.6	0.2
				0.11	0.47						2	1.82
				0.81	1.35						1.13	1.98
				0.32	1.23						0.84	0.96
				0.3	1.01						1.22	0.31
				0.48	0.84						0.83	0.61
				1.21	1.3						0.85	0.61
				0.89	0.04						0.49	0.03
				0.08	0.62						0.53	0.46
				0.05	0.35						1.28	2.7
				0.12	0.6						1.28	0.61
				1.29	0.54						1.09	1.07
				0.44	1.06						0.25	1.34
				0.45	0.17						0.29	1.07
				0.69	0.49						0.32	0.7
				1.73	2.01						2.44	0.14
				0.26	1.67						2.81	0.49
				1.87	0.42						0.12	0.81
				1.32	0.03						1.82	0.11
				0.1	3.48						0.22	0.59
				0.84	0.06						0.1	0.77
				0	1.44						2.84	0.44
				0.44	0.88						0.32	0.4
				0.49	1.05						1.55	0.05
				0	1.44						0.33	0.31
				1.03	1.68						1.04	1.91
				0.09	0.72						0.37	1.64
				1.05	3.18						0.29	1.14
				0.42	0.49						2.84	0.96
				0.05	0.65						0.6	4.15
				0.11	0.56						0	2.66
				0.86	0.77						0.27	2.6
				1.02	1.38						1.01	2.03
				0.21	0.11						0.94	0.47
				0.09	0.71						1.59	0.42
				1.66	0.45						0.78	0
				0.62	0.32						1.29	2.07
				0.65	0.74						5.94	0.52
				0.74	0.37						0	2
				2.01	1.21						1.68	0.58
				0.81	0.63						2.04	0.95
				3.1	0.49						1.29	0.97
				1.53	1.46						0.6	0.42
				1.2	0.65						1.6	1.26
				0.36	0.34						1.31	1.51
				0.09	0.21						1.16	2.17
				0.08	0.37						1.68	1.01
				0.33	0.67						0.11	1.69
				0.04	0.22						1.3	1.12
				2.5	0.33						0.29	3.31
				0.28	0.06						0.59	1.63
				0.06	0.36						1.38	0.45
				0.98	0.39						0.28	0.5
				0.45	1.18						1.08	1.36
				0.47	0.4						0.23	0.52
				0.75	0.58						0.5	0.35
				0.08	1.13						0.49	0.51
				0.06	0.99						1.63	0.64
				2.53	0.73						2.02	0.9
				1.25	0.55						0.19	0.34
				1.04	0.34						0.34	0.26
				1.31	0.38						1.15	0.76
				1.06	0.21						0.71	0.36
				1.54	0.04						3.57	1.2
				0.63	1.04						3.78	0.37
				0.03	0.02						1.39	0.06
				0.17	0.34						0.57	0.91
				1.26	0.36						1.5	1.06
				1.26	1.01						0.3	0.55
				0.4	0.04						0.17	0.29
				0.44	1.64						1.41	0.81
				1.75	1.43						1.13	1.3
				2.03	2.93						1.18	0.91
				1.25	0.67						1.51	1.68
				1.77	1.27						1.92	0.56
				1.72	0.4						0.14	0.84
				1.06	1.24						1.3	1.23
				0.81	1.08						0.39	1.53
				0.49	0.25						0.07	1.51
				1.44	0.28						0.52	2.08
				0.29	0.44						0.41	0.75
				1.59	0.48						1.8	2
				1.38	1.69						1.35	2.32
				3.37	0.17						0.89	1.25
				0.55	1.21						2.23	1.67
				0.14	0.22						0.52	0.11
				1.87	0.03						0.35	1.03
				0.42	0.05						0.02	1.44
				1.31	0.46						0	1.68
				0.01	0.03						1.13	0.81
				0.69	0.97						1.76	1.55
				0.92	0.35						2.03	0.65
				0.44	1.5						1.47	0.84
				0.71	0.59						1.1	0.04
				0.62	0.72						0.03	0.43
				0.58	0.81						0.65	0.51
				0.45	0.03						2.8	0.4
				1.33	1.97						1.46	1.35
				1	0.34						0.71	0.87
				0.56	1.98						0.37	0.24
				0.5	3.99						1.45	1.24
				2.01	0.39						1.43	0.82
				0.33	0.63						0.02	1.13
				0.98	4.96						0.04	0.01
				1.39	0.72						0.74	0.2
				0.02	1						4.99	1.05
				0.45	1.62						3.94	0.91
				0.14	0.68						0.41	0.74
				0.07	0.07						3.54	1.24
				1.88	0						0.72	1.03
				0.53	1.68						2.84	0.78
				2.57	0.19						0.02	3
				0.82	0.85						0.91	0.68
				0.97	1.74						0.21	0.65
				1.14	0.97						0.45	1.15
				0.91	1.46						3.32	1.61
				0.73	1.31						0.74	0.04
				0.97	0.15						0.87	2.51
				0.85	1.38						1.2	0.96
				1.01	0.74						1.5	0.83
				0.81	0.89						0.19	0.6
				1.35	0.48						0.01	0.1
				0.45	0.27						0.87	0.41
				0.46	0.56						1.88	1.33
				0.44	0.09						1.07	0.68
				1.6	0.55						2.35	0.55
				0.64	0.29						0.11	0.67
				0.97	0.42						0.8	0.54
				0.76	0.44						3.78	0.96
				1.17	0.82						2.23	0.57
				1.16	0.88						1.12	1.16
				0.86	0.9						1.19	0.47
				0.35	0.16						0.53	0.82
				0.58	0.04						0.38	0.35
				1.58	0.03						0.24	0.34
				1.08	1.43						0.34	1.11
				0.74	0.6						1.68	1.04
				0.3	1.12						1.02	0.38
				0.53	1.26						0.5	1.27
				0.89	0.69						0.5	0.56
				1.11	0.37						0.56	1.5
				1.14	0.49						3.34	1.72
				0.49	0.32						2.54	3.37
				0.58	0.27						2.59	0
				0.99	1.69						4.45	0.5
				0.54	0.08						2.81	1.99
				0.81	0.31						0.68	0.9
				0.64	3.7						1.97	0.06
				0.15	0.09						1.06	1.98
				2.17	1.58						0.4	1.39
				0.64	0.25						0	0.19
				0.8	0.56						1.01	1.22
				2.27	2.67						0.57	0.1
				1.64	1.75						0.91	0.74
				4.03	1.25						0.17	1.32
				2.94	0.77						0.11	1.07
				0.61	0.59						0.36	1.43
				0.62	1.16						0.34	0.51
				1.8	0.23						0.52	1.25
				0.8	0.31						0.89	0
				1.19	1.39						2.97	1.13
				1.94	1.03						0.27	1.01
				2.25	1.81						0.46	0.68
				0.52	0						0.21	0.47
				1.65	0.13						0.26	1.09
				0.2	0.06						0.94	0.1
				1.71	2.1						2.1	0.05
				0.14	0.06						0.82	1.36
				0.5	2.17						0.29	0.39
				0.08	0.17						0.42	0.08
				0.36	0.7						0.1	1.95
				0.47	3.03						1.1	0.86
				0.4	0.21						0.13	0.29
				2.76	1.38						0.77	2.64
				2.13	1.69						0.54	0.31
				0.71	0.36						0.3	0.03
				0.48	3.64						0.15	0.86
				0.46	2.09						1.59	1.38
				1.15	0.05						0.3	1.16
				0.21	3.02						4.03	0.39
				0.31	1.03						1.62	0.92
				2.36	0.2						1.41	0.27
				2.03	0.94						0.62	1.33
				0.14	0.86						1.51	0.14
				1.67	0.22						1.16	0.62
				0.46	1.38						0.12	0.64
				0.21	1.06						2.65	0.44
				0.05	1.32						0.84	0.05
				3.1	1.35						0.76	0.54
				0.04	0.51						0.76	0.71
				0.43	0.7						1.11	0.64
				0.01	1.94						1.35	1.1
				0.99	0.23						0.81	0.18
				1.04	0.45						0.58	0.29
				0.25	0.56						1.21	0.47
				1.65	0.04						0.03	0.33
				0.3	0.51						0	3.21
				2.16	1.79						0.32	1.05
				0.12	0						0.05	0.05
				0.23	0.87						0.05	0.51
				1.2	0.18						0.64	1.14
				0.86	1.51						0.06	0.32
				0	0.38						0.72	1.55
				2.18	0.15						0.39	1.27
				0.51	0.85						1.65	9.15
				2.25	0.13						0.49	0.77
				2.24	0.79						2.61	0.94
				0.4	0.3						1.71	0.6
				3.96	0.75						1.24	0.82
				0	0.38						0.47	3.6
				1.44	0.53						0.38	1.31
				1.23	0.11						0.5	3.24
				1.48	0.46						0.84	0.76
				0.25	0.34						0.27	1.31
				0.32	0.35						0.74	0.25
				0.31	4.58						2.14	1.47
				0.11	0.48						0.9	0.02
				1.4	1.01						0.66	0
				1.21	2.63						1.05	0.33
				3.27	0.31						0.05	0.44
				0.49	0.05						3.11	0.08
				0.22	0.97						0.4	0.51
				0.68	1.79						0.55	0.55
				0.54	1.56						1.51	0.04
				0.68	0.03						0.62	0.23
				0.81	0.65						1.71	0.05
				0.56	1.33						3.06	0.59
				0.54	1.42						0.05	2.08
				0.58	0.05						0.05	0.09
				1.65	0.44						0.06	1.12
				1.07	0.5						0.78	0.04
				1.79	0.78						0.86	0.87
				0.82	1.63						0.75	0.88
				1.83	0.88						0.1	0.44
				0.68	0.16						0.94	1.45
				0.65	2.88						0.89	0.66
				0.53	0.71						2.28	1.17
				0.98	0.05						0.15	0.33
				0.96	0						0.06	0.5
				0.21	0.12						0.47	0.93
				0.8	0.05						1.21	1.91
				0.7	0.06						0.68	0.46
				0.68	1.26						1.21	0.71
				0.88	0.39						0.3	0.87
				1.18	0.13						0.33	0.26
				0.97	1.57						0.33	0.37
				1.27	0						0.41	0.09
				0.96	0.28						0.46	2.14
				0.55	1.13						1.43	0.12
				0.91	0.01						0.43	1.05
				0.83	1.4						1.83	0.44
				1.17	4.17						0.48	0.69
				1.31	1.33						0.39	0.75
				1	0.51						0.21	0.05
				0.89	0.51						0.18	0.7
				1.81	0.57						0.31	3.18
				0.11	1.02						0.09	0.86
				0.54	0.31						1.29	0.48
				0.71	0.05						1.34	0.47
				0.45	0.25						1.33	5.72
				1.02	1.01						0.47	0.09
				1.34	0.7						1.76	1.27
				0.6	0.97						1.02	0.23
				1.72	0.24						0.24	1.5
				0.95	1.11						0.55	3
				0.9	0.12						0.44	2.02
				0.55	0.65						0.62	1.32
				0.58	2.04						1.21	1.39
				0.55	0.53						0.62	1.29
				0.87	0.18						1.96	1.53
				2.3	1.3						1.27	0.58
				0.34	0.71						0.03	0.15
				0.94	0.03						1	0.98
				1.12	1.6						0.95	0.38
				0.58	0.62						2.72	1.32
				0.41	0.69						0.2	0.66
				0.51	0.1						0.39	0.52
				0.72	0.26						0	0.08
				0.02	0.15						0.43	0.24
				0.26	0.05						0.1	0.48
				0.55	1.27						1.08	0.1
				0.05	0.79						0.23	0.13
				1.05	0.12						0.25	1.69
				0.95	0.08						0.91	0.58
				0.12	0.52						0.37	1.07
				0.97	0.57						0.57	0.28
				0.73	1						1.16	0.61
				2.78	0.3						0.15	0.18
				1.9	0.04						1.81	0.4
				0.19	0.26						0.84	1.74
				0.98	2.13						0.26	1.05
				0.72	0.89						0.05	0.03
				0.73	0.09						1.54	0.92
				0.61	0.06						2.71	0.8
				0.75	0.25						1.35	0.7
				0.66	0.66						1.39	2.27
				0.43	0.52						1.4	0.53
				1.38	0.4						1.46	0.66
				1.49	1.21						0.04	2.23
				1.12	0.13						2.83	2.87
				0.69	5.3						0.92	1.37
				0.45	0.58						0.92	0.52
				1.37	2.18						0.25	1.4
				0.07	0.45						0.23	1.04
				0.43	0.05						1.41	1.25
				0.86	0.13						0.48	1.79
				2.13	1.46						0.16	1
				0.25	0.43						0.81	2.1
				1.78	1.17						0.05	0.92
				1.12	0.65						0.91	0.76
				0.7	0.51						0.39	0.69
				0.72	0.86						0.12	0.78
				0.86	0.21						0.14	2.75
				1.46	0.77						1.1	0.86
				0.43	0.7						0.65	0.26
				0.84	0.02						0.69	0.88
				0.34	0.04						0.49	0.06
				1.04	0.35						1.15	1.36
				1.37	0.05						0.35	0.11
				0.55	0.83						0.61	0.61
				0.74	1.57						1.14	0.74
				0.78	1.02						0.91	0.12
				0.72	2.06						3.95	1.55
				0.59	0.28						0.52	1.42
				0.88	0.72						0.32	0.88
				0.68	0.04						1.4	0.23
				0.64	0.32						3.69	0.67
				0.47	1.28						1.62	0.24
				0.9	0.35						2.41	0.04
				1.39	2.1						0.41	0.05
				1.12	1.47						0.85	0.03
				0.6	0.37						2.13	0.22
				0.65	0.6						0.2	0.68
				0.68	0.04						0.11	0.3
				1.17	0.87						0.25	0.36
				0.2	1.45						1.28	0.37
				1.04	1						1.34	0.91
				1.33	0.64						0.42	1.02
				1.43	0.5						0.48	0
				0.62	0.01						0.15	0.42
				0.74	0.09						0.07	0
				0.73	0.18						1.59	0.99
				0.63	2.24						2.21	0.57
				1	1.61						0.06	0.15
				0.65	0.05						0.5	0.49
				0.48	0.11						0.19	0.41
				0.56	0.63						0.1	2.39
				0.88	0.11						0.69	2.04
				0.44	0.37						0.01	0.45
				0.46	0.34						0.89	1.25
				0.82	0.86						0.14	0.47
				0.91	1.47						0.02	1.52
				0.72	1.63						0.29	0.32
				0.54	0.51						1.72	1
				0.61	1.31						0.24	0.34
				0.53	2.09						0.37	1.23
				0.97	1.4						1.06	0.33
				0.85	1.89						0.24	0.97
				0.54	0.43						1.06	0.41
				0.87	0.03						0.93	0.8
				1.02	1.69						6.61	0.03
				0.81	1.34						0.25	1.61
				0.66	0.02						0.52	3.74
				0.97	0.01						1.1	0
				0.44	0.98						0.22	0
				1.43	0.71						0.49	0.69
				0.91	0.1						0.37	0.91
				0.84	0.84						1.12	1.33
				1.08	0.38						0.18	6.17
				0.63	0.07						1.21	1.64
				0.53	0.07						1.64	0.9
				1.14	0.08						0.29	0.56
				0.68	0.51						0.15	0.47
				1.09	1.94						1.12	0.05
				1.38	0.61						1.3	0.09
				0.58	1.15						0.31	1.42
				1.32	0.14						0.38	2.42
				0.87	0.21						1	0.16
				0.92	0.22						1.03	2.84
				1.37	0.12						0.34	0.61
				0.58	0.56						1.09	0.67
				0.74	0.52						0.51	1.66
				1.55	0.04						0.97	1.02
				0.74	1.19						0.77	1
				0.55	1.2						0.03	1.92
				1.07	0.37						0.39	2.24
				0.59	1.39						1.09	1.28
				0.76	2.3						0.51	0.49
				0.71	0.85						0.04	0
				0.6	0.74						0.91	0.83
				1.38	0.66						1.81	2.65
				0.71	0.2						1.11	0.12
				0.89	0.35						0.13	1.33
				0.67	0.22						0.27	1.25
				0.95	0.13						0.29	0.49
				0.1	1.34						0.36	0.95
				1.67	1.18						0.36	0.74
				0.71	0.29						0.72	0.89
				1.12	0.38						0.43	0.39
				0.69	0.06						0	0.82
				1.27	0.06						0.05	0.63
				2.43	1.92						0.1	3.02
				0.1	0.11						0.54	0.97
				0.71	0.9						0.24	1.6
				0.75	0.35						0.03	1.02
				0.75	0.46						0.77	0.69
				0.63	1.14						0.35	1.33
				2.26	0.01						1.5	0.39
				1.08	0.03						0.82	0.31
				1.44	0.85						0.69	0.03
				0.89	1.03						0.82	0.03
				0.84	1.19						0.23	0.39
				1.71	0.18						1.84	0.55
				2.84	0.42						0.56	0.01
				2.4	0.18						0.86	0.14
				0.57	0.69						1.5	0.41
				2.92	0.06						0.66	0.54
				2.9	0.73						2.86	0.34
				3.84	0.42						1.94	1.88
				1.36	0						0.77	0.46
				2.88	0.41						0.41	0.46
				1.2	1.24						1.34	4.82
				0.51	0.38						0.33	0.66
				1.16	0.38						0.09	0.41
				1.94	0.8						3.03	1.57
				2.46	0.83						0.17	0.33
				1.02	0.3						0.46	0
				0.07	0.48						0.33	1.54
				1.22	1.52						0.58	0.46
				0.52	0.28						0.4	2.3
				2.48	1.26						0.06	0.66
				0.04	0.81						0.13	0.11
				2.64	0.37						1.03	0.05
				1.28	1						0.06	0.19
				2.07	0.2						0.47	0.45
				0.03	0.48						1.24	2.03
				0.68	0.09						0.34	0.07
				0.68	0.16						0.54	0.89
				0.91	1.57						0.33	0.42
				1.9	0.18						0.08	1.09
				0.59	0.39						3.28	0.07
				0.42	0.1						5.31	0.26
				2.51	0.33						0.35	2.9
				1.64	0.32						2.39	0.84
				0.08	0.27						0.43	1.16
				0.53	2.52						0.95	1.3
				0	1.88						0.01	1.72
				0	1.08						1.16	0.22
				2.07	0.51						0.44	0.02
				0.79	0.17						0.41	0.12
				0.99	0.61						1.24	0.16
				0.42	1.05						0.26	1.07
				3.78	0.45						0.83	1.92
				0.06	0.39						1.83	0.39
				0.12	0.64						0.05	0.94
				0.06	0.35						2.47	0.44
				0.51	0.04						1.73	0.24
				1.73	0.02						0.05	1.91
				0.19	1.92						0.45	0.47
				1.25	0.53						0.47	2.85
				1.9	0.2						0.35	1.5
				1.65	0.26						0.36	0.67
				1.42	0.43						0.52	1.01
				0.98	1.87						0.59	3.05
				0.1	0.67						0.04	2.25
				1.31	1.89						0.51	0.52
				0.29	1.43						0.81	0.91
				1.95	1						0.14	0.29
				0.04	0.34						2.4	1.14
				1.82	0.97						1.85	0.48
				0.04	1.43						0.64	0.06
				0	0.12						0.9	0.05
				0.34	0.57						0.14	0.17
				0.64	0.05						1.05	0.08
				0	0.1						1.55	0.08
				0.86	0						2.73	0.05
				0.34	0.4						0.47	1.09
				0.3	0.33						1.44	0.25
				1.69	0						0.82	0.05
				2.69	0.68						2.7	0.22
				1.2	0.31						2.33	1.19
				1.77	1.8						0.26	0.49
				2.04	0.87						0.04	0.27
				0.07	0.63						0.33	0.5
				0.03	0.17						2.09	0.47
				0.62	0.99						0.13	0.32
				0.16	1.51						0.05	0.51
				0.93	3.41						1.18	0.36
				0.06	1.01						1.74	0.63
				0.38	0.01						0.53	0.09
				0.03	0.88						0.29	2.08
				0.09	2.55						0.1	0.25
				0.59	1.72						0.18	2.95
				0.07	0.92						0.66	0.05
				1.12	0.33						0.05	2.31
				0.28	0.13						1.39	0.62
				0.87	0.46						0.46	0.71
				0	0.99						0.04	1.5
				0.26	0.18						0.1	0.82
				0.78	1.93						0.54	0.69
				1.1	0.27						0.42	0.18
				1.1	0.2						5.93	6.28
				1.19	0.89						0.55	1.27
				0.04	0.12						2.1	1.34
				0.55	0.37						0.33	1.11
				0.13	0.15						1.03	2.07
				0.09	0.87						1.29	3.92
				0.78	0.4						0.77	2.08
				0.11	0.98						0.3	0.08
				1.09	0.07						0.65	0.3
				0	1.04						1.32	0.97
				0.03	0.81						0.38	0.64
				0.03	0.12						0.21	1.23
				0.39	1.26						0.01	0.67
				0.04	0.08						0.11	0.2
				0.17	6.03						0.04	0.38
				1.17	0.94						0.45	0.35
				0.94	1.91						1.13	0.51
				0.35	1.24						1.23	1.18
				0.38	1.47						2.4	0.19
				0.66	0.68						0.44	0.32
				1.69	1.57						0.09	0.4
				0.07	0.35						0.04	1.07
				0.18	1.41						0.44	0.34
				0.47	0.61						0.09	1.15
				1.26	2.78						0.08	0.29
				0.33	1.18						0.84	0.95
				1.16	1.46						0.05	0.65
				0.18	1.14						0.51	0.73
				0.4	0.34						0.36	0.4
				0.86	2.3						1.11	0.61
				0.17	0.1						1.25	0.85
				2.14	1.34						0.63	0.98
				0.9	1.27						0.23	1.09
				0.08	1.14						0.36	2.93
				1.04	0.35						0.23	1.37
				0.75	0.33						0.23	1.73
				0.19	2.14						0.38	0.95
				1.56	0.57						0.26	0.62
				0.35	0.69						0.77	0.07
				0.33	1.24						0.3	0.24
				0.37	2.21						0.34	0.58
				0.36	1.36						0.01	0.38
				0.02	1.36						0.07	0.45
				0	0.66						0.18	1.18
				0.24	1.35						1.41	0.04
				0.01	0.12						0.19	0.39
				0.49	2.58						0.06	0.49
				0.6	0.46						0.03	0.22
				0.13	1.54						0.32	0.29
				0.66	1.64						3.05	0.85
				0.05	3.07						0.05	0.05
				0.05	0.45						0.34	0.47
				0.91	1.05						0.92	0.57
				0.51	0.68						0.15	1.13
				0.13	1.62						0.11	0.29
				0.13	0.47						0.56	1.84
				0.47	0.98						0.36	0.94
				1.94	0.65						0.46	0.4
				3.89	2.95						0.09	2.1
				2.53	2.73						1.57	1.05
				0	1.65						0.23	5.47
				0.87	1.92						0.5	0.09
				0.5	0.18						0.06	1.56
				0.37	0.62						1.71	1.51
				0.5	1.15						0.98	0.24
				0.82	0.25						0.37	1.45
				0.22	0.64						2.11	0.43
				0.04	1.88						0.26	2.04
				0.46	2.08						0.25	0.54
				0.12	1.29						0.08	0.36
				0.2	1.31						0.81	0.28
				0.08	0.91						0.1	1.41
				0.05	0.51						0.24	0.75
				2.31	0.44						0.6	0.91
				0.02	0.36						0.8	1.08
				0.58	0.2						0.18	0.28
				0.37	1.83						1.01	0.16
				1.65	1.07						0.09	0.72
				1.48	0.52						0.07	0.17
				2.11	0.12						0.35	0.11
				0.89	0.15						0.1	0.23
				0.74	0.66						0.31	0.33
				5.37	1.31						1.42	0.15
				0.89	1.42						0.08	1.27
				0.41	0.07						0.44	0.59
				0.15	0.48						0.68	0.05
				1.34	1.94						0.15	0.36
				0.92	0.69						0.1	1.17
				0.24	0.88						0.48	0.05
				0.12	0.9						0.8	0.47
				0.07	0.8						0.51	0.3
				0.72	0.94						1.02	0.2
				0.22	0.95						0.45	0.63
				0.13	2.79						1.07	0.31
				0.37	2.22						1.31	0.09
				2.77	2.24						1.73	0.01
				1.84	0.5						1.75	0.56
				0.27	2						0.85	1.61
				0.04	1.81						1.19	3.98
				0.27	3.51						0.32	0.64
				0.04	0.36						0.05	0.34
				0.01	1.63						1.64	1.83
				0	1.69						1.39	1.77
				0.3	0.83						0.18	0.31
				0.39	0.28						2.85	0
				0.49	0.3						0.32	0.23
				1.2	0.8						0.74	0.16
				0.67	0.51						1.46	0.01
				0.92	0.49						0.57	0.42
				1.56	4.56						0.2	0.1
				1.92	0.33						0.52	0.42
				2.63	1.67						0.12	0.37
				1.58	0.91						0.2	0.53
				0.43	0.16						0.32	0.31
				1.8	0.46						0.37	1.69
				0.65	2.01						1.28	0.68
				1.43	1.52						0.6	0.35
				0.5	1.06						0.24	0.12
				0.09	0.75						0.14	0.23
				1.27	0.4						0.39	0.13
				2.7	0.67						0.59	0.47
				1.31	2.37						1.22	1.09
				0.3	0.9						0.49	0.19
				0.46	0.29						0.52	0.51
				1.23	0.92						1.19	0.42
				0.33	0.4						0.01	0.43
				0.05	0.31						2.21	0.11
				0.76	0.56						0.04	0.34
				0.12	0.53						0.43	0.68
				0.92	1.29						1.27	0.65
				0.13	2.94						1.02	1.41
				0.51	0.38						0.11	0.04
				1.03	0.09						0.32	0.77
				0	0.94						0.51	0.5
				0.21	0.48						0.22	0.42
				0.29	0.03						0	0.52
				0.12	1.25						0.81	0.19
				0.5	1.18						0.99	0.44
				0.23	1.08						0.5	3.26
				1.42	0.8						0.44	0.63
				0.44	0.38						0.13	3.78
				0.04	0.1						0.15	0.93
				0.67	1.79						0.13	0.94
				0.08	0.09						0.24	0.7
				0.94	0.41						0.21	0.11
				1.93	1.55						0.59	6.22
				0.03	0.01						1.58	0.05
				0.58	0.12						0.29	0.1
				1.96	0.03						1.04	0.29
				0.44	0.58						0.54	0.51
				0.35	0.48						0.08	2.93
				2.12	0.37						0.53	0.68
				0.61	0.8						0.85	1.06
				1.29	0.39						0.36	0.18
				0.05	0.08						1.75	0.52
				0.32	0.08						0.48	0.7
				0.37	0.33						0.52	1.65
				0.1	2.86						0.85	0.49
				0.15	0.38						0.3	0.14
				0.57	0.02						0.3	1.24
				0.03	0.36						1.32	0.48
				1.54	0.15						0.06	2.42
				0.43	1.56						0.26	0.16
				0.5	0.45						1.3	0.1
				0.71	1						1.93	0.46
				0.93	0.24						0.9	0.05
				0.33	1.51						1.09	0.13
				2.27	1.16						6.2	0.82
				0.45	0.73						0.78	0.71
				0.49	0.17						0.03	0.16
				1.23	0.4						1.36	0.36
				1.38	0.56						1.11	1.1
				0.28	0.35						0.04	0.25
				0	0.46						0.9	0.42
				0.63	0.9						0.42	0.02
				1.64	0.01						0.82	0.35
				2.06	1.46						1.14	0.3
				0.69	0.65						0.25	1
				0.1	1.56						1.07	1.09
				1.72	0.48						0.08	0.05
				0.76	0.5						1.62	0.19
				1.34	0.43						2.98	1.07
				0.35	0.34						1.94	1.2
				0.79	0.23						0.01	0.3
				0.21	0.18						0.93	0.2
				1.26	0.79						1.4	1.91
				1.47	0.03						2.82	0.32
				1.26	0.24						0.37	0.91
				0.88	2.67						1.19	0.14
				1.34	1.04						0.67	0.09
				0.93	0.66						1.96	0.02
				1.23	0.74						0.95	0.27
				1.54	0.31						0.45	0.37
				1.05	1.1						1.25	1.37
				1.02	0.43						0.73	0
				0.67	0.87						0.09	0.28
				0.65	0.09						5.34	0.84
				0.97	0.63						4.07	1.27
				0.62	0.9						0	0.38
				0.58	1.76						0.76	0.7
				1.03	0.39						0.52	0.76
				1.54	0.74						0.3	0.56
				0.96	0.1						0.52	1.11
				0.52	1.42						1.25	1.47
				1.04	0.01						1.11	0.06
				0.93	0.02						2.52	0
				0.86	0.04						0.03	1.01
				0.5	0.37						0.95	0.46
				2.57	0.15						0.93	2.63
				0.77	1.97						0.15	0.39
				0.9	0.31						0.66	0.48
				0.58	1.23						0.49	0.21
				0.58	1.42						0.93	0.05
				0.95	0.12						0.58	0.37
				1.16	0.11						0.21	0.39
				1.03	0.46						0.71	1.17
				1	0.05						1.06	1.16
				1.05	0.54						0.1	0.57
				1.68	0.39						1.02	0.22
				1.19	0.35						0.13	0.72
				0.51	0.07						0.26	0.73
				0.44	0.15						0.05	0.43
				1.7	0.83						0.37	0.39
				1.19	0.49						0.83	0.44
				0.82	0.54						0.54	0.28
				0.63	1.96						1.15	0.26
				0.99	0.41						0.24	0.16
				1.8	0.05						0.7	0.06
				1.14	0.01						1.87	0.1
				0.71	0.18						0.98	0.3
				0.35	0.45						1.77	0.05
				2.68	0.91						0.61	0.2
				3.06	0.17						0.05	0.33
				3.7	2.17						0.72	3.61
				1.51	0.51						0.42	0.15
				1.25	1.89						3.93	1.14
				0.79	0.5						2.44	0.77
				1.16	1.95						3.72	0.69
				1.39	0.28						0	1.63
				3.33	0.21						0	0.17
				0.86	0.13						1.18	0.33
				1.07	0.51						0.22	0.7
				1.17	1.5						0.52	0.54
				1.26	2.01						0.73	0.18
				0.81	0.08						0.26	0.24
				2.6	0.04						1.69	0.99
				0.52	0.43						2.43	1.69
				1.09	2.26						0.99	0.04
				2.52	0.32						0.6	0.05
				0.99	0.08						0.29	0.29
				1.33	0.07						0.95	2.18
				1.06	1.2						0.85	0.02
				1.92	1.31						0.63	0.63
				2.49	0.32						1.19	0.23
				5.73	0.01						0.63	1.68
				2.22	0.11						8.55	0.24
				0.37	1.93						1.13	0.13
				2.15	1.22						2.75	0.28
				1.01	0.17						1.41	1.09
				5.27	0.08						0.05	0.61
				0.47	0.11						1.23	0.04
				2.79	1.32						1.22	0.95
				1.1	0.6						1.2	0.54
				2.17	0.32						0.21	0.12
				1.09	1.11						1.64	0.99
				1.15	0.46						0.7	2.8
				1.18	0.31						0.05	0.69
				0.44	0.15						0.24	2.39
				0.52	1.03						0	0.05
				0.68	0.15						1.01	0.41
				0.65	0.54						0.08	0.29
				6.86	1.04						0.61	0.44
				0.89	0.58						0.37	0.34
				0.24	0.86						0.43	0.65
				0.11	0.4						0.12	0.58
				1.54	1.73						1.14	0.07
				0.38	1.25						0.47	0.51
				1.51	0.02						0.24	0.22
				3.42	1.47						0.06	0.1
				0.61	0.62						1.39	0.22
				1.31	0.21						1.54	0.32
				4.79	1.46						1.38	0.05
				0.04	1.23						1.35	0.08
				0.3	1.71						0.66	0.49
				1.24	0.33						0.25	0.06
				1.08	0.01						0.4	0.43
				0.25	0						2.11	1.01
				0.24	0.02						1.15	0.86
				0.12	0.63						1.29	0.78
				0.12	0.41						0.22	0.45
				0.1	0.62						1.05	1.03
				0.3	0.55						0.27	1.69
				0.54	0.58						0.29	0.47
				4.69	1.08						1.03	0.27
				0.06	0.65						0.25	0.53
				0.62	0.75						3.18	0.93
				1.25	0.45						0	0.29
				0.07	0.37						0.38	0.5
				0.01	0.2						0.85	0.06
				3.36	0.45						0.22	0
				0.89	0.48						0.1	1.13
				0.3	0.94						0.89	0.18
				0.12	0.01						0.65	0.06
				0.37	2.8						0.33	0.04
				1.45	0.23						1.45	0.26
				0.47	0.03						2.03	0.12
				3.77	0						0.34	0.45
				0.02	0.74						0	0.31
				0.12	1.27						0.14	0.03
				1.17	0.13						0.71	0.48
				4.11	0.18						0.33	0.61
				2.65	0.53						0.46	0.37
				0.66	0.17						0.56	0.75
				0.85	0.58						1.39	0.63
				0.99	0.04						0.05	1.45
				0.94	0.36						0.4	1.06
				1.51	2.3						1.91	0.15
				0.24	0.58						0.28	1.02
				0.11	0.49						0.39	0.61
				0.38	0.43						1.17	0.24
				2.3	2.9						0.43	0.1
				0.97	0.38						0.03	0.33
				0.13	1.13						0.98	0.05
				0.56	1.16						0.29	0.88
				0.53	0.32						1.74	0.13
				1.23	1.07						0.6	0.02
				0.55	0.32						0.3	0.13
				0.27	0.84						0.18	0.44
				1.21	0.06						0.39	0.3
				0.37	1.1						1.52	0.1
				0.23	1.77						1.88	0.34
				0.26	0.11						1.21	0.1
				0.26	0.1						0.76	1.84
				1.37	0.59						1.12	0.32
				1.43	1.13						0.99	1.93
				1.94	0.69						1.16	0.2
				0	0.95						0.72	0.35
				0.58	1.62						2.72	0.98
				0.04	0.37						1.62	0.37
				0.08	0.76						1.25	0
				1.6	0.41						1.15	0.99
				0.28	0.5						0.81	0.39
				0.37	1.24						0.39	0.25
				1.15	1.33						2.95	0.23
				0.24	0.12						0.16	0.14
				0.76	0.83						0.97	0.72
				1.02	1.27						1.25	0.31
				0.19	0.46						1.06	0.02
				0.81	0.48						0.19	1.47
				1.8	0.21						0.81	2.34
				0.28	0.27						1.28	2.83
				0.66	0.66						0.99	1.81
				1.57	0.44						0.79	0.3
				3.3	1.72						0.27	0.13
				0.51	0.06						1.01	0.42
				0.64	2.17						2.65	0.42
				0.72	1.45						0.92	0.04
				0.61	1.02						1.36	0.52
				0.97	1.62						0.33	0.8
				0.67	0.48						0.64	0.05
				1.25	0.13						0.44	0.62
				0.7	0.11						1.32	1.55
				0.41	1						2.09	0.64
				0.88	0.57						0.43	0.31
				0.77	0.59						1.38	0.21
				0.29	0.53						1.27	0.41
				0.32	0.04						0.76	0.75
				0.55	0.1						1.23	0.05
				0.09	1.13						0.16	1
				0.92	0.93						0.82	0.33
				0	0.57						0.11	1.51
				1.19	0.81						0.59	1.44
				0.46	0.5						0.14	0.08
				1.15	1.22						0.02	1.1
				0.17	1.42						0.06	0.01
				0.84	1.9						0.51	0.13
				1.34	0.22						0.14	2.16
				0.07	1.61						0.13	0.23
				0.04	1.19						1.34	0.38
				0.04	0.37						0.09	1
				0.28	0.31						0.11	0.29
				1.32	0.7						1.46	0.24
				0.48	0.4						0.33	0.55
				0.97	0.3						0.06	0.53
				1.22	1.21						0	0.62
				0.29	0.41						0.21	1.73
				0.75	0.45						0.07	2.1
				0.68	0.15						0.36	2.12
				0.13	0.05						0.58	0.29
				0.9	1.27						0.66	0.17
				0.63	0.2						0.95	0.71
				0.74	0.12						1.38	0.46
				0.92	0.19						0.35	1.5
				0.87	0.91						0.27	0.31
				1.03	1.35						0.01	1.14
				2.44	1.26						1.29	1.15
				1.37	0.84						0.03	0.27
				0.64	0.28						0.38	1.23
				0.99	1						0.31	0.39
				1.24	0.09						1.66	0.39
				0.45	0.35						0.78	1.07
				1.16	0.94						2.6	0.48
				0.97	0.61						0.25	0.12
				1.24	0.68						0.28	1.91
				1.43	0.07						0.23	2.23
				0.53	0.58						0.41	0.43
				0.75	0.89						1.99	0.63
				0	1.44						0.89	0.28
				0	1.37						0.06	1.34
				0.98	0.13						0.62	0.03
				1.27	0.23						0.38	0.31
				1.6	0.29						1.04	1.56
				0.88	0						0.27	0.23
				0.22	0.02						0.04	0.03
				0.08	0.46						5.25	0.05
				0.2	1.33						1.32	0.5
				0.22	0.35						0.54	0.49
				1.24	0.95						0.34	0.73
				0.45	0.43						0.04	0.47
				0.21	0.21						2.42	0.33
				1.16	0.5						0.36	0.83
				0.74	1.16						0.47	1.34
				0.41	1.07						0.31	0.58
				0.42	3.25						0.88	2.3
				0.46	1.2						2.23	3.35
				0.87	1.07						0.28	0.37
				0.13	0.07						1.99	1.82
				0	1.12						0.21	0.86
				3.37	0.91						0.2	1.35
				0.87	0.6						0.74	0.35
				0	1.13						0.37	1.59
				0.26	0.07						1.2	0.8
				0.31	0.17						0.52	0.11
				0.34	0.04						0.08	0.33
				0.22	0.11						0.24	0.89
				0.28	0.74						1.03	0.08
				0.81	2.24						1.23	0.04
				0.23	0.36						0.46	0.02
				0.42	0.83						0	0.6
				0.42	1.47						0.05	3.28
				0.54	0.74						1.86	0.51
				0.16	0.17						2.31	0.92
				0.47	0.61						0.63	0.54
				0.13	2.04						1.94	2.76
				0.82	1.12						0.91	1.85
				5.62	0						1.21	1.53
				5.05	1.59						0.45	0.97
				1.18	0.12						0.08	1.09
				5.52	2.53						1.27	0.43
				0.25	0.81						0.1	2.3
				0.6	1.64						0.25	1.59
				1.16	0.73						1.29	0.7
				0.64	1.4						0.68	2.36
				0.68	3.09						0.71	0.78
				0.55	0.3						0	2.6
				0.87	0.13						0.52	0.58
				5.16	0.05						0.15	4.8
				3.23	2.68						1.22	1.17
				0.53	2.02						2.97	2.23
				0.48	0.18						0.47	1.01
				0.13	0.28						0.34	0.53
				0.61	1.41						0.73	0.01
				0.52	0.28						4.48	0.05
				1.67	0.5						0.15	0
				1.08	0.64						0.5	0.21
				5.76	0.32						1.58	0.67
				0.95	0.08						0.05	0.35
				1.02	2.34						1.09	1.08
				0.32	0.37						1.07	0.67
				1.9	0.28						0.16	0.29
				0.73	0.35						1.77	0.43
				0.48	1.27						0.66	0.03
				1.96	2.21						0.52	0.93
				1.27	0.14						0.01	1.13
				0.03	0.01						1.68	1.11
				0.05	0.05						0.32	0.36
				4.61	0.66						0.81	0.24
				0.48	1.6						1.41	0.94
				0.38	0.37						0.09	0.35
				1.56	2.74						2.07	0.86
				1.17	1.71						0.41	0.53
				0.73	0.17						1.65	0.84
				0.67	1.34						0.94	0.81
				0.27	4.14						0.06	0.62
				3.37	2.06						1.04	0.47
				2.83	0.04						0.52	1.14
				1.16	0.01						0.74	0.8
				1.99	0.52						2.88	0.26
				1.32	0.87						1.25	0.13
				0.13	0.26						2.99	1.38
				1.59	1.57						0.17	0.63
				1.91	2.11						1.72	0.25
				0.29	2.66						0.04	0.4
				0.91	1.54						0.45	0.5
				1.3	0.07						0.18	1.5
				1.38	0.02						1.4	0.67
				0.47	0.73						0.68	0.49
				2.26	0.41						1.93	0.72
				0.51	0.93						0.46	0.81
				1.78	0.59						1.39	0.37
				0.3	2.39						0.53	2.27
				1.02	0.04						0.39	0.06
				0.15	0.21						0.03	1.37
				0.61	0.03						3.9	1.17
				0.32	0.23						2.5	2.49
				2.87	2.52						1.13	0.22
				0.05	0.21						1.2	1.06
				0.05	3.4						0.36	0.73
				1.46	3.08						1.58	0.18
				2.39	0.29						0.7	0.96
				0.56	0.04						1.87	0.46
				0.26	0.08						0.77	0.22
				1.24	1.51						1.39	0.35
				0.61	0.04						2.1	2.22
				0.34	0.37						0.68	1.06
				0.34	0.51						1.78	1.07
				0.77	0						0.41	0.27
				0.04	0.05						0.78	1.78
				0.47	1.35						2.62	0.83
				0.55	0.02						1.71	1.15
				0	0.36						0	1.57
				0.42	0.58						1.14	0.52
				0.04	0.21						0.23	1.21
				0.91	0.24						0.96	0.3
				2.62	0.18						1.53	0.02
				1.26	1.46						1.08	0.18
				3.27	0.36						1.44	5.05
				2.88	0.7						1.83	0.59
				2.73	0.92						0.02	1.01
				0.63	0.32						4.19	0.3
				1.86	0.52						4.11	0.99
				0.05	0.3						1.54	1.38
				0.49	0.88						2.77	1.5
				0.32	0.52						1.28	1.53
				0.46	0.11						0.1	0.23
				0.98	0.01						1.32	0.09
				1.67	1.15						0.52	8.18
				0.75	0.04						0	0.3
				0.29	0.58						0.82	0.11
				0.63	1.02						2.27	0.23
				1.31	0.07						3.59	0.56
				1.65	0.45						2.34	0.15
				0.54	0.5						2.02	0.04
				0.34	0.72						2.02	1.16
				0.43	1.81						0.05	0.34
				0.59	1.65						0.23	6.03
				1.24	0.68						1.72	1.08
				0.53	0.39						6.81	0.13
				0.97	0.33						1.38	0
				0.54	0.37						0.21	2.33
				0.78	1.28						0.57	0.86
				1.83	0.09						3.08	0.81
				1.01	0.26						5.75	1.27
				0.24	1.5						3.52	1
				0.92	0.45						0.25	0.93
				1.43	0.29						1.41	0.89
				0.47	0.48						1.04	0.21
				0.6	0.89						2.06	0.37
				1.04	0.05						0.78	0.05
				0.36	0.04						0.02	0.58
				1.27	0.37						0.77	0.71
				2.5	0.31						0.04	0.1
				1.11	0.04						0.54	1.94
				2.95	0.17						0.66	0.31
				2.81	0.32						5.16	0.06
				1.21	0.08						1.33	1.57
				0.65	0.03						0.74	0.37
				2.17	0.11						2.64	1.8
				1.01	1.04						0.95	1.49
				0.37	1.12						0.42	3.59
				0.6	0.3						0.21	1.36
				1.12	0.52						0.63	0.2
				0.21	0.44						1.81	0.54
				0.95	2.43						0.33	0.56
				1.18	0.1						0.29	0.2
				1.28	3.66						0.01	0.77
				0.04	0.21						0.06	0.26
				1.82	0.3						1.02	1.87
				0.05	0.77						0.81	0.52
				0.9	0.33						0.13	0.1
				1.56	0.13						0.58	0.62
				1.45	1.76						0	0.5
				0.37	0.01						0.09	0.62
				1.58	0.12						0.44	0.37
				1.36	0.44						0.03	0.15
				1.01	0						0.28	0.19
				0.44	0.01						0.36	0.05
				0.44	0.75						0.67	0.02
				4.66	0.98						0.37	0.74
				1.2	0.58						1.28	0.62
				0.44	0.22						3.24	0.61
				0.04	0						0.01	7.62
				0.4	0.13						0.32	3.43
				0.27	0.02						0	3
				0.39	0.91						0.31	0.91
				2.32	2.16						0.32	0.11
				0	0.23						0.01	0.11
				0.27	1.26						1.05	1
				1.53	0.17						0.18	3.46
				0.35	0.14						0.48	0.45
				0.94	0.32						1.68	0.34
				1.13	0.49						1.2	1.22
				0.38	0.84						0.57	0.68
				0.2	0.47						1.54	2.66
				1.41	0.23						1.61	0.03
				0.72	2.27						0.69	0.08
				0.73	0.66						0.94	8.4
				0.18	2.19						0.73	0.63
				1.45	2.53						0.53	0.62
				0.99	0.08						1.47	0
				0.09	0.13						2.04	0.32
				3.2	0.04						1.8	0.26
				1.32	0.27						1.24	0.88
				0.63	0.96						0.05	1.01
				1.51	2.46						0.51	0.94
				0.76	0.54						0.12	0.93
				0.5	0.05						0.73	0.85
				0.31	0.98						0.52	0.64
				0.04	1.49						0.12	0.2
				0.28	0.4						0.31	0.77
				0.01	1.26						2.56	0.4
				0.89	0.46						0.42	0.14
				0.5	0.8						1.03	0.86
				1.57	0.53						0.7	0.13
				0.35	0.47						0.46	0.1
				0.02	0.05						0.04	1.27
				0.08	0.08						0.19	1.36
				0.23	0.89						0.12	1.41
				0.07	1.55						0.02	0.31
				0	1.95						0.22	3.17
				2.43	0.85						1.05	0.42
				0.79	2.45						0.32	0.96
				0.02	1.9						0.11	0
				0.61	0.25						0	0.37
				0.37	1.63						1.16	1.33
				1.17	0.55						0.24	1.18
				0.37	0.22						1.08	0.37
				0.28	0.74						0.04	1.59
				1.79	0.29						0.17	1.41
				0.08	0.4						0.66	0.1
				1.1	0.33						1.9	0.87
				0.11	1.64						0.68	0.21
				0.08	0.05						0.26	1.59
				0.33	1.46						1.62	0.11
				1.56	0.29						1.15	0.56
				0.34	0.3						0.33	2.58
				0.25	0.12						1.12	2.42
				0.39	0.78						0	0.06
				0.51	0.56						0.59	1.46
				0.58	0.29						0.62	0.3
				1.99	0.24						0.4	0.49
				0.98	0.08						0.06	0.04
				0.42	0.34						0.22	0.3
				0.37	0.27						0.05	0.05
				1.34	0.31						0.79	0.12
				1.63	0.19						0.39	3.36
				0.07	0.33						0.07	1.96
				0.07	0.24						0.85	0.52
				1.4	0.7						1.12	0.71
				0.22	1.92						1.42	1.3
				0.04	1.61						0.6	0.67
				0.94	0.82						0.73	2.25
				0.38	0.35						1.25	0.98
				1.01	0.04						0.01	0.29
				0.74	1.26						0.66	1.77
				0.08	1.32						0.31	0.31
				0.41	0.14						0.18	0.05
				0.49	1						0.3	0.27
				1.47	0.4						0.35	1.71
				1.26	0.13						1.11	0.71
				1.41	0.99						0.38	0.69
				0.92	0.08						0.13	0.1
				0.22	0.12						0.42	0.06
				1.52	0.19						0.99	0.37
				0.37	1.57						0.46	0.12
				0.41	0.1						1.86	0.35
				1.21	0.09						0.86	0.04
				1.28	0.83						0.19	0.06
				0.36	0.12						2.21	1.21
				0.03	0.29						0.43	0.48
				0.07	0.35						0.3	2.74
				1.19	0.49						0.37	0.14
				0.22	0.36						0.42	0.46
				0.93	0.43						0.72	1.4
				0.12	1.06						1.09	0.04
				0.26	0.73						0.24	1.14
				0.22	0.12						1.35	0.05
				0.77	0.5						0.3	1.01
				0.57	0.1						0.45	0.7
				0.14	0.16						0.3	0.64
				0.42	0.39						0.31	0.43
				0.77	0.41						1.38	1.35
				1.16	0.99						0.79	1.46
				0.64	0.04						0.62	0.19
				0.9	0.14						0.28	1.16
				0.11	0.07						0.86	2.21
				0.36	0.04						1.61	1.86
				0.95	0.48						0.32	0.09
				2.11	2.84						0.37	1.71
				1.03	0.36						0.55	0.53
				0.24	1.06						0.62	1.25
				0.76	1.13						0.4	0.05
				0.83	0.18						1.48	0
				0.32	0.51						0.64	2.68
				0.03	0.03						0.31	1.04
				0.11	0.01						1.39	0.45
				0.34	1.8						0.34	0
				0.47	0.35						1.06	0.38
				0.67	0.27						0.33	0.24
				0.05	1.13						1.19	0.47
				0.57	1.59						0.64	0.12
				0.42	0.3						0.93	0.11
				0.96	1.22						0.77	1.9
				0.08	0.62						0.64	0.04
				0.45	1.3						1.03	0.04
				3.23	1.35						0.17	0.63
				0.01	2.41						0.83	2
				0.72	0.41						0.95	1.2
				0.65	1.1						0.11	1.08
				0.95	0.42						0.04	0.46
				0.69	0.38						0.1	0.31
				0.29	0.32						0.54	1.21
				1.34	0.16						0.85	0.63
				1.99	0.36						1.67	0.04
				2.1	0.04						1.08	0.65
				0.86	0.05						0.4	0.12
				0.31	0.82						1.11	1.13
				0	0.73						1.39	2.86
				0.5	0.02						0.2	1.2
				0.53	1.53						0.48	1.87
				0	0.14						1.01	0.62
				0.64	0.23						0.41	0.38
				0.4	1.45						0.47	0.88
				0.28	0.05						0.03	1.25
				0.03	0.01						1.4	0.33
				1.08	1.71						0.01	0.35
				0.89	1.36						0.92	0.06
				0.47	0.05						0.38	0.41
				0.03	0.15						1.14	1.08
				0.09	1.46						0.35	0.45
				0.02	0.73						1.31	1
				0.04	0.05						1.54	0.52
				4.21	0.08						0.42	0.06
				0.28	0.03						0.11	0.34
				1.99	1.04						1.69	0.04
				0.4	0.83						1.01	1.56
				0.05	0.41						1.06	0.91
				0.84	1.05						0.59	2.63
				0.24	0.95						0.04	1.27
				0.24	0.36						0.86	0.16
				0.46	0.43						0.18	0.05
				2.34	0.45						0.81	0.37
				0.88	0.13						0.58	0.82
				0.69	0.2						0.05	0.24
				1.99	0.83						0.39	0.62
				0.2	0.27						1.98	1.94
				0.09	0.35						1.14	0.68
				0.88	1.42						0.7	0.78
				0.1	1.6						0.25	0.55
				0.63	0.4						1.2	0.64
				0.65	0.02						1.58	1.47
				0.49	0.63						1.07	2.6
				0.19	0.2						0.39	0.05
				1.04	0.09						0.42	0.04
				1.37	0.04						1.81	0.85
				0.99	1.49						0.54	1.94
				0	2.28						2.02	0.5
				0.22	0.04						0.22	1.67
				0.37	0.35						3.37	0.04
				1.75	0.84						0.3	0
				0.05	0.7						0.83	0.93
				0.33	0.14						0.23	0.6
				0.5	2.13						0.69	0.24
				0.05	0.85						0.31	1.49
				0.71	0.9						0.54	2.39
				1.96	0.14						2.37	2.69
				1.92	0.78						0.16	0.03
				0.29	0.39						0.13	1.46
				2.56	0.1						0.1	0.46
				0.4	0.04						0.09	0.33
				1.11	0						0.37	0
				0.04	0.87						0.68	0.13
				0.32	0.43						0.29	0.52
				0.76	1.1						0.42	1.27
				0.39	0.45						0.76	1.3
				0.39	0.11						1.13	0.98
				0.42	1.06						1.89	0.52
				0.11	0.36						0.17	0.16
				0.08	1.24						0.73	0.26
				0.84	0.78						0.74	0.96
				0.01	3.75						1.36	0.74
				1.01	2.67						2.05	1.07
				0.43	0.53						0.48	0.57
				1.53	0.81						0.43	0.05
				1.42	0.11						0.23	0.37
				0.08	0.92						2.86	0.51
				1.46	0.19						0.03	0.04
				0.03	1.27						1.13	0.22
				0.72	0.31						0.65	0.03
				1.6	0.63						0.28	1.95
				1.9	0.61						0.92	0
				1.7	2.52						2.13	0.65
				1.43	0.29						0.28	1.1
				0.16	0.95						0.08	0.72
				2.01	0.21						0.96	1.31
				5.68	0.71						0.45	2.4
				0.73	0.23						0	1.32
				0.69	0.7						0.78	0.42
				1.83	1.02						0.34	0.6
				1.01	1.06						0.08	0.45
				0.38	0.02						1.34	0.05
				1.72	0.02						0.48	0.04
				0.93	0.35						0.11	0.05
				0.04	0.77						0.33	0.13
				0.57	0.89						2.66	1.74
				3.07	0.53						1.09	0.81
				0.78	0.11						1.24	0.02
				0.7	1.46						1.02	0.37
				0.62	2						0.08	0.22
				0.57	0.1						0.36	0.42
				1.55	2.02						0.78	0.71
				1.79	0.45						2.22	1.1
				1.67	0.52						1.99	0.49
				0.49	0.04						0.1	1.38
				1.19	0.06						0.2	0.28
				0.09	0.05						1.28	0.96
				1.46	0.03						0	1.31
				0.11	0.56						0.36	0.63
				1.53	0.37						0.78	0.45
				1.75	2						0.84	0.04
				1.5	1.15						0.5	0.09
				0.39	0.75						0.84	0.36
				0.56	0.36						0.56	0.05
				1.29	0.4						0.18	0.59
				1.23	0.78						0.73	0.24
				0.56	0.13						0.24	0.69
				0.67	0.34						0.83	0.22
				0.25	2.23						0.09	0.62
				1.04	3.14						1.92	0.45
				0.05	0.41						0.23	0.13
				2.98	0.74						0.68	0.49
				2.97	0.04						0.3	1.36
				1.44	5.21						0.55	0.04
				1.46	0.13						0.12	1.36
				1.15	0.84						0.87	0.37
				1.21	0.62						1.58	1.38
				0.13	0.54						0.97	0.34
				0.87	1.39						0.72	0.35
				1.68	0.01						0.95	0.25
				2.57	0.03						0.38	0.77
				1.03	1.36						0.14	0.03
				0.43	0.05						0.18	1.91
				1.52	0.04						0.25	0.1
				1.08	0.04						0.28	2.11
				1.15	0.01						0.32	0.05
				1.65	0.35						0.04	0.63
				0.56	0.34						0.04	0.55
				0.84	0.43						0.22	0.57
				0.56	0.72						0.13	1.23
				1.95	0.92						0.68	1.54
				2.3	0.52						0.1	0.28
				0	0.51						0.79	1.38
				1.36	0.48						0.36	0.1
				0.15	0.69						3.41	2.32
				2.89	0.52						1.34	1.14
				0.4	1.11						0.81	0.59
				0.2	0.04						0.01	0.67
				0.8	1.1						0.62	0.35
				0.52	0.23						0.32	0.19
				0.95	0.35						1.44	0.04
				2.58	0.6						1.85	0.41
				1.78	0.28						0.5	0.42
				2.6	0.76						0.71	0.29
				0.46	0.1						1.4	1.34
				0.12	0.28						0.51	0.04
				1.65	2.15						1.33	0.82
				1.1	0.9						7.44	0.1
				0.08	0.19						0.57	0.37
				0.47	0.46						0.84	0.04
				1.07	0.62						1.68	0.53
				1.54	0.34						6.07	0.31
				0.04	0.85						0.11	0.5
				0.25	0.6						0.23	0.19
				1.84	1.16						2.88	2.04
				1.08	0.38						2.01	1.45
				0.37	0.06						0.46	1.91
				1.52	0.86						0.06	0.65
				1.82	0.24						0.77	1
				1.61	0.36						0.58	1.82
				0.71	0.01						0.5	0.78
				0.47	0.02						0.61	0.67
				0.81	0.05						0.05	0.43
				1.26	0.03						0.92	0
				0.36	1.47						1.6	0.24
				1.67	0.28						0.6	0.12
				1.6	1.22						1.35	2.59
				1.43	0.17						0.73	0.42
				0.49	0.85						0.22	0.59
				0.9	4.42						0.94	0.27
				0.58	0.72						1.34	0
				0	0.5						0.31	1.07
				0.37	0.75						2.48	0.26
				0.6	0.54						1.06	0.55
				0.47	0.08						0.25	0.34
				2.18	0.25						0.64	0.06
				1.19	1.05						0.43	0.54
				0.05	1.59						0.12	0.52
				0	1.08						0.4	3.06
				1.1	0.64						0.48	0.43
				0.06	1.01						0.03	0.42
				0.06	2.8						0.66	2.83
				2.03	0.4						0.5	1.17
				0.22	0.69						0.04	0.29
				0.07	0.32						0.58	0.43
				0.45	2.63						0	0.4
				1.65	0.64						0.34	0.49
				0.89	0.09						0.62	0.15
				1.03	0.24						0.3	0.57
				0.17	0.12						2.88	0.4
				1.13	0.35						0.05	0.29
				0.57	0.52						0.27	1.25
				0.28	0.48						0.74	0.35
				0.19	0.05						1.45	0.21
				0.19	2.31						2.09	0.05
				0.1	0.52						0.67	0.33
				0.46	0.11						1.93	0.87
				0.09	0.02						0.52	0.79
				0.33	0.04						1.72	0.91
				0	1.03						0.65	1.1
				0.16	1.42						2.32	1.82
				0.37	0.36						0.67	1.03
				0.5	0.36						1.87	2.44
				0.16	0.04						0.17	2.65
				0	0.26						0.16	0.86
				1.87	0.61						0.2	0.36
				0.37	0.11						0.02	0.05
				0.82	0.11						2.06	1.33
				0.3	0.11						0.88	0.37
				1.53	0.01						2.27	2.11
				0.35	0.03						0.36	0.4
				0.47	0.28						0.58	0.05
				0.02	1.29						0.36	0.35
				2.05	1.22						2.94	0.01
				0.05	0.25						0.05	0.38
				0.48	0.32						0.26	1.14
				1.34	0.7						0.93	0.05
				0.08	0.02						0.11	0.43
				0.12	1.06						0.34	0.15
				3.04	4.89						1.51	0.03
				0.56	0.52						0.32	1.03
				2.47	0.01						0.81	0.39
				1.02	3.66						0.52	0.01
				1.14	2.38						0.32	0.4
				1.28	0.34						0.46	0.68
				0.37	0.7						3.15	1.07
				0.32	1						0.63	1.06
				2.35	0						2.4	0.98
				2.94	1.87						0.7	1.85
				0.14	0.51						1.6	0.22
				1.23	0.05						0.65	1.85
				0.42	0.59						0.56	1.01
				0.72	0.32						0.06	0.5
				2.26	2.16						0.07	1.03
				3.86	0.17						0.7	0.27
				1.1	0.08						0.15	0.51
				1.38	0.71						1.33	1.91
				3.09	1.88						0.31	0.34
				0.73	1.17						3.03	0.76
				3.37	0.3						0.46	0.46
				0.81	0.82						1.12	0.42
				0.05	0.08						0.52	0.8
				0.5	0.27						0.29	1.48
				0.67	0.16						1.05	1.24
				0.47	0.63						1.41	0.38
				0.03	0.77						0.9	0.43
				0.85	0.43						0.35	1.11
				1.19	0.21						0.76	0.34
				1.92	0.54						1.65	0.52
				2.03	0.74						0.59	0.81
				1.19	0.3						1.55	1.04
				1.53	1.69						1.16	0.51
				1.31	1.86						1.13	0.57
				1.54	0.57						0.51	0.82
				0.15	0.28						0.84	0.71
				0.08	0.11						1.87	0.85
				0.5	1.02						3.03	0.79
				0.28	0.31						0.86	1
				2.47	2.11						0.89	0.89
				1.98	0.11						0.09	0.71
				0.05	1.76						0.86	1.15
				0.32	0.04						0.16	0.7
				0.05	0.14						1.64	0.32
				0.27	0.97						0.54	1.3
				0.57	1.31						0.11	1.25
				0.1	1.47						0.01	0.3
				0.01	1.07						0.22	0.27
				1.28	2.3						0.85	0.35
				1.06	0.61						1.22	0.34
				1.16	0.46						0.42	0.35
				1.32	0.03						1.8	0.29
				0.71	0.42						0.24	0.3
				1	0.97						0.05	0.93
				0.27	0.67						0.07	2.85
				0	0.33						1.05	0.08
				0.29	0.62						0.05	1.3
				1.65	1.63						0.1	0.28
				1.35	0.68						0.91	1.17
				0.33	0.14						1.59	0.78
				0.12	0.23						0.92	0.14
				1.4	0.34						0.34	0.35
				1.04	1.43						0.09	0.12
				0.37	1.73						0.01	0.28
				0.38	0.13						0.11	1.33
				2.21	0.3						1.27	0.33
				1.68	0.48						1.11	0.98
				2.81	1.42						0.45	0.16
				0.5	0.26						3.55	0.15
				1.37	0.25						0.02	1.77
				0.11	0.24						0.02	0.91
				1.54	0.65						0.47	1.77
				1.76	1.33						0.31	0.44
				0.16	1.14						0.01	0.44
				0.81	0.42						0.57	0.23
				0.03	0.17						2.21	0.63
				3.65	0.89						1.04	0.49
				0.27	0.54						0.83	0.93
				2.7	1.1						0.38	0.32
				0.1	1.6						1.21	0.47
				0.25	0.29						2.73	1.61
				0.92	1.25						1.72	1.39
				1.71	1.15						0.94	2.07
				1.21	1.4						1.77	0.37
				0.37	0.97						0.92	0.62
				0.67	0.71						2.26	0.39
				2.22	0.52						1.58	0.87
				0.29	0.2						5.84	0.86
				0.18	0.47						1.09	0.83
				0.82	0.99						0.23	0.36
				2.47	1.42						1.09	1.09
				0.63	0.46						0.13	0.04
				0.74	0.72						0.4	0.47
				0.37	1.61						8.79	0.23
				0.2	0.77						0.84	0.04
				0.94	0.11						1.34	0.1
				2.86	1.36						2.97	0.8
				0.04	0.36						0.1	1.23
				0.83	0.35						1.45	0.05
				0.17	1.03						6.06	0.61
				0.54	0.6						0.26	0.1
				1.13	0.01						0.42	0.61
				0.06	0.34						0.42	0.35
				0.2	0.18						0.85	1.4
				1.46	3.88						1.22	1.4
				0.51	0.34						0.72	0.31
				0.12	0.26						1.23	1.46
				1.23	1.23						1.12	1.06
				0.12	0.74						1.04	0.28
				0.48	1.71						0.68	0.12
				0.16	0.14						0.98	0.01
				0.55	1.97						0.46	0.16
				0.11	1.17						2.62	0.29
				1.67	0.33						2.54	0.11
				1.88	0.38						0.13	0.39
				2.45	0.27						0.44	1.78
				1.63	0.11						0.28	1.13
				1.67	0.46						2.54	0.22
				1.67	0.33						0.49	1.11
				0.38	1.78						2.71	3.55
				3.47	0.05						1.56	0.38
				0.16	0.29						1.53	0.01
				0.89	0.32						1.28	0.97
				1.49	0.18						0.38	0.35
				0.62	2.23						0.83	0.82
				0.21	0.05						0.14	0.77
				0.36	0.32						0.11	0.71
				0.93	1.04						0.35	0.1
				0.2	0.41						1.15	0.31
				0.73	1.28						0.13	0.65
				0.13	0.14						0.7	0.41
				0.89	0.41						0.59	0
				0.83	0.12						0.88	0.1
				3.05	1.12						0.33	0.33
				1.04	0.26						0.24	0.89
				5.28	0.07						0.51	0.83
				0.19	0.13						0.8	0.47
				0.04	0.46						0.37	0.12
				1.01	0.46						0.68	0.04
				0.45	0.84						0.74	0.32
				0.75	0.53						0.36	0.08
				0.19	0.72						0.66	1.14
				0.02	2.19						1.45	0.03
				0.08	0						0.21	1.2
				0.1	0.87						1.1	0.3
				0.11	0.32						1.55	0.04
				0.01	0.1						0	1.18
				0	0.01						0.65	0.72
				1.73	0.13						0.45	0.2
				0.19	0.1						0.86	1.36
				0.16	0.77						0.95	0.64
				0.94	0.03						0.22	0.43
				0.04	0.59						0.05	0.05
				0.94	0.51						1.07	0.31
				0.45	1.6						1.24	0.13
				0.65	0.74						0.05	1.92
				0.11	0.77						0.45	0.37
				0.56	0.49						0.39	0.03
				1.71	0.45						0.68	0.42
				0.11	0.29						0.83	0.53
				0.08	0.35						0.39	1.21
				0.27	1.25						0.31	0.04
				0.18	0.42						1.17	1.25
				0.32	1.48						1.17	0.93
				0.11	0.15						1.31	2.48
				0.13	0.26						1.59	0.41
				0.35	0.23						1.13	0.77
				1.18	0.35						2.25	1.19
				0.6	1.09						0.73	0.45
				0.28	0.99						3.34	0.05
				1.26	0.05						0.81	0.36
				0.24	0.42						1.37	0.39
				0.13	1.04						0.35	0.18
				0.56	2.74						0.06	0.11
				0.44	2.9						0.9	0.19
				0.33	1.51						0.38	0.12
				0.73	0.32						0.03	1.19
				0.15	0.41						0.18	0.54
				0.43	0.45						0.28	0.12
				0.38	0.57						1.24	0.26
				0.49	1.2						1.28	0.58
				0.37	0.85						1.06	0.27
				1.86	0.05						0.56	0.52
				0.41	1.75						0.24	0.92
				0.34	1.18						0.28	0.89
				0.47	0.12						0.12	0.89
				0.86	0.11						1.1	0.51
				0.01	0.84						0.43	0.44
				0	1.71						0.33	0.06
				0.25	0.25						3.56	0.62
				0.64	0.51						0.32	0.87
				0.05	0.49						0.84	0.92
				3.35	0.56						0.32	0
				0	2.07						1.31	0.31
				0.29	0.08						1.08	0.67
				0.84	0.77						1.4	0.6
				2.19	0.62						0.19	0.99
				0.05	0.3						6.1	0.69
				0.61	0.47						1.3	0.04
				0.95	0.1						0.38	0.08
				1.26	1.04						0.47	0.17
				0.1	0.41						0.71	0.37
				0.32	0.17						0.42	1.18
				0.03	1.43						0.73	1.13
				0.7	0.31						2.77	0.36
				0.94	1.23						1.12	0.41
				0.95	0.69						0.4	0.44
				0.36	0.15						0.41	0.02
				0.95	1.11						0.48	0.36
				1.45	1.07						1	0.19
				0.57	1.68						1.43	1.26
				0.03	0.28						1.86	0.04
				1.24	0.18						1.37	0.42
				1.02	0.33						0.58	0.16
				0.96	0.35						1.04	0.09
				0.54	2.01						0.56	0.8
				0.09	0.48						0.51	0.31
				0.34	0.48						0.43	0.78
				0.96	0.5						0.73	1.73
				0.03	0.23						1.12	1.3
				0.02	0.09						0.17	1.51
				1.19	0.11						0.06	0.74
				0.47	1.33						0.72	0.22
				1.91	0.19						0.97	1.41
				0.05	0.02						2.46	0.37
				0.46	0.37						0.99	0.33
				0.25	0.93						1.42	0.77
				0.32	0.46						1.23	0.06
				0.29	0.32						0.36	0.01
				0.26	0.48						0.03	1.83
				0.04	0.36						0.36	0.26
				1.16	0.94						1.15	0.27
				0.29	2.21						2.08	0.05
				0.25	0.37						1.39	0.4
				0.34	0.32						2.79	0.91
				0.33	0.43						0.43	1.75
				1.82	0.51						0.31	0.33
				0.14	1.35						1.16	2.39
				0.12	0.02						0.93	1.31
				0.31	0.38						2.03	0.45
[truncated: 101,436 more rows]
