# Supplementary material for: A neurotrophin functioning with a Toll regulates structural plasticity in a dopaminergic circuit
Source: eLife. 2024 Dec 20;13:RP102222. doi: 10.7554/eLife.102222 (PMC11661795; doi:10.7554/eLife.102222)
Supplement: Figure 6—figure supplement 1—source data 1. [file elife-102222-fig6-figsupp1-data1.xlsx]

## Sheet: Sheet1
Figure 6 figure supplement 1 source data 1
Data used to generate graph in Figure 6 figure supplement 1A
Controls for Figure 6E
	Locomotion 18°C control
Genotype	Walking_speed mm/s
tubGal80ts/+; DNT2Gal4/+ (Oregon)	7.80283
tubGal80ts/+; DNT2Gal4/+ (Oregon)	7.80683
tubGal80ts/+; DNT2Gal4/+ (Oregon)	8.00995
tubGal80ts/+; DNT2Gal4/+ (Oregon)	7.29578
tubGal80ts/+; DNT2Gal4/+ (Oregon)	6.35477
tubGal80ts/+; DNT2Gal4/+ (Oregon)	6.11703
tubGal80ts/+; DNT2Gal4/+ (Oregon)	4.63629
tubGal80ts/+; DNT2Gal4/+ (Oregon)	7.77323
tubGal80ts/+; DNT2Gal4/+ (Oregon)	4.19413
tubGal80ts/+; DNT2Gal4/+ (Oregon)	7.57443
tubGal80ts/+; DNT2Gal4/+ (Oregon)	6.69708
tubGal80ts/+; DNT2Gal4/+ (Oregon)	6.75981
tubGal80ts/+; DNT2Gal4/+ (Oregon)	5.49547
tubGal80ts/+; DNT2Gal4/+ (Oregon)	5.62015
tubGal80ts/+; DNT2Gal4/+ (Oregon)	6.06581
tubGal80ts/+; DNT2Gal4/+ (Oregon)	8.18738
tubGal80ts/+; DNT2Gal4/+ (Oregon)	4.94338
tubGal80ts/+; DNT2Gal4/+ (Oregon)	6.11046
tubGal80ts/+; DNT2Gal4/+ (Oregon)	7.93327
tubGal80ts/+; DNT2Gal4/+ (Oregon)	5.35402
tubGal80ts/+; DNT2Gal4/+ (Oregon)	5.33015
tubGal80ts/+; DNT2Gal4/+ (Oregon)	6.51048
tubGal80ts/+; DNT2Gal4/+ (Oregon)	6.04121
tubGal80ts/+; DNT2Gal4/+ (Oregon)	6.22301
tubGal80ts/+; DNT2Gal4/+ (Oregon)	5.3213
tubGal80ts/+; DNT2Gal4/+ (Oregon)	6.11412
tubGal80ts/+; DNT2Gal4/+ (Oregon)	6.28179
tubGal80ts/+; DNT2Gal4/+ (Oregon)	7.30993
tubGal80ts/+; DNT2Gal4/+ (Oregon)	6.62356
tubGal80ts/+; DNT2Gal4/+ (Oregon)	4.04144
tubGal80ts/+; DNT2Gal4/+ (Oregon)	5.0709
tubGal80ts/+; DNT2Gal4/+ (Oregon)	6.4985
tubGal80ts/+; DNT2Gal4/+ (Oregon)	6.67245
tubGal80ts/+; DNT2Gal4/+ (Oregon)	9.81082
tubGal80ts/+; DNT2Gal4/+ (Oregon)	10.4634
tubGal80ts/+; DNT2Gal4/+ (Oregon)	9.68206
tubGal80ts/+; DNT2Gal4/+ (Oregon)	5.72548
tubGal80ts/+; DNT2Gal4/UASDNT2FL	6.78194
tubGal80ts/+; DNT2Gal4/UASDNT2FL	6.79708
tubGal80ts/+; DNT2Gal4/UASDNT2FL	6.60077
tubGal80ts/+; DNT2Gal4/UASDNT2FL	6.4831
tubGal80ts/+; DNT2Gal4/UASDNT2FL	8.9474
tubGal80ts/+; DNT2Gal4/UASDNT2FL	7.06435
tubGal80ts/+; DNT2Gal4/UASDNT2FL	8.26944
tubGal80ts/+; DNT2Gal4/UASDNT2FL	7.68851
tubGal80ts/+; DNT2Gal4/UASDNT2FL	6.40965
tubGal80ts/+; DNT2Gal4/UASDNT2FL	6.89262
tubGal80ts/+; DNT2Gal4/UASDNT2FL	8.5606
tubGal80ts/+; DNT2Gal4/UASDNT2FL	6.40528
tubGal80ts/+; DNT2Gal4/UASDNT2FL	6.93191
tubGal80ts/+; DNT2Gal4/UASDNT2FL	5.46982
tubGal80ts/+; DNT2Gal4/UASDNT2FL	5.48826
tubGal80ts/+; DNT2Gal4/UASDNT2FL	6.80346
tubGal80ts/+; DNT2Gal4/UASDNT2FL	6.44188
tubGal80ts/+; DNT2Gal4/UASDNT2FL	6.8443
tubGal80ts/+; DNT2Gal4/UASDNT2FL	4.96236
tubGal80ts/+; DNT2Gal4/UASDNT2FL	4.99413
tubGal80ts/+; DNT2Gal4/UASDNT2FL	4.51094
tubGal80ts/+; DNT2Gal4/UASDNT2FL	4.46425
tubGal80ts/+; DNT2Gal4/UASDNT2FL	5.02518
tubGal80ts/+; DNT2Gal4/UASDNT2FL	7.24759
tubGal80ts/+; DNT2Gal4/UASDNT2FL	6.52739
tubGal80ts/+; DNT2Gal4/UASDNT2FL	6.87119
tubGal80ts/+; DNT2Gal4/UASDNT2FL	6.05514
tubGal80ts/+; DNT2Gal4/UASDNT2FL	7.24223
tubGal80ts/+; DNT2Gal4/UASDNT2FL	5.93479
tubGal80ts/+; DNT2Gal4/UASDNT2FL	6.50314
tubGal80ts/+; DNT2Gal4/UASDNT2FL	5.66171
tubGal80ts/+; DNT2Gal4/UASDNT2FL	5.88684
tubGal80ts/+; DNT2Gal4/UASDNT2FL	6.96808
tubGal80ts/+; DNT2Gal4/UASDNT2FL	5.99719
tubGal80ts/+; DNT2Gal4/UASDNT2FL	4.49199
tubGal80ts/+; DNT2Gal4/UASDNT2FL	5.9748
tubGal80ts/+; DNT2Gal4/UASDNT2FL	5.46552
tubGal80ts/+; DNT2Gal4/UASDNT2FL	6.66761
UAS-DNT2FL/+ (Oregon)	4.43842
UAS-DNT2FL/+ (Oregon)	6.82957
UAS-DNT2FL/+ (Oregon)	4.3927
UAS-DNT2FL/+ (Oregon)	7.00186
UAS-DNT2FL/+ (Oregon)	4.35668
UAS-DNT2FL/+ (Oregon)	12.4089
UAS-DNT2FL/+ (Oregon)	13.2375
UAS-DNT2FL/+ (Oregon)	8.54494
UAS-DNT2FL/+ (Oregon)	5.7825
UAS-DNT2FL/+ (Oregon)	5.39921
UAS-DNT2FL/+ (Oregon)	4.25267
UAS-DNT2FL/+ (Oregon)	4.50627
UAS-DNT2FL/+ (Oregon)	4.19744
UAS-DNT2FL/+ (Oregon)	7.31403
UAS-DNT2FL/+ (Oregon)	6.34031
UAS-DNT2FL/+ (Oregon)	7.04239
UAS-DNT2FL/+ (Oregon)	7.97832
UAS-DNT2FL/+ (Oregon)	5.80832
UAS-DNT2FL/+ (Oregon)	5.28579
UAS-DNT2FL/+ (Oregon)	5.20698
UAS-DNT2FL/+ (Oregon)	4.61647
UAS-DNT2FL/+ (Oregon)	5.11322
UAS-DNT2FL/+ (Oregon)	8.54915
UAS-DNT2FL/+ (Oregon)	5.90296
UAS-DNT2FL/+ (Oregon)	4.82344
