# Supplementary material for: A neurotrophin functioning with a Toll regulates structural plasticity in a dopaminergic circuit
Source: eLife. 2024 Dec 20;13:RP102222. doi: 10.7554/eLife.102222 (PMC11661795; doi:10.7554/eLife.102222)
Supplement: Figure 6—figure supplement 1—source data 2. [file elife-102222-fig6-figsupp1-data2.xlsx]

## Sheet: Sheet1
Figure 6 figure supplement 1 source data 2 Locomotion in an arena upon DNT-2neuron activation
Freely behaving flies in an open arean, tracking and locomotion measurements.
Data used to generate graph in Figure 6 figure supplement 1B
18°C controls for Figure 6F
	Locomotion 18°C control
Genotype	Walking_speed mm/s
DNT2Gal4/+ (Oregon)	9.39725
DNT2Gal4/+ (Oregon)	5.45551
DNT2Gal4/+ (Oregon)	6.58712
DNT2Gal4/+ (Oregon)	6.38499
DNT2Gal4/+ (Oregon)	7.00677
DNT2Gal4/+ (Oregon)	6.00357
DNT2Gal4/+ (Oregon)	6.06751
DNT2Gal4/+ (Oregon)	11.4943
DNT2Gal4/+ (Oregon)	4.20335
DNT2Gal4/+ (Oregon)	8.29384
DNT2Gal4/+ (Oregon)	8.09314
DNT2Gal4/+ (Oregon)	10.8795
DNT2Gal4/+ (Oregon)	4.18807
DNT2Gal4/+ (Oregon)	10.3059
DNT2Gal4/+ (Oregon)	5.97835
DNT2Gal4/+ (Oregon)	5.29718
DNT2Gal4/+ (Oregon)	11.1302
DNT2Gal4/+ (Oregon)	4.81363
DNT2Gal4/+ (Oregon)	8.48038
DNT2Gal4/+ (Oregon)	4.21472
DNT2Gal4/+ (Oregon)	6.25709
DNT2Gal4/+ (Oregon)	8.00222
DNT2Gal4/+ (Oregon)	6.64768
DNT2Gal4/+ (Oregon)	5.68696
DNT2Gal4/+ (Oregon)	5.64476
DNT2Gal4/+ (Oregon)	4.77814
DNT2Gal4/+ (Oregon)	5.48579
DNT2Gal4/+ (Oregon)	5.56587
DNT2Gal4/+ (Oregon)	4.82741
DNT2Gal4/+ (Oregon)	4.75207
DNT2Gal4/+ (Oregon)	4.97771
DNT2Gal4>UASdTrpA1	7.58621
DNT2Gal4>UASdTrpA1	8.47516
DNT2Gal4>UASdTrpA1	6.95719
DNT2Gal4>UASdTrpA1	9.50983
DNT2Gal4>UASdTrpA1	7.68546
DNT2Gal4>UASdTrpA1	7.00286
DNT2Gal4>UASdTrpA1	7.81631
DNT2Gal4>UASdTrpA1	8.40383
DNT2Gal4>UASdTrpA1	6.47715
DNT2Gal4>UASdTrpA1	4.43886
DNT2Gal4>UASdTrpA1	8.94274
DNT2Gal4>UASdTrpA1	5.00074
DNT2Gal4>UASdTrpA1	5.63226
DNT2Gal4>UASdTrpA1	7.23886
DNT2Gal4>UASdTrpA1	8.3955
DNT2Gal4>UASdTrpA1	5.9158
DNT2Gal4>UASdTrpA1	9.83109
DNT2Gal4>UASdTrpA1	7.92039
DNT2Gal4>UASdTrpA1	7.0715
DNT2Gal4>UASdTrpA1	7.4197
DNT2Gal4>UASdTrpA1	7.18391
DNT2Gal4>UASdTrpA1	5.36921
DNT2Gal4>UASdTrpA1	7.82041
DNT2Gal4>UASdTrpA1	8.75357
DNT2Gal4>UASdTrpA1	6.2351
DNT2Gal4>UASdTrpA1	5.68859
DNT2Gal4>UASdTrpA1	7.59069
DNT2Gal4>UASdTrpA1	8.34088
DNT2Gal4>UASdTrpA1	6.85503
DNT2Gal4>UASdTrpA1	9.87847
DNT2Gal4>UASdTrpA1	7.58449
DNT2Gal4>UASdTrpA1	7.20096
DNT2Gal4>UASdTrpA1	7.69205
DNT2Gal4>UASdTrpA1	5.6118
DNT2Gal4>UASdTrpA1	6.83247
DNT2Gal4>UASdTrpA1	7.28732
DNT2Gal4>UASdTrpA1	9.08907
DNT2Gal4>UASdTrpA1	5.48341
DNT2Gal4>UASdTrpA1	5.85709
UAS dTrpA1/+ (Oregon)	7.43944
UAS dTrpA1/+ (Oregon)	4.4963
UAS dTrpA1/+ (Oregon)	5.32362
UAS dTrpA1/+ (Oregon)	5.7376
UAS dTrpA1/+ (Oregon)	5.9978
UAS dTrpA1/+ (Oregon)	9.29757
UAS dTrpA1/+ (Oregon)	8.66011
UAS dTrpA1/+ (Oregon)	11.3349
UAS dTrpA1/+ (Oregon)	6.24587
UAS dTrpA1/+ (Oregon)	8.77344
UAS dTrpA1/+ (Oregon)	6.08082
UAS dTrpA1/+ (Oregon)	6.46889
UAS dTrpA1/+ (Oregon)	5.9316
UAS dTrpA1/+ (Oregon)	6.4734
UAS dTrpA1/+ (Oregon)	5.44971
UAS dTrpA1/+ (Oregon)	4.41105
UAS dTrpA1/+ (Oregon)	6.65933
UAS dTrpA1/+ (Oregon)	5.25759
UAS dTrpA1/+ (Oregon)	8.34705
UAS dTrpA1/+ (Oregon)	8.62008
UAS dTrpA1/+ (Oregon)	10.7763
UAS dTrpA1/+ (Oregon)	6.60199
UAS dTrpA1/+ (Oregon)	5.08687
UAS dTrpA1/+ (Oregon)	6.25608
UAS dTrpA1/+ (Oregon)	7.30206
UAS dTrpA1/+ (Oregon)	5.72873
UAS dTrpA1/+ (Oregon)	7.22547
UAS dTrpA1/+ (Oregon)	5.80496
UAS dTrpA1/+ (Oregon)	6.99872
UAS dTrpA1/+ (Oregon)	5.59015
UAS dTrpA1/+ (Oregon)	10.1225
UAS dTrpA1/+ (Oregon)	8.86815
UAS dTrpA1/+ (Oregon)	14.148
UAS dTrpA1/+ (Oregon)	8.37049
UAS dTrpA1/+ (Oregon)	5.87124
UAS dTrpA1/+ (Oregon)	6.67724
UAS dTrpA1/+ (Oregon)	6.7536
UAS dTrpA1/+ (Oregon)	6.31702
