# Supplementary material for: A neurotrophin functioning with a Toll regulates structural plasticity in a dopaminergic circuit
Source: eLife. 2024 Dec 20;13:RP102222. doi: 10.7554/eLife.102222 (PMC11661795; doi:10.7554/eLife.102222)
Supplement: Figure 6—figure supplement 2—source data 1. [file elife-102222-fig6-figsupp2-data1.xlsx]

## Sheet: Sheet1
Figure 6 figure supplement 2 Altering DNT-2 levels induced seizures.
Data used to generate graphs in Figure 6 figure supplement 2: bang-sensitivity test
Left: DNT2 mutants
Genotype	recovery time (s)
Canton-S (wt)	2
Canton-S (wt)	2
Canton-S (wt)	2
Canton-S (wt)	1
Canton-S (wt)	3
Canton-S (wt)	2
Canton-S (wt)	2
Canton-S (wt)	2
Canton-S (wt)	1
Canton-S (wt)	1
DNT2[37]/DNT2[18]	4
DNT2[37]/DNT2[18]	5
DNT2[37]/DNT2[18]	12
DNT2[37]/DNT2[18]	13
DNT2[37]/DNT2[18]	13
DNT2[37]/DNT2[18]	16
DNT2[37]/DNT2[18]	16
DNT2[37]/DNT2[18]	7
DNT2[37]/DNT2[18]	13
DNT2[37]/DNT2[18]	13
DNT2[37]/DNT2[18]	5
DNT2[37]/DNT2[18]	2
DNT2[37]/DNT2[18]	2
DNT2[37]/DNT2[18]	4
DNT2[37]/DNT2[18]	2
