# Supplementary material for: A neurotrophin functioning with a Toll regulates structural plasticity in a dopaminergic circuit
Source: eLife. 2024 Dec 20;13:RP102222. doi: 10.7554/eLife.102222 (PMC11661795; doi:10.7554/eLife.102222)
Supplement: Figure 6—figure supplement 2—source data 2. [file elife-102222-fig6-figsupp2-data2.xlsx]

## Sheet: Sheet1
Figure 6 figure supplement 2 source data Altering DNT-2 levels induced seizures.
Data used to generate graphs in Figure 6 figure supplement 2: bang-sensitivity test				See Supplementary File 2.
Middle: tubGal80ts DNT-2Gal4>DNT-2RNAi
Genotype	recovery time (s)
tubGal80ts/+; DNT2Gal4/+ (Oregon)	6
tubGal80ts/+; DNT2Gal4/+ (Oregon)	7
tubGal80ts/+; DNT2Gal4/+ (Oregon)	8
tubGal80ts/+; DNT2Gal4/+ (Oregon)	7
tubGal80ts/+; DNT2Gal4/+ (Oregon)	7
tubGal80ts/+; DNT2Gal4/+ (Oregon)	16
tubGal80ts/+; DNT2Gal4/+ (Oregon)	9
tubGal80ts/+; DNT2Gal4/+ (Oregon)	24
tubGal80ts/+; DNT2Gal4/+ (Oregon)	9
tubGal80ts/+; DNT2Gal4/+ (Oregon)	11
tubGal80ts/+; DNT2Gal4/+ (Oregon)	12
tubGal80ts DNT2Gal4/UAS DNT2RNAi	6
tubGal80ts DNT2Gal4/UAS DNT2RNAi	6
tubGal80ts DNT2Gal4/UAS DNT2RNAi	8
tubGal80ts DNT2Gal4/UAS DNT2RNAi	11
tubGal80ts DNT2Gal4/UAS DNT2RNAi	7
tubGal80ts DNT2Gal4/UAS DNT2RNAi	13
tubGal80ts DNT2Gal4/UAS DNT2RNAi	8
tubGal80ts DNT2Gal4/UAS DNT2RNAi	14
tubGal80ts DNT2Gal4/UAS DNT2RNAi	14
tubGal80ts DNT2Gal4/UAS DNT2RNAi	27
tubGal80ts DNT2Gal4/UAS DNT2RNAi	19
tubGal80ts DNT2Gal4/UAS DNT2RNAi	19
tubGal80ts DNT2Gal4/UAS DNT2RNAi	8
tubGal80ts DNT2Gal4/UAS DNT2RNAi	8
tubGal80ts DNT2Gal4/UAS DNT2RNAi	12
tubGal80ts DNT2Gal4/UAS DNT2RNAi	12
tubGal80ts DNT2Gal4/UAS DNT2RNAi	15
tubGal80ts DNT2Gal4/UAS DNT2RNAi	17
tubGal80ts DNT2Gal4/UAS DNT2RNAi	25
tubGal80ts DNT2Gal4/UAS DNT2RNAi	48
tubGal80ts DNT2Gal4/UAS DNT2RNAi	6
tubGal80ts DNT2Gal4/UAS DNT2RNAi	6
tubGal80ts DNT2Gal4/UAS DNT2RNAi	18
tubGal80ts DNT2Gal4/UAS DNT2RNAi	11
tubGal80ts DNT2Gal4/UAS DNT2RNAi	37
tubGal80ts DNT2Gal4/UAS DNT2RNAi	6
tubGal80ts DNT2Gal4/UAS DNT2RNAi	8
tubGal80ts DNT2Gal4/UAS DNT2RNAi	9
tubGal80ts DNT2Gal4/UAS DNT2RNAi	17
tubGal80ts DNT2Gal4/UAS DNT2RNAi	32
tubGal80ts DNT2Gal4/UAS DNT2RNAi	6
tubGal80ts DNT2Gal4/UAS DNT2RNAi	6
tubGal80ts DNT2Gal4/UAS DNT2RNAi	8
tubGal80ts DNT2Gal4/UAS DNT2RNAi	5
tubGal80ts DNT2Gal4/UAS DNT2RNAi	14
tubGal80ts DNT2Gal4/UAS DNT2RNAi	44
tubGal80ts DNT2Gal4/UAS DNT2RNAi	5
tubGal80ts DNT2Gal4/UAS DNT2RNAi	8
tubGal80ts DNT2Gal4/UAS DNT2RNAi	9
tubGal80ts DNT2Gal4/UAS DNT2RNAi	12
tubGal80ts DNT2Gal4/UAS DNT2RNAi	35
tubGal80ts DNT2Gal4/UAS DNT2RNAi	17
tubGal80ts DNT2Gal4/UAS DNT2RNAi	6
tubGal80ts DNT2Gal4/UAS DNT2RNAi	19
tubGal80ts DNT2Gal4/UAS DNT2RNAi	32
tubGal80ts DNT2Gal4/UAS DNT2RNAi	30
tubGal80ts DNT2Gal4/UAS DNT2RNAi	19
tubGal80ts DNT2Gal4/UAS DNT2RNAi	20
tubGal80ts DNT2Gal4/UAS DNT2RNAi	33
tubGal80ts DNT2Gal4/UAS DNT2RNAi	7
tubGal80ts DNT2Gal4/UAS DNT2RNAi	6
tubGal80ts DNT2Gal4/UAS DNT2RNAi	38
tubGal80ts DNT2Gal4/UAS DNT2RNAi	10
tubGal80ts DNT2Gal4/UAS DNT2RNAi	7
tubGal80ts DNT2Gal4/UAS DNT2RNAi	14
tubGal80ts DNT2Gal4/UAS DNT2RNAi	25
tubGal80ts DNT2Gal4/UAS DNT2RNAi	42
tubGal80ts DNT2Gal4/UAS DNT2RNAi	75
tubGal80ts DNT2Gal4/UAS DNT2RNAi	81
tubGal80ts DNT2Gal4/UAS DNT2RNAi	83
tubGal80ts DNT2Gal4/UAS DNT2RNAi	100
tubGal80ts DNT2Gal4/UAS DNT2RNAi	26
tubGal80ts DNT2Gal4/UAS DNT2RNAi	21
tubGal80ts DNT2Gal4/UAS DNT2RNAi	19
tubGal80ts DNT2Gal4/UAS DNT2RNAi	30
tubGal80ts DNT2Gal4/UAS DNT2RNAi	6
tubGal80ts DNT2Gal4/UAS DNT2RNAi	6
tubGal80ts DNT2Gal4/UAS DNT2RNAi	6
tubGal80ts DNT2Gal4/UAS DNT2RNAi	42
tubGal80ts DNT2Gal4/UAS DNT2RNAi	48
tubGal80ts DNT2Gal4/UAS DNT2RNAi	18
tubGal80ts DNT2Gal4/UAS DNT2RNAi	31
UAS DNT2RNAi /+,Oregon	9
UAS DNT2RNAi /+,Oregon	14
UAS DNT2RNAi /+,Oregon	7
UAS DNT2RNAi /+,Oregon	7
UAS DNT2RNAi /+,Oregon	10
UAS DNT2RNAi /+,Oregon	13
UAS DNT2RNAi /+,Oregon	15
UAS DNT2RNAi /+,Oregon	6
UAS DNT2RNAi /+,Oregon	15
UAS DNT2RNAi /+,Oregon	25
UAS DNT2RNAi /+,Oregon	15
UAS DNT2RNAi /+,Oregon	27
UAS DNT2RNAi /+,Oregon	12
UAS DNT2RNAi /+,Oregon	13
UAS DNT2RNAi /+,Oregon	15
UAS DNT2RNAi /+,Oregon	7
UAS DNT2RNAi /+,Oregon	6
UAS DNT2RNAi /+,Oregon	7
UAS DNT2RNAi /+,Oregon	9
UAS DNT2RNAi /+,Oregon	5
