# Supplementary material for: A neurotrophin functioning with a Toll regulates structural plasticity in a dopaminergic circuit
Source: eLife. 2024 Dec 20;13:RP102222. doi: 10.7554/eLife.102222 (PMC11661795; doi:10.7554/eLife.102222)
Supplement: Figure 6—figure supplement 2—source data 3. [file elife-102222-fig6-figsupp2-data3.xlsx]

## Sheet: Sheet1
Figure 6 figure supplement 2 source data 3 Altering DNT-2 levels induced seizures.
Data used to generate graphs in Figure 6 figure supplement 2: bang-sensitivity test				See Supplementary File 2.
Right: tubGal80ts DNT-2Gal4>DNT-2FL
Genotype	recovery time (s)
tubGal80ts/+; DNT2Gal4/+ (Oregon)	6
tubGal80ts/+; DNT2Gal4/+ (Oregon)	7
tubGal80ts/+; DNT2Gal4/+ (Oregon)	8
tubGal80ts/+; DNT2Gal4/+ (Oregon)	7
tubGal80ts/+; DNT2Gal4/+ (Oregon)	7
tubGal80ts/+; DNT2Gal4/+ (Oregon)	16
tubGal80ts/+; DNT2Gal4/+ (Oregon)	9
tubGal80ts/+; DNT2Gal4/+ (Oregon)	24
tubGal80ts/+; DNT2Gal4/+ (Oregon)	9
tubGal80ts/+; DNT2Gal4/+ (Oregon)	11
tubGal80ts/+; DNT2Gal4/+ (Oregon)	12
tubGal80ts DNT2Gal4/UAS DNT2FL	12
tubGal80ts DNT2Gal4/UAS DNT2FL	14
tubGal80ts DNT2Gal4/UAS DNT2FL	25
tubGal80ts DNT2Gal4/UAS DNT2FL	18
tubGal80ts DNT2Gal4/UAS DNT2FL	19
tubGal80ts DNT2Gal4/UAS DNT2FL	7
tubGal80ts DNT2Gal4/UAS DNT2FL	19
tubGal80ts DNT2Gal4/UAS DNT2FL	15
tubGal80ts DNT2Gal4/UAS DNT2FL	5
tubGal80ts DNT2Gal4/UAS DNT2FL	9
tubGal80ts DNT2Gal4/UAS DNT2FL	5
tubGal80ts DNT2Gal4/UAS DNT2FL	5
tubGal80ts DNT2Gal4/UAS DNT2FL	8
tubGal80ts DNT2Gal4/UAS DNT2FL	5
tubGal80ts DNT2Gal4/UAS DNT2FL	7
tubGal80ts DNT2Gal4/UAS DNT2FL	30
tubGal80ts DNT2Gal4/UAS DNT2FL	8
tubGal80ts DNT2Gal4/UAS DNT2FL	7
tubGal80ts DNT2Gal4/UAS DNT2FL	6
tubGal80ts DNT2Gal4/UAS DNT2FL	8
tubGal80ts DNT2Gal4/UAS DNT2FL	6
tubGal80ts DNT2Gal4/UAS DNT2FL	12
tubGal80ts DNT2Gal4/UAS DNT2FL	33
tubGal80ts DNT2Gal4/UAS DNT2FL	7
tubGal80ts DNT2Gal4/UAS DNT2FL	8
tubGal80ts DNT2Gal4/UAS DNT2FL	9
tubGal80ts DNT2Gal4/UAS DNT2FL	5
