# Supplementary material for: A neurotrophin functioning with a Toll regulates structural plasticity in a dopaminergic circuit
Source: eLife. 2024 Dec 20;13:RP102222. doi: 10.7554/eLife.102222 (PMC11661795; doi:10.7554/eLife.102222)
Supplement: Figure 6—source data 1. [file elife-102222-fig6-data1.xlsx]

## Sheet: Figure 6A source data 1
Sun et al A neurotrophin funcitoning with a Toll regulates structural plasticity in a dopaminergic circuit
Figure 6A left. Impaired climbing in DNT-2 mutants							Figure 6A right Impaired climbing upon adult specific DNT-2-RNAi knock-down
Data used to generate graph in Figure 6A left: climbing assay or SING or negative geotaxis test							Data used to generate graph in Figure 6A right: climbing assay or SING or negative geotaxis test
Group	Genotype	No. of flies (ntot)	Mean-bottom	Mean-top	P.I. in graph		Groups	Genotype	No. of flies (ntot)	Mean-bottom	Mean-top	P.I. in graph
Group 1	Canton-S (wt)	10	0.25	2.75	0.625		Group 1	wt (Oregon)	7	0.1428	6.5714	0.95929
Group 2	Canton-S (wt)	10	1.25	3.5	0.6125		Group 2	wt (Oregon)	3	0	2	0.833333
Group 3	Canton-S (wt)	10	1.5	1.25	0.4875		Group 3	wt (Oregon)	9	0.25	7.375	0.89583
							Group 4	wt (Oregon)	8	0.875	6.25	0.83594
Group 1	DNT2[37]/ DNT2[18]	9	2.5	0	0.3611		Group 5	wt (Oregon)	9	0.125	8.125	0.94444
Group 2	DNT2[37]/ DNT2[18]	10	2.75	1	0.4125		Group 6	wt (Oregon)	12	0.125	9.625	0.89583
Group 3	DNT2[37]/ DNT2[18]	10	3.5	0.5	0.35
Group 4	DNT2[37]/ DNT2[18]	10	2.5	1	0.425		Group 1	tubGal80ts DNT2Gal4/+ (Oregon)	10	0.333	5	0.7333
Group 5	DNT2[37]/ DNT2[18]	10	2	1	0.45		Group 2	tubGal80ts DNT2Gal4/+ (Oregon)	10	0	4.333	0.71666
							Group 3	tubGal80ts DNT2Gal4/+ (Oregon)	10	0.666	5.333	0.7333
P.I.=performance index							Group 4	tubGal80ts DNT2Gal4/+ (Oregon)	9	0	3.666	0.7037
See Supplementary File 2.							Group 5	tubGal80ts DNT2Gal4/+ (Oregon)	10	0	6.666	0.8333
							Group 6	tubGal80ts DNT2Gal4/+ (Oregon)	10	3.333	8.666	0.7666
							Group 7	tubGal80ts DNT2Gal4/+ (Oregon)	9	1.666	5.666	0.72222
							Group 8	tubGal80ts DNT2Gal4/+ (Oregon)	9	2.666	7.666	0.7777
							Group 9	tubGal80ts DNT2Gal4/+ (Oregon)	10	2.333	6.333	0.7
							Group 10	tubGal80ts DNT2Gal4/+ (Oregon)	10	2.333	8.333	0.8
							Group 11	tubGal80ts DNT2Gal4/+ (Oregon)	9	0	6	0.8333
							Group 12	tubGal80ts DNT2Gal4/+ (Oregon)	10	0	7.333	0.8666
							Group 13	tubGal80ts DNT2Gal4/+ (Oregon)	10	0	5.333	0.7666
							Group 14	tubGal80ts DNT2Gal4/+ (Oregon)	10	0	3.666	0.68333
							Group 15	tubGal80ts DNT2Gal4/+ (Oregon)	10	0	6	0.8
							Group 16	tubGal80ts DNT2Gal4/+ (Oregon)	9	0	7	0.888
							Group 17	tubGal80ts DNT2Gal4/+ (Oregon)	9	0	4	0.7222
							Group 18	tubGal80ts DNT2Gal4/+ (Oregon)	10	0.333	4.333	0.7
							Group 19	tubGal80ts DNT2Gal4/+ (Oregon)	7	0	3.666	0.7619
							Group 20	tubGal80ts DNT2Gal4/+ (Oregon)	10	0.333	5	0.7333
							Group 1	tubGal80ts DNT2Gal4/UAS DNT2RNAi	10	0.333	4.666	0.71666
							Group 2	tubGal80ts DNT2Gal4/UAS DNT2RNAi	10	0.333	2.666	0.6166
							Group 3	tubGal80ts DNT2Gal4/UAS DNT2RNAi	10	0	4.333	0.71666
							Group 4	tubGal80ts DNT2Gal4/UAS DNT2RNAi	10	0.333	2.333	0.6
							Group 5	tubGal80ts DNT2Gal4/UAS DNT2RNAi	10	0	4.333	0.71666
							Group 6	tubGal80ts DNT2Gal4/UAS DNT2RNAi	10	2	4.666	6.333
							Group 7	tubGal80ts DNT2Gal4/UAS DNT2RNAi	10	3.333	6.666	0.6666
							Group 8	tubGal80ts DNT2Gal4/UAS DNT2RNAi	10	1.666	3.666	0.6
							Group 9	tubGal80ts DNT2Gal4/UAS DNT2RNAi	10	1.666	4	0.61666
							Group 10	tubGal80ts DNT2Gal4/UAS DNT2RNAi	10	2.666	6	0.666
							Group 11	tubGal80ts DNT2Gal4/UAS DNT2RNAi	9	0	3.666	0.7037
							Group 12	tubGal80ts DNT2Gal4/UAS DNT2RNAi	10	0.333	6	0.78333
							Group 13	tubGal80ts DNT2Gal4/UAS DNT2RNAi	10	0	3.666	0.6333
							Group 14	tubGal80ts DNT2Gal4/UAS DNT2RNAi	10	0.333	3.333	0.65
							Group 15	tubGal80ts DNT2Gal4/UAS DNT2RNAi	9	0.666	5.666	0.7777
							Group 16	tubGal80ts DNT2Gal4/UAS DNT2RNAi	11	0.333	5.666	0.7424
							Group 17	tubGal80ts DNT2Gal4/UAS DNT2RNAi	9	0	4	0.7222
							Group 1	UASDNT2RNAi/+ (Oregon)	8	0	7.333	0.958333
							Group 2	UASDNT2RNAi/+ (Oregon)	10	0	9.333	0.9666
							Group 3	UASDNT2RNAi/+ (Oregon)	7	0	0.666	0.976
							Group 4	UASDNT2RNAi/+ (Oregon)	9	0	8.666	0.98148
							Group 5	UASDNT2RNAi/+ (Oregon)	8	0	7	0.9375
							Group 6	UASDNT2RNAi/+ (Oregon)	9	0	8.333	0.96396
							Group 7	UASDNT2RNAi/+ (Oregon)	10	0	9.333	0.966
							P.I.=performance index
							See Supplementary File 2.
