# Supplementary material for: A neurotrophin functioning with a Toll regulates structural plasticity in a dopaminergic circuit
Source: eLife. 2024 Dec 20;13:RP102222. doi: 10.7554/eLife.102222 (PMC11661795; doi:10.7554/eLife.102222)
Supplement: Figure 6—source data 2. [file elife-102222-fig6-data2.xlsx]

## Sheet: Figure 6B source data 2
Figure 6B left Impaired climbing upon adult specific Toll-6-RNAi knock-down in Toll-6 cells							Figure 6B right Impaired climbing upon adult specific Toll-6-RNAi knock-down in PAMs
Data used to generate graph in Figure 6B left: climbing assay or SING or negative geotaxis test.							Data used to generate graph in Figure 6B right: climbing assay or SING or negative geotaxis test
Groups	Genotype	No. of flies (ntot)	Mean bot <2cm	Mean-Top >13cm	P.I. in graph		Groups	Genotype	No. of flies (ntot)	Mean bot <2cm	Mean-Top >13cm	P.I. in graph
Group 1	tubGAL80ts Toll-6GAL4/+ (Oregon)	12	0.1429	10.2857	0.9233		Group 1	tubGAL80tsR58E02GAL4/+ (Oregon)	5	1	3.4285	0.742857
Group 2	tubGAL80ts Toll-6GAL4/+ (Oregon)	4	0.375	3.25	0.85938		Group 2	tubGAL80tsR58E02GAL4/+ (Oregon)	1	0.7142	1.1428	0.857143
Group 3	tubGAL80ts Toll-6GAL4/+ (Oregon)	2	0.1429	1.57143	0.85714		Group 3	tubGAL80tsR58E02GAL4/+ (Oregon)	1	0.143	0.1428	0.5
Group 4	tubGAL80ts Toll-6GAL4/+ (Oregon)	1	0	0.8514	0.9285		Group 4	tubGAL80tsR58E02GAL4/+ (Oregon)	7	0.5714	2.4285	0.632653
Group 5	tubGAL80ts Toll-6GAL4/+ (Oregon)	1	0	0.375	0.6875
Group 6	tubGAL80ts Toll-6GAL4/+ (Oregon)	2	0	1.25	0.8125		Group 1	tubGAL80tsR58E02GAL4>Toll-6RNAi, kek-6RNAi	8	1.5	2.8333	0.583333
							Group 2	tubGAL80tsR58E02GAL4>Toll-6RNAi, kek-6RNAi	1	0.1428	0.5714	0.714286
Group 1	tubGAL80ts Toll-6GAL4>Toll-6RNAi, kek-6RNAi	7	1.71429	4.5714	0.7142		Group 3	tubGAL80tsR58E02GAL4>Toll-6RNAi, kek-6RNAi	4	1.1428	0.4285	0.410714
Group 2	tubGAL80ts Toll-6GAL4>Toll-6RNAi, kek-6RNAi	3	0	2.125	0.8541		Group 4	tubGAL80tsR58E02GAL4>Toll-6RNAi, kek-6RNAi	4	1.857	1.428	0.446429
Group 3	tubGAL80ts Toll-6GAL4>Toll-6RNAi, kek-6RNAi	13	1.714	7.14286	0.7088		Group 5	tubGAL80tsR58E02GAL4>Toll-6RNAi, kek-6RNAi	2	0.4286	0.7142	0.571429
Group 4	tubGAL80ts Toll-6GAL4>Toll-6RNAi, kek-6RNAi	2	0.7143	0.7149	0.5		Group 6	tubGAL80tsR58E02GAL4>Toll-6RNAi, kek-6RNAi	8	1.71428	3	0.580357
Group 5	tubGAL80ts Toll-6GAL4>Toll-6RNAi, kek-6RNAi	4	1.125	1.875	0.59375
							Group 1	UAS-kek-6RNAi/+; UAS-Toll-6RNAi/+ (Oregon)	8	0.57	5.7142	0.821518
Group 1	UAS-kek-6RNAi/+; UAS-Toll-6RNAi/+ (Oregon)	9	0.571	7.1428	0.887756		Group 2	UAS-kek-6RNAi/+; UAS-Toll-6RNAi/+ (Oregon)	8	0.5714	5.4285	0.807143
Group 2	UAS-kek-6RNAi/+; UAS-Toll-6RNAi/+ (Oregon)	2	0	1.75	0.9375
Group 3	UAS-kek-6RNAi/+; UAS-Toll-6RNAi/+ (Oregon)	9	0.571429	7.14	0.865079		P.I.=performance index
							See Supplementary File 2.
P.I.=performance index
See Supplementary File 2.
