# Supplementary material for: A neurotrophin functioning with a Toll regulates structural plasticity in a dopaminergic circuit
Source: eLife. 2024 Dec 20;13:RP102222. doi: 10.7554/eLife.102222 (PMC11661795; doi:10.7554/eLife.102222)
Supplement: Figure 6—source data 3. [file elife-102222-fig6-data3.xlsx]

## Sheet: Figure 6 source data 3
Figure 6C Overexpression of Toll-6 rescued the climbing impairment of DNT-2 mutants
Data used to generate graph in Figure 6C: climbing assay or SING or negative geotaxis test
Groups	Genotype	No. of flies (ntot)	Mean bot <2cm	Mean-Top >13cm	P.I. in graph
Group 1	THG4 R58E02G4 DNT-2[18]/+ (Oregon)	8	0.5714	6.571	0.875
Group 2	THG4 R58E02G4 DNT-2[18]/+ (Oregon)	12	0.2857	7.2857	0.791667
Group 3	THG4 R58E02G4 DNT-2[18]/+ (Oregon)	4	0.5714	2.1428	0.69714
Group 4	THG4 R58E02G4 DNT-2[18]/+ (Oregon)	7	1.5714	3.4285	0.632653
Group 5	THG4 R58E02G4 DNT-2[18]/+ (Oregon)	13	0.5714	9.4285	0.84066
Group 1	THGAL4 R58E02GAL4 DNT-2[18]/DNT-2[37]	8	5.8125	0.6875	0.17969
Group 2	THGAL4 R58E02GAL4 DNT-2[18]/DNT-2[37]	10	3	4.1428	0.557142
Group 3	THGAL4 R58E02GAL4 DNT-2[18]/DNT-2[37]	8	0.5714	5.5714	0.812473
Group 4	THGAL4 R58E02GAL4 DNT-2[18]/DNT-2[37]	2	0.1428	1.2857	0.78571
Group 1	THGAL4 R58E02GAL4 DNT-2[18]/UAS-Toll-6[CY] DNT-2[37]	4	0.25	2.25	0.75
Group 2	THGAL4 R58E02GAL4 DNT-2[18]/UAS-Toll-6[CY] DNT-2[37]	5	0.4285	3.8571	0.842857
Group 3	THGAL4 R58E02GAL4 DNT-2[18]/UAS-Toll-6[CY] DNT-2[37]	3	0.4285	1.4285	0.666667
Group 4	THGAL4 R58E02GAL4 DNT-2[18]/UAS-Toll-6[CY] DNT-2[37]	11	1.7142	7.8571	0.779221
Group 5	THGAL4 R58E02GAL4 DNT-2[18]/UAS-Toll-6[CY] DNT-2[37]	2	1.1428	0.71428	0.392857
Group 6	THGAL4 R58E02GAL4 DNT-2[18]/UAS-Toll-6[CY] DNT-2[37]				0.928571
Group 7	THGAL4 R58E02GAL4 DNT-2[18]/UAS-Toll-6[CY] DNT-2[37]	2	0.2857	1.7142	0.85714
Group 1	DNT-2[37]/ DNT-2[18]	5	0.333	2	0.66667
Group 2	DNT-2[37]/ DNT-2[18]	5	2.1428	2.4285	0.528571
Group 3	DNT-2[37]/ DNT-2[18]	9	2.5	0	0.36111
Group 4	DNT-2[37]/ DNT-2[18]	10	2.75	1	0.4125
Group 5	DNT-2[37]/ DNT-2[18]	10	3.5	0.5	0.35
Group 6	DNT-2[37]/ DNT-2[18]	10	2.5	1	0.425
Group 7	DNT-2[37]/ DNT-2[18]	10	2	1	0.45
P.I.=performance index
See Supplementary File 2.
