# Supplementary material for: A neurotrophin functioning with a Toll regulates structural plasticity in a dopaminergic circuit
Source: eLife. 2024 Dec 20;13:RP102222. doi: 10.7554/eLife.102222 (PMC11661795; doi:10.7554/eLife.102222)
Supplement: Figure 6—source data 4. [file elife-102222-fig6-data4.xlsx]

## Sheet: Figure 6 source data 4 
Figure 6D Locomotion in an arena: over-expression of Toll-6[CY} improves locomotion
Freely moving flies in an open arena, tracking and locomotion measurements. See Supplementary File 2.
Data used to generate graphs in Figure 6D	Locomotion in arena
	Figure 6D left	Figure 6D middle	Figure 6D right
Genotype	Walking_speed mm/s	Walked Distance/mm	Immobile_Time
w;THGa14, R58E02Gal4, DNT2[18]/+	14.49	1813.2	25.04
w;THGa14, R58E02Gal4, DNT2[18]/+	12.33	1001.04	68.98
w;THGa14, R58E02Gal4, DNT2[18]/+	11.11	487.59	106.3
w;THGa14, R58E02Gal4, DNT2[18]/+	11.22	1086.24	53.36
w;THGa14, R58E02Gal4, DNT2[18]/+	10.94	781.28	78.74
w;THGa14, R58E02Gal4, DNT2[18]/+	11.41	1195.33	45.38
w;THGa14, R58E02Gal4, DNT2[18]/+	11.79	1340.56	36.52
w;THGa14, R58E02Gal4, DNT2[18]/+	11.56	1195.05	46.8
w;THGa14, R58E02Gal4, DNT2[18]/+	12.04	1358.41	37.36
w;THGa14, R58E02Gal4, DNT2[18]/+	12.49	1521.75	28.38
w;THGa14, R58E02Gal4, DNT2[18]/+	11.51	713.59	88.18
w;THGa14, R58E02Gal4, DNT2[18]/+	12.7	1356.56	43.4
w;THGa14, R58E02Gal4, DNT2[18]/+	13.59	784.16	92.46
w;THGa14, R58E02Gal4, DNT2[18]/+	11.8	1188.15	49.46
w;THGa14, R58E02Gal4, DNT2[18]/+	9.6	111.94	138.52
w;THGa14, R58E02Gal4, DNT2[18]/+	8.4	5.04	149.58
w;THGa14, R58E02Gal4, DNT2[18]/+	12.47	1541.17	26.6
w;THGa14, R58E02Gal4, DNT2[18]/+	12.89	1614.96	24.94
w;THGa14, R58E02Gal4, DNT2[18]/+	7.69	945.39	176.96
w;THGa14, R58E02Gal4, DNT2[18]/+	8.12	1100.72	164.32
w;THGa14, R58E02Gal4, DNT2[18]/+	6.29	562.22	210.56
w;THGa14, R58E02Gal4, DNT2[18]/+	6.93	688.04	200.68
w;THGa14, R58E02Gal4, DNT2[18]/+	7.43	355.9	252
w;THGa14, R58E02Gal4, DNT2[18]/+	7.15	1203.87	131.56
w;THGa14, R58E02Gal4, DNT2[18]/+	7.17	1301.01	118.48
w;THGa14, R58E02Gal4, DNT2[18]/+	5.49	77.47	285.8
w;THGa14, R58E02Gal4, DNT2[18]/+	7.41	954.89	171.04
w;THGa14, R58E02Gal4, DNT2[18]/+	7.61	759.59	200.12
w;THGa14, R58E02Gal4, DNT2[18]/+	6.74	409.22	239.2
w;THGa14, R58E02Gal4, DNT2[18]/+	6.33	498.98	221.12
w;THGa14, R58E02Gal4, DNT2[18]/+	7.43	760.68	197.56
w;THGa14, R58E02Gal4, DNT2[18]/+	8.89	1426.32	139.48
w;THGa14, R58E02Gal4, DNT2[18]/+	7.97	1300.36	136.68
w;THGa14, R58E02Gal4, DNT2[18]/+	8.03	1000.14	175.4
w;THGa14, R58E02Gal4, DNT2[18]/+	7.2	788.79	190.36
w;THGa14, R58E02Gal4, DNT2[18]/+	7.48	1102.48	152.56
w;THGa14, R58E02Gal4, DNT2[18]/+	6.53	792.41	178.64
w;THGa14, R58E02Gal4, DNT2[18]/+	6.52	639.13	201.84
w;THGa14, R58E02Gal4, DNT2[18]/+	7.1	410.12	242.16
w;THGa14, R58E02Gal4, DNT2[18]/+	7.86	1244.69	141.64
w;THGa14, R58E02Gal4, DNT2[18]/+	8.09	1243.44	146.24
w;THGa14, R58E02Gal4, DNT2[18]/+	7.25	1114.23	146.28
w;THGa14, R58E02Gal4, DNT2[18]/+	6.86	279.15	259.2
w;THGa14, R58E02Gal4, DNT2[18]/+	6.9	1141.53	134.6
w;THGa14, R58E02Gal4, DNT2[18]/+	6.6	489.08	225.8
w;THGa14, R58E02Gal4, DNT2[18]/+	7.23	1281.64	122.64
w;THGa14, R58E02Gal4, DNT2[18]/+	6.36	358.19	243.64
w;THGa14, R58E02Gal4, DNT2[18]/+	7.2	1267.26	124
w;THGa14, R58E02Gal4, DNT2[18]/+	5.99	43.61	292.64
w;THGa14, R58E02Gal4, DNT2[18]/+	6.92	99.35	285.56
w;THGa14, R58E02Gal4, DNT2[18]/+	6.36	371.41	241.56
w;THGa14, R58E02Gal4, DNT2[18]/+	6.68	1081.83	137.92
w;THGa14, R58E02Gal4, DNT2[18]/+	7.26	1146.55	142.04
w;THGa14, R58E02Gal4, DNT2[18]/+	6.96	1101.92	141.56
w;THGa14, R58E02Gal4, DNT2[18]/+	11.34	2629.77	67.96
w;THGa14, R58E02Gal4, DNT2[18]/+	10.49	2378.91	73.08
w;THGa14, R58E02Gal4, DNT2[18]/+	10.33	2372.7	70.24
w;THGa14, R58E02Gal4, DNT2[18]/+	8.02	1496.38	113.28
w;THGa14, R58E02Gal4, DNT2[18]/+	9.25	1818.76	103.4
w;THGa14, R58E02Gal4, DNT2[18]/+	7.72	1260.76	136.56
w;THGa14, R58E02Gal4, DNT2[18]/+	9.58	2122.81	78.28
w;THGa14, R58E02Gal4, DNT2[18]/+	6.87	828.9	179.28
w;THGa14, R58E02Gal4, DNT2[18]/+	9.39	1898.38	97.8
w; UASToll-6[CY]/+; DNT2[37]/+	6.89	1099.3	140.28
w; UASToll-6[CY]/+; DNT2[37]/+	7.8	1236.02	141.44
w; UASToll-6[CY]/+; DNT2[37]/+	6.74	620.83	207.76
w; UASToll-6[CY]/+; DNT2[37]/+	6.33	260.45	258.76
w; UASToll-6[CY]/+; DNT2[37]/+	6.61	718.12	191.24
w; UASToll-6[CY]/+; DNT2[37]/+	6.35	827.5	169.52
w; UASToll-6[CY]/+; DNT2[37]/+	7.79	1387.48	121.72
w; UASToll-6[CY]/+; DNT2[37]/+	7.49	1081.85	155.4
w; UASToll-6[CY]/+; DNT2[37]/+	6.87	967.05	159.24
w; UASToll-6[CY]/+; DNT2[37]/+	10.7	665.24	87.98
w; UASToll-6[CY]/+; DNT2[37]/+	7.83	194.22	125.36
w; UASToll-6[CY]/+; DNT2[37]/+	10.01	1030.85	47.18
w; UASToll-6[CY]/+; DNT2[37]/+	7.57	126.52	133.46
w; UASToll-6[CY]/+; DNT2[37]/+	11.3	1042.19	57.96
w; UASToll-6[CY]/+; DNT2[37]/+	10.14	760.82	75.14
w; UASToll-6[CY]/+; DNT2[37]/+	10.02	440.77	106.18
w; UASToll-6[CY]/+; DNT2[37]/+	12.38	1283.2	46.5
w; UASToll-6[CY]/+; DNT2[37]/+	10.03	978.41	52.6
w; UASToll-6[CY]/+; DNT2[37]/+	6.01	357.03	240.56
w; UASToll-6[CY]/+; DNT2[37]/+	7.05	849.64	179.32
w; UASToll-6[CY]/+; DNT2[37]/+	6.87	1114.11	137.84
w; UASToll-6[CY]/+; DNT2[37]/+	6.69	518.37	222.48
w; UASToll-6[CY]/+; DNT2[37]/+	6.24	218.42	264.92
w; UASToll-6[CY]/+; DNT2[37]/+	6.2	765.62	176.36
w; UASToll-6[CY]/+; DNT2[37]/+	6.28	171.47	272.6
w; UASToll-6[CY]/+; DNT2[37]/+	6.08	693.14	185.88
w; UASToll-6[CY]/+; DNT2[37]/+	5.68	322.7	243.08
w; UASToll-6[CY]/+; DNT2[37]/+	6.01	301.93	249.68
w; UASToll-6[CY]/+; DNT2[37]/+	6.04	437.16	227.6
w; UASToll-6[CY]/+; DNT2[37]/+	5.72	209.99	263.24
w; UASToll-6[CY]/+; DNT2[37]/+	7.29	9.91	298.56
w; UASToll-6[CY]/+; DNT2[37]/+	5.43	152.45	271.84
w; UASToll-6[CY]/+; DNT2[37]/+	5.85	48.4	291.64
w; UASToll-6[CY]/+; DNT2[37]/+	5.37	193.25	263.96
w; UASToll-6[CY]/+; DNT2[37]/+	6.01	4.08	299.24
w; UASToll-6[CY]/+; DNT2[37]/+	5.33	30.89	294.12
w; UASToll-6[CY]/+; DNT2[37]/+	8.6	1645.47	108.56
w; UASToll-6[CY]/+; DNT2[37]/+	6.99	1010.6	155.4
w; UASToll-6[CY]/+; DNT2[37]/+	7.27	776.84	193.04
w; UASToll-6[CY]/+; DNT2[37]/+	9.98	2242.06	75.32
w; UASToll-6[CY]/+; DNT2[37]/+	9.22	1932.12	90.4
w; UASToll-6[CY]/+; DNT2[37]/+	8.1	1435.59	122.64
w; UASToll-6[CY]/+; DNT2[37]/+	8.19	1443.8	123.68
w; UASToll-6[CY]/+; DNT2[37]/+	7.43	1376.22	114.64
w; UASToll-6[CY]/+; DNT2[37]/+	7.22	133.99	281.36
w; UASToll-6[CY]/+; DNT2[37]/+	7.4	1197.16	138.16
w; UASToll-6[CY]/+; DNT2[37]/+	7.43	472.71	236.32
w; UASToll-6[CY]/+; DNT2[37]/+	6.74	874.92	170.12
w; UASToll-6[CY]/+; DNT2[37]/+	6.26	937.7	150.08
w; UASToll-6[CY]/+; DNT2[37]/+	6.13	857.47	160.08
w; UASToll-6[CY]/+; DNT2[37]/+	6.79	1067.65	142.68
w; UASToll-6[CY]/+; DNT2[37]/+	6.73	846.87	174
w; UASToll-6[CY]/+; DNT2[37]/+	6.31	402.64	236.16
w; UASToll-6[CY]/+; DNT2[37]/+	6.74	832.32	176.36
w; UASToll-6[CY]/+; DNT2[37]/+	6.96	1011.91	154.48
w; UASToll-6[CY]/+; DNT2[37]/+	6.18	464.11	224.84
w; UASToll-6[CY]/+; DNT2[37]/+	6.82	691.29	198.56
w;UASToll-6[CY]/+; THGa14 R58E02Gal4 DNT2[18] / DNT2[37]	8.36	1854.98	78.12
w;UASToll-6[CY]/+; THGa14 R58E02Gal4 DNT2[18] / DNT2[37]	8.74	1741.67	100.64
w;UASToll-6[CY]/+; THGa14 R58E02Gal4 DNT2[18] / DNT2[37]	7.92	1359.62	128.24
w;UASToll-6[CY]/+; THGa14 R58E02Gal4 DNT2[18] / DNT2[37]	6.98	828.9	181.24
w;UASToll-6[CY]/+; THGa14 R58E02Gal4 DNT2[18] / DNT2[37]	7.9	1441.58	117.48
w;UASToll-6[CY]/+; THGa14 R58E02Gal4 DNT2[18] / DNT2[37]	7.95	1450.18	117.52
w;UASToll-6[CY]/+; THGa14 R58E02Gal4 DNT2[18] / DNT2[37]	7.48	975.83	169.52
w;UASToll-6[CY]/+; THGa14 R58E02Gal4 DNT2[18] / DNT2[37]	7.09	1354.03	109.04
w;UASToll-6[CY]/+; THGa14 R58E02Gal4 DNT2[18] / DNT2[37]	8.54	1696.62	101.16
w;UASToll-6[CY]/+; THGa14 R58E02Gal4 DNT2[18] / DNT2[37]	8.81	1833.69	91.84
w;UASToll-6[CY]/+; THGa14 R58E02Gal4 DNT2[18] / DNT2[37]	8.7	1791.84	94
w;UASToll-6[CY]/+; THGa14 R58E02Gal4 DNT2[18] / DNT2[37]	8.51	1446.21	129.88
w;UASToll-6[CY]/+; THGa14 R58E02Gal4 DNT2[18] / DNT2[37]	7.88	1273.64	138.2
w;UASToll-6[CY]/+; THGa14 R58E02Gal4 DNT2[18] / DNT2[37]	8.23	1670.15	96.92
w;UASToll-6[CY]/+; THGa14 R58E02Gal4 DNT2[18] / DNT2[37]	7.46	1409.51	111.04
w;UASToll-6[CY]/+; THGa14 R58E02Gal4 DNT2[18] / DNT2[37]	8.43	1705.9	97.48
w;UASToll-6[CY]/+; THGa14 R58E02Gal4 DNT2[18] / DNT2[37]	8.14	1739.48	86.24
w;UASToll-6[CY]/+; THGa14 R58E02Gal4 DNT2[18] / DNT2[37]	7.73	1343.55	126.04
w;UASToll-6[CY]/+; THGa14 R58E02Gal4 DNT2[18] / DNT2[37]	7.89	1482.02	112
w;UASToll-6[CY]/+; THGa14 R58E02Gal4 DNT2[18] / DNT2[37]	7.26	1205.11	134
w;UASToll-6[CY]/+; THGa14 R58E02Gal4 DNT2[18] / DNT2[37]	7.54	1465.83	105.48
w;UASToll-6[CY]/+; THGa14 R58E02Gal4 DNT2[18] / DNT2[37]	9.45	1853.88	103.72
w;UASToll-6[CY]/+; THGa14 R58E02Gal4 DNT2[18] / DNT2[37]	8.54	1674.62	103.72
w;UASToll-6[CY]/+; THGa14 R58E02Gal4 DNT2[18] / DNT2[37]	9.17	1831.08	100.24
w;UASToll-6[CY]/+; THGa14 R58E02Gal4 DNT2[18] / DNT2[37]	8.96	1783.78	100.76
w;UASToll-6[CY]/+; THGa14 R58E02Gal4 DNT2[18] / DNT2[37]	7.62	887.93	183.32
w;UASToll-6[CY]/+; THGa14 R58E02Gal4 DNT2[18] / DNT2[37]	8.22	1674.27	96.12
w;UASToll-6[CY]/+; THGa14 R58E02Gal4 DNT2[18] / DNT2[37]	10.35	2183.65	88.92
w;UASToll-6[CY]/+; THGa14 R58E02Gal4 DNT2[18] / DNT2[37]	8.93	1822.24	95.8
w;UASToll-6[CY]/+; THGa14 R58E02Gal4 DNT2[18] / DNT2[37]	9.55	1890.22	102.08
w;UASToll-6[CY]/+; THGa14 R58E02Gal4 DNT2[18] / DNT2[37]	8.9	1678.65	111.32
w;UASToll-6[CY]/+; THGa14 R58E02Gal4 DNT2[18] / DNT2[37]	7.48	1162.24	144.44
w;UASToll-6[CY]/+; THGa14 R58E02Gal4 DNT2[18] / DNT2[37]	8.58	1614.96	111.8
w;UASToll-6[CY]/+; THGa14 R58E02Gal4 DNT2[18] / DNT2[37]	8.47	1647.62	105.44
w;UASToll-6[CY]/+; THGa14 R58E02Gal4 DNT2[18] / DNT2[37]	9.21	1891.3	94.52
w;UASToll-6[CY]/+; THGa14 R58E02Gal4 DNT2[18] / DNT2[37]	8.91	1427.76	139.6
w;UASToll-6[CY]/+; THGa14 R58E02Gal4 DNT2[18] / DNT2[37]	9.02	2049.43	72.8
w;UASToll-6[CY]/+; THGa14 R58E02Gal4 DNT2[18] / DNT2[37]	8.65	1818.82	89.56
w;UASToll-6[CY]/+; THGa14 R58E02Gal4 DNT2[18] / DNT2[37]	8.62	1794.49	91.8
w;UASToll-6[CY]/+; THGa14 R58E02Gal4 DNT2[18] / DNT2[37]	14.44	2693.27	113.4
w;UASToll-6[CY]/+; THGa14 R58E02Gal4 DNT2[18] / DNT2[37]	12.15	2674.17	79.84
w;UASToll-6[CY]/+; THGa14 R58E02Gal4 DNT2[18] / DNT2[37]	13.08	2391.45	117.04
w;UASToll-6[CY]/+; THGa14 R58E02Gal4 DNT2[18] / DNT2[37]	9.09	1366.06	149.72
w;UASToll-6[CY]/+; THGa14 R58E02Gal4 DNT2[18] / DNT2[37]	7.68	1489.04	106
w;UASToll-6[CY]/+; THGa14 R58E02Gal4 DNT2[18] / DNT2[37]	8.99	1795.48	100.16
w;UASToll-6[CY]/+; THGa14 R58E02Gal4 DNT2[18] / DNT2[37]	8.29	1613.57	105.32
w;UASToll-6[CY]/+; THGa14 R58E02Gal4 DNT2[18] / DNT2[37]	8.54	1712.7	99.44
w;UASToll-6[CY]/+; THGa14 R58E02Gal4 DNT2[18] / DNT2[37]	8.11	1134.49	159.96
w;UASToll-6[CY]/+; THGa14 R58E02Gal4 DNT2[18] / DNT2[37]	9.14	1890.38	93.16
w;UASToll-6[CY]/+; THGa14 R58E02Gal4 DNT2[18] / DNT2[37]	9.39	1989.98	87.96
w;UASToll-6[CY]/+; THGa14 R58E02Gal4 DNT2[18] / DNT2[37]	9.29	1796.61	106.48
w;UASToll-6[CY]/+; THGa14 R58E02Gal4 DNT2[18] / DNT2[37]	9.74	2146.88	79.52
w;UASToll-6[CY]/+; THGa14 R58E02Gal4 DNT2[18] / DNT2[37]	9.08	2001.49	79.6
w;UASToll-6[CY]/+; THGa14 R58E02Gal4 DNT2[18] / DNT2[37]	10.33	2492.6	58.6
w;UASToll-6[CY]/+; THGa14 R58E02Gal4 DNT2[18] / DNT2[37]	8.79	1708.58	105.56
w;UASToll-6[CY]/+; THGa14 R58E02Gal4 DNT2[18] / DNT2[37]	7.89	1398.98	122.6
w;UASToll-6[CY]/+; THGa14 R58E02Gal4 DNT2[18] / DNT2[37]	8.45	1679.94	101.12
w; DNT-2[37]/DNT2[18]	8.76	1515.16	126.88
w; DNT-2[37]/DNT2[18]	8.82	1633.35	114.68
w; DNT-2[37]/DNT2[18]	5.66	4.98	299.04
w; DNT-2[37]/DNT2[18]	9.03	1840.57	96.2
w; DNT-2[37]/DNT2[18]	7.45	833.14	188.08
w; DNT-2[37]/DNT2[18]	7.7	906.58	182.2
w; DNT-2[37]/DNT2[18]	6.45	537.49	216.64
w; DNT-2[37]/DNT2[18]	5.74	288.24	249.68
w; DNT-2[37]/DNT2[18]	6.34	482.6	223.76
w; DNT-2[37]/DNT2[18]	13.23	1380.73	45.84
w; DNT-2[37]/DNT2[18]	10.73	661.4	88.56
w; DNT-2[37]/DNT2[18]	13.39	1295.13	53.48
w; DNT-2[37]/DNT2[18]	15.51	1938.4	25.24
w; DNT-2[37]/DNT2[18]	14.96	1782.16	31.06
w; DNT-2[37]/DNT2[18]	14.29	1459.27	48.08
w; DNT-2[37]/DNT2[18]	14.96	1266.1	65.56
w; DNT-2[37]/DNT2[18]	12.07	1162.4	53.86
w; DNT-2[37]/DNT2[18]	13.63	1216.46	60.94
w; DNT-2[37]/DNT2[18]	8.44	1405.54	133.4
w; DNT-2[37]/DNT2[18]	8.2	1498.02	117.28
w; DNT-2[37]/DNT2[18]	7.14	778.12	190.92
w; DNT-2[37]/DNT2[18]	8.27	1061.29	171.6
w; DNT-2[37]/DNT2[18]	7.03	632.92	209.84
w; DNT-2[37]/DNT2[18]	8.14	1093.06	165.56
w; DNT-2[37]/DNT2[18]	8.66	1444.65	133.12
w; DNT-2[37]/DNT2[18]	9.78	1672.98	128.84
w; DNT-2[37]/DNT2[18]	7.97	1208.31	148.32
w; DNT-2[37]/DNT2[18]	7.5	754.9	199.24
w; DNT-2[37]/DNT2[18]	8.38	1446.63	127.24
w; DNT-2[37]/DNT2[18]	7.92	1265.15	140.16
w; DNT-2[37]/DNT2[18]	8.19	1464.36	121.16
w; DNT-2[37]/DNT2[18]	8.17	1019.05	175.16
w; DNT-2[37]/DNT2[18]	7.7	752.73	202.12
w; DNT-2[37]/DNT2[18]	7.23	709.86	201.68
w; DNT-2[37]/DNT2[18]	8.42	744.95	211.4
w; DNT-2[37]/DNT2[18]	8.17	1153.24	158.76
w; DNT-2[37]/DNT2[18]	7.56	213.01	271.76
w; DNT-2[37]/DNT2[18]	7.64	405.79	246.84
w; DNT-2[37]/DNT2[18]	6.57	134.6	279.44
w; DNT-2[37]/DNT2[18]	9.19	1429.33	144.36
w; DNT-2[37]/DNT2[18]	8.34	1155.08	161.44
w; DNT-2[37]/DNT2[18]	9.61	833.02	213.2
w; DNT-2[37]/DNT2[18]	7.96	1245.61	143.48
w; DNT-2[37]/DNT2[18]	9.84	1979.63	98.68
w; DNT-2[37]/DNT2[18]	7.99	1224.61	146.6
w; DNT-2[37]/DNT2[18]	7.35	489.4	233.32
w; DNT-2[37]/DNT2[18]	6.51	649.93	200.08
w; DNT-2[37]/DNT2[18]	8.72	195.25	277.52
w; DNT-2[37]/DNT2[18]	9.17	1669.3	117.8
w; DNT-2[37]/DNT2[18]	9.01	1468.81	136.92
w; DNT-2[37]/DNT2[18]	8.22	1474.11	120.52
w; DNT-2[37]/DNT2[18]	8.56	1544.17	119.44
w; DNT-2[37]/DNT2[18]	8.28	1067.62	171.04
w; DNT-2[37]/DNT2[18]	8.4	1206.64	156.2
w; DNT-2[37]/DNT2[18]	7.84	1278.74	136.8
w; DNT-2[37]/DNT2[18]	8.58	1150.38	165.92
w; DNT-2[37]/DNT2[18]	8.16	1399.79	128.28
w; DNT-2[37]/DNT2[18]	10.56	2253.77	86.44
w; DNT-2[37]/DNT2[18]	8.84	1310.49	151.6
w; DNT-2[37]/DNT2[18]	9.69	1534.94	141.56
w; DNT-2[37]/DNT2[18]	8.6	1398.93	137.24
w; DNT-2[37]/DNT2[18]	7.97	723.1	209.24
w; DNT-2[37]/DNT2[18]	9.49	1403.08	152
