# Supplementary material for: A neurotrophin functioning with a Toll regulates structural plasticity in a dopaminergic circuit
Source: eLife. 2024 Dec 20;13:RP102222. doi: 10.7554/eLife.102222 (PMC11661795; doi:10.7554/eLife.102222)
Supplement: Figure 6—source data 5. [file elife-102222-fig6-data5.xlsx]

## Sheet: Figure 6 source data 5 
Figure 6E Locomotion in an arena upon DNT-2 over-expression
Freely behaving flies in an open arena, tracking and locomotion measurements.			See Supplementary File 2.
Data used to generate graph in Figure 6E
	Locomotion 30°C
Genotype	Walking_speed mm/s
tubGal80ts/+; DNT2Gal4/+ (Oregon)	6.68978
tubGal80ts/+; DNT2Gal4/+ (Oregon)	6.61605
tubGal80ts/+; DNT2Gal4/+ (Oregon)	6.29646
tubGal80ts/+; DNT2Gal4/+ (Oregon)	8.57944
tubGal80ts/+; DNT2Gal4/+ (Oregon)	6.41706
tubGal80ts/+; DNT2Gal4/+ (Oregon)	5.46988
tubGal80ts/+; DNT2Gal4/+ (Oregon)	5.34876
tubGal80ts/+; DNT2Gal4/+ (Oregon)	6.75961
tubGal80ts/+; DNT2Gal4/+ (Oregon)	5.51033
tubGal80ts/+; DNT2Gal4/+ (Oregon)	7.05646
tubGal80ts/+; DNT2Gal4/+ (Oregon)	5.44751
tubGal80ts/+; DNT2Gal4/+ (Oregon)	4.62761
tubGal80ts/+; DNT2Gal4/+ (Oregon)	4.23501
tubGal80ts/+; DNT2Gal4/+ (Oregon)	5.89045
tubGal80ts/+; DNT2Gal4/+ (Oregon)	6.70266
tubGal80ts/+; DNT2Gal4/+ (Oregon)	5.46017
tubGal80ts/+; DNT2Gal4/+ (Oregon)	5.77991
tubGal80ts/+; DNT2Gal4/+ (Oregon)	4.56662
tubGal80ts/+; DNT2Gal4/+ (Oregon)	5.8968
tubGal80ts/+; DNT2Gal4/+ (Oregon)	7.46462
tubGal80ts/+; DNT2Gal4/+ (Oregon)	7.74384
tubGal80ts/+; DNT2Gal4/+ (Oregon)	7.16991
tubGal80ts/+; DNT2Gal4/+ (Oregon)	7.93393
tubGal80ts/+; DNT2Gal4/+ (Oregon)	5.3922
tubGal80ts/+; DNT2Gal4/+ (Oregon)	6.97137
tubGal80ts/+; DNT2Gal4/+ (Oregon)	16.1628
tubGal80ts/+; DNT2Gal4/+ (Oregon)	8.85748
tubGal80ts/+; DNT2Gal4/+ (Oregon)	10.6009
tubGal80ts/+; DNT2Gal4/+ (Oregon)	5.60736
tubGal80ts/+; DNT2Gal4/+ (Oregon)	4.27889
tubGal80ts/+; DNT2Gal4/+ (Oregon)	5.58508
tubGal80ts/+; DNT2Gal4/+ (Oregon)	6.04596
tubGal80ts/+; DNT2Gal4/+ (Oregon)	5.37855
tubGal80ts/+; DNT2Gal4/+ (Oregon)	5.53546
tubGal80ts/+; DNT2Gal4/+ (Oregon)	7.60006
tubGal80ts/+; DNT2Gal4/+ (Oregon)	8.26636
tubGal80ts/+; DNT2Gal4/+ (Oregon)	8.30097
tubGal80ts/+; DNT2Gal4/+ (Oregon)	8.8981
tubGal80ts/+; DNT2Gal4/+ (Oregon)	4.2777
tubGal80ts/+; DNT2Gal4/+ (Oregon)	6.36285
tubGal80ts/+; DNT2Gal4/+ (Oregon)	7.11791
tubGal80ts/+; DNT2Gal4/+ (Oregon)	5.40606
tubGal80ts/+; DNT2Gal4/+ (Oregon)	5.20022
tubGal80ts/+; DNT2Gal4/+ (Oregon)	6.75471
tubGal80ts/+; DNT2Gal4/+ (Oregon)	5.28234
tubGal80ts/+; DNT2Gal4/+ (Oregon)	5.05054
tubGal80ts/+; DNT2Gal4/UASDNT2FL	7.62702
tubGal80ts/+; DNT2Gal4/UASDNT2FL	7.36977
tubGal80ts/+; DNT2Gal4/UASDNT2FL	8.22589
tubGal80ts/+; DNT2Gal4/UASDNT2FL	8.15241
tubGal80ts/+; DNT2Gal4/UASDNT2FL	8.18243
tubGal80ts/+; DNT2Gal4/UASDNT2FL	9.13748
tubGal80ts/+; DNT2Gal4/UASDNT2FL	9.18972
tubGal80ts/+; DNT2Gal4/UASDNT2FL	7.67433
tubGal80ts/+; DNT2Gal4/UASDNT2FL	8.87681
tubGal80ts/+; DNT2Gal4/UASDNT2FL	7.2874
tubGal80ts/+; DNT2Gal4/UASDNT2FL	7.41158
tubGal80ts/+; DNT2Gal4/UASDNT2FL	8.68388
tubGal80ts/+; DNT2Gal4/UASDNT2FL	7.86968
tubGal80ts/+; DNT2Gal4/UASDNT2FL	6.16549
tubGal80ts/+; DNT2Gal4/UASDNT2FL	8.42099
tubGal80ts/+; DNT2Gal4/UASDNT2FL	8.94792
tubGal80ts/+; DNT2Gal4/UASDNT2FL	7.45831
tubGal80ts/+; DNT2Gal4/UASDNT2FL	7.29323
tubGal80ts/+; DNT2Gal4/UASDNT2FL	8.30181
tubGal80ts/+; DNT2Gal4/UASDNT2FL	6.3674
tubGal80ts/+; DNT2Gal4/UASDNT2FL	5.54287
tubGal80ts/+; DNT2Gal4/UASDNT2FL	7.42203
tubGal80ts/+; DNT2Gal4/UASDNT2FL	5.54057
tubGal80ts/+; DNT2Gal4/UASDNT2FL	7.40988
tubGal80ts/+; DNT2Gal4/UASDNT2FL	26.8268
tubGal80ts/+; DNT2Gal4/UASDNT2FL	11.5589
tubGal80ts/+; DNT2Gal4/UASDNT2FL	8.57469
tubGal80ts/+; DNT2Gal4/UASDNT2FL	8.18617
tubGal80ts/+; DNT2Gal4/UASDNT2FL	8.29596
tubGal80ts/+; DNT2Gal4/UASDNT2FL	7.27784
tubGal80ts/+; DNT2Gal4/UASDNT2FL	7.34348
tubGal80ts/+; DNT2Gal4/UASDNT2FL	7.73895
tubGal80ts/+; DNT2Gal4/UASDNT2FL	6.9751
tubGal80ts/+; DNT2Gal4/UASDNT2FL	8.29408
tubGal80ts/+; DNT2Gal4/UASDNT2FL	8.34363
tubGal80ts/+; DNT2Gal4/UASDNT2FL	7.33297
tubGal80ts/+; DNT2Gal4/UASDNT2FL	10.3105
tubGal80ts/+; DNT2Gal4/UASDNT2FL	11.3993
tubGal80ts/+; DNT2Gal4/UASDNT2FL	10.2703
tubGal80ts/+; DNT2Gal4/UASDNT2FL	8.95735
tubGal80ts/+; DNT2Gal4/UASDNT2FL	10.3803
tubGal80ts/+; DNT2Gal4/UASDNT2FL	6.6422
tubGal80ts/+; DNT2Gal4/UASDNT2FL	4.94043
tubGal80ts/+; DNT2Gal4/UASDNT2FL	6.27422
tubGal80ts/+; DNT2Gal4/UASDNT2FL	4.45267
tubGal80ts/+; DNT2Gal4/UASDNT2FL	5.39
tubGal80ts/+; DNT2Gal4/UASDNT2FL	5.56921
tubGal80ts/+; DNT2Gal4/UASDNT2FL	6.66919
tubGal80ts/+; DNT2Gal4/UASDNT2FL	5.12435
tubGal80ts/+; DNT2Gal4/UASDNT2FL	10.1079
tubGal80ts/+; DNT2Gal4/UASDNT2FL	7.69472
tubGal80ts/+; DNT2Gal4/UASDNT2FL	8.21117
tubGal80ts/+; DNT2Gal4/UASDNT2FL	7.6279
tubGal80ts/+; DNT2Gal4/UASDNT2FL	8.34446
UAS-DNT2FL/+ (Oregon)	9.8582
UAS-DNT2FL/+ (Oregon)	12.5681
UAS-DNT2FL/+ (Oregon)	6.88469
UAS-DNT2FL/+ (Oregon)	7.16469
UAS-DNT2FL/+ (Oregon)	7.37773
UAS-DNT2FL/+ (Oregon)	6.41807
UAS-DNT2FL/+ (Oregon)	6.65907
UAS-DNT2FL/+ (Oregon)	5.25562
UAS-DNT2FL/+ (Oregon)	7.21816
UAS-DNT2FL/+ (Oregon)	5.79695
UAS-DNT2FL/+ (Oregon)	5.61832
UAS-DNT2FL/+ (Oregon)	5.7215
UAS-DNT2FL/+ (Oregon)	5.38051
UAS-DNT2FL/+ (Oregon)	6.04274
UAS-DNT2FL/+ (Oregon)	6.63305
UAS-DNT2FL/+ (Oregon)	5.30103
UAS-DNT2FL/+ (Oregon)	6.68427
UAS-DNT2FL/+ (Oregon)	4.26187
UAS-DNT2FL/+ (Oregon)	6.11472
UAS-DNT2FL/+ (Oregon)	4.9951
UAS-DNT2FL/+ (Oregon)	4.18703
UAS-DNT2FL/+ (Oregon)	6.91503
UAS-DNT2FL/+ (Oregon)	12.0958
UAS-DNT2FL/+ (Oregon)	6.87954
UAS-DNT2FL/+ (Oregon)	6.43443
UAS-DNT2FL/+ (Oregon)	4.57903
UAS-DNT2FL/+ (Oregon)	6.66381
UAS-DNT2FL/+ (Oregon)	4.84923
UAS-DNT2FL/+ (Oregon)	4.47372
UAS-DNT2FL/+ (Oregon)	6.01692
UAS-DNT2FL/+ (Oregon)	7.81941
UAS-DNT2FL/+ (Oregon)	9.62738
UAS-DNT2FL/+ (Oregon)	6.9078
