# Supplementary material for: A neurotrophin functioning with a Toll regulates structural plasticity in a dopaminergic circuit
Source: eLife. 2024 Dec 20;13:RP102222. doi: 10.7554/eLife.102222 (PMC11661795; doi:10.7554/eLife.102222)
Supplement: Figure 6—source data 6. [file elife-102222-fig6-data6.xlsx]

## Sheet: Figure 6 source data 6
Figure 6F Locomotion in an arena upon DNT-2neuron activation
Freely behaving flies in an open arean, tracking and locomotion measurements.
Data used to generate graph in Figure 6F
	Locomotion 30°C
Genotype	Walking_speed mm/s
DNT2Gal4/+ (Oregon)	5.68455
DNT2Gal4/+ (Oregon)	5.77972
DNT2Gal4/+ (Oregon)	5.4855
DNT2Gal4/+ (Oregon)	4.59685
DNT2Gal4/+ (Oregon)	5.27358
DNT2Gal4/+ (Oregon)	4.85727
DNT2Gal4/+ (Oregon)	7.00012
DNT2Gal4/+ (Oregon)	7.32651
DNT2Gal4/+ (Oregon)	4.58278
DNT2Gal4/+ (Oregon)	8.79035
DNT2Gal4/+ (Oregon)	7.40971
DNT2Gal4/+ (Oregon)	6.86941
DNT2Gal4/+ (Oregon)	5.25954
DNT2Gal4/+ (Oregon)	4.82204
DNT2Gal4/+ (Oregon)	4.78851
DNT2Gal4/+ (Oregon)	6.70955
DNT2Gal4/+ (Oregon)	7.12832
DNT2Gal4/+ (Oregon)	5.26889
DNT2Gal4/+ (Oregon)	5.69521
DNT2Gal4/+ (Oregon)	5.20995
DNT2Gal4/+ (Oregon)	5.64402
DNT2Gal4/+ (Oregon)	4.89817
DNT2Gal4/+ (Oregon)	4.62746
DNT2Gal4/+ (Oregon)	6.55166
DNT2Gal4/+ (Oregon)	6.34756
DNT2Gal4/+ (Oregon)	5.98109
DNT2Gal4/+ (Oregon)	6.44136
DNT2Gal4/+ (Oregon)	6.59734
DNT2Gal4/+ (Oregon)	6.19079
DNT2Gal4/+ (Oregon)	6.08247
DNT2Gal4/+ (Oregon)	7.6086
DNT2Gal4/+ (Oregon)	6.9121
DNT2Gal4/+ (Oregon)	8.95866
DNT2Gal4/+ (Oregon)	7.18643
DNT2Gal4/+ (Oregon)	4.70971
DNT2Gal4/+ (Oregon)	8.34912
DNT2Gal4/+ (Oregon)	5.27534
DNT2Gal4/+ (Oregon)	4.60517
DNT2Gal4/+ (Oregon)	5.59689
DNT2Gal4/+ (Oregon)	7.10632
DNT2Gal4/+ (Oregon)	6.52849
DNT2Gal4>UASdTrpA1	8.13813
DNT2Gal4>UASdTrpA1	8.07536
DNT2Gal4>UASdTrpA1	7.65947
DNT2Gal4>UASdTrpA1	7.06157
DNT2Gal4>UASdTrpA1	7.48474
DNT2Gal4>UASdTrpA1	8.48907
DNT2Gal4>UASdTrpA1	7.24948
DNT2Gal4>UASdTrpA1	7.07686
DNT2Gal4>UASdTrpA1	7.3961
DNT2Gal4>UASdTrpA1	7.9384
DNT2Gal4>UASdTrpA1	7.72895
DNT2Gal4>UASdTrpA1	6.929
DNT2Gal4>UASdTrpA1	8.95164
DNT2Gal4>UASdTrpA1	8.55604
DNT2Gal4>UASdTrpA1	8.13836
DNT2Gal4>UASdTrpA1	9.0985
DNT2Gal4>UASdTrpA1	8.69966
DNT2Gal4>UASdTrpA1	8.81319
DNT2Gal4>UASdTrpA1	8.66701
DNT2Gal4>UASdTrpA1	9.01062
DNT2Gal4>UASdTrpA1	8.03799
DNT2Gal4>UASdTrpA1	8.09526
DNT2Gal4>UASdTrpA1	7.84496
DNT2Gal4>UASdTrpA1	8.14007
DNT2Gal4>UASdTrpA1	7.24483
DNT2Gal4>UASdTrpA1	7.872
DNT2Gal4>UASdTrpA1	7.52542
UAS dTrpA1/+ (Oregon)	8.34862
UAS dTrpA1/+ (Oregon)	8.00299
UAS dTrpA1/+ (Oregon)	7.411
UAS dTrpA1/+ (Oregon)	6.96536
UAS dTrpA1/+ (Oregon)	7.17057
UAS dTrpA1/+ (Oregon)	5.79901
UAS dTrpA1/+ (Oregon)	7.15335
UAS dTrpA1/+ (Oregon)	7.19382
UAS dTrpA1/+ (Oregon)	7.24236
UAS dTrpA1/+ (Oregon)	7.18839
UAS dTrpA1/+ (Oregon)	5.82169
UAS dTrpA1/+ (Oregon)	6.27726
UAS dTrpA1/+ (Oregon)	6.94344
UAS dTrpA1/+ (Oregon)	6.80642
UAS dTrpA1/+ (Oregon)	7.37239
UAS dTrpA1/+ (Oregon)	5.7609
UAS dTrpA1/+ (Oregon)	6.26692
UAS dTrpA1/+ (Oregon)	7.30464
UAS dTrpA1/+ (Oregon)	6.11374
UAS dTrpA1/+ (Oregon)	7.368
UAS dTrpA1/+ (Oregon)	5.87929
UAS dTrpA1/+ (Oregon)	7.62187
UAS dTrpA1/+ (Oregon)	7.85304
UAS dTrpA1/+ (Oregon)	7.60558
UAS dTrpA1/+ (Oregon)	7.28889
UAS dTrpA1/+ (Oregon)	6.78864
UAS dTrpA1/+ (Oregon)	7.19382
UAS dTrpA1/+ (Oregon)	8.36292
UAS dTrpA1/+ (Oregon)	7.72101
UAS dTrpA1/+ (Oregon)	7.47229
UAS dTrpA1/+ (Oregon)	8.33596
UAS dTrpA1/+ (Oregon)	7.52549
UAS dTrpA1/+ (Oregon)	5.70389
UAS dTrpA1/+ (Oregon)	6.67184
UAS dTrpA1/+ (Oregon)	6.80558
UAS dTrpA1/+ (Oregon)	6.15442
UAS dTrpA1/+ (Oregon)	7.15683
UAS dTrpA1/+ (Oregon)	7.58199
UAS dTrpA1/+ (Oregon)	7.6026
UAS dTrpA1/+ (Oregon)	8.98695
UAS dTrpA1/+ (Oregon)	6.34015
UAS dTrpA1/+ (Oregon)	6.90054
UAS dTrpA1/+ (Oregon)	4.97573
See s=Supplementary File 2.
