# Supplementary material for: A neurotrophin functioning with a Toll regulates structural plasticity in a dopaminergic circuit
Source: eLife. 2024 Dec 20;13:RP102222. doi: 10.7554/eLife.102222 (PMC11661795; doi:10.7554/eLife.102222)
Supplement: Figure 6—source data 7. [file elife-102222-fig6-data7.xlsx]

## Sheet: Figure 6 source data 7
Figure 6G. Over-expresion of DNT-2 increased long-term memory (LTM)
Data used to generate graphs in Figure 6G: reward learning and long-term memory				See Supplementary File 2
Figure 6G left: 23°C controls				Figure 6G right: 30°C test
Genotype	Condition	LTM P.I.		Genotype	Condition	LTM P.I.
tubGAL80ts/+; DNT2-Gal4/+	Starve&train&test-23C	0.137161		tubGAL80ts/+; DNT2-Gal4/+	Starve&train&test-30C	0.0695906
tubGAL80ts/+; DNT2-Gal4/+	Starve&train&test-23C	0.211628		tubGAL80ts/+; DNT2-Gal4/+	Starve&train&test-30C	0.0928105
tubGAL80ts/+; DNT2-Gal4/+	Starve&train&test-23C	0.494426		tubGAL80ts/+; DNT2-Gal4/+	Starve&train&test-30C	0.316054
tubGAL80ts/+; DNT2-Gal4/+	Starve&train&test-23C	0.136039		tubGAL80ts/+; DNT2-Gal4/+	Starve&train&test-30C	0.16875
tubGAL80ts/+; DNT2-Gal4/+	Starve&train&test-23C	0.213836		tubGAL80ts/+; DNT2-Gal4/+	Starve&train&test-30C	0.357762
tubGAL80ts/+; DNT2-Gal4/+	Starve&train&test-23C	-0.0138889		tubGAL80ts/+; DNT2-Gal4/+	Starve&train&test-30C	0.297619
tubGAL80ts/+; DNT2-Gal4/+	Starve&train&test-23C	0.122308		tubGAL80ts/+; DNT2-Gal4/+	Starve&train&test-30C	0.118045
tubGAL80ts/+; DNT2-Gal4/+	Starve&train&test-23C	0.166667		tubGAL80ts/+; DNT2-Gal4/+	Starve&train&test-30C	0.142506
				tubGAL80ts/+; DNT2-Gal4/+	Starve&train&test-30C	0.395081
tubGAL80ts/+; DNT2-Gal4/UAS-DNT2FL[47c]	Starve&train&test-23C	0.180266		tubGAL80ts/+; DNT2-Gal4/+	Starve&train&test-30C	-0.00301659
tubGAL80ts/+; DNT2-Gal4/UAS-DNT2FL[47c]	Starve&train&test-23C	0.122059
tubGAL80ts/+; DNT2-Gal4/UAS-DNT2FL[47c]	Starve&train&test-23C	0.425048		tubGAL80ts/+; DNT2-Gal4/UAS-DNT2FL[47c]	Starve&train&test-30C	0.184211
tubGAL80ts/+; DNT2-Gal4/UAS-DNT2FL[47c]	Starve&train&test-23C	0.288672		tubGAL80ts/+; DNT2-Gal4/UAS-DNT2FL[47c]	Starve&train&test-30C	0.423404
tubGAL80ts/+; DNT2-Gal4/UAS-DNT2FL[47c]	Starve&train&test-23C	0.399399		tubGAL80ts/+; DNT2-Gal4/UAS-DNT2FL[47c]	Starve&train&test-30C	0.652174
tubGAL80ts/+; DNT2-Gal4/UAS-DNT2FL[47c]	Starve&train&test-23C	0.0296935		tubGAL80ts/+; DNT2-Gal4/UAS-DNT2FL[47c]	Starve&train&test-30C	0.208791
tubGAL80ts/+; DNT2-Gal4/UAS-DNT2FL[47c]	Starve&train&test-23C	0.370119		tubGAL80ts/+; DNT2-Gal4/UAS-DNT2FL[47c]	Starve&train&test-30C	0.427177
tubGAL80ts/+; DNT2-Gal4/UAS-DNT2FL[47c]	Starve&train&test-23C	0.169312		tubGAL80ts/+; DNT2-Gal4/UAS-DNT2FL[47c]	Starve&train&test-30C	0.316722
				tubGAL80ts/+; DNT2-Gal4/UAS-DNT2FL[47c]	Starve&train&test-30C	0.311962
w/+;UAS-DNT2FL[47c]/+	Starve&train&test-23C	0.216645		tubGAL80ts/+; DNT2-Gal4/UAS-DNT2FL[47c]	Starve&train&test-30C	0.242105
w/+;UAS-DNT2FL[47c]/+	Starve&train&test-23C	0.289474		tubGAL80ts/+; DNT2-Gal4/UAS-DNT2FL[47c]	Starve&train&test-30C	0.392857
w/+;UAS-DNT2FL[47c]/+	Starve&train&test-23C	0.570273		tubGAL80ts/+; DNT2-Gal4/UAS-DNT2FL[47c]	Starve&train&test-30C	0.35
w/+;UAS-DNT2FL[47c]/+	Starve&train&test-23C	0.203922
w/+;UAS-DNT2FL[47c]/+	Starve&train&test-23C	-0.213097		w/+;UAS-DNT2FL[47c]/+	Starve&train&test-30C	0.278846
w/+;UAS-DNT2FL[47c]/+	Starve&train&test-23C	0.101741		w/+;UAS-DNT2FL[47c]/+	Starve&train&test-30C	0.166667
w/+;UAS-DNT2FL[47c]/+	Starve&train&test-23C	0.0295412		w/+;UAS-DNT2FL[47c]/+	Starve&train&test-30C	0.180876
w/+;UAS-DNT2FL[47c]/+	Starve&train&test-23C	0.590909		w/+;UAS-DNT2FL[47c]/+	Starve&train&test-30C	0.298618
				w/+;UAS-DNT2FL[47c]/+	Starve&train&test-30C	0.172619
				w/+;UAS-DNT2FL[47c]/+	Starve&train&test-30C	0.320261
				w/+;UAS-DNT2FL[47c]/+	Starve&train&test-30C	0.218462
				w/+;UAS-DNT2FL[47c]/+	Starve&train&test-30C	0.15
				w/+;UAS-DNT2FL[47c]/+	Starve&train&test-30C	0.0928433
				w/+;UAS-DNT2FL[47c]/+	Starve&train&test-30C	0.219328
