# Supplementary material for: A neurotrophin functioning with a Toll regulates structural plasticity in a dopaminergic circuit
Source: eLife. 2024 Dec 20;13:RP102222. doi: 10.7554/eLife.102222 (PMC11661795; doi:10.7554/eLife.102222)
Supplement: Supplementary file 1. — Genes expressed in DNT-2 neurons, their potential and/or experimentally verified inputs and outputs, were identified with a combination of reporters (this work) and data from public single-cell RNAseq databases. [file elife-102222-supp1.xlsx]

## Sheet: Sheet1
	Sun et al "A neurotrophin functioning with a Toll regulates structural plasticity in a dopaminergic circuit "
	Supplementary File 1 Expression of Tolls, keks and Toll downstream adaptors in cells related to DNT-2A neurons
	Neuron type	Connectivity evidence (TransTango, BAcTrace, EPAC)	Gene expression
			Toll	kek	wek	sarm/Ect4	Myd88
	DNT-2A neurons		Toll 1,2,6,7 3a	Kek1-6 3a	ND 3	ND 3	ND 3
	DNT2 output neurons
	PAM	TransTango Figure 2A? Synaptogenesis Figure 5C,D	Toll 2, 6 8 1 3b	kek1 3 3-6 neurons with kek2,3,4 3b 3-6 kek6 1	2 neurons3	3 neurons1 3	?
	PPL1	potential outputs, no experimental evidence	Toll 6, 7, 8 in 1 cluster each 1	kek6 1	NE	NE	NE
	DAL	TransTango Fig.3G	Toll 2, 6 7 8 2	kek1-6 2	wek 2	sarm 2	Myd88 2
	abKCs	TransTango Fig.3E	Toll 1 2 6 4	kek 1-6 4	~5 3bwek 4	4 3bsarm4	in core 1 Myd88 4
	a'b'KCs	TransTango Fig.3E	Toll 1 2 6 7 4	kek 1 3 4 5 6 4	~3 3bwek 4	2 3bsarm4	faint 1 Myd88 4
	rKCs	TransTango Fig.3E	Toll 1 2 6,7 4	kek 1 3 4 5 6 4	~10 wek4	15 3bsarm 4	faint 1 Myd88 4
	MBON r2a1	potential outputs, no experimental evidence	NE	kek 6 1	NE	NE	NE
	MBON r5b'2		Toll 2 6 7 2	kek 1 2 4 5 6 2	wek 2	sarm 2	Myd88 2
	MBON a3		Toll 2 6 7 2	kek 1-6 2	wek2	sarm 2	Myd88 2
	MBON a2a'2		Toll 2 6 7 2	kek 1-6 2	wek 2	sarm 2	Myd88 2
	DNT2 input neurons
	PAM	BAcTrace Fig.2B. Synaptogenesis Figure 5C,D	Toll 2, 6 81 3	kek1 3 3-6 neuron with kek2,3,4 3 3-6 kek6 1	2 neurons3	3 neurons1 3	?
	PPL1		Toll 6, 7, 8 in 1 cluster each 1	kek6 1	NE	NE	NE
	DAL		Toll 2, 6 7 8 2 /Toll61	kek 1-6 2 kek-6 1	wek 2	sarm 2	Myd88 2
	PAL	morphology	1Toll6? 1 Toll2 and 2 Toll7?1	kek 61	NE	NE	NE
	MBON r2a1		NE	kek 6 1	NE	NE	NE
	MBON r5b'2		Toll 2 6 7 2	kek 1 2 4 5 6 2	wek 2	sarm 2	Myd88 2
	MBON a3		Toll 2 6 7 2	kek1-6 2	wek 2	sarm 2	Myd88 2
	MBON a2a'2		Toll 2 6 7 2	kek1-6 2	wek 2	sarm 2	Myd88 2
	Data sources:
	1 = confocal data	this work
	2 = RNAseq	Croker et al. (2016) Cell reports 17, 1580 (extracted manually )
	3a = RNAseq	Croset et al. (2018) eLife 7:e34550 (extracted manually )
	3b = RNAseq	Croset et al. (2018) eLife 7:e34550 (extracted using Scope https://scope.aertslab.org)
	4 = RNAseq	Jones et al. (2018) G3 8, 3433
	NE=no evidence
	ND=not detected
