# Supplementary material for: A neurotrophin functioning with a Toll regulates structural plasticity in a dopaminergic circuit
Source: eLife. 2024 Dec 20;13:RP102222. doi: 10.7554/eLife.102222 (PMC11661795; doi:10.7554/eLife.102222)
Supplement: Supplementary file 2. — Table provides full genotypes, sample sizes, statistical tests, multiple comparison corrections, and p-values. [file elife-102222-supp2.xlsx]

## Sheet: Table S2 Statistical analysis
Sun et al "A neurotrophin functioning with a Toll regulates structural plasticity in a dopaminergic circuit "
SUPPLEMENTARY FILE 2 STATISTICAL ANALYSIS
FIGURE	DATA TYPE	GENOTYPE OR EXPERIMENT TYPE	N	COMPARISON	TEST	NORMALITY TEST	DESCRIPTIVE STATISTICS		DF & TEST	p VALUE	MULTIPLE COMPARISONS TESTS	p VALUE
Figure 1: Neurons expressing DNT-2 and its receptors Toll-6 and Kek-6 in the adult brain
Figure 1A	Data	Genotype	No. of brains
Expression & brain registration	GFP/nc82	w; UASFlyBow 1.1/+; DNT2Gal4/+	11
Figure 1B	Data	Genotype	No. of brains
Neuron morphology	DsRed/GFP	w; UASDenMark::RFP, Dsyd1::GFP/+; DNT2Gal4/+	11
Figure 1C	Data	Genotype	No. of brains
DNT-2>MCFO clones	Flag/V5/ HA	hsFLPG5,PEST/+; 10XUAS(FRT.stop)myr::smGdP-HA 10XUAS(FRT.stop)myr::smGdP-V5-THS-10XUAS(FRT.stop)myr::smGdP-FLAG/+; DNT2Gal4/+	16
Figure 1D	Data	Genotype	No. of brains
Neuron morphology	DsRed/GFP	UASDenMark::RFP, Dsyd1::GFP/+;DNT2Gal4/+	11
Figure 1E	Data	Genotype	No. of brains
Neurotransmitter type	GFP/DvGlut	UASFlyBow 1.1/+; DNT2Gal4/+	3
Dopamine receptor Dop2R	DsRed/GFP	LexAopCD8::GFP,UASCD8::RFP/+;Dop2RLexA/+;DNT2Gal4/+	14
Figure 1F	Data	Genotype	No. of brains
Potential DNT-2A inputs	DsRed/GFP	10UASCD8::RFP, 13LexAopCD8::GFP/+;THLexA/+;DNT2Gal4/+	6
	DsRed/GFP	10UASCD8::RFP, 13LexAopCD8::GFP;R58E02LexA/+;DNT2Gal4/+	4
Figure 1H	Data	Genotype	No. of brains
Toll-6GAL4 expression	TH/GFP	w; UASFlyBow 1.1/+; Toll6[MIO2127]Gal4/+	6
Figure 1I	Data	Genotype	No. of brains
kek6GAL4 expression	TH/GFP	w; UASFlyBow 1.1/+; Kek6Gal4/+	4
Figure 2: DNT-2 neurons are functionally connected to dopaminergic neurons
Figure 2A	Data	Genotype	No. of brains
DNT2>TransTango	DsRed/GFP	QUASmyrtdTomato, UASmyrGFP/+;TransTango/+;DNT2Gal4/+	19
Figure 2B	Data	Genotype	No. of brains
PAMLexA, DNT2> BAcTrace 806	DsRed/GFP	R58E02LexA/LexAop2-Syb::GFP-P10(VK37) LexAop-QF2::SNAP25::HIVNES::Syntaxin(VK18) ; DNT2Gal4/UAS-B3Recombinase(attP2) UAS<B3Stop<BoNT/A(VK5)	21
Figure 2C	Data	Genotype	No. of repeats	comparison	Test	Kolmogorov-Smirnov	Mean±s.d.		DF & test value	p value	Dunnett's test to fixed control	p value
TH mRNA levels	qRT-PCR	tubGal80ts/+; DNT2Gal4/+	4	Gal4 control vs. GAL4>UAS	One way ANOVA	N too small	0.9975±0.02183		F(2,9) = 8.465	P=0.0085
		tubGal80ts; DNT2Gal4/UASDNT2FL[47C]	5	Gal4>UAS		>0.1000	1.435±0.2280				**	0.0079
		oregon/+; UASDNT2FL[47C]/+	3	UAS control vs. GAL4>UAS		N too small	1.061±0.166				*	0.0282
Figure 2D	FRET	Genotype	No. of brains	comparison	Test	Kolmogorov-Smirnov	Mean±s.d.		DF & test value	p value	Dunnett's test to fixed control	p value
Epac1 FRET	Time 0s	UASEpac1-camps/+; DNT2Gal4/UASCsCrimsontdTomato/+	9	no retinal vs control	Two way ANOVA		1±0			p=0.3565
		UASEpac1-camps/+; DNT2Gal4/UASCsCrimsontdTomato/+ with retinal	12	Each vs control			1±0			p<0.0001	ns	>0.9999
		UASEpac1-camps/UASDop2RRNAi; DNT2Gal4/UASCsCrimsontdTomato with Retinal	17	retinal with Dop2RRNAi vs control			1±0			p<0.0001	ns	>0.9999
Epac1 FRET	Time 30s	UASEpac1-camps/+; DNT2Gal4/UASCsCrimsontdTomato/+	9	no retinal vs control	Two way ANOVA		0.9871530025±0.0121334953424521
		UASEpac1-camps/+; DNT2Gal4/UASCsCrimsontdTomato/+ with retinal	12	Each vs control			0.962747781538462±0.0323898088522848				ns	0.7368
		UASEpac1-camps/UASDop2RRNAi; DNT2Gal4/UASCsCrimsontdTomato with Retinal	17	retianl with Dop2RRNAi vs control			0.971012265294118±0.0384816169695733				ns	0.9481
Epac1 FRET	Time 60s	UASEpac1-camps/+; DNT2Gal4/UASCsCrimsontdTomato/+	9	no retinal vs control	Two way ANOVA		0.981255485±0.0148507839535619
		UASEpac1-camps/+; DNT2Gal4/UASCsCrimsontdTomato/+ with retinal	12	Each vs control			0.943523858461539±0.04				ns	0.4932
		UASEpac1-camps/UASDop2RRNAi; DNT2Gal4/UASCsCrimsontdTomato with Retinal	17	retinal with Dop2RRNAi vs control			0.932178355294118±0.055091197				ns	0.9049
Epac1 FRET	Time 90s	UASEpac1-camps/+; DNT2Gal4/UASCsCrimsontdTomato/+	9	no retinal vs control	Two way ANOVA		0.97280293625±0.018407123
		UASEpac1-camps/+; DNT2Gal4/UASCsCrimsontdTomato/+ with retinal	12	Each vs control			0.936343621538462±				ns	0.5157
		UASEpac1-camps/UASDop2RRNAi; DNT2Gal4/UASCsCrimsontdTomato with Retinal	17	retinal with Dop2RRNAi vs control			0.904725949411765±0.078481171				ns	0.4788
Epac1 FRET	Time 120s	UASEpac1-camps/+; DNT2Gal4/UASCsCrimsontdTomato/+	9	no retinal to control	Two way ANOVA		0.96267318375±0.026618033
		UASEpac1-camps/+; DNT2Gal4/UASCsCrimsontdTomato/+ with retinal	12	Each to control			0.918820588461538±0.07				ns	0.391
		UASEpac1-camps/UASDop2RRNAi; DNT2Gal4/UASCsCrimsontdTomato with Retinal	17	retinal with Dop2RRNAi vs control			0.882431921764706±0.087350125				ns	0.3827
Epac1 FRET	Time 150s	UASEpac1-camps/+; DNT2Gal4/UASCsCrimsontdTomato/+	9	no retinal vs control	Two way ANOVA		0.94958526625±
		UASEpac1-camps/+; DNT2Gal4/UASCsCrimsontdTomato/+ with retinal	12	Each vs control			0.894850481538462±0.08				ns	0.2418
		UASEpac1-camps/UASDop2RRNAi; DNT2Gal4/UASCsCrimsontdTomato with Retinal	17	retinal with Dop2RRNAi vs control			0.856428972352941±0.106429802				ns	0.3452
Epac1 FRET	Time 180s	UASEpac1-camps/+; DNT2Gal4/UASCsCrimsontdTomato/+	9	no retinal to control	Two way ANOVA		0.9394025475±0.028691545
		UASEpac1-camps/+; DNT2Gal4/UASCsCrimsontdTomato/+ with retinal	12	Each to control			0.878472173846154±0.09				ns	0.1771
		UASEpac1-camps/UASDop2RRNAi; DNT2Gal4/UASCsCrimsontdTomato with Retinal	17	retinal with Dop2RRNAi vs control			0.833016237647059±0.112922354				ns	0.2336
Epac1 FRET	Time 210s	UASEpac1-camps/+; DNT2Gal4/UASCsCrimsontdTomato/+	9	no retinal to control	Two way ANOVA		0.92621659875±0.024432619
		UASEpac1-camps/+; DNT2Gal4/UASCsCrimsontdTomato/+ with retinal	12	Each to control			0.862787426153846±0.09				ns	0.155
		UASEpac1-camps/UASDop2RRNAi; DNT2Gal4/UASCsCrimsontdTomato with Retinal	17	retinal with Dop2RRNAi vs control			0.811598637647059±0.122323932				ns	0.1635
Epac1 FRET	Time 240s	UASEpac1-camps/+; DNT2Gal4/UASCsCrimsontdTomato/+	9	no retinal to control	Two way ANOVA		0.9233435875±0.02966925
		UASEpac1-camps/+; DNT2Gal4/UASCsCrimsontdTomato/+ with retinal	12	Each to control			0.859759765384615±0.10				ns	0.1538
		UASEpac1-camps/UASDop2RRNAi; DNT2Gal4/UASCsCrimsontdTomato with Retinal	17	retinal with Dop2RRNAi vs control			0.789661492352941±0.12912334				*	0.0398
Epac1 FRET	Time 270s	UASEpac1-camps/+; DNT2Gal4/UASCsCrimsontdTomato/+	9	no retinal to control	Two way ANOVA		0.9109644325±0.035098004
		UASEpac1-camps/+; DNT2Gal4/UASCsCrimsontdTomato/+ with retinal	12	Each to control			0.854534213846154±0.10				ns	0.2226
		UASEpac1-camps/UASDop2RRNAi; DNT2Gal4/UASCsCrimsontdTomato with Retinal	17	retinal with Dop2RRNAi vs control			0.774751775294118±0.134062107				*	0.0168
Epac1 FRET	Time 300s	UASEpac1-camps/+; DNT2Gal4/UASCsCrimsontdTomato/+	9	no retinal to control	Two way ANOVA		0.9086351775±0.0248990705295105
		UASEpac1-camps/+; DNT2Gal4/UASCsCrimsontdTomato/+ with retinal	12	Each to control			0.837764041818182±0.12				ns	0.1151
		UASEpac1-camps/UASDop2RRNAi; DNT2Gal4/UASCsCrimsontdTomato with Retinal	17	retinal with Dop2RRNAi vs control			0.762341497647059±0.132495223				*	0.0341
Figure 3: DNT-2 and Toll-6 maintain PAM neuron survival in development and in the adult
Figure 3B	No. of PAMs	Genotype	No. of brains	comparison	Test	Kolmogorov-Smirnov	Mean±s.d.		DF & test value	p value	N/A	p value
All DANs>Histone-YFP (THGAL4, R58e02GAL4)	No. histone-YFP PAMs	UAShistoneYFP/+; THGal4,R58E02Gal4/+	16	Control	Unpaired Student t test	>0.1000	171.1±11.13		t=4.345, df=23	0.0002
		UAShistoneYFP/+;THGal4,R58E02Gal4,DNT2[37]/DNT2[18]	9	dnt2 mutant vs control		>0.1000	151.1±10.91
Figure 3C	No. of PAMs	Genotype	No. of brains	comparison	Test	Kolmogorov-Smirnov	Mean±s.d.			p value	N/A	p value
All DANs>Histone-YFP (THGAL4, R58e02GAL4)	No. Histone-YFP+ PAMs	UAShistoneYFP/+; THGal4,R58E02Gal4/+	16	Control	Unpaired Student t test	>0.1000	171.1±11.13		t=2.988, df=26	0.0061
		UAShistoneYFP/UASToll6RNAi [VDRC 928];THGal4,R58E02Gal4/+	12	UASToll6RNAi to control		>0.1000	158.2±11.66			**
Figure 3D	No. of PAMs	Genotype	No. of brains	comparison	Test	Kolmogorov-Smirnov	Mean±s.d.			p value	Dunnett's test to fixed sample	p value
anti-TH in PAM neurons	No. of TH+ PAMs	CantonS/OregonR	6	column C vs cantons/oregon control	Welch ANOVA	>0.1000	229.3±10.86		t=2.328, df=21.62	<0.0001	ns	0.0574
		DNT2[37]/DNT2[18]	9	column C vs DNT-2 mutant		>0.1000	203±11.16		t=4.918, df=21.36		***	0.0001
		UASToll-6[CY] /+; THGAL4 R58E02GAL4 DNT2[18]/DNT2[37] column c	18			>0.1000	254±41.27
Figure 3E	No. of PAMs	Genotype	No. of brains	comparison	Test	Kolmogorov-Smirnov	Mean±s.d.			p value	N/A	p value
PAMs>nuclear-Tomato (R58E02LexA)	nlstdTomato+ PAMs	R58E02LexA/LexAop-nls-tdTomato;DNT2Gal4/tubGal80ts	16	control	Unpaired Student t test	>0.1000	95.94±13.23		t=3.009, df=33	0.005
		R58E02LexA/LexAopnls-tdTomato,UASDNT2RNAi;DNT2Gal4/tubGal80ts	19	UASDNT2RNAi to control		Yes, 0.0884	83.53±11.18			**
Figure 3F	No. of PAMs	Genotype	No. of brains	comparison	Test	Kolmogorov-Smirnov	Mean±s.d.			p value	N/A
All DANs>Histone-YFP (THGAL4, R58e02GAL4)	Histone-YFP+ PAMs	tubGal80ts/UAShistoneYFP;THGal4,R58E02Gal4/+	8	Each to control	Unpaired Student t test	>0.1000	179±16.38		t=3.072, df=21	0.0058
		tubGal80ts/UAShistoneYFP,UASToll6RNAi;THGal4,R58E02Gal4/Toll6[31]	15	UASToll6RNAi,Toll6[31] to control		>0.1000	160.6±12.11			**
Figure 3G	No. of PAMs	Genotype	No. brains	comparison	Test	Kolmogorov-Smirnov	Mean±s.d.			p value		p value
anti-TH in PAM neurons	No. of TH+ PAMs	tubGal80ts/+;Toll6Gal4/+ (Oregon)	10	Control	Unpaired Student t test	>0.1000	232.8±14.44		t=3.138, df=16	0.0063	N/A
		tubGal80ts/UASToll6RNAi;Toll6Gal4/+	8	UASToll6RNAi Compare to control		>0.1000	209.4±17.26			**
																								t=0.007043, df=20	0.9945
	No. of TH+ PAMs	tubGal80ts/+; DNT2Gal4/+ (Oregon)	24	Control	Kruskal-Wallis ANOVA	0.0156	225.1±15.79		Kruskal-Wallis statistic 29.93	0.0001	Dunn test to fixed control														ns
		tubGal80ts/UASDNT2RNAi; DNT2Gal4/+	26	UASDNT2RNAI to control		0.0309	201±23.2				***	0.0005
		tubGal80ts/+; DNT2Gal4/UASDNT2FL	10	UASDNT2FL to control		>0.1000	240.4±8.208				*	0.0427
Figure 3H	No. of Dcp1 cells	Genotype	No. of brains	comparison	Test	Kolmogorov-Smirnov	Mean±s.d.			p value	Dunnett test to fixed control	p value
Apoptosis: anti-DCP-1 in adult brains	No. of anti-Dcp1+ cells in adult brain	tubGal80ts/+; DNT2Gal4/+ (crossed to Oregon)	16	Control	One way ANOVA	>0.1000	2.688±2.414		F (2, 51) = 14.50	<0.0001
		tubGal80tsUASDNT2RNAi; DNT2Gal4/+	26	UASDNT2RNAI to control		>0.1000	11.73±7.04				****	<0.0001
		tubGal80ts/+; DNT2Gal4/UASDNT2FL	12	UASDNT2FL to control		>0.1000	6.75±3.519				ns	0.0939
Figure 4: DNT-2, Toll-6 and kek-6 are required for synapse formationand arborisations
Figure 4B	synaptogenesis	Genotype	No. of brains		Percentage brains
PAM presynaptic sites at MB lobes	Affected brains	UAS-sytGFP/+;THGAL4 R58E02GAL4/+	23	Control	1	N/A
		UAS-sytGFP/+;THGAL4 R58E02GAL4 DNT-2[18]/DNT-2[37]	25	DNT-2[18]/DNT-2[37]	0.36	N/A
Figure 4C	analysis of dendrites	Genotype	No. of brains	comparison	Test	Kolmogorov-Smirnov	Mean±s.d.			p value	N/A	p value
PAMb2b2' dendritic arbors	Filament No. Dendrite Branch Pts	splitGAL4 MB301BGal4/ UASFlyBow1.1	8	Control	Unpaired Student t test	>0.1000	468±65.06		t=3.982, df=12	0.0018	N/A
		splitGAL4 MB301BGal4/ UASToll-6 RNAi[VDRC928]; UAS FlyBow 1.1	6	UASToll6RNAi to control		>0.1000	348.3±38.81			**
Figure 4D	analysis of dendrites	Genotype	No. of brains	comparison	Test	Kolmogorov-Smirnov	Mean±s.d.			p value	N/A	p value
PAMb2b2' dendritic arbors	Filament No. Dendrite Branch Pts	splitGAL4 MB301BGal4/ UASCD8::GFP	5	Control	Unpaired Student t test	>0.1000	235.4±67.17		t=2.263, df=11	0.0449
		splitGAL4 MB301BGal4/ UASCD8::GFP;UASDNT2CK	8	UASDNT2CK to control		>0.1000	329.3±75.75			*
Figure 4E,E',F	axonal misrouting	Genotype	No. of PPL1 clusters	comparison	Test	N/A	Mean±s.d.			p value	Bonferroni correction	p value
PPL1-ped Axonal misrouting	Number of MB rped misrouted axonal terminals (categorical data)	splitGAL4 MB320CG4/ UASFlyBow1.1	22		Chi Square					p = 0.0224
		splitGAL4 MB320CG4/ UASFlyBow1.1; UASToll6RNAi	24								*	0.0041
		splitGAL4 MB320CG4/ UASFlyBow1.1; UASKeKRNAi	20								ns	0.0332
		splitGAL4 MB320CG4/ UASFlyBow1.1 UASKeKRNAi UASToll6RNAi	30								*	0.0082
		splitGAL4 MB320CG4/ UASmCD8GFP	32		Chi Square					p = 0.0417
		splitGAL4 MB320CG4/ UASmCD8GFP; UASDNT-2CK	32								ns	0.58
		splitGAL4 MB320CG4/ UASmCD8GFP; UASDNT-2FL	34								*	0.0438
Figure 4G	synapses	Genotype	No. of PAM clusters	comparison	Test	N/A	Mean±s.d.			p value	Bonferroni correction	p value
Effect of Toll6 and Kek6 knokdown in PAM neurons synapses	No. Syt+ synapse volume SMP	tubgal80ts/UAS-HomerGCaMP; PAM Gal4/+ 30ºC control	24	GAL4 Control	Mann Whitney U-test	<0.0001	1.412±0.7289			<0.0001
		tubgal80ts/UAS kek6 RNAi,UAS-HomerGCaMP; PAM Gal4/UAS Toll6RNAi 30ºC test	24	tubGal80ts Toll-6GAL4>UASToll-6RNAi UASkek-6RNAi vs GAL4 control		<0.0001	1.335±0.6913			****
	No. Syt+ synapse volume MB lobe	tubgal80ts/UAS-HomerGCaMP; PAM Gal4/+ 30ºC control	24	GAL4 Control	Mann Whitney U-test	<0.0001	1.252±0.9180			<0.0001
		tubgal80ts/UAS kek6 RNAi,UAS-HomerGCaMP; PAM Gal4/UAS Toll6RNAi 30ºC test	26	tubGal80ts Toll-6GAL4>UASToll-6RNAi UASkek-6RNAi vs GAL4 control		<0.0001	1.108±0.7871			****
Figure 5: DNT-2 neuron activation and DNT-2 over-expression induce synaptogenesis
Figure 5B and Figure 5 figure supplement 2		Genotype	No. of brains	comparison	Test	Kolmogorov-Smirnov	Mean±s.d.			p value	N/A
Actiity dependent structural plasticity of DNT-2 neurons. (DNT-2>HomerGCaMP3, TrpA1)	Effect of neuronal activation on DNT-2 neuron No. of homer+ PSDs	UASHomer-GcaMP/+; DNT2Gal4/+ 18℃	6	Control	Unpaired Student t test	>0.1000	146.8±113.1		t=1.896, df=7	0.0998
		UASHomer-GcaMP/+; DNT2Gal4/UAS TrpA1 18℃	3	dTrpA1 to control		N too small	309±138.7			ns
		UASHomer-GcaMP/+; DNT2Gal4/+ 30℃24h	8	Control	Unpaired Student t test	>0.1000	189.9±95.92		t=2.615, df=14	0.0204
		UASHomer-GcaMP/+; DNT2Gal4/UAS TrpA1 30℃24h	8	dTrpA1 to control		>0.1000	354.9±150.5			*
Figure 5C	structural plasticity	Genotype	No. of brains	comparison	Test	Kolmogorov-Smirnov	Mean±s.d.			p value	N/A	p value
DNT-2 neuron activation can induce synapotogenesis	No. Syt+ synapses SMP	PAMLexA/LexAopSytGcaMP6; DNT2 Gal4/UAS-TrpA1 18℃ control	26	18°C control	Mann Whitney U-test	>0.1000	2756±1259			0.0276
		PAMLexA/LexAopSytGcaMP6; DNT2 Gal4/UAS-TrpA1 30℃ test	28	30°C vs 18°C control		0.0134	3545±873.2			*
	No. Syt+ synapse volume SMP	PAMLexA/LexAopSytGcaMP6; DNT2 Gal4/UAS-TrpA1 18℃ control	26	18°C control	Mann Whitney U-test	<0.0001	1.011±0.8848			<0.0001
		PAMLexA/LexAopSytGcaMP6; DNT2 Gal4/UAS-TrpA1 30℃ test	28	30°C vs 18°C control		<0.0001	0.9579±0.8815			****
	No. Syt+ synapses MB lobe	PAMLexA/LexAopSytGcaMP6; DNT2 Gal4/UAS-TrpA1 18℃ control	26	18°C control	Unpaired Student t test	>0.1000	3509±557.7		t=0.2050 df=52	0.8384
		PAMLexA/LexAopSytGcaMP6; DNT2 Gal4/UAS-TrpA1 30℃ test	28	30°C vs 18°C control		>0.1000	3535±360.8			ns
	No. Syt+ synapse volume MB lobe	PAMLexA/LexAopSytGcaMP6; DNT2 Gal4/UAS-TrpA1 18℃ control	26	18°C control	Mann Whitney U-test	<0.0001	0.8901±0.8907			0.2611
		PAMLexA/LexAopSytGcaMP6; DNT2 Gal4/UAS-TrpA1 30℃ test	28	30°C vs 18°C control		<0.0001	0.8923±0.8816			ns
Figure 5D	structural plasticity	Genotype	No. of brains	comparison	Test	Kolmogorov-Smirnov	Mean±s.d.			p value	N/A	p value
DNT-2 over-expression can induce synapotogenesis	No. Syt+ synapses SMP	PAMLexA/LexAopSytGcaMP6; DNT2 Gal4/+ 25℃	24	Gal4 Control	Unpaired Student t test	>0.1	4116±675		t=0.6288, df=48	0.5324
		PAMLexA/LexAopSytGcaMP6; DNT2 Gal4/UAS-DNT-2FL 25℃	26	Gal4 Control to Gal4 UAS		>0.1	3978±861.3			ns
	No. Syt+ synapse volume SMP	PAMLexA/LexAopSytGcaMP6; DNT2 Gal4/+ 25℃	24	Gal4 Control	Mann Whitney U-test	<0.0001	0.8916±0.8288			<0.0001
		PAMLexA/LexAopSytGcaMP6; DNT2 Gal4/UAS-DNT-2FL 25℃	26	Gal4 Control to Gal4 UAS		<0.0001	1.070±1.232			****
	No. Syt+ synapses MB lobe	PAMLexA/LexAopSytGcaMP6; DNT2 Gal4/+ 25℃	24	Gal4 Control	Mann Whitney U-test	0.0035	2631±346.1		t=4.952 df=46	<0.0001
		PAMLexA/LexAopSytGcaMP6; DNT2 Gal4/UAS-DNT-2FL 25℃	26	Gal4 Control to Gal4 UAS		>0.1000	3253±508.5			****
	No. Syt+ synapse volume MB lobe	PAMLexA/LexAopSytGcaMP6; DNT2 Gal4/+ 25℃	24	Gal4 Control	Mann Whitney U-test	<0.0001	0.8631±0.8885			0.9169
		PAMLexA/LexAopSytGcaMP6; DNT2 Gal4/UAS-DNT-2FL 25℃	26	Gal4 Control to Gal4 UAS		<0.0001	0.8509±0.8441			ns
Figure 6: DNT-2-induced circuit plasticity modifies dopamine-dependent behaviours
Figure 6A	SING	Genotype	No. of repeats (≤12 flies per group)	comparison	Test	Kolmogorov-Smirnov	Mean±s.d.			p value		p VALUE
SING in DNT-2 mutants	30d climibing assay	CantonS/OregonR	3 groups	Control	Mann-Whitney U-test					<0.05	N/A	0.0357
		DNT2[37]/DNT2[18]	5 groups	dnt2 mutant to control
SING in DNT-2RNAi in adult	5 d a.E. climbing assay	wt (Oregon)	6 groups		One Way ANOVA	>0.1000	0.8941±0.05266		F(3, 46)=3.068	<0.0001	Dunnett's test to fixed control
		tubGal80ts/+; DNT2Gal4/+ (Oregon)	20 groups	oregon wt control vs tubGal80tsDNT2Gal4UASDNT2RNAi		0.0607	0.7622±0.05866			****		<0.0001
		tubGal80ts/UASDNT2RNAi; DNT2Gal4/+ (Oregon)	17 groups	Gal4 Control to Gal4 UAS		>0.1000	0.6831±0.05842			***		0.0001
		UASDNT2RNAi/+ (Oregon)	7 groups	UAS Control to Gal4 UAS		>0.1000	0.9643±0.01416			****		<0.0001
Figure 6B	SING	Genotype	No. of repeats (≤12 flies per group)	comparison	Test	Kolmogorov-Smirnov	Mean±s.d.			p value	Dunnett's test to fixed control	p VALUE
SING in Toll-6 RNAi in adult	5 d a.E. climbing assay	tubGal80ts/+; Toll-6GAL4/+ control	6	GAL4 Control	One Way ANOVA	>0.1000			F=5.731 Df=2,11	0.0197
		tubGal80ts/UASkek-6RNAi; Toll-6GAL4/UASToll-6RNAi	5	tubGal80ts Toll-6GAL4>UASToll-6RNAi UASkek-6RNAi vs GAL4 control		>0.1000				*	Dunnett's	0.0337
		UASkek-6RNAi/+; UASToll-6RNAi /+ control	3	tubGal80ts Toll-6GAL4>UASToll-6RNAi UASkek-6RNAi vs UAS control		n too small				*		0.0226
	15 d a.E. climbing assay	tubGal80ts/+; R58E02GAL4/+ control	4		Welch ANOVA	Shapiro-Wilk ns			16.21 (2.000, 5.139)	0.006	Dunnett's
		tubGal80ts/UASkek-6RNAi; R58E02GAL4/UASToll-6RNAi	6	tubGal80ts/UASkek-6RNAi; R58E02GAL4/UASToll-6RNAi vs GAL4 control		Shapiro-Wilk ns				ns		0.3327
		UASkek-6RNAi/+; UASToll-6RNAi/+ control	2	tubGal80ts/UASkek-6RNAi; R58E02GAL4/UASToll-6RNAi vs RNAi control		Shapiro-Wilk ns				**		0.004
Figure 6C	SING	Genotype	No. of repeats (≤12 flies per group)	comparison	Test	Kolmogorov-Smirnov	Mean±s.d.			p value	Dunnett's test to fixed sample	p value
SING RESCUE of DNT-2 LOF with Toll-6 GOF	30d climibing assay	DNT2[18] THGAL4 R58E02GAL4/+	5	control	Welch ANOVA	>0.1000			8.585 (3.000, 8.618)	0.0058
		DNT2[18] THGAL4 R58E02GAL4/DNT2[37]	4	DNT2[18] THGAL4 R58E02GAL4/DNT2[37] vs rescue		N too small				ns		0.7011
		DNT2[18] /DNT2[37]	7	rescue vs control		>0.1000				ns		0.9893
		THGAL4 R58E02GAL4 DNT2[18]/UASToll-6[CY] DNT2[37] rescue	7	DNT2[18] /DNT2[37] vs rescue		>0.1000				*		0.0123
Figure 6D		Genotype	No. of flies (1 fly per dot)	comparison	Test	Kolmogorov-Smirnov	Mean±s.d.			p value	Dunn's test	p value
Locomotion in an open arena: Toll-6CY over-expresed in DANs	Walking speed	DNT2[18] THGAL4 R58E02GAL4/+	63		Kruskal-Wallis ANOVA	< 0.0001				< 0.0001	DNT2[18]DAN control vs rescue	ns
		+/UASToll-6[CY] DNT2[37]	57			< 0.0001					UASToll6CY,DNT2[37] vs rescue	****
		THGAL4 R58E02GAL4 DNT2[18]/UASToll-6[CY] DNT2[37] rescue	57			< 0.0001					rescue vs mutant	ns
		DNT2[18] /DNT2[37]	63			0.0002					DNT2[18]DAN control vs mutant	ns
											UASToll6CY,DNT2[37] vs mutant	****
	Walked distance	DNT2[18] THGAL4 R58E02GAL4/+	63		Kruskal-Wallis ANOVA	0.0237				< 0.0001	DNT2[18]DAN control vs rescue	****
		+/UASToll-6[CY] DNT2[37]	57			0.0167					UASToll6CY,DNT2[37] vs rescue	****
		THGAL4 R58E02GAL4 DNT2[18]/UASToll-6[CY] DNT2[37] rescue	57			> 0.1000					rescue vs mutant	****
		DNT2[18] /DNT2[37]	63			> 0.1000					DNT2[18]DAN control vs mutant	ns
											UASToll6CY,DNT2[37] vs mutant	**
	Time immobile	DNT2[18] THGAL4 R58E02GAL4/+	63		Kruskal-Wallis ANOVA	> 0.1000				< 0.0001	DNT2[18]DAN control vs rescue	*
		+/UASToll-6[CY] DNT2[37]	57			0.0011					UASToll6CY,DNT2[37] vs rescue	****
		THGAL4 R58E02GAL4 DNT2[18]/UASToll-6[CY] DNT2[37] rescue	57			> 0.1000					rescue vs mutant	****
		DNT2[18] /DNT2[37]	63			> 0.1000					DNT2[18]DAN control vs mutant	ns
											UASToll6CY,DNT2[37] vs mutant	ns
Figure 6E and Figure 6-figure supplement 1A		Genotype	No. of flies (1 fly per dot)	comparison	Test	Kolmogorov-Smirnov	Mean±s.d.			p value	Dunn's test to fixed sample	p value
Locomotion in an open arena: DNT-2 over-expression in DNT-2 neurons	30℃	tubGal80ts;DNT2Gal4; Oregon	46	Gal4 control	Kruskal-Wallis ANOVA	0.09	6.578±2.0			<0.0001
		tubGal80ts; DNT2Gal4, UASDNT2FL47C	54	Gal4 Control to DNT2Gal4DNT2FL		>0.1	8.142±3.005			****		<0.0001
		Oregon, UASDNT2FL47C	33	UAS Control to Gal4 UAS		0.0377	6.649±1.957			***		0.0002
Figure 6F and Figure 6-figure supplement 1B		Genotype	No. of flies (1 fly per dot)	comparison	Test	Kolmogorov-Smirnov	Mean±s.d.			p value	Dunn's test to fixed control	p value
Locomotion in an open arena: TrpA1 activation of DNT-2 neurons	30℃	DNT2Gal4; Oregon	41	Gal4 control	One Way ANOVA	>0.1	6.672±2.096		F=33.62	<0.0001	Dunnett
		UASdTrpA1; DNT2Gal4	27	Gal4 Control to DNT2Gal4 TrpA1		>0.1	7.997±0.6341			****		<0.0001
		Oregon, UASdTrpA1	43	UAS Control to Gal4 UAS		0.0574	7.047±0.8314			***		0.0001
Figure 6G		Genotype	No. of repeats (10 flies per group)	comparison	Test	Kolmogorov-Smirnov	Mean±s.d.			p value	Dunnett's test to fixed control	p value
Appetitive Long term memory in DNT-2 GOF	23℃	tubGal80ts/+; DNT2Gal4/+. (Oregon) control.	8	Gal4 control	One way ANOVA	0.0891				0.8006	Gal4 control vs Gal4 UAS	ns
		tubGal80ts/ UASDNT2RNAi; DNT2Gal4/+	8	Gal4 Control to DNT2Gal4DNT2FL		0.5554					UAS Control vs Gal4 UAS	ns
		UASDNT2RNAi/+ (Oregon) control	8	UAS Control to Gal4 UAS		0.705
	30℃	tubGal80ts/+; DNT2Gal4/+. (Oregon) control.	10	Gal4 control	One way ANOVA	0.4812				0.0118	Gal4 control vs Gal4 UAS	*
		tubGal80ts/ UASDNT2RNAi; DNT2Gal4/+	10	Gal4 Control to DNT2Gal4DNT2FL		0.339					UAS Control vs Gal4 UAS	*
		UASDNT2RNAi/+ (Oregon) control	10	UAS Control to Gal4 UAS		0.7536
Figure 1 Figure supplement 1: Neurotransmitters tested in DNT- 2A neurons.
Figure 1-S1A,B		Genotype	No. of brains
Dopamniergic	TH/GFP	UAShistoneYFP/+; DNT2Gal4/+	1
Figure 1-S1C		Genotype	No. of brains
Dop1R2	DsRed/GFP	LexAopCD8GFP, UASCD8::RFP/+; Dop1R2LexA/+; DNT2Gal4/+	7
Figure 1-S1D		Genotype	No. of brains
Serotonergic	GFP/5HT	UASFlyBow B1.1/+; DNT2Gal4/+	1
Figure 1-S1E		Genotype	No. of brains
Octopaminergic	DsRed/GFP	LexAopCD8::GFP,UASDenMark/+;Tdc2LexA/+;DNT2Gal4/+	2
Figure 1-S1F		Genotype	No. of brains
Cholinergic	TH/ChAT4b1	UAShistoneYFP/+;DNT2Gal4/+	6
Figure 1-S1G,H		Genotype	No. of brains
Gabaergic	DsRed/GFP	GADLexA/LexAopCD8::GFP,UASCD8::RFP/+;+;DNT2Gal4/+	4
Figure 1 figure supplement 2: Identification of Toll-6 and kek-6 expressing neurons
Figure 1-S2A		Genotype	No. of brains
	GFP/TH	MB247Gal80/UASFB1.1; Kek6Gal4	1
Figure 1-S2B		Genotype	No. of brains
	GFP/DsRed	LexAopCD8GFP, UASCD8::RFP; R25D01LexA/Kek6Gal4	4
Figure 1-S2C		Genotype	No. of brains
	GFP/DsRed	LexAopCD8GFP, UASCD8::RFP; R14C08LexA/Toll6Gal4	5
Figure 1-S2D		Genotype	No. of brains
	YFP/TH	UAS-hisYFP/+; Toll-6 GAL4[MIO2127]/+
Figure 1-S2D		Genotype	No. of brains
	YFP/TH	UAS-hisYFP/+; kek-6 GAL4/+
Figure 1-S2G		Genotype	No. of brains
	GFP/DsRed	LexAopCD8GFP, UASCD8::RFP/+; DALLexA/+; Toll6Gal4/+	8
Figure 1-S2H		Genotype	No. of brains
	GFP/DsRed	LexAopCD8GFP, UASCD8::RFP/+; DALLexA/+, Kek6Gal4/+	1
Figure 1-S2I	Data	Genotype	No. of brains
Toll-6>MCFO clones	Flag/V5/ HA	hsFLPG5,PEST/+; 10XUAS(FRT.stop)myr::smGdP-HA 10XUAS(FRT.stop)myr::smGdP-V5-THS-10XUAS(FRT.stop)myr::smGdP-FLAG/+; Toll6Gal4/+	16
Figure 1-S2J	Data	Genotype	No. of brains
kek-6>MCFO clones	Flag/V5/ HA	hsFLPG5,PEST; 10XUAS(FRT.stop)myr::smGdP-HA 10XUAS(FRT.stop)myr::smGdP-V5-THS-10XUAS(FRT.stop)myr::smGdP-FLAG/+; Kek6Gal4/+	16
Figure 2 figure supplement 1: TransTango connectivity controls
TransTango	DsRed/GFP	QUASmyrtdTomato, UASmyrGFP/+;TransTango @attP40/+ (CantonS)	2
Figure 5 figure supplement 1 Neuronal-activity increased production and cleavage of DNT-2
Figure 5- S1A	No. GFP+ spots	Genotype	No. of brains	comparison	Test	Kolmogorov-Smirnov	Mean±s.d.			p value
Neuronal activity increases DNT-2 levels and/or secretion	No. DNT2-GFP+ spots	UASDNT2FLGFP/+; DNT2Gal4/+ 18℃	7	Control	Unpaired t test	>0.1000	137±60.61		t=0.3435, df=12	0.7371
		UASDNT2FLGFP, UASdTrpA1 /+; DNT2Gal4/+ 18℃	7	dTrpA1 to control		>0.1000	149.9±78.3			ns
		UASDNT2FLGFP/+; DNT2Gal4/+ 30℃24h	13	Control	Mann Whitney test	>0.1000	221.8±140.7		t=4.217, df=21	0.0004
		UASDNT2FLGFP, UASdTrpA1 /+; DNT2Gal4/+ 30℃24h	10	dTrpA1 to control		0.0028	477±147.8			***
Figure 5-S1B		Genotype	No. of repeats
Western Blot	DNT-2FL-GFP cleavage	UASDNT2FLGFP, UASdTrpA1 /+; DNT2Gal4/+	2
	with activity
Figure 6 figure supplements Locomotion controls and seizure
Figure 6-figure supplement 1A		Genotype	No. of flies (1 fly per dot)	comparison	Test	Kolmogorov-Smirnov	Mean±s.d.			p value	Dunn's test to fixed sample	p value
Locomotion in open arena: walking speed	18℃	tubGal80ts;DNT2Gal4; Oregon	37	Gal4 control	Kruskal-Wallis	0.0171	6.607 ±1.471			0.3172
		tubGal80ts; DNT2Gal4, UASDNT2FL47C	38	Gal4 Control to DNT2Gal4DNT2FL		<0.0001	6.377±1.053			ns		>0.9999
		Oregon, UASDNT2FL47C	25	UAS Control to Gal4 UAS		0.0013	6.l373±1.053			ns		0.4432
Figure 6-figure supplement 1B		Genotype	No. of flies (1 fly per dot)	comparison	Test	Kolmogorov-Smirnov	Mean±s.d.			p value	Dunn's test to fixed sample	p value
Locomotion in open arena: walking speed	18℃	DNT2Gal4; Oregon	32	Gal4 control	Kruskal-Wallis	0.004	6.672±2.096			0.0694
		UASdTrpA1; DNT2Gal4	39	Gal4 Control to DNT2Gal4UASTrpA1		0.05838	7.284±1.333					N/A
		Oregon, UASdTrpA1	38	UAS Control to Gal4 UAS		0.0028	7.145±2.032					N/A
Figure 6-figure supplement 2		Genotype	No flies
Seizure behavior	25℃	CantonS/OregonR	10
		DNT2[37],DNT2[18]	15
Seizure behavior	30℃	tubGal80ts;DNT2Gal4; Oregon	11
		tubGal80ts; DNT2Gal4, UASDNT2RNAi	72
		Oregon, UASDNT2RNAi	20
Seizure behavior	30℃	tubGal80ts;DNT2Gal4; Oregon	11
		tubGal80ts; DNT2Gal4, UASDNT2FL47C	27
